# Supplementary material for: Single-cell transcriptomic profiling reveals specific maturation signatures in human cardiomyocytes derived from LMNB2-inactivated induced pluripotent stem cells
Source: Front Cell Dev Biol. 2022 Nov 28;10:895162. doi: 10.3389/fcell.2022.895162 (PMC9742441; doi:10.3389/fcell.2022.895162)
Supplement: Supplementary file 1 [file Table2.XLSX]

## Sheet: CM.merge.markers
gene	cluster	avg_log2FC	pct.1	pct.2	p_val	p_val_adj
MYH7B	C4	0.895343	0.983	0.619	1.55855e-80	3.01798e-76
MYH6	C4	1.50365	1	0.86	2.50362e-75	4.848e-71
PPP1R12B	C4	1.01938	1	0.871	9.11793e-65	1.7656e-60
HRC	C4	0.731906	0.976	0.654	6.67414e-64	1.29238e-59
ATP5F1A	C4	0.55392	1	1	5.67794e-63	1.09948e-58
RYR2	C4	0.813793	0.997	0.751	4.69045e-61	9.08259e-57
ACO2	C4	0.628794	0.997	0.978	2.33311e-60	4.51783e-56
COX7C	C4	0.511987	1	1	3.04953e-60	5.90512e-56
MT-ND3	C4	0.784023	1	0.982	1.15599e-59	2.23847e-55
ATP5F1B	C4	0.607876	1	0.999	7.19106e-59	1.39248e-54
MYBPC3	C4	0.872061	1	0.815	3.98423e-57	7.71506e-53
MTRNR2L8	C4	0.968534	1	0.929	1.57554e-54	3.05087e-50
NEBL	C4	0.885583	1	0.846	2.35363e-54	4.55757e-50
TECRL	C4	0.921446	1	0.861	3.99829e-52	7.74228e-48
ATP5ME	C4	0.504372	0.997	0.997	9.8797e-52	1.91311e-47
GPI	C4	0.505911	1	0.974	4.99814e-51	9.67841e-47
COX6B1	C4	0.46253	1	0.996	1.42987e-50	2.76879e-46
OBSCN	C4	0.555819	0.986	0.871	1.70811e-50	3.30758e-46
NDUFA4	C4	0.500544	1	0.999	2.96567e-50	5.74272e-46
MDH1	C4	0.620268	1	0.99	7.09477e-50	1.37383e-45
FABP3	C4	0.639418	1	0.911	1.32728e-49	2.57014e-45
UQCRC2	C4	0.41878	1	0.988	6.65828e-49	1.28931e-44
MT-ND1	C4	0.767134	1	0.982	6.78462e-49	1.31377e-44
PLN	C4	1.01273	1	0.884	7.1003e-49	1.3749e-44
ATP2A2	C4	0.904649	1	0.992	3.32006e-48	6.42896e-44
ATP5MC1	C4	0.570324	1	0.988	1.5884e-47	3.07577e-43
ATP5F1D	C4	0.455825	1	0.997	2.34209e-47	4.53522e-43
SLC25A4	C4	0.63218	1	0.992	2.82979e-47	5.47961e-43
SDHA	C4	0.442986	0.99	0.964	1.5315e-45	2.9656e-41
UQCRB	C4	0.404372	1	0.998	2.48555e-45	4.81302e-41
NDRG2	C4	0.382296	0.949	0.7	1.07705e-44	2.0856e-40
CADPS	C4	0.548854	0.949	0.714	3.52046e-44	6.81702e-40
TMOD1	C4	0.505843	0.983	0.776	4.02679e-44	7.79748e-40
PGAM2	C4	0.679391	0.867	0.501	4.36696e-44	8.45619e-40
SPHKAP	C4	0.405975	0.803	0.396	1.35871e-43	2.63101e-39
MT-CO3	C4	0.486926	1	0.99	1.56121e-43	3.02312e-39
HSPB7	C4	0.736216	1	0.857	2.34322e-43	4.5374e-39
TCEA3	C4	0.392465	0.901	0.571	3.6851e-43	7.13583e-39
CS	C4	0.469786	0.997	0.952	5.78802e-43	1.12079e-38
COX5B	C4	0.432764	1	0.999	7.99864e-42	1.54886e-37
ATP5PB	C4	0.388499	0.997	0.998	9.86693e-42	1.91063e-37
CRIP2	C4	0.562995	1	0.953	1.16724e-41	2.26025e-37
ATP5MC3	C4	0.492739	1	0.998	2.16881e-41	4.19968e-37
BVES	C4	0.592816	0.993	0.861	4.33699e-41	8.39816e-37
LDB3	C4	0.687022	1	0.796	8.41632e-41	1.62974e-36
TNNT2	C4	0.72944	1	0.977	2.38158e-40	4.6117e-36
COX8A	C4	0.397585	1	0.998	3.12829e-40	6.05762e-36
UQCR10	C4	0.431469	1	0.999	6.29682e-40	1.21932e-35
SLC8A1	C4	0.607973	1	0.84	1.20098e-39	2.32557e-35
TTN	C4	0.807294	1	0.907	1.29143e-39	2.50073e-35
UQCR11	C4	0.388886	1	1	1.30142e-39	2.52007e-35
ATP5PO	C4	0.373788	1	0.995	2.16159e-39	4.18571e-35
PPP1R1A	C4	0.704908	0.963	0.746	2.23489e-39	4.32764e-35
TSPAN32	C4	0.366846	0.718	0.364	3.02217e-39	5.85213e-35
FSD2	C4	0.302483	0.895	0.538	8.86572e-39	1.71676e-34
COX7B	C4	0.477351	1	0.998	2.18167e-38	4.22458e-34
COX4I1	C4	0.33675	1	1	2.93074e-38	5.67509e-34
PDHA1	C4	0.41216	0.997	0.975	3.49457e-38	6.76689e-34
NDUFB1	C4	0.419331	0.997	0.994	4.77252e-38	9.2415e-34
AGL	C4	0.413384	0.973	0.792	8.85908e-38	1.71547e-33
MT-ND2	C4	0.71779	1	0.98	1.25104e-37	2.42252e-33
MT-ATP6	C4	0.525259	1	0.996	3.77566e-37	7.31118e-33
TRDN	C4	0.470159	0.946	0.657	4.25907e-37	8.24727e-33
MB	C4	0.518062	0.864	0.511	4.94523e-37	9.57595e-33
FITM1	C4	0.666708	0.959	0.709	5.46307e-37	1.05787e-32
MYL3	C4	0.879632	0.986	0.829	5.60049e-37	1.08448e-32
COX5A	C4	0.401333	1	0.999	5.74219e-37	1.11192e-32
PFKM	C4	0.397377	0.99	0.933	9.31507e-37	1.80377e-32
FBXO32	C4	0.587139	0.986	0.827	1.1981e-36	2.32001e-32
TNNI1	C4	0.710654	1	0.946	7.19429e-36	1.3931e-31
COX6C	C4	0.360846	1	0.998	2.2188e-35	4.29648e-31
VWDE	C4	0.476419	0.833	0.531	2.99771e-35	5.80476e-31
MTRNR2L12	C4	0.572151	1	0.967	3.01909e-35	5.84616e-31
SHD	C4	0.377205	0.878	0.569	5.65022e-35	1.09411e-30
UQCRH	C4	0.380275	1	1	5.70391e-35	1.1045e-30
PRDX2	C4	0.398976	1	0.994	1.20517e-34	2.33369e-30
AC020909.2	C4	0.766578	1	0.945	1.34526e-34	2.60496e-30
ALPK2	C4	0.429922	0.99	0.863	1.57693e-34	3.05358e-30
ABAT	C4	0.320635	0.85	0.582	1.88864e-34	3.65716e-30
NNT	C4	0.354102	0.983	0.911	1.97382e-34	3.82211e-30
NDUFA1	C4	0.336667	1	0.995	2.0037e-34	3.87997e-30
MT-ND4	C4	0.481084	1	0.985	2.42768e-34	4.70097e-30
ASB2	C4	0.493185	0.949	0.656	5.423e-34	1.05011e-29
CCDC69	C4	0.365694	0.952	0.732	5.48241e-34	1.06161e-29
SNTA1	C4	0.46301	0.997	0.887	8.24895e-34	1.59733e-29
MT-ND4L	C4	0.601716	1	0.968	8.43827e-34	1.63399e-29
CISD1	C4	0.348239	0.993	0.965	1.71982e-33	3.33025e-29
SOD2	C4	0.367325	0.973	0.919	2.12393e-33	4.11278e-29
VEGFB	C4	0.389976	0.993	0.939	2.70806e-33	5.24389e-29
FAM78A	C4	0.457971	0.963	0.675	7.36565e-33	1.42628e-28
GP1BB	C4	0.336313	0.878	0.631	1.53669e-32	2.97565e-28
QKI	C4	0.390856	1	0.977	1.76486e-32	3.41748e-28
MT-ATP8	C4	0.477669	1	0.93	2.60237e-32	5.03923e-28
EDNRA	C4	0.421738	0.959	0.82	2.77023e-32	5.36427e-28
FRMD3	C4	0.339733	0.864	0.499	3.40037e-32	6.58448e-28
GBA2	C4	0.347047	0.983	0.915	4.28364e-32	8.29484e-28
FAM189A2	C4	0.459415	0.973	0.76	6.07575e-32	1.17651e-27
ATP5MG	C4	0.289766	1	0.999	6.92384e-32	1.34073e-27
NDUFB9	C4	0.353395	1	0.989	1.04891e-31	2.03111e-27
FNIP2	C4	0.465218	0.946	0.873	1.17344e-31	2.27224e-27
TPI1	C4	0.346422	1	0.999	1.93165e-31	3.74045e-27
NDUFS1	C4	0.321339	0.997	0.967	2.70268e-31	5.23346e-27
TCAP	C4	0.353439	0.796	0.457	3.56413e-31	6.90158e-27
HAND2	C4	0.544462	0.959	0.853	3.7499e-31	7.26132e-27
ATP1B2	C4	0.345658	0.85	0.593	4.64882e-31	9.00197e-27
AL136171.2	C4	0.509934	0.935	0.623	4.68041e-31	9.06316e-27
SMYD1	C4	0.468716	0.986	0.722	5.63389e-31	1.09095e-26
LBH	C4	0.570753	0.963	0.856	9.06847e-31	1.75602e-26
STRIP2	C4	0.447987	0.881	0.578	1.14337e-30	2.21402e-26
TBC1D4	C4	0.343908	0.912	0.715	1.40246e-30	2.71572e-26
CCDC141	C4	0.410276	0.901	0.665	1.41674e-30	2.74338e-26
RNF207	C4	0.37407	0.993	0.792	1.60048e-30	3.09918e-26
ACOT11	C4	0.289712	0.884	0.606	1.63532e-30	3.16664e-26
CKM	C4	0.87562	0.827	0.544	3.73875e-30	7.23972e-26
PPARGC1A	C4	0.31506	0.901	0.658	4.73199e-30	9.16303e-26
ATP5MPL	C4	0.297868	0.997	0.998	5.16839e-30	1.00081e-25
GOT1	C4	0.431009	0.993	0.98	6.36963e-30	1.23342e-25
MYOM1	C4	0.538721	1	0.786	1.19457e-29	2.31316e-25
MYZAP	C4	0.26252	0.84	0.498	1.19526e-29	2.31449e-25
HK1	C4	0.348631	0.993	0.964	1.4222e-29	2.75394e-25
OGDH	C4	0.294094	0.956	0.843	2.11883e-29	4.1029e-25
ACTN2	C4	0.663551	1	0.815	3.03785e-29	5.88249e-25
RBM24	C4	0.371977	0.98	0.825	4.87458e-29	9.43914e-25
ACAA1	C4	0.298407	0.956	0.927	5.31695e-29	1.02957e-24
PDE4DIP	C4	0.352418	0.969	0.792	7.21786e-29	1.39767e-24
ATP5PF	C4	0.341659	1	0.999	8.28284e-29	1.60389e-24
CACNA1D	C4	0.324854	0.633	0.337	8.64047e-29	1.67314e-24
C1orf105	C4	0.344329	0.646	0.315	9.39659e-29	1.81956e-24
PROX1	C4	0.304356	0.918	0.637	1.11519e-28	2.15946e-24
NID2	C4	0.406716	0.952	0.751	1.73237e-28	3.35457e-24
ETFB	C4	0.33712	0.963	0.944	2.66532e-28	5.16112e-24
BCAM	C4	0.352943	0.932	0.802	4.31457e-28	8.35474e-24
AASS	C4	0.311171	0.963	0.843	6.81728e-28	1.3201e-23
MYL7	C4	0.729227	1	0.999	7.84534e-28	1.51917e-23
MYL4	C4	0.638373	1	0.919	1.14452e-27	2.21625e-23
SLC25A12	C4	0.265721	0.912	0.729	1.70466e-27	3.30091e-23
MT-CO2	C4	0.363029	1	0.989	1.71594e-27	3.32275e-23
BMP7	C4	0.450694	0.915	0.645	1.85347e-27	3.58906e-23
NDUFS7	C4	0.311455	0.997	0.983	2.02511e-27	3.92142e-23
LRRC10	C4	0.353819	0.714	0.387	2.19936e-27	4.25884e-23
UQCRC1	C4	0.342745	0.99	0.984	2.22986e-27	4.31791e-23
MYLK3	C4	0.511641	0.983	0.755	2.4296e-27	4.70467e-23
LAMB2	C4	0.430028	0.98	0.899	2.49917e-27	4.83939e-23
TRIM63	C4	0.303253	0.861	0.592	3.14778e-27	6.09537e-23
APOE	C4	0.560734	0.993	0.975	5.93396e-27	1.14905e-22
PDK1	C4	0.418283	0.997	0.876	6.27128e-27	1.21437e-22
DLAT	C4	0.286591	0.946	0.881	7.32851e-27	1.41909e-22
DKK3	C4	0.462273	1	0.91	9.7699e-27	1.89184e-22
MRPL41	C4	0.315022	0.993	0.995	1.31899e-26	2.55409e-22
NDUFB7	C4	0.265148	1	0.996	1.48499e-26	2.87553e-22
DPF3	C4	0.270567	0.918	0.719	2.13206e-26	4.12851e-22
KIF26B	C4	0.363998	0.986	0.88	2.16523e-26	4.19275e-22
NDUFB10	C4	0.28587	0.997	0.997	3.21816e-26	6.23164e-22
COX6A2	C4	0.281459	0.544	0.242	3.28287e-26	6.35695e-22
CHCHD10	C4	0.426159	1	0.993	4.09513e-26	7.92981e-22
CACNA1C	C4	0.294458	0.935	0.7	6.67569e-26	1.29268e-21
HADHA	C4	0.261355	0.99	0.984	1.16907e-25	2.26379e-21
DUSP27	C4	0.268627	0.83	0.522	1.96817e-25	3.81117e-21
NDUFB5	C4	0.266524	0.997	0.994	2.16063e-25	4.18385e-21
WNK2	C4	0.250256	0.816	0.589	2.16194e-25	4.18639e-21
IDH3A	C4	0.304791	0.956	0.884	2.32543e-25	4.50297e-21
TACC2	C4	0.273408	0.966	0.852	3.1301e-25	6.06113e-21
ITGB1BP2	C4	0.323734	0.966	0.673	5.0506e-25	9.77998e-21
ATP1A3	C4	0.289393	0.568	0.295	5.78957e-25	1.12109e-20
NDUFV1	C4	0.310846	0.986	0.979	6.23723e-25	1.20778e-20
HAND2-AS1	C4	0.479853	0.942	0.816	2.04482e-24	3.9596e-20
PARM1	C4	0.262677	0.827	0.563	2.74347e-24	5.31246e-20
MT-CYB	C4	0.389922	1	0.984	5.60943e-24	1.08621e-19
MMP15	C4	0.39695	0.997	0.897	7.8409e-24	1.51831e-19
ENDOG	C4	0.259414	0.956	0.888	9.41904e-24	1.8239e-19
FAM162A	C4	0.263722	0.963	0.926	1.45727e-23	2.82186e-19
PFKP	C4	0.402102	1	0.973	1.96823e-23	3.81128e-19
SPAG7	C4	0.286654	0.986	0.979	2.09609e-23	4.05886e-19
STK39	C4	0.309789	0.925	0.784	2.33208e-23	4.51585e-19
ADPRHL1	C4	0.300531	0.857	0.539	2.60565e-23	5.04559e-19
CMYA5	C4	0.452625	0.918	0.714	2.81894e-23	5.45859e-19
EPB41L3	C4	0.32049	0.99	0.903	2.84005e-23	5.49947e-19
ATP1B1	C4	0.435984	0.993	0.958	3.52598e-23	6.8277e-19
NREP	C4	0.37173	1	0.987	4.46822e-23	8.65226e-19
NDUFA8	C4	0.279502	0.993	0.984	4.59674e-23	8.90112e-19
COX7A2	C4	0.290568	1	0.997	5.51649e-23	1.06821e-18
MT-CO1	C4	0.301914	1	0.99	5.80635e-23	1.12434e-18
EEF1A2	C4	0.31062	0.864	0.66	8.04607e-23	1.55804e-18
MLF1	C4	0.313339	0.929	0.874	8.094e-23	1.56732e-18
MDH2	C4	0.258378	1	0.994	1.15975e-22	2.24574e-18
NUDT4	C4	0.459232	0.993	0.967	1.30733e-22	2.53151e-18
CPVL	C4	0.299162	0.881	0.761	1.40158e-22	2.71401e-18
PLEKHA5	C4	0.321764	0.98	0.925	1.79233e-22	3.47068e-18
CORIN	C4	0.284758	0.731	0.406	3.43919e-22	6.65964e-18
GSTK1	C4	0.261038	0.963	0.937	4.65589e-22	9.01567e-18
ATP5MD	C4	0.269681	1	0.999	5.27677e-22	1.02179e-17
GNAS	C4	0.327988	1	1	8.39154e-22	1.62494e-17
GOT2	C4	0.265937	0.976	0.956	8.94592e-22	1.73229e-17
FHOD3	C4	0.329741	0.986	0.852	1.68319e-21	3.25933e-17
UNC45B	C4	0.382582	1	0.794	2.01424e-21	3.90038e-17
NDUFA3	C4	0.278109	0.99	0.985	2.1376e-21	4.13925e-17
PDLIM5	C4	0.396921	1	0.979	2.2694e-21	4.39446e-17
PGM1	C4	0.254912	0.966	0.912	3.36118e-21	6.50859e-17
NDUFS2	C4	0.261099	0.98	0.951	4.17799e-21	8.09026e-17
RHOQ	C4	0.281647	0.997	0.974	4.76919e-21	9.23507e-17
RBPMS2	C4	0.29217	0.997	0.961	5.39823e-21	1.04531e-16
HSPB3	C4	0.273268	0.908	0.597	6.09933e-21	1.18107e-16
UQCRFS1	C4	0.256908	0.997	0.991	7.18642e-21	1.39158e-16
NDUFA5	C4	0.252872	0.993	0.975	9.83633e-21	1.90471e-16
RTL8C	C4	0.279414	0.99	0.987	1.07948e-20	2.0903e-16
POPDC2	C4	0.450645	0.997	0.813	1.1653e-20	2.25648e-16
NDUFS6	C4	0.283626	0.997	0.998	1.16903e-20	2.26371e-16
CYCS	C4	0.29389	1	0.997	1.17106e-20	2.26763e-16
PAM	C4	0.504582	0.99	0.953	1.43861e-20	2.78573e-16
SLC25A5	C4	0.262222	1	0.997	1.52529e-20	2.95357e-16
HTRA1	C4	0.373715	0.854	0.685	1.92394e-20	3.72552e-16
PSD3	C4	0.290868	0.952	0.828	3.39684e-20	6.57764e-16
NDUFB2	C4	0.268006	1	0.998	3.57358e-20	6.91988e-16
MAST4	C4	0.29908	0.901	0.778	5.80351e-20	1.12379e-15
COL2A1	C4	0.536091	0.993	0.883	5.95604e-20	1.15333e-15
TMEM245	C4	0.27278	0.99	0.924	8.19271e-20	1.58644e-15
ID2	C4	0.35065	0.932	0.796	9.63038e-20	1.86483e-15
COL18A1	C4	0.335722	1	0.944	1.57701e-19	3.05373e-15
PNKD	C4	0.268571	0.997	0.972	2.52522e-19	4.88984e-15
GPX3	C4	0.263182	0.83	0.625	2.96908e-19	5.74932e-15
TRH	C4	0.429841	0.694	0.463	5.75046e-19	1.11352e-14
PKM	C4	0.262522	1	0.997	9.66277e-19	1.8711e-14
PPIF	C4	0.272017	0.969	0.92	9.67531e-19	1.87353e-14
SNHG14	C4	0.358071	1	0.971	1.89811e-18	3.6755e-14
TRIM24	C4	0.283092	0.993	0.971	2.09266e-18	4.05223e-14
ANK3	C4	0.32144	0.942	0.823	2.18238e-18	4.22596e-14
NKX2-5	C4	0.356143	0.983	0.84	2.49076e-18	4.8231e-14
CD81	C4	0.291662	0.997	0.982	4.82943e-18	9.35171e-14
KCNH2	C4	0.265269	0.98	0.855	4.9404e-18	9.5666e-14
MPC1	C4	0.26415	0.983	0.953	5.08944e-18	9.85519e-14
LAMA2	C4	0.311447	0.949	0.724	1.3162e-17	2.54869e-13
MEF2C	C4	0.253828	0.959	0.829	1.43574e-17	2.78017e-13
SCP2	C4	0.317439	0.956	0.934	1.86355e-17	3.60857e-13
MCC	C4	0.286881	0.884	0.783	3.01802e-17	5.84409e-13
CREM	C4	0.26686	0.99	0.955	3.60588e-17	6.98242e-13
PLXNA2	C4	0.296581	0.844	0.649	3.69946e-17	7.16364e-13
MT-ND5	C4	0.417325	1	0.976	3.72644e-17	7.21589e-13
ITSN2	C4	0.284034	0.935	0.891	4.81016e-17	9.31439e-13
SMPX	C4	0.338558	0.993	0.827	7.55144e-17	1.46226e-12
WSB1	C4	0.295146	1	0.973	1.71488e-16	3.3207e-12
ENO3	C4	0.384836	0.993	0.904	1.74357e-16	3.37624e-12
XIRP1	C4	0.269393	0.966	0.725	6.44938e-16	1.24886e-11
KIDINS220	C4	0.251047	0.973	0.936	6.65432e-16	1.28854e-11
CAP2	C4	0.270061	0.993	0.962	6.85388e-16	1.32718e-11
SELENOW	C4	0.272876	1	0.998	9.54348e-16	1.848e-11
RBM38	C4	0.271469	0.986	0.887	4.06418e-14	7.86988e-10
RBM20	C4	0.252763	0.993	0.885	5.78604e-14	1.12041e-09
FILIP1	C4	0.274083	0.993	0.906	1.29656e-13	2.51066e-09
LMO4	C4	0.266456	0.99	0.982	1.35821e-13	2.63003e-09
BMP5	C4	0.26355	0.857	0.694	4.3544e-13	8.43186e-09
MAGED1	C4	0.299821	0.99	0.964	6.40939e-12	1.24112e-07
TNNI3	C4	0.575567	0.731	0.582	7.96676e-12	1.54268e-07
TPM1	C4	0.270652	1	1	1.09715e-11	2.12453e-07
ACTC1	C4	0.336894	1	0.979	1.91336e-11	3.70503e-07
TNNC1	C4	0.314723	1	0.911	8.42106e-11	1.63065e-06
AEBP1	C4	0.25242	0.99	0.943	5.1905e-08	0.00100509
BMP2	C4	0.380264	0.684	0.622	1.1373e-06	0.0220227
PDGFRA	C4	0.325167	0.531	0.484	0.000180144	1
DDIT3	C2	0.983023	0.99	0.821	1.7189e-79	3.32848e-75
BEX2	C2	0.80906	0.99	0.901	7.53504e-75	1.45909e-70
GAS5	C2	1.08582	1	0.998	2.36764e-73	4.58471e-69
EIF1	C2	0.720034	1	1	1.83527e-69	3.55383e-65
STRIT1	C2	1.16478	0.815	0.356	5.61667e-67	1.08761e-62
HADHB	C2	0.683314	0.997	0.986	2.44078e-65	4.72633e-61
IDH1	C2	0.651946	0.997	0.97	1.76157e-64	3.41111e-60
ERICH2	C2	0.410782	0.84	0.428	2.09247e-64	4.05186e-60
SHMT2	C2	0.619318	0.997	0.956	3.36729e-59	6.52042e-55
CEBPB	C2	0.625682	0.99	0.866	6.12304e-59	1.18566e-54
GARS	C2	0.630595	1	0.975	8.61608e-58	1.66842e-53
HSPA9	C2	0.614239	1	0.997	1.15613e-57	2.23873e-53
ISCU	C2	0.514302	0.993	0.97	1.38955e-57	2.69073e-53
YBX3	C2	0.694441	1	0.993	3.12589e-55	6.05297e-51
FTH1	C2	0.84718	1	1	4.02581e-55	7.79558e-51
NDUFAF2	C2	0.455486	0.976	0.872	3.7424e-54	7.24678e-50
BLVRB	C2	0.619132	0.972	0.849	4.34602e-54	8.41562e-50
LONP1	C2	0.485723	0.993	0.958	1.52293e-53	2.949e-49
NUPR1	C2	0.764011	0.732	0.309	1.73326e-53	3.35629e-49
KLHDC7B	C2	0.262392	0.693	0.229	2.10534e-52	4.07678e-48
GHITM	C2	0.525807	0.997	0.998	5.77965e-52	1.11917e-47
EPB41	C2	0.440446	0.955	0.801	5.25976e-50	1.0185e-45
RPL36A	C2	0.465069	1	1	9.24186e-49	1.78959e-44
ABLIM3	C2	0.417524	0.909	0.604	1.09408e-48	2.11857e-44
LAMP3	C2	0.328239	0.794	0.398	2.45884e-48	4.76129e-44
EIF4EBP1	C2	0.598847	0.997	0.994	2.56546e-48	4.96776e-44
CNOT10	C2	0.430509	0.927	0.804	2.81181e-48	5.44479e-44
PCK2	C2	0.509115	0.979	0.777	4.2035e-47	8.13966e-43
NIBAN1	C2	0.63337	0.962	0.723	1.44654e-45	2.80108e-41
MAP1LC3B	C2	0.554195	1	0.996	2.73925e-45	5.30429e-41
UNC5B	C2	0.600146	0.948	0.911	2.81117e-44	5.44354e-40
RPS16	C2	0.419757	1	1	7.43701e-44	1.4401e-39
TIMM9	C2	0.403187	0.976	0.938	1.46894e-42	2.84445e-38
ZFAS1	C2	0.536723	1	0.997	3.3574e-42	6.50127e-38
CHCHD10	C2	0.614611	1	0.993	2.88876e-41	5.5938e-37
MAFG	C2	0.47752	0.955	0.897	4.61902e-41	8.94427e-37
PKN1	C2	0.358145	0.986	0.954	7.3957e-41	1.4321e-36
MKNK2	C2	0.455957	0.969	0.872	8.96655e-41	1.73628e-36
CBX4	C2	0.489608	0.909	0.789	9.45618e-41	1.8311e-36
CEBPG	C2	0.422116	0.99	0.881	3.22875e-40	6.25216e-36
NACA	C2	0.403933	1	1	3.47001e-40	6.71933e-36
AC007405.3	C2	0.297533	0.847	0.561	3.74136e-40	7.24478e-36
MARS	C2	0.404921	0.986	0.967	1.28721e-39	2.49256e-35
TLCD2	C2	0.40239	0.85	0.633	1.72581e-39	3.34187e-35
ARG2	C2	0.556682	0.958	0.792	2.97449e-39	5.75981e-35
HERPUD1	C2	0.572375	0.997	0.963	5.5361e-39	1.07201e-34
COX7A2L	C2	0.421038	1	0.994	1.43713e-38	2.78286e-34
HSPD1	C2	0.407429	1	0.999	2.32381e-38	4.49982e-34
DDIT4	C2	0.586867	0.99	0.765	2.63554e-38	5.10346e-34
MDN1	C2	0.653426	0.927	0.822	3.25624e-38	6.30538e-34
RPL31	C2	0.356443	1	1	5.76607e-37	1.11654e-32
SLC1A5	C2	0.423582	0.976	0.914	7.94117e-37	1.53773e-32
RNF187	C2	0.431219	0.997	0.962	1.15166e-36	2.23008e-32
SESN2	C2	0.489893	0.983	0.797	1.37952e-36	2.67131e-32
ZPR1	C2	0.349452	0.958	0.821	1.41948e-36	2.74867e-32
SQSTM1	C2	0.449289	0.997	0.985	1.62331e-36	3.14338e-32
RPS13	C2	0.411099	1	1	5.99549e-36	1.16097e-31
UCHL1	C2	0.635314	0.997	0.974	1.16962e-35	2.26485e-31
WARS	C2	0.518868	0.993	0.947	1.20483e-35	2.33303e-31
SNHG8	C2	0.418196	0.986	0.924	1.23307e-35	2.38772e-31
EPRS	C2	0.401296	0.99	0.972	1.27109e-35	2.46134e-31
KCMF1	C2	0.385721	1	0.952	1.30758e-35	2.53201e-31
RPL12	C2	0.533938	1	1	2.30496e-35	4.46332e-31
RPL8	C2	0.366505	1	1	2.31029e-35	4.47365e-31
YARS	C2	0.372022	1	0.974	2.69862e-35	5.22562e-31
XBP1	C2	0.468414	0.983	0.969	2.72078e-35	5.26852e-31
MTHFD1L	C2	0.371164	0.976	0.877	8.72085e-35	1.68871e-30
ITPR1	C2	0.376501	0.812	0.537	9.1512e-35	1.77204e-30
SIAH1	C2	0.301147	0.934	0.804	1.39908e-34	2.70917e-30
RPL9	C2	0.359385	1	1	1.47272e-34	2.85177e-30
RNH1	C2	0.358547	0.993	0.976	5.04581e-34	9.77071e-30
RPL26	C2	0.404764	1	1	7.08183e-34	1.37133e-29
LARP6	C2	0.440661	0.969	0.885	1.11446e-33	2.15805e-29
CAST	C2	0.383444	0.99	0.971	1.23662e-33	2.39459e-29
MFAP4	C2	0.447327	0.836	0.574	4.0563e-33	7.85462e-29
RPS5	C2	0.352079	1	1	4.13415e-33	8.00536e-29
SFXN4	C2	0.32838	0.948	0.832	5.82582e-33	1.12811e-28
RACK1	C2	0.397186	1	1	6.02775e-33	1.16721e-28
GOT1	C2	0.503106	0.997	0.979	7.82754e-33	1.51572e-28
ASS1	C2	0.399833	0.937	0.749	1.88044e-32	3.64129e-28
SNHG7	C2	0.320362	0.993	0.922	2.77852e-32	5.38033e-28
EIF1B	C2	0.562621	1	0.991	7.94293e-32	1.53807e-27
TRIB3	C2	0.476355	0.983	0.752	9.15902e-32	1.77355e-27
SNHG29	C2	0.407818	1	0.999	1.4498e-31	2.80738e-27
EEF1D	C2	0.3687	1	0.998	4.80298e-31	9.30049e-27
TSEN15	C2	0.345922	0.976	0.939	6.35156e-31	1.22992e-26
RAD23A	C2	0.332263	0.997	0.987	6.41317e-31	1.24185e-26
HAX1	C2	0.347002	0.993	0.986	7.94595e-31	1.53865e-26
PPP1R15A	C2	0.454173	0.948	0.842	1.5965e-30	3.09147e-26
IARS	C2	0.407937	0.997	0.984	2.02025e-30	3.91201e-26
VEGFA	C2	0.458285	0.937	0.915	2.43814e-30	4.72122e-26
UBXN1	C2	0.304913	0.997	0.97	4.48494e-30	8.68464e-26
CCPG1	C2	0.394754	0.913	0.843	5.30471e-30	1.0272e-25
CNTLN	C2	0.316059	0.805	0.586	8.59394e-30	1.66413e-25
H1F0	C2	0.488787	0.836	0.653	1.27813e-29	2.47498e-25
RPS8	C2	0.367	1	0.999	2.09862e-29	4.06376e-25
CHAC1	C2	0.361187	0.951	0.684	3.14579e-29	6.09151e-25
DDT	C2	0.319619	1	0.988	5.20454e-29	1.00781e-24
HIF3A	C2	0.339816	0.909	0.813	6.63153e-29	1.28413e-24
PLA2G12A	C2	0.336811	0.99	0.949	7.27641e-29	1.409e-24
EIF5	C2	0.316058	0.997	0.995	8.14314e-29	1.57684e-24
ECI1	C2	0.378255	0.993	0.981	9.33731e-29	1.80808e-24
RPL38	C2	0.280214	1	0.999	1.02008e-28	1.97528e-24
RPL4	C2	0.335423	1	0.999	1.38329e-28	2.6786e-24
EEF2	C2	0.383713	1	1	2.95875e-28	5.72933e-24
DCAF10	C2	0.297189	0.906	0.851	3.18096e-28	6.15962e-24
RPL41	C2	0.268334	1	1	3.34033e-28	6.46822e-24
EDF1	C2	0.360699	1	0.995	3.40967e-28	6.60248e-24
TPT1	C2	0.306819	1	1	4.22118e-28	8.1739e-24
RPS18	C2	0.348852	1	1	4.63868e-28	8.98234e-24
PYCR1	C2	0.373975	0.979	0.919	5.93482e-28	1.14922e-23
NECAB3	C2	0.260539	0.899	0.777	6.80306e-28	1.31734e-23
UBE2M	C2	0.321289	0.997	0.991	3.11206e-27	6.02618e-23
EPB41L4A-AS1	C2	0.332689	0.993	0.934	4.12484e-27	7.98734e-23
RPL27	C2	0.292196	1	1	8.28056e-27	1.60345e-22
TSC22D3	C2	0.357501	0.948	0.893	9.09593e-27	1.76134e-22
AP3D1	C2	0.314876	0.997	0.984	1.82029e-26	3.5248e-22
PLIN2	C2	0.357995	0.892	0.735	1.99427e-26	3.86171e-22
CDKN1C	C2	0.303446	0.951	0.832	2.42958e-26	4.70464e-22
ATP5MC2	C2	0.309622	1	0.999	2.58683e-26	5.00913e-22
ESRRA	C2	0.285076	0.948	0.879	2.91228e-26	5.63934e-22
LARS	C2	0.29917	0.997	0.972	3.93598e-26	7.62163e-22
EIF2S2	C2	0.336413	1	1	6.50255e-26	1.25915e-21
DLGAP4	C2	0.280902	0.965	0.909	8.22335e-26	1.59237e-21
RPL21	C2	0.293248	1	1	8.36074e-26	1.61897e-21
CIZ1	C2	0.286874	0.972	0.927	1.43761e-25	2.78379e-21
POPDC3	C2	0.384789	0.99	0.895	1.50232e-25	2.90909e-21
RTRAF	C2	0.349729	0.997	0.999	1.50805e-25	2.92018e-21
FTL	C2	0.399831	1	0.999	1.68701e-25	3.26672e-21
NARS	C2	0.295266	1	0.994	1.856e-25	3.59397e-21
FBXW5	C2	0.275404	0.979	0.929	1.9223e-25	3.72234e-21
RPL36	C2	0.30218	1	0.999	2.71434e-25	5.25605e-21
RHOD	C2	0.297036	0.969	0.91	9.22237e-25	1.78582e-20
LRPPRC	C2	0.319563	0.958	0.961	9.96989e-25	1.93057e-20
RPL37	C2	0.305468	1	1	1.03845e-24	2.01085e-20
RPL32	C2	0.308684	1	1	1.34611e-24	2.60662e-20
SEPHS2	C2	0.32709	0.955	0.874	1.48901e-24	2.88331e-20
RPS15A	C2	0.299812	1	1	1.61565e-24	3.12855e-20
PAM16	C2	0.258092	0.986	0.96	1.789e-24	3.46421e-20
EEF1B2	C2	0.373889	1	1	2.22993e-24	4.31803e-20
RPS3A	C2	0.327897	1	1	2.2427e-24	4.34277e-20
RPL13A	C2	0.305378	1	1	3.19371e-24	6.1843e-20
LITAF	C2	0.289845	0.941	0.758	3.22165e-24	6.2384e-20
RPL13	C2	0.28274	1	1	4.42396e-24	8.56655e-20
AUP1	C2	0.275712	0.962	0.93	4.94338e-24	9.57236e-20
SLC3A2	C2	0.296903	0.997	0.953	5.86842e-24	1.13636e-19
RPS27	C2	0.29663	1	1	8.51101e-24	1.64807e-19
RPS23	C2	0.324334	1	1	1.22944e-23	2.38069e-19
SNX24	C2	0.299839	0.916	0.848	1.45889e-23	2.82499e-19
RPL18	C2	0.277197	1	1	1.51044e-23	2.92481e-19
BTF3L4	C2	0.27197	0.99	0.969	2.09394e-23	4.05471e-19
ATG101	C2	0.255465	0.941	0.824	2.12874e-23	4.12209e-19
IFRD1	C2	0.288042	0.958	0.826	2.30954e-23	4.4722e-19
STOML2	C2	0.340693	0.993	0.984	2.87514e-23	5.56743e-19
TMEM147	C2	0.292037	0.993	0.993	2.92127e-23	5.65675e-19
MPC1	C2	0.325956	0.993	0.951	3.741e-23	7.24408e-19
RPL19	C2	0.282568	1	1	4.8624e-23	9.41556e-19
RCAN2	C2	0.305983	0.955	0.794	7.54859e-23	1.46171e-18
RCOR2	C2	0.25605	0.805	0.618	1.40409e-22	2.71887e-18
ECPAS	C2	0.256969	0.909	0.906	1.61284e-22	3.1231e-18
AIMP2	C2	0.297407	0.951	0.895	2.2153e-22	4.2897e-18
RPLP1	C2	0.274358	1	1	2.3233e-22	4.49883e-18
SLC7A11	C2	0.337715	0.902	0.722	3.86579e-22	7.48572e-18
PRKRA	C2	0.268648	0.93	0.853	4.28877e-22	8.30477e-18
TSC22D1	C2	0.340267	0.993	0.98	5.90092e-22	1.14266e-17
SLC7A1	C2	0.301573	0.916	0.854	6.81828e-22	1.32029e-17
NKAP	C2	0.25516	0.902	0.777	9.41491e-22	1.8231e-17
KIF1A	C2	0.289867	0.934	0.759	1.05578e-21	2.04442e-17
RPL30	C2	0.267327	1	1	1.27674e-21	2.47228e-17
MAF1	C2	0.250892	0.986	0.965	1.30625e-21	2.52942e-17
XPOT	C2	0.286862	0.986	0.93	1.3271e-21	2.5698e-17
MCRIP2	C2	0.317402	0.99	0.964	1.51083e-21	2.92557e-17
TPD52L1	C2	0.365292	0.864	0.74	2.4994e-21	4.83984e-17
RPS27A	C2	0.255573	1	1	2.63954e-21	5.11121e-17
TIMM44	C2	0.256925	0.976	0.934	3.2353e-21	6.26483e-17
RPL5	C2	0.295411	1	1	3.76722e-21	7.29484e-17
RPS6	C2	0.336482	1	1	3.80064e-21	7.35955e-17
ADSL	C2	0.271966	0.99	0.97	4.70986e-21	9.12017e-17
HYOU1	C2	0.358943	0.906	0.912	7.03874e-21	1.36298e-16
FKBP4	C2	0.278924	0.983	0.966	9.82099e-21	1.90174e-16
EEF1A1	C2	0.342956	1	1	1.60755e-20	3.11286e-16
PSAT1	C2	0.355929	0.993	0.896	1.76327e-20	3.41439e-16
SEL1L	C2	0.289044	0.902	0.893	2.07675e-20	4.02142e-16
TCEA1	C2	0.279344	0.997	0.982	2.67334e-20	5.17665e-16
ATF3	C2	0.354685	0.826	0.567	4.0579e-20	7.85771e-16
RTL8A	C2	0.290146	0.948	0.93	4.43285e-20	8.58377e-16
UQCC2	C2	0.267426	0.993	0.991	6.78853e-20	1.31453e-15
BUD31	C2	0.273335	0.993	0.98	8.78367e-20	1.70087e-15
FAM50A	C2	0.252148	0.993	0.977	9.9375e-20	1.9243e-15
CNBP	C2	0.25339	1	0.994	1.40343e-19	2.71759e-15
CARS	C2	0.262529	0.979	0.873	1.46439e-19	2.83564e-15
CMSS1	C2	0.266913	0.941	0.843	1.635e-19	3.16602e-15
SLC1A4	C2	0.263252	0.892	0.79	1.95579e-19	3.7872e-15
SARS	C2	0.300625	0.997	0.984	2.37383e-19	4.59669e-15
EIF3D	C2	0.26552	0.997	0.979	2.59305e-19	5.02118e-15
ZFAND5	C2	0.277622	0.993	0.987	3.2241e-19	6.24314e-15
COPS5	C2	0.255336	0.983	0.946	3.50209e-19	6.78144e-15
DNAJB9	C2	0.451278	0.941	0.906	3.88845e-19	7.5296e-15
RPS12	C2	0.261011	1	1	4.16002e-19	8.05546e-15
BOD1	C2	0.255953	0.997	0.938	4.29976e-19	8.32606e-15
CHCHD3	C2	0.257863	0.976	0.97	8.73095e-19	1.69066e-14
RHOBTB3	C2	0.414017	0.993	0.998	9.59712e-19	1.85839e-14
ANAPC16	C2	0.261244	1	0.997	9.61304e-19	1.86147e-14
RAB33A	C2	0.325549	0.826	0.644	1.48668e-18	2.8788e-14
MT-ND5	C2	0.383833	0.934	0.996	1.9342e-18	3.74539e-14
RPL10	C2	0.277032	1	1	2.54815e-18	4.93424e-14
FNIP2	C2	0.336495	0.951	0.872	3.17141e-18	6.14112e-14
KLHDC8B	C2	0.297848	0.983	0.915	3.31604e-18	6.42118e-14
MTHFD2	C2	0.363602	0.993	0.937	4.59467e-18	8.89711e-14
RPL18A	C2	0.252101	1	1	5.59529e-18	1.08347e-13
RPS2	C2	0.29996	1	1	6.20624e-18	1.20178e-13
HIST3H2A	C2	0.302043	0.854	0.704	2.17629e-17	4.21416e-13
G0S2	C2	0.340408	0.613	0.38	2.27589e-17	4.40703e-13
PABPC1	C2	0.264675	1	1	2.87953e-17	5.57592e-13
TES	C2	0.27557	0.916	0.889	4.1248e-17	7.98726e-13
SNHG5	C2	0.26186	1	0.997	5.85325e-17	1.13342e-12
CTNNA1	C2	0.257207	0.997	0.995	6.83139e-17	1.32283e-12
LDHB	C2	0.285116	1	1	9.65096e-17	1.86881e-12
WIPI1	C2	0.263887	0.902	0.866	1.24986e-16	2.42024e-12
NUCB2	C2	0.312234	0.951	0.885	2.09825e-16	4.06306e-12
SEC11C	C2	0.279788	0.899	0.772	2.39847e-16	4.64439e-12
CYSTM1	C2	0.261274	0.965	0.928	9.61809e-16	1.86245e-11
CEBPD	C2	0.333269	0.85	0.729	2.14874e-15	4.16082e-11
AP2B1	C2	0.261401	0.983	0.973	2.30603e-15	4.4654e-11
ATF5	C2	0.33963	0.948	0.841	5.42344e-15	1.0502e-10
ODC1	C2	0.258633	1	0.978	2.76739e-14	5.35877e-10
ANXA3	C2	0.317145	0.972	0.923	1.11463e-13	2.15837e-09
SLC25A6	C2	0.270894	1	0.999	3.50258e-13	6.78239e-09
RTN4	C2	0.287852	1	0.999	3.70245e-13	7.16942e-09
MT-ND1	C2	0.312345	0.951	0.997	6.07213e-12	1.17581e-07
VDAC2	C2	0.253997	1	0.999	6.19597e-12	1.19979e-07
BEX1	C2	0.341725	0.969	0.937	1.90621e-11	3.69119e-07
HMGA1	C2	0.271099	0.99	0.986	2.18881e-11	4.23842e-07
MT-ND2	C2	0.3079	0.951	0.995	3.80714e-11	7.37215e-07
GYPC	C2	0.286216	0.983	0.96	2.46238e-10	4.76816e-06
HAND2-AS1	C2	0.326015	0.899	0.83	2.02453e-09	3.9203e-05
HES4	C2	0.276793	0.944	0.864	4.38703e-09	8.49504e-05
ID2	C2	0.268656	0.885	0.811	1.45998e-07	0.0028271
UNC5B-AS1	C2	0.280419	0.617	0.521	0.000198222	1
FBN1	C0	0.715865	0.741	0.023	5.88393e-167	1.13936e-162
TAGLN2	C0	1.65186	0.937	0.203	5.88181e-146	1.13895e-141
COL3A1	C0	3.11208	0.91	0.201	3.8793e-140	7.51187e-136
TGFBI	C0	0.852381	0.62	0.018	1.10816e-136	2.14584e-132
ANXA1	C0	1.73057	0.906	0.188	1.9521e-136	3.78005e-132
MARCKS	C0	2.0287	0.988	0.393	1.20346e-134	2.33038e-130
TUBB3	C0	1.31355	0.922	0.226	2.02279e-131	3.91693e-127
SULF1	C0	0.67311	0.651	0.036	3.83294e-130	7.42211e-126
PLAT	C0	0.681246	0.62	0.027	1.87068e-128	3.62239e-124
LIMA1	C0	0.865051	0.871	0.189	2.60562e-128	5.04551e-124
IFI16	C0	0.529808	0.702	0.064	4.20828e-126	8.14891e-122
KCNMA1	C0	0.566754	0.635	0.036	1.12802e-125	2.18429e-121
LOX	C0	0.4654	0.584	0.02	5.60554e-125	1.08546e-120
ACTB	C0	3.03151	1	0.985	1.9684e-124	3.81161e-120
MMP2	C0	1.12147	0.851	0.18	3.30016e-123	6.39042e-119
CLTA	C0	1.30691	1	0.991	4.74144e-122	9.18132e-118
SRSF9	C0	1.2486	0.988	0.898	5.53947e-121	1.07266e-116
ACTG1	C0	3.0001	1	0.995	1.12342e-120	2.17539e-116
H3F3B	C0	1.44388	1	0.986	1.68905e-119	3.27067e-115
ITGA1	C0	1.17245	0.882	0.204	6.52362e-119	1.26323e-114
S100A11	C0	2.52513	0.984	0.695	4.6072e-118	8.92138e-114
PHLDA2	C0	0.684775	0.655	0.055	1.19497e-117	2.31394e-113
SH3BGRL3	C0	1.54471	1	0.871	1.95859e-117	3.79261e-113
IQGAP1	C0	0.703341	0.922	0.301	3.03577e-115	5.87847e-111
TMSB10	C0	1.83897	1	0.997	1.04259e-114	2.01888e-110
CRIM1-DT	C0	0.317995	0.698	0.075	3.54889e-114	6.87208e-110
RAB32	C0	1.03705	0.976	0.499	3.77221e-114	7.3045e-110
CAP1	C0	1.22538	1	0.903	9.00583e-110	1.74389e-105
PTMA	C0	1.51206	1	0.998	4.86318e-109	9.41707e-105
CLIC1	C0	1.39558	0.996	0.973	2.65509e-108	5.14131e-104
P3H3	C0	0.325434	0.788	0.142	4.4614e-108	8.63905e-104
VIM	C0	2.30925	0.996	0.998	8.60822e-108	1.6669e-103
ETS1	C0	0.408015	0.671	0.08	1.92293e-106	3.72355e-102
TMSB4X	C0	2.31364	1	0.969	1.25707e-105	2.4342e-101
CDKN2B	C0	1.04124	0.69	0.103	2.57975e-104	4.99544e-100
TPM3	C0	1.12686	1	0.915	6.20932e-104	1.20237e-99
LIPA	C0	0.700021	0.863	0.251	8.3705e-104	1.62086e-99
COL25A1	C0	0.293877	0.557	0.036	1.42606e-103	2.76143e-99
SEC61B	C0	1.05544	1	0.987	2.97338e-103	5.75765e-99
FXYD5	C0	1.05124	0.961	0.52	7.47647e-103	1.44774e-98
BST2	C0	0.878564	0.694	0.102	1.37499e-102	2.66253e-98
FHL3	C0	0.729756	0.91	0.376	1.61915e-102	3.13533e-98
SPARC	C0	2.09825	0.984	0.837	3.38577e-102	6.55621e-98
BIN1	C0	0.668999	0.922	0.324	5.73888e-102	1.11128e-97
FILIP1L	C0	0.769171	0.753	0.137	1.72652e-101	3.34323e-97
MEST	C0	2.13847	0.945	0.542	2.93058e-100	5.67478e-96
P3H1	C0	0.590306	0.902	0.363	8.63297e-100	1.67169e-95
LASP1	C0	0.851226	0.965	0.575	1.09552e-99	2.12136e-95
MMP14	C0	0.47814	0.792	0.178	5.4628e-99	1.05782e-94
TXN	C0	1.18907	1	0.982	9.97575e-98	1.9317e-93
RAMP2	C0	0.704987	0.792	0.184	1.21227e-97	2.34744e-93
EVA1B	C0	1.13787	0.937	0.604	2.21639e-97	4.29181e-93
THY1	C0	0.534504	0.498	0.026	9.19811e-97	1.78112e-92
SSR2	C0	0.958433	0.996	0.981	9.7456e-97	1.88714e-92
CALD1	C0	1.71627	0.996	0.933	2.62253e-96	5.07827e-92
ANXA5	C0	1.05707	0.992	0.931	2.04811e-95	3.96596e-91
PDGFRB	C0	0.275587	0.565	0.05	5.37111e-95	1.04006e-90
LINC02381	C0	0.473372	0.694	0.111	9.12036e-95	1.76607e-90
ACTG2	C0	1.5724	0.522	0.037	1.53514e-94	2.97264e-90
SERPINE2	C0	2.26808	0.925	0.493	1.89393e-94	3.66741e-90
EDIL3	C0	0.571632	0.792	0.196	8.99891e-94	1.74255e-89
DSC3	C0	0.45748	0.678	0.105	1.46358e-93	2.83407e-89
ARPC3	C0	0.877679	0.992	0.989	1.50894e-93	2.92191e-89
FN1	C0	2.98627	0.969	0.856	3.54443e-92	6.86344e-88
FLNB	C0	1.1644	0.933	0.477	1.5816e-91	3.0626e-87
LIMD2	C0	0.804729	0.953	0.613	1.89343e-91	3.66644e-87
NPM1	C0	1.19903	1	0.997	3.0688e-91	5.94243e-87
TFPI	C0	0.496382	0.588	0.068	3.59665e-91	6.96456e-87
PAPPA	C0	0.756218	0.765	0.191	1.02816e-90	1.99092e-86
SPP1	C0	2.46271	0.592	0.077	1.59847e-90	3.09527e-86
FLNA	C0	1.51859	0.988	0.917	5.86918e-90	1.13651e-85
RCN2	C0	0.778252	0.988	0.954	7.63625e-90	1.47868e-85
GLIPR1	C0	0.266891	0.408	0.008	2.03408e-89	3.93879e-85
S100A10	C0	1.85702	0.992	0.628	2.97651e-89	5.76371e-85
ARF4	C0	0.893958	1	0.957	4.52401e-89	8.76029e-85
PGLS	C0	0.781006	0.98	0.954	1.6547e-88	3.20416e-84
HLA-B	C0	0.398284	0.682	0.125	3.63306e-88	7.03505e-84
LAPTM4A	C0	0.874252	0.992	0.973	7.18613e-88	1.39152e-83
TNC	C0	0.896912	0.62	0.088	1.36843e-87	2.64983e-83
INKA1	C0	0.320204	0.588	0.075	2.18168e-87	4.2246e-83
MYDGF	C0	0.973306	0.988	0.891	4.98522e-87	9.65339e-83
PCDH10	C0	0.297508	0.525	0.047	4.35724e-86	8.43737e-82
POSTN	C0	1.21561	0.478	0.033	1.2037e-85	2.33084e-81
SEC11A	C0	0.657839	0.996	0.987	1.63711e-85	3.17011e-81
HLA-C	C0	0.460476	0.78	0.212	2.21597e-85	4.29101e-81
RPS19	C0	0.85404	1	1	2.6163e-85	5.06619e-81
RPS3	C0	0.868802	1	1	4.10707e-85	7.95292e-81
COTL1	C0	1.27728	0.976	0.706	4.73747e-85	9.17364e-81
SERPING1	C0	0.482182	0.831	0.289	9.17361e-85	1.77638e-80
ARPC2	C0	0.830449	1	0.999	9.95336e-85	1.92737e-80
RRBP1	C0	0.793041	0.969	0.684	6.2414e-84	1.20859e-79
HMGN1	C0	0.854562	1	0.999	1.06007e-83	2.05272e-79
TLE1	C0	0.49978	0.843	0.276	1.12881e-83	2.18583e-79
PCDH18	C0	0.261971	0.42	0.016	1.14369e-83	2.21465e-79
ARID5B	C0	0.551653	0.765	0.188	3.8774e-83	7.5082e-79
KDELR1	C0	0.769188	0.992	0.977	4.70431e-83	9.10943e-79
RPL6	C0	0.762512	1	1	5.31016e-83	1.02826e-78
CALM1	C0	1.02371	0.996	0.979	5.53792e-83	1.07236e-78
FOXC1	C0	0.331423	0.584	0.081	4.97375e-82	9.63118e-78
CNRIP1	C0	0.286252	0.655	0.113	1.06851e-81	2.06907e-77
RPS7	C0	0.753418	1	1	1.30038e-81	2.51807e-77
SUMO2	C0	0.772113	1	0.997	1.30521e-81	2.52741e-77
FTL	C0	1.9333	1	0.999	3.22136e-81	6.23784e-77
EIF4A1	C0	0.943767	1	0.996	9.68101e-81	1.87463e-76
TMOD3	C0	0.452037	0.918	0.43	1.52079e-80	2.94485e-76
RPL14	C0	0.746313	1	0.999	1.5401e-80	2.98226e-76
TKT	C0	1.19981	0.969	0.903	1.72212e-80	3.33472e-76
AP1S1	C0	0.529226	0.937	0.553	5.96204e-80	1.15449e-75
PTBP1	C0	0.573142	0.965	0.766	6.5998e-80	1.27799e-75
CRIM1	C0	0.692255	0.812	0.273	7.50692e-80	1.45364e-75
ENC1	C0	0.948098	0.82	0.286	3.87875e-79	7.51081e-75
RAC1	C0	0.614138	0.996	0.999	6.91181e-79	1.3384e-74
OSTC	C0	0.9429	1	0.978	8.54522e-79	1.6547e-74
RAP1B	C0	0.710054	0.992	0.9	1.79689e-78	3.47951e-74
TCF21	C0	0.30239	0.361	0.007	1.80684e-78	3.49876e-74
DKK1	C0	0.728729	0.439	0.029	2.18707e-78	4.23504e-74
F2R	C0	0.665364	0.851	0.347	3.31694e-78	6.42292e-74
ELK3	C0	0.334973	0.69	0.155	4.60505e-78	8.91721e-74
CPNE2	C0	0.304523	0.745	0.188	7.31791e-78	1.41704e-73
GPC3	C0	0.749336	0.682	0.15	7.79004e-78	1.50846e-73
RAB5C	C0	0.648824	0.984	0.916	6.27999e-77	1.21606e-72
RAB34	C0	0.655712	0.965	0.889	1.1939e-76	2.31187e-72
IFITM3	C0	1.17217	0.965	0.842	2.34289e-76	4.53677e-72
FKBP7	C0	0.266203	0.667	0.137	3.98958e-76	7.72542e-72
BASP1	C0	1.00366	0.98	0.791	9.31101e-76	1.80298e-71
PRSS23	C0	1.05123	0.902	0.505	1.51201e-75	2.92785e-71
EMP3	C0	0.99445	0.969	0.832	1.71506e-75	3.32105e-71
RPL15	C0	0.672204	1	1	2.80504e-75	5.43169e-71
ATP6V1G1	C0	0.594902	1	0.996	2.88088e-75	5.57853e-71
HLA-E	C0	0.373267	0.808	0.263	5.01169e-75	9.70464e-71
RPS6	C0	0.892936	1	1	5.35648e-75	1.03723e-70
ARPC5	C0	0.736462	0.992	0.943	1.0664e-74	2.06497e-70
FOXC2	C0	0.31227	0.416	0.027	1.54662e-74	2.99487e-70
RPL7A	C0	0.87131	1	1	2.2497e-74	4.35633e-70
RPL28	C0	0.696085	1	1	2.33067e-74	4.51311e-70
TFPI2	C0	0.815363	0.424	0.029	2.76733e-74	5.35865e-70
ITGA8	C0	0.328231	0.443	0.036	3.30639e-74	6.40249e-70
TPM4	C0	1.24896	0.984	0.979	9.1829e-74	1.77818e-69
SEC62	C0	0.619704	0.988	0.96	7.45159e-73	1.44293e-68
FBLN1	C0	1.10287	0.914	0.509	3.40524e-72	6.5939e-68
CMTM6	C0	0.531463	0.961	0.761	4.00534e-72	7.75595e-68
PPIB	C0	1.11229	0.996	0.984	1.14146e-71	2.21032e-67
NTM	C0	0.351521	0.576	0.093	1.8563e-71	3.59453e-67
ATP2B1	C0	0.98074	0.969	0.723	2.40996e-71	4.66664e-67
RAB13	C0	0.762958	0.98	0.951	3.88204e-71	7.51719e-67
FHL1	C0	0.890853	0.933	0.486	5.21546e-71	1.00992e-66
RPL11	C0	0.62433	1	1	5.91994e-71	1.14634e-66
CDK4	C0	0.651462	1	0.953	7.20913e-71	1.39598e-66
ZFAS1	C0	1.19447	1	0.997	1.06034e-70	2.05324e-66
TGFB1	C0	0.755769	0.957	0.775	1.43492e-70	2.77859e-66
UGDH	C0	0.453468	0.933	0.535	1.46676e-70	2.84024e-66
RPL13	C0	0.72597	1	1	1.49627e-70	2.89737e-66
MARCKSL1	C0	1.13183	0.988	0.984	1.9897e-70	3.85285e-66
PHLDA1	C0	1.17205	0.925	0.537	2.31211e-70	4.47717e-66
IER2	C0	0.74046	0.933	0.563	3.32959e-70	6.44742e-66
ARSJ	C0	0.281996	0.522	0.073	3.47636e-70	6.73162e-66
HACD3	C0	0.580294	0.992	0.895	3.51214e-70	6.8009e-66
MYL12B	C0	0.94665	1	0.988	6.13701e-70	1.18837e-65
DAD1	C0	0.738962	0.996	0.97	7.67683e-70	1.48654e-65
HAPLN1	C0	0.874553	0.412	0.032	8.11195e-70	1.5708e-65
RPS14	C0	0.634045	1	1	1.36712e-69	2.6473e-65
SLC9A3R1	C0	0.438802	0.863	0.377	2.33216e-69	4.51599e-65
TRAF4	C0	0.582228	0.957	0.685	3.26847e-69	6.32907e-65
CNN3	C0	0.709941	0.992	0.945	3.36332e-69	6.51273e-65
RPL22	C0	0.547606	1	0.999	6.06661e-69	1.17474e-64
DGUOK	C0	0.543474	0.984	0.877	8.52911e-69	1.65158e-64
SELENOF	C0	0.527498	0.996	0.939	9.20207e-69	1.78189e-64
LINC02802	C0	0.407145	0.757	0.264	3.19568e-68	6.18811e-64
EIF3F	C0	0.621183	0.996	1	4.09377e-68	7.92718e-64
ZNF706	C0	0.678941	0.992	0.947	4.93378e-68	9.55376e-64
RHOC	C0	0.790699	1	0.984	6.34925e-68	1.22947e-63
RANBP1	C0	0.650713	0.996	0.967	6.38583e-68	1.23655e-63
ARPC1B	C0	0.737875	0.937	0.765	9.61675e-68	1.86219e-63
RPL5	C0	0.690125	1	1	1.65978e-67	3.214e-63
RPL17	C0	0.691544	1	1	1.80544e-67	3.49606e-63
TIMP1	C0	0.7878	0.976	0.925	2.11814e-67	4.10156e-63
RPL10A	C0	0.615958	1	1	3.29508e-67	6.3806e-63
GNAI2	C0	0.685073	0.984	0.931	3.88714e-67	7.52707e-63
C11orf58	C0	0.562666	1	0.989	5.78866e-67	1.12092e-62
MMP16	C0	0.289997	0.529	0.085	8.23275e-67	1.59419e-62
SEZ6L2	C0	0.390731	0.827	0.336	1.0439e-66	2.02141e-62
SLC39A1	C0	0.561812	0.937	0.691	1.10046e-66	2.13093e-62
RPL35A	C0	0.561984	1	1	2.4216e-66	4.68919e-62
AC124067.2	C0	0.255983	0.373	0.023	2.62119e-66	5.07567e-62
NECAP2	C0	0.369495	0.859	0.425	2.72255e-66	5.27195e-62
CORO1B	C0	0.499236	0.941	0.71	2.96586e-66	5.74309e-62
FBLN2	C0	0.31539	0.678	0.179	3.66356e-66	7.09411e-62
RPL18	C0	0.644999	1	1	3.69781e-66	7.16044e-62
SNRPB	C0	0.816665	0.992	0.956	4.51287e-66	8.73872e-62
APMAP	C0	0.451676	0.957	0.738	5.09575e-66	9.86741e-62
PGRMC1	C0	0.82975	1	0.926	6.03022e-66	1.16769e-61
LURAP1L	C0	0.344312	0.608	0.126	6.63058e-66	1.28395e-61
ANXA2	C0	1.2663	1	0.97	7.28713e-66	1.41108e-61
RPL19	C0	0.61457	1	1	7.93418e-66	1.53637e-61
MAB21L2	C0	0.277625	0.369	0.023	1.09506e-65	2.12047e-61
RCN1	C0	0.731421	0.992	0.97	2.28359e-65	4.42194e-61
QSOX1	C0	0.431484	0.851	0.46	2.46089e-65	4.76527e-61
PPP4C	C0	0.47027	0.992	0.96	3.72066e-65	7.20468e-61
CMTM3	C0	0.533757	0.957	0.708	5.12825e-65	9.93034e-61
UBE2I	C0	0.525489	1	0.979	5.15882e-65	9.98953e-61
KCNG1	C0	0.796273	0.82	0.407	2.92134e-64	5.65687e-60
MTX1	C0	0.446404	0.914	0.655	3.98435e-64	7.71529e-60
ITM2C	C0	0.800601	0.98	0.96	7.27337e-64	1.40842e-59
SERP1	C0	0.752493	0.992	0.959	7.75888e-64	1.50243e-59
KRTCAP2	C0	0.684166	1	0.971	1.20896e-63	2.34103e-59
RPS9	C0	0.566742	1	1	1.23705e-63	2.39543e-59
TMEM35B	C0	0.316891	0.804	0.322	2.04497e-63	3.95988e-59
ARL6IP1	C0	0.684269	0.973	0.692	5.82239e-63	1.12745e-58
SERPINH1	C0	0.850315	0.996	0.982	7.87851e-63	1.5256e-58
DDAH2	C0	0.661866	0.988	0.894	7.88918e-63	1.52766e-58
TRMT112	C0	0.61825	0.996	0.982	1.38242e-62	2.67693e-58
RPL3	C0	0.739619	1	1	1.49483e-62	2.89459e-58
KDELR2	C0	0.698569	0.996	0.99	1.80908e-62	3.50311e-58
RPL10	C0	0.712153	1	1	2.00652e-62	3.88542e-58
TMEM54	C0	0.308083	0.722	0.224	3.74846e-62	7.25852e-58
AKAP12	C0	1.42341	0.98	0.941	4.53883e-62	8.78898e-58
IL32	C0	0.514417	0.337	0.018	4.72256e-62	9.14476e-58
LUM	C0	0.773382	0.447	0.06	5.03282e-62	9.74556e-58
ERP29	C0	0.609856	0.996	0.988	5.38654e-62	1.04305e-57
PSMB1	C0	0.69673	0.984	0.981	6.85343e-62	1.3271e-57
TBX18	C0	0.265813	0.4	0.037	7.81652e-62	1.51359e-57
CNPY2	C0	0.548551	0.992	0.96	8.01534e-62	1.55209e-57
LGALS1	C0	0.332873	0.51	0.082	8.51546e-62	1.64893e-57
BDNF	C0	0.464217	0.514	0.089	9.91232e-62	1.91942e-57
CFL1	C0	0.732737	1	0.999	1.12199e-61	2.17263e-57
DDOST	C0	0.62406	0.976	0.916	1.3123e-61	2.54113e-57
EBPL	C0	0.441449	0.918	0.598	1.35507e-61	2.62395e-57
ABRACL	C0	0.637211	0.941	0.734	1.96726e-61	3.8094e-57
SHISA5	C0	0.516626	0.98	0.77	2.20871e-61	4.27695e-57
SOX4	C0	1.37099	0.988	0.862	2.74314e-61	5.31181e-57
RPS4X	C0	0.627523	1	1	4.14997e-61	8.036e-57
ENSA	C0	0.543659	0.969	0.886	4.63384e-61	8.97296e-57
RHOA	C0	0.540098	0.996	0.991	7.29325e-61	1.41227e-56
DAB2	C0	0.456488	0.776	0.298	1.17107e-60	2.26767e-56
UBA52	C0	0.432329	1	1	1.36463e-60	2.64248e-56
FAM114A1	C0	0.540605	0.875	0.5	1.42109e-60	2.7518e-56
BAX	C0	0.514693	0.973	0.815	2.15908e-60	4.18085e-56
CD44	C0	0.262879	0.38	0.033	2.30826e-60	4.46972e-56
G6PD	C0	0.4679	0.835	0.416	3.18817e-60	6.17357e-56
EDN1	C0	0.780004	0.482	0.077	5.00697e-60	9.69549e-56
RPS10	C0	0.489356	1	0.997	5.09177e-60	9.85971e-56
SYT1	C0	0.480288	0.671	0.202	5.78232e-60	1.11969e-55
SGK1	C0	0.385071	0.431	0.053	6.1625e-60	1.19331e-55
RPS18	C0	0.624684	1	1	1.01351e-59	1.96256e-55
LIMS1	C0	0.726403	0.965	0.815	1.08084e-59	2.09293e-55
SEM1	C0	0.566332	0.992	0.988	1.08629e-59	2.10348e-55
CDC42EP1	C0	0.706306	0.91	0.485	1.25313e-59	2.42657e-55
DZIP1	C0	0.255204	0.686	0.201	1.37308e-59	2.65883e-55
SRP9	C0	0.660193	0.988	0.978	1.41289e-59	2.73593e-55
RPS21	C0	0.558283	1	1	3.78643e-59	7.33204e-55
TMED9	C0	0.670161	0.996	0.968	4.56169e-59	8.83326e-55
MXRA8	C0	0.36274	0.529	0.106	6.21499e-59	1.20347e-54
RPS3A	C0	0.581887	1	1	6.5209e-59	1.26271e-54
RHOU	C0	0.304468	0.682	0.189	8.99489e-59	1.74177e-54
CD63	C0	0.724744	1	0.998	1.52934e-58	2.96141e-54
HEXB	C0	0.396544	0.89	0.563	1.721e-58	3.33254e-54
MFAP2	C0	0.676211	0.855	0.544	1.91087e-58	3.70021e-54
MPG	C0	0.435539	0.949	0.838	3.87515e-58	7.50384e-54
IGFBP7	C0	1.88885	0.918	0.682	3.95596e-58	7.66031e-54
RPL34	C0	0.567558	0.996	1	4.60427e-58	8.91572e-54
CAMK2N1	C0	0.27432	0.549	0.111	1.01003e-57	1.95582e-53
ELOVL1	C0	0.490672	0.933	0.663	2.60133e-57	5.03721e-53
TXNL1	C0	0.510893	0.984	0.949	2.99838e-57	5.80606e-53
LAMP1	C0	0.528005	0.992	0.951	4.82147e-57	9.3363e-53
TM2D2	C0	0.43796	0.937	0.686	5.04757e-57	9.77411e-53
RPS27A	C0	0.507721	1	1	9.55266e-57	1.84978e-52
KDELR3	C0	0.307557	0.78	0.32	1.72322e-56	3.33684e-52
ITM2B	C0	0.729359	0.984	0.967	1.81639e-56	3.51726e-52
APH1A	C0	0.499825	0.957	0.866	2.49343e-56	4.82827e-52
ENAH	C0	0.949757	0.996	0.968	2.7768e-56	5.37699e-52
RPL30	C0	0.475644	1	1	5.50926e-56	1.06681e-51
FJX1	C0	0.41263	0.682	0.226	7.91871e-56	1.53338e-51
TWF2	C0	0.395452	0.906	0.611	8.87725e-56	1.71899e-51
FCGRT	C0	0.516721	0.875	0.581	1.15866e-55	2.24363e-51
SNAI2	C0	0.328236	0.529	0.112	1.35091e-55	2.6159e-51
STMN2	C0	0.705454	0.259	0.005	1.53967e-55	2.98143e-51
RPL29	C0	0.564675	1	1	1.58359e-55	3.06647e-51
TBCB	C0	0.519649	0.988	0.941	2.74747e-55	5.32019e-51
ATOX1	C0	0.501338	0.992	0.974	4.49138e-55	8.69711e-51
PPDPF	C0	0.593802	0.996	0.993	4.77849e-55	9.25307e-51
FKBP1A	C0	0.632856	0.996	0.994	4.99326e-55	9.66896e-51
ATP1B3	C0	0.590164	0.988	0.942	5.15298e-55	9.97823e-51
SERPINE1	C0	0.617442	0.553	0.122	7.00309e-55	1.35608e-50
C12orf57	C0	0.555856	1	0.99	8.00808e-55	1.55068e-50
ILF2	C0	0.571538	0.996	0.984	8.22712e-55	1.5931e-50
TNFRSF1A	C0	0.498975	0.922	0.715	8.58309e-55	1.66203e-50
ST3GAL5	C0	0.409768	0.776	0.321	9.21151e-55	1.78372e-50
RPL26	C0	0.624645	1	1	1.20807e-54	2.33931e-50
PDIA3	C0	0.86401	0.996	0.95	4.60585e-54	8.91876e-50
CDC42EP5	C0	0.349909	0.8	0.311	8.51615e-54	1.64907e-49
UBA2	C0	0.427353	0.98	0.912	1.2184e-53	2.35931e-49
TMED2	C0	0.595957	1	0.97	1.33326e-53	2.58172e-49
CD276	C0	0.426283	0.929	0.688	1.35933e-53	2.6322e-49
PLK2	C0	0.890825	0.796	0.397	1.89912e-53	3.67745e-49
PFN1	C0	0.703476	1	1	2.13146e-53	4.12735e-49
RGS2	C0	0.395107	0.518	0.106	2.4728e-53	4.78832e-49
COL1A1	C0	1.70076	0.918	0.744	2.8831e-53	5.58284e-49
MEIS3	C0	0.629279	0.941	0.748	2.95738e-53	5.72667e-49
RPL24	C0	0.449963	1	1	4.13089e-53	7.99906e-49
PPP1R18	C0	0.396826	0.898	0.553	7.31874e-53	1.4172e-48
COL1A2	C0	1.12315	0.631	0.199	1.42678e-52	2.76281e-48
EFNA5	C0	0.325677	0.745	0.274	1.68296e-52	3.25888e-48
PDIA6	C0	0.829896	1	0.985	2.7377e-52	5.30129e-48
GSTP1	C0	0.71063	1	0.998	3.28812e-52	6.36711e-48
PRELID1	C0	0.562497	0.996	0.996	3.5607e-52	6.89493e-48
PDCD6	C0	0.416058	0.976	0.939	3.56119e-52	6.89589e-48
WDR54	C0	0.273638	0.824	0.383	3.6899e-52	7.14512e-48
AXL	C0	0.496	0.89	0.562	4.08651e-52	7.91312e-48
TMEM87B	C0	0.271106	0.682	0.238	4.15496e-52	8.04566e-48
MDFI	C0	0.436629	0.831	0.454	4.21616e-52	8.16418e-48
SLC3A2	C0	1.28734	0.988	0.956	4.36329e-52	8.44908e-48
SUMO1	C0	0.489177	0.988	0.981	4.49832e-52	8.71055e-48
TPBG	C0	0.312998	0.655	0.211	5.63253e-52	1.09068e-47
B3GAT3	C0	0.355026	0.906	0.596	6.54615e-52	1.2676e-47
CSTB	C0	0.526975	0.996	0.989	1.15328e-51	2.2332e-47
DERL2	C0	0.438234	0.969	0.783	1.32151e-51	2.55898e-47
GDI2	C0	0.45112	1	0.988	1.40992e-51	2.73018e-47
RPS2	C0	0.571674	1	1	1.59948e-51	3.09723e-47
RPL18A	C0	0.497274	1	1	1.60417e-51	3.10632e-47
NNMT	C0	0.386868	0.263	0.01	1.78302e-51	3.45263e-47
RPL36	C0	0.477044	1	0.999	2.16261e-51	4.18768e-47
TMEM208	C0	0.450028	0.961	0.881	2.74363e-51	5.31277e-47
ARHGDIB	C0	0.277063	0.498	0.103	3.029e-51	5.86536e-47
NOTCH3	C0	0.300251	0.729	0.291	3.1103e-51	6.02279e-47
FAU	C0	0.409681	1	1	4.26007e-51	8.2492e-47
VMP1	C0	0.733143	0.976	0.866	4.73529e-51	9.16942e-47
CALM2	C0	0.674827	1	0.997	6.98208e-51	1.35201e-46
EIF3M	C0	0.533838	0.988	0.98	9.72157e-51	1.88249e-46
IFT20	C0	0.38882	0.965	0.731	1.36692e-50	2.6469e-46
RNPEP	C0	0.309225	0.843	0.475	1.60346e-50	3.10495e-46
HLA-A	C0	0.612714	0.957	0.84	3.14255e-50	6.08523e-46
RECQL	C0	0.310799	0.808	0.369	3.20572e-50	6.20756e-46
RACK1	C0	0.626726	1	1	3.67519e-50	7.11663e-46
RPS12	C0	0.573196	1	1	6.85558e-50	1.32751e-45
FAM89B	C0	0.489029	0.965	0.852	9.74761e-50	1.88753e-45
DHRS7	C0	0.382444	0.894	0.595	1.00112e-49	1.93857e-45
CRTAP	C0	0.435115	0.929	0.789	1.01334e-49	1.96223e-45
SARAF	C0	0.5448	0.992	0.996	1.25837e-49	2.43671e-45
TRIR	C0	0.428068	1	0.993	1.28209e-49	2.48264e-45
IFT52	C0	0.324223	0.894	0.531	1.36463e-49	2.64246e-45
TOMM20	C0	0.493143	1	0.995	1.38157e-49	2.67528e-45
PSMB2	C0	0.508388	0.988	0.962	1.90111e-49	3.6813e-45
RPL13A	C0	0.547325	1	1	2.06796e-49	4.0044e-45
TUBA1C	C0	0.85966	0.929	0.651	2.58541e-49	5.00638e-45
RBM3	C0	0.560044	0.98	0.883	2.59407e-49	5.02316e-45
EGFL7	C0	0.427403	0.843	0.441	2.83312e-49	5.48606e-45
TPT1	C0	0.522868	1	1	2.85886e-49	5.53589e-45
LPCAT1	C0	0.254896	0.765	0.312	2.92024e-49	5.65476e-45
RPL12	C0	0.693047	1	1	3.44353e-49	6.66805e-45
CERS5	C0	0.274383	0.847	0.44	3.77304e-49	7.30611e-45
DLK1	C0	1.04078	0.396	0.061	7.60185e-49	1.47202e-44
B2M	C0	0.691543	0.988	0.941	1.69236e-48	3.27709e-44
ITGA2	C0	0.339865	0.353	0.042	1.8626e-48	3.60675e-44
SNRPD1	C0	0.555482	0.984	0.947	3.58832e-48	6.94841e-44
PFDN2	C0	0.569091	0.98	0.975	3.70711e-48	7.17845e-44
PTGES3	C0	0.514505	1	0.992	3.92857e-48	7.60729e-44
AP2S1	C0	0.506632	0.996	0.987	4.05228e-48	7.84684e-44
TSPO	C0	0.54235	0.773	0.406	4.31115e-48	8.34811e-44
YIPF3	C0	0.406107	0.961	0.93	4.34718e-48	8.41789e-44
COL6A2	C0	0.771186	0.937	0.755	4.60709e-48	8.92117e-44
LSM7	C0	0.45947	0.996	0.984	8.22134e-48	1.59198e-43
BZW1	C0	0.530545	0.992	0.983	8.30203e-48	1.6076e-43
CNN2	C0	0.690766	0.984	0.943	9.09445e-48	1.76105e-43
PRDX4	C0	0.493633	0.973	0.9	1.13659e-47	2.20089e-43
RPL37	C0	0.460988	1	1	1.36918e-47	2.65129e-43
ORAI2	C0	0.395653	0.957	0.756	1.4935e-47	2.89201e-43
SCRG1	C0	0.278334	0.463	0.095	2.07241e-47	4.01301e-43
SNRPE	C0	0.595123	0.992	0.97	2.25704e-47	4.37054e-43
INHBA	C0	0.725707	0.616	0.212	2.37269e-47	4.59448e-43
LHX2	C0	0.265778	0.318	0.031	4.05497e-47	7.85204e-43
TALDO1	C0	0.569428	0.984	0.968	6.54414e-47	1.26721e-42
UFD1	C0	0.397857	0.953	0.824	6.95449e-47	1.34667e-42
SLC39A6	C0	0.441935	0.953	0.777	7.18316e-47	1.39095e-42
TMCO1	C0	0.491592	0.98	0.927	8.23833e-47	1.59527e-42
EIF5A	C0	0.685474	1	0.988	8.59873e-47	1.66506e-42
PSMA7	C0	0.477974	0.996	0.996	1.1144e-46	2.15792e-42
PHLDA3	C0	0.457711	0.733	0.338	1.16719e-46	2.26014e-42
NSA2	C0	0.388646	0.984	0.979	2.26591e-46	4.3877e-42
SKAP2	C0	0.353788	0.82	0.398	2.58874e-46	5.01283e-42
CDC42	C0	0.528438	1	0.994	2.97203e-46	5.75504e-42
TWF1	C0	0.320155	0.914	0.662	3.19264e-46	6.18223e-42
ST13	C0	0.501517	1	0.996	3.49029e-46	6.75859e-42
MPST	C0	0.452458	0.988	0.947	3.61063e-46	6.99162e-42
EIF4E2	C0	0.413763	0.965	0.886	9.22187e-46	1.78572e-41
EFNB2	C0	0.621354	0.8	0.446	9.3135e-46	1.80347e-41
TXNDC5	C0	0.526326	0.933	0.789	1.27884e-45	2.47635e-41
SULF2	C0	0.325796	0.62	0.208	1.3349e-45	2.58489e-41
THBS3	C0	0.270971	0.733	0.302	1.3365e-45	2.588e-41
HOTAIRM1	C0	0.363227	0.651	0.227	1.34367e-45	2.60188e-41
HOXB2	C0	0.477485	0.835	0.474	1.46585e-45	2.83847e-41
PWP1	C0	0.30972	0.918	0.653	2.19958e-45	4.25926e-41
TMCO3	C0	0.338259	0.914	0.657	2.69925e-45	5.22682e-41
MME	C0	0.315235	0.514	0.13	3.3501e-45	6.48714e-41
EIF2AK4	C0	0.384687	0.937	0.737	3.39571e-45	6.57546e-41
BTF3	C0	0.63695	1	0.997	3.76946e-45	7.29917e-41
HM13	C0	0.498279	0.976	0.93	3.92143e-45	7.59347e-41
CDH13	C0	0.256591	0.525	0.129	4.08207e-45	7.90452e-41
RPS5	C0	0.494905	1	1	5.26297e-45	1.01912e-40
LY6E	C0	0.534183	0.973	0.825	5.48129e-45	1.0614e-40
RPL32	C0	0.401747	1	1	5.70486e-45	1.10469e-40
PTGR1	C0	0.433363	0.918	0.686	6.08186e-45	1.17769e-40
APRT	C0	0.524187	0.988	0.97	7.22179e-45	1.39843e-40
SNAP23	C0	0.30777	0.886	0.556	7.64145e-45	1.47969e-40
PAPSS1	C0	0.34452	0.882	0.604	8.35207e-45	1.61729e-40
PTK7	C0	0.427635	0.875	0.603	9.90095e-45	1.91722e-40
BRK1	C0	0.433437	0.992	0.995	1.02286e-44	1.98066e-40
MMP23B	C0	0.629153	0.78	0.412	1.09721e-44	2.12464e-40
ACTR3	C0	0.558164	0.984	0.972	1.13721e-44	2.20209e-40
GLIPR2	C0	0.443828	0.831	0.492	1.24271e-44	2.40638e-40
TTYH1	C0	0.277487	0.263	0.018	1.71785e-44	3.32644e-40
NQO1	C0	0.555883	0.71	0.307	1.89338e-44	3.66634e-40
RPL9	C0	0.435064	1	1	2.1e-44	4.06644e-40
POMP	C0	0.527105	0.996	0.996	2.22015e-44	4.29909e-40
FABP5	C0	0.760059	0.922	0.72	2.43785e-44	4.72066e-40
RER1	C0	0.382966	0.992	0.948	2.89717e-44	5.61007e-40
MAGOH	C0	0.423999	0.949	0.764	4.22845e-44	8.18797e-40
RPS15A	C0	0.44109	1	1	5.09182e-44	9.8598e-40
RPSA	C0	0.510202	1	1	6.38859e-44	1.23709e-39
CAMLG	C0	0.417512	0.973	0.896	7.12149e-44	1.37901e-39
SNRPF	C0	0.497948	0.976	0.974	7.58065e-44	1.46792e-39
KLF3	C0	0.308148	0.914	0.606	1.09176e-43	2.11409e-39
ARPC4	C0	0.446918	0.965	0.876	1.69145e-43	3.27532e-39
PEG10	C0	0.70001	0.922	0.711	2.26261e-43	4.38131e-39
AP3S1	C0	0.380039	0.969	0.874	2.2852e-43	4.42507e-39
ATP6AP2	C0	0.414707	0.965	0.862	2.69246e-43	5.21367e-39
PLAU	C0	0.314112	0.263	0.019	2.78753e-43	5.39777e-39
NENF	C0	0.417816	0.925	0.687	2.79076e-43	5.40404e-39
ITGB1	C0	0.716954	1	0.986	2.82601e-43	5.47229e-39
OCIAD2	C0	0.778688	0.918	0.796	3.18103e-43	6.15975e-39
UAP1	C0	0.330498	0.816	0.463	3.2024e-43	6.20112e-39
GTF2H5	C0	0.413867	0.976	0.931	4.2104e-43	8.15301e-39
RPS8	C0	0.489848	1	0.999	5.38446e-43	1.04265e-38
ANP32B	C0	0.496988	0.996	0.992	5.72521e-43	1.10863e-38
AUXG01000058.1	C0	0.581187	0.659	0.25	6.42123e-43	1.24341e-38
SMARCB1	C0	0.379273	0.969	0.952	8.67516e-43	1.67986e-38
SINHCAF	C0	0.38923	0.953	0.789	9.98706e-43	1.93389e-38
ADAM9	C0	0.361807	0.949	0.737	1.0947e-42	2.11977e-38
CALU	C0	0.582512	0.996	0.98	1.36345e-42	2.64018e-38
OAT	C0	0.284197	0.847	0.521	1.63624e-42	3.16842e-38
RAN	C0	0.501361	0.996	1	2.03109e-42	3.933e-38
BMP1	C0	0.338028	0.776	0.396	2.60579e-42	5.04584e-38
GNAI3	C0	0.386466	0.969	0.926	3.29065e-42	6.37201e-38
ZNF581	C0	0.403534	0.922	0.677	3.37037e-42	6.52638e-38
POLR3D	C0	0.338074	0.922	0.768	3.66747e-42	7.10168e-38
PRAG1	C0	0.315577	0.718	0.286	4.59279e-42	8.89348e-38
TMEM179B	C0	0.389557	0.953	0.84	4.69644e-42	9.09418e-38
PDLIM2	C0	0.532728	0.894	0.599	5.3753e-42	1.04087e-37
PMAIP1	C0	0.485463	0.733	0.358	5.60026e-42	1.08443e-37
PDLIM4	C0	0.270903	0.749	0.36	6.33801e-42	1.22729e-37
RPL39	C0	0.41269	1	1	6.92264e-42	1.3405e-37
NUTF2	C0	0.43767	0.996	0.972	7.44398e-42	1.44145e-37
ARL4D	C0	0.426152	0.78	0.426	7.92994e-42	1.53555e-37
PHF5A	C0	0.318151	0.929	0.711	8.07148e-42	1.56296e-37
KLHL5	C0	0.272208	0.843	0.476	9.68447e-42	1.8753e-37
ODC1	C0	0.638992	0.996	0.98	1.04453e-41	2.02263e-37
SSR3	C0	0.589041	1	0.995	1.06858e-41	2.0692e-37
P4HB	C0	0.640112	1	0.992	1.09126e-41	2.11312e-37
SLC25A1	C0	0.488489	0.973	0.938	1.17525e-41	2.27575e-37
LIMCH1	C0	0.418764	0.694	0.262	1.70804e-41	3.30744e-37
MAP1LC3A	C0	0.522869	0.91	0.706	2.01278e-41	3.89754e-37
TMEM258	C0	0.415888	0.996	0.994	2.51197e-41	4.86418e-37
IKBIP	C0	0.30631	0.839	0.456	3.21425e-41	6.22407e-37
MSN	C0	0.496299	0.957	0.853	4.55638e-41	8.82297e-37
RPS25	C0	0.437272	1	1	4.60419e-41	8.91556e-37
MT2A	C0	0.448057	0.51	0.143	4.87354e-41	9.43713e-37
PSMD8	C0	0.470786	0.992	0.987	5.41078e-41	1.04774e-36
RPL27A	C0	0.384663	1	1	5.54719e-41	1.07416e-36
SPCS2	C0	0.549613	0.984	0.96	7.19657e-41	1.39354e-36
HSP90AB1	C0	0.654457	1	1	1.15009e-40	2.22703e-36
PNP	C0	0.398755	0.839	0.458	1.21122e-40	2.34541e-36
LSM8	C0	0.506071	0.973	0.929	1.26018e-40	2.44022e-36
LOXL1	C0	0.442332	0.702	0.326	2.31048e-40	4.47401e-36
CKAP4	C0	0.523308	0.973	0.94	2.58432e-40	5.00428e-36
SEC24D	C0	0.339586	0.898	0.582	2.58644e-40	5.00838e-36
HOXB4	C0	0.350389	0.757	0.329	3.44893e-40	6.67851e-36
FNBP1L	C0	0.395356	0.886	0.616	4.21968e-40	8.171e-36
VASN	C0	0.262288	0.706	0.308	7.12295e-40	1.37929e-35
RPS24	C0	0.374328	1	1	7.66403e-40	1.48406e-35
RPS13	C0	0.395732	1	1	7.68373e-40	1.48788e-35
TGFBR1	C0	0.31769	0.82	0.491	8.01589e-40	1.5522e-35
LMAN1	C0	0.472527	0.984	0.899	1.02829e-39	1.99117e-35
EEF1A1	C0	0.54048	1	1	1.20958e-39	2.34223e-35
ERG28	C0	0.623793	0.98	0.904	1.26117e-39	2.44214e-35
IL6ST	C0	0.60942	0.984	0.866	1.30911e-39	2.53496e-35
IFITM2	C0	0.570081	0.929	0.799	1.31632e-39	2.54893e-35
TMEM165	C0	0.390259	0.953	0.825	1.58771e-39	3.07444e-35
PGD	C0	0.485174	0.98	0.973	2.15227e-39	4.16765e-35
GOLM1	C0	0.397366	0.953	0.829	2.16674e-39	4.19568e-35
FLRT2	C0	0.508343	0.761	0.388	2.22554e-39	4.30954e-35
UPP1	C0	0.771869	0.882	0.66	2.39685e-39	4.64127e-35
PRAF2	C0	0.337924	0.914	0.745	3.23042e-39	6.25539e-35
KXD1	C0	0.330514	0.969	0.882	3.69332e-39	7.15174e-35
PPA1	C0	0.442586	0.992	0.972	3.96763e-39	7.68291e-35
RPS15	C0	0.350384	1	1	4.05391e-39	7.84999e-35
RABAC1	C0	0.456551	0.973	0.985	4.20955e-39	8.15138e-35
TPM2	C0	1.02498	0.992	0.991	4.43086e-39	8.57993e-35
PDLIM7	C0	0.655085	0.992	0.976	5.66459e-39	1.09689e-34
FKBP14	C0	0.333859	0.851	0.527	6.10852e-39	1.18285e-34
SNCG	C0	0.348257	0.592	0.204	6.61141e-39	1.28023e-34
PSMG1	C0	0.331647	0.922	0.709	1.22126e-38	2.36484e-34
SEC61G	C0	0.580853	0.996	0.993	1.41178e-38	2.73377e-34
PON2	C0	0.37454	0.953	0.803	1.86128e-38	3.60418e-34
FAM107B	C0	0.310791	0.839	0.45	1.91279e-38	3.70393e-34
ADGRG6	C0	0.31042	0.718	0.339	4.41449e-38	8.54822e-34
VKORC1	C0	0.387924	0.969	0.912	4.64178e-38	8.98835e-34
CLU	C0	0.440693	0.725	0.381	5.04771e-38	9.77438e-34
UGCG	C0	0.592209	0.855	0.576	5.76995e-38	1.11729e-33
CNPY3	C0	0.315731	0.922	0.772	7.693e-38	1.48967e-33
TGFB2	C0	0.335427	0.753	0.36	7.82786e-38	1.51579e-33
NACA	C0	0.390056	1	1	9.91342e-38	1.91963e-33
CYTOR	C0	0.719124	0.863	0.562	1.02094e-37	1.97695e-33
ARHGDIA	C0	0.446667	0.996	0.948	1.17903e-37	2.28307e-33
GNL1	C0	0.264239	0.89	0.557	1.47845e-37	2.86288e-33
TMX1	C0	0.275033	0.863	0.562	1.56198e-37	3.02461e-33
FAM89A	C0	0.284126	0.753	0.413	1.81026e-37	3.50539e-33
LAMTOR1	C0	0.34148	1	0.986	1.89654e-37	3.67247e-33
MXD4	C0	0.406495	0.933	0.696	2.10385e-37	4.0739e-33
HNRNPA0	C0	0.432681	0.984	0.984	4.0653e-37	7.87204e-33
ERRFI1	C0	0.333603	0.702	0.329	4.84365e-37	9.37925e-33
MESD	C0	0.371827	0.969	0.909	4.99227e-37	9.66704e-33
HOMER3	C0	0.362368	0.933	0.785	5.0284e-37	9.73699e-33
SNHG7	C0	0.834557	0.98	0.927	5.42598e-37	1.05069e-32
CLNS1A	C0	0.351445	0.969	0.925	7.40326e-37	1.43357e-32
MYL12A	C0	0.723796	1	0.994	7.42967e-37	1.43868e-32
BCAP31	C0	0.358921	0.996	0.968	8.24832e-37	1.5972e-32
HSBP1	C0	0.364205	0.996	0.993	9.54028e-37	1.84738e-32
VASP	C0	0.440208	0.953	0.788	1.03579e-36	2.00571e-32
ALG5	C0	0.336543	0.886	0.611	1.06921e-36	2.07042e-32
PSMA4	C0	0.373538	0.988	0.977	1.12423e-36	2.17696e-32
CFAP36	C0	0.358217	0.957	0.735	1.14119e-36	2.2098e-32
UBXN1	C0	0.419833	0.992	0.972	1.28018e-36	2.47894e-32
UBE2V2	C0	0.349981	0.98	0.929	1.54372e-36	2.98927e-32
SAT1	C0	0.661864	0.882	0.689	1.57033e-36	3.04079e-32
RNASEK	C0	0.394927	0.992	0.998	1.68927e-36	3.2711e-32
SELENOH	C0	0.425756	1	0.998	1.81602e-36	3.51654e-32
RPL7	C0	0.365132	1	1	1.90028e-36	3.67971e-32
PLS3	C0	0.516613	0.937	0.835	2.34964e-36	4.54984e-32
PABPC1	C0	0.479502	1	1	2.41585e-36	4.67805e-32
GNG11	C0	0.550927	0.416	0.098	2.59132e-36	5.01783e-32
NTRK2	C0	0.391835	0.42	0.101	2.9153e-36	5.64518e-32
ARHGEF40	C0	0.288714	0.8	0.428	3.35746e-36	6.50139e-32
MPZL1	C0	0.353828	0.949	0.832	3.63752e-36	7.0437e-32
TSPAN14	C0	0.264043	0.851	0.502	5.94711e-36	1.1516e-31
P4HA1	C0	0.277352	0.843	0.557	6.53341e-36	1.26513e-31
TLE4	C0	0.27837	0.725	0.337	6.55936e-36	1.27015e-31
FAF2	C0	0.312727	0.937	0.77	6.63245e-36	1.28431e-31
CCDC80	C0	0.567187	0.769	0.389	8.7514e-36	1.69462e-31
AUP1	C0	0.376394	0.976	0.927	8.9228e-36	1.72781e-31
BCL7C	C0	0.402663	0.976	0.918	9.26351e-36	1.79379e-31
TAC1	C0	0.292525	0.42	0.106	9.67479e-36	1.87343e-31
PLTP	C0	0.487075	0.894	0.702	1.21575e-35	2.35418e-31
EIF3I	C0	0.363738	0.988	0.985	1.2422e-35	2.40541e-31
OLFML3	C0	0.318348	0.663	0.291	1.39919e-35	2.7094e-31
MFGE8	C0	0.868456	0.98	0.924	1.41567e-35	2.7413e-31
PHAX	C0	0.303394	0.937	0.755	1.54172e-35	2.98538e-31
FRMD6	C0	0.311318	0.576	0.215	1.5634e-35	3.02738e-31
CCT8	C0	0.411436	0.992	0.99	1.62538e-35	3.14738e-31
ADGRA2	C0	0.342142	0.765	0.43	1.71352e-35	3.31805e-31
SUPT4H1	C0	0.349293	0.98	0.945	1.92985e-35	3.73696e-31
LSM5	C0	0.418359	0.988	0.92	1.96866e-35	3.81211e-31
GLT8D1	C0	0.270636	0.894	0.673	2.06725e-35	4.00302e-31
SELENOS	C0	0.463316	0.988	0.932	2.07341e-35	4.01495e-31
EIF3E	C0	0.525175	0.996	0.995	2.07485e-35	4.01773e-31
PSMA3	C0	0.408135	0.969	0.953	2.53692e-35	4.91249e-31
PFN2	C0	0.487783	0.965	0.963	2.57772e-35	4.9915e-31
GNPDA1	C0	0.348818	0.898	0.732	3.0211e-35	5.85005e-31
COL5A1	C0	0.660903	0.851	0.633	3.2061e-35	6.2083e-31
TRAPPC2L	C0	0.364528	0.965	0.911	3.43272e-35	6.64711e-31
GOLT1B	C0	0.286926	0.843	0.522	3.59427e-35	6.95994e-31
IP6K2	C0	0.330842	0.906	0.741	3.82942e-35	7.41529e-31
TXNDC12	C0	0.325038	0.929	0.787	4.60821e-35	8.92333e-31
IMPDH2	C0	0.467159	0.973	0.944	5.14897e-35	9.97047e-31
PFDN1	C0	0.443058	0.984	0.959	6.72882e-35	1.30297e-30
ACTR2	C0	0.458976	0.984	0.962	6.88004e-35	1.33225e-30
DTD1	C0	0.411155	0.929	0.798	7.70246e-35	1.4915e-30
TMEM219	C0	0.340374	0.965	0.931	8.24521e-35	1.5966e-30
JUN	C0	0.815588	0.918	0.701	8.86393e-35	1.71641e-30
ZYX	C0	0.528211	0.988	0.921	9.50149e-35	1.83987e-30
DEGS1	C0	0.328757	0.914	0.785	1.00938e-34	1.95456e-30
SLBP	C0	0.322406	0.941	0.758	1.34479e-34	2.60405e-30
TXNDC17	C0	0.486366	0.992	0.983	1.88548e-34	3.65104e-30
MPV17	C0	0.304822	0.922	0.795	1.95509e-34	3.78584e-30
MRPS2	C0	0.334343	0.976	0.884	2.31456e-34	4.48192e-30
RSL1D1	C0	0.44512	0.988	0.978	3.34184e-34	6.47114e-30
SUMF2	C0	0.288891	0.914	0.703	3.50111e-34	6.77956e-30
KNOP1	C0	0.328893	0.902	0.724	3.55686e-34	6.8875e-30
TM9SF3	C0	0.328884	0.992	0.94	4.35214e-34	8.42748e-30
PSMA5	C0	0.368856	0.984	0.959	4.83936e-34	9.37094e-30
PRPF40A	C0	0.37483	0.996	0.984	5.78339e-34	1.1199e-29
RNF145	C0	0.340305	0.871	0.653	5.80316e-34	1.12372e-29
H2AFZ	C0	0.668408	0.996	0.998	6.48663e-34	1.25607e-29
TRAPPC5	C0	0.360896	0.992	0.985	7.09412e-34	1.3737e-29
RND3	C0	0.576522	0.816	0.498	7.16516e-34	1.38746e-29
SEPTIN7	C0	0.460042	1	0.997	7.30781e-34	1.41508e-29
GAL	C0	0.273689	0.439	0.126	8.36291e-34	1.61939e-29
SPCS1	C0	0.381996	0.988	0.983	1.25875e-33	2.43743e-29
MEAF6	C0	0.293659	0.945	0.85	1.27404e-33	2.46705e-29
RPS20	C0	0.329596	0.996	1	1.33846e-33	2.5918e-29
CD9	C0	0.296919	0.475	0.144	1.36911e-33	2.65114e-29
SRP72	C0	0.337427	0.98	0.965	1.65538e-33	3.20547e-29
PTMS	C0	0.463601	0.996	0.997	1.71067e-33	3.31255e-29
LITAF	C0	0.415059	0.933	0.765	1.77441e-33	3.43596e-29
NEU1	C0	0.452792	0.969	0.873	2.35509e-33	4.5604e-29
PHF14	C0	0.318678	0.945	0.807	2.55278e-33	4.9432e-29
RPS27	C0	0.428844	1	1	2.70745e-33	5.24271e-29
SEMA6A	C0	0.269765	0.624	0.253	2.96003e-33	5.73181e-29
TSEN34	C0	0.319038	0.965	0.916	3.16586e-33	6.13036e-29
MED10	C0	0.416746	0.937	0.767	3.19232e-33	6.18161e-29
TRAM1	C0	0.409849	0.973	0.908	3.24755e-33	6.28856e-29
LRRC8A	C0	0.332379	0.843	0.568	3.40677e-33	6.59688e-29
TAF1D	C0	0.478894	0.98	0.924	3.45788e-33	6.69584e-29
MZT2B	C0	0.401474	0.992	0.997	4.38494e-33	8.491e-29
CREB3L1	C0	0.350237	0.875	0.671	5.75601e-33	1.11459e-28
SKP1	C0	0.390149	1	0.996	5.86665e-33	1.13602e-28
P4HA2	C0	0.478335	0.859	0.633	8.48075e-33	1.64221e-28
FSCN1	C0	0.525445	0.984	0.976	1.18429e-32	2.29326e-28
GTF2E2	C0	0.26806	0.91	0.731	1.18595e-32	2.29647e-28
RAC3	C0	0.338705	0.914	0.788	1.353e-32	2.61995e-28
CNIH4	C0	0.380797	0.973	0.882	1.58174e-32	3.06289e-28
RSL24D1	C0	0.389878	0.988	0.971	1.69612e-32	3.28436e-28
YIF1A	C0	0.41001	0.973	0.95	1.73031e-32	3.35057e-28
RPLP2	C0	0.327153	1	1	1.81151e-32	3.50781e-28
ATP6V0E1	C0	0.415548	0.988	0.984	1.85336e-32	3.58885e-28
CDC37	C0	0.370931	0.98	0.959	2.03774e-32	3.94587e-28
SLC50A1	C0	0.276078	0.871	0.621	2.11141e-32	4.08853e-28
TSPAN5	C0	0.290178	0.796	0.468	2.43145e-32	4.70826e-28
RPL38	C0	0.323931	1	0.999	2.61363e-32	5.06104e-28
SPATS2L	C0	0.53834	0.973	0.902	4.31593e-32	8.35736e-28
VAPA	C0	0.353872	0.992	0.989	4.43388e-32	8.58577e-28
SURF4	C0	0.349393	0.988	0.936	4.48415e-32	8.68312e-28
GULP1	C0	0.347372	0.882	0.631	4.77641e-32	9.24904e-28
SEC61A1	C0	0.425229	0.996	0.938	4.78463e-32	9.26495e-28
CAPN2	C0	0.454196	0.969	0.922	4.91894e-32	9.52503e-28
JUNB	C0	0.461285	0.706	0.363	4.98426e-32	9.65152e-28
MYH9	C0	0.838046	0.973	0.944	5.11939e-32	9.91318e-28
SLC52A2	C0	0.327391	0.933	0.799	6.52471e-32	1.26345e-27
GUK1	C0	0.418415	1	0.996	9.11697e-32	1.76541e-27
SHC1	C0	0.355132	0.957	0.859	1.02387e-31	1.98262e-27
HNRNPA1	C0	0.596791	0.996	0.998	1.29217e-31	2.50216e-27
GLUL	C0	0.355312	0.949	0.836	1.35066e-31	2.61541e-27
DAP	C0	0.315203	0.961	0.89	1.95764e-31	3.79078e-27
PELO	C0	0.426362	0.902	0.687	2.30506e-31	4.46352e-27
SPCS3	C0	0.399675	0.984	0.879	2.33983e-31	4.53085e-27
HSPA5	C0	1.06107	0.992	0.973	2.96323e-31	5.738e-27
PSMG2	C0	0.272052	0.945	0.836	4.81268e-31	9.31928e-27
KRT8	C0	1.04096	0.988	0.999	5.0597e-31	9.7976e-27
MYO10	C0	0.278681	0.737	0.4	5.48424e-31	1.06197e-26
BSG	C0	0.364593	1	0.992	5.53068e-31	1.07096e-26
EIF4A2	C0	0.526543	0.992	0.994	6.62963e-31	1.28376e-26
YES1	C0	0.257502	0.906	0.624	8.30085e-31	1.60738e-26
IGFBP3	C0	1.67357	0.769	0.535	1.14138e-30	2.21016e-26
XRN2	C0	0.316186	0.98	0.944	1.25725e-30	2.43453e-26
SSR4	C0	0.447223	0.996	0.994	1.37624e-30	2.66495e-26
RPL35	C0	0.334484	1	1	1.43603e-30	2.78072e-26
PDCD2	C0	0.31661	0.988	0.949	1.69116e-30	3.27477e-26
YIPF2	C0	0.263326	0.89	0.724	1.70455e-30	3.30069e-26
DNAJC9	C0	0.316747	0.906	0.615	1.70663e-30	3.30472e-26
BFAR	C0	0.277462	0.937	0.831	1.81502e-30	3.5146e-26
ZNF580	C0	0.334701	0.965	0.924	2.00254e-30	3.87772e-26
PDIA4	C0	0.631833	0.961	0.849	2.01965e-30	3.91085e-26
HYAL2	C0	0.362792	0.882	0.761	2.74459e-30	5.31462e-26
SMIM14	C0	0.274607	0.847	0.558	2.7537e-30	5.33226e-26
SF3B2	C0	0.309073	1	0.98	2.88645e-30	5.58932e-26
HDAC1	C0	0.268271	0.886	0.711	2.90337e-30	5.62209e-26
TSTA3	C0	0.283981	0.933	0.821	3.32051e-30	6.42984e-26
RPL36AL	C0	0.357965	0.996	0.996	4.0387e-30	7.82055e-26
RPL8	C0	0.336143	1	1	4.25969e-30	8.24846e-26
SNHG32	C0	0.490318	1	0.982	4.84355e-30	9.37906e-26
LSM2	C0	0.306271	0.969	0.894	5.58305e-30	1.0811e-25
CALR	C0	0.940076	1	0.988	6.44599e-30	1.2482e-25
DNAJC1	C0	0.372567	0.957	0.853	6.58456e-30	1.27503e-25
C20orf27	C0	0.255968	0.886	0.684	6.71193e-30	1.2997e-25
RPP21	C0	0.296691	0.957	0.86	6.72342e-30	1.30192e-25
CBX1	C0	0.349911	0.973	0.9	6.7808e-30	1.31303e-25
SF3B6	C0	0.383513	0.992	0.986	7.79503e-30	1.50943e-25
C1orf21	C0	0.370401	0.839	0.595	8.33407e-30	1.61381e-25
HMGA1	C0	0.891457	0.996	0.984	8.55233e-30	1.65607e-25
TXNDC9	C0	0.255696	0.933	0.802	1.01195e-29	1.95954e-25
GNG12	C0	0.376583	0.969	0.846	1.07063e-29	2.07316e-25
MBOAT7	C0	0.279138	0.918	0.732	1.22281e-29	2.36785e-25
RPLP0	C0	0.373219	1	1	1.36467e-29	2.64255e-25
CD99	C0	0.415538	0.996	0.993	1.44019e-29	2.78878e-25
SDF2	C0	0.255962	0.929	0.745	1.57701e-29	3.05372e-25
SYF2	C0	0.307613	0.973	0.912	1.72038e-29	3.33135e-25
CREB5	C0	0.276419	0.659	0.297	2.18124e-29	4.22376e-25
RRAS	C0	0.409013	0.937	0.801	2.21979e-29	4.2984e-25
COPB1	C0	0.340584	0.976	0.95	2.8449e-29	5.50886e-25
STMN1	C0	0.606849	0.996	0.991	2.95624e-29	5.72445e-25
STMP1	C0	0.301087	0.992	0.985	2.98835e-29	5.78665e-25
TGIF1	C0	0.395915	0.875	0.672	3.2992e-29	6.38857e-25
ID3	C0	1.03448	0.804	0.528	3.99244e-29	7.73095e-25
KIF2A	C0	0.263058	0.925	0.713	4.62611e-29	8.958e-25
SQLE	C0	0.618358	0.988	0.961	5.44414e-29	1.0542e-24
CRABP2	C0	1.0433	0.933	0.812	6.17802e-29	1.19631e-24
PSMB5	C0	0.339358	0.992	0.99	6.63611e-29	1.28502e-24
TAGLN	C0	1.33273	0.984	0.924	6.76104e-29	1.30921e-24
POLR1D	C0	0.319675	0.992	0.983	8.12832e-29	1.57397e-24
SYPL1	C0	0.304801	0.949	0.851	8.20576e-29	1.58896e-24
TPRKB	C0	0.297764	0.937	0.783	8.21244e-29	1.59026e-24
CCT6A	C0	0.362594	0.996	0.993	8.97297e-29	1.73753e-24
SSR1	C0	0.361434	0.973	0.921	9.15539e-29	1.77285e-24
HSPB11	C0	0.271887	0.875	0.639	9.53563e-29	1.84648e-24
FNDC3A	C0	0.311941	0.949	0.856	9.66734e-29	1.87198e-24
LAMP2	C0	0.274471	0.922	0.775	1.22524e-28	2.37256e-24
SNHG29	C0	0.434895	1	0.999	1.31192e-28	2.54039e-24
POLR2K	C0	0.322429	0.961	0.894	1.42246e-28	2.75444e-24
HNRNPF	C0	0.34477	0.976	0.965	1.47265e-28	2.85164e-24
SDCBP	C0	0.376881	0.976	0.949	1.48165e-28	2.86906e-24
SEC11C	C0	0.458892	0.933	0.767	1.63183e-28	3.15988e-24
TUBB	C0	0.585222	1	0.998	1.70906e-28	3.30942e-24
ATP2C1	C0	0.398772	0.961	0.836	1.96624e-28	3.80744e-24
ACTN1	C0	0.777818	0.969	0.955	2.13077e-28	4.12603e-24
ECE1	C0	0.332592	0.871	0.644	2.64469e-28	5.12118e-24
MANF	C0	0.620263	0.996	0.92	2.67354e-28	5.17705e-24
RPL23A	C0	0.328838	1	1	2.98715e-28	5.78431e-24
RBIS	C0	0.297544	0.98	0.961	3.51829e-28	6.81283e-24
PLPPR3	C0	0.319417	0.804	0.563	3.98925e-28	7.72478e-24
TSPAN3	C0	0.299774	0.992	0.966	4.49191e-28	8.69814e-24
HEY1	C0	0.644561	0.698	0.39	4.66768e-28	9.0385e-24
CCDC3	C0	0.688922	0.824	0.592	4.89956e-28	9.48752e-24
MTCH1	C0	0.328674	0.992	0.995	4.91061e-28	9.50891e-24
NOB1	C0	0.258304	0.918	0.724	5.96262e-28	1.1546e-23
XRCC5	C0	0.365788	0.992	0.987	6.18441e-28	1.19755e-23
FZD2	C0	0.471154	0.925	0.848	6.68774e-28	1.29501e-23
PLPP5	C0	0.273232	0.859	0.629	7.10714e-28	1.37623e-23
TSPAN4	C0	0.269523	0.91	0.729	9.00885e-28	1.74447e-23
SEPTIN11	C0	0.475029	0.961	0.951	9.05895e-28	1.75418e-23
ITPRID2	C0	0.415638	0.757	0.497	9.44956e-28	1.82981e-23
PARK7	C0	0.316182	0.996	0.992	9.51142e-28	1.84179e-23
DDRGK1	C0	0.276522	0.918	0.76	9.61434e-28	1.86172e-23
SCARB2	C0	0.278578	0.953	0.894	9.84359e-28	1.90611e-23
HP1BP3	C0	0.326119	0.976	0.922	1.06365e-27	2.05964e-23
PTPRF	C0	0.426764	0.859	0.689	1.08275e-27	2.09664e-23
RHOB	C0	0.36754	0.761	0.435	1.11291e-27	2.15504e-23
EI24	C0	0.292907	0.988	0.983	1.16243e-27	2.25093e-23
CCN2	C0	1.88252	0.773	0.567	1.19789e-27	2.31959e-23
MYLK	C0	0.553381	0.396	0.118	1.38688e-27	2.68555e-23
POLR2G	C0	0.295735	0.965	0.953	1.59818e-27	3.09472e-23
DYNLL1	C0	0.386022	0.996	1	1.96848e-27	3.81177e-23
CETN2	C0	0.344129	0.953	0.863	2.02429e-27	3.91984e-23
C19orf48	C0	0.309738	0.894	0.755	2.11937e-27	4.10394e-23
THRAP3	C0	0.383393	0.98	0.947	2.16371e-27	4.1898e-23
SUB1	C0	0.40517	0.996	0.995	2.52558e-27	4.89053e-23
ITGA5	C0	0.294674	0.855	0.649	2.66605e-27	5.16255e-23
PSMD2	C0	0.376093	1	0.989	2.99895e-27	5.80716e-23
KIF5B	C0	0.372423	0.996	0.991	3.04673e-27	5.8997e-23
DPYSL2	C0	0.373618	0.882	0.721	3.3363e-27	6.46041e-23
RPL27	C0	0.270721	1	1	3.53802e-27	6.85102e-23
MYC	C0	0.432663	0.816	0.507	4.32042e-27	8.36606e-23
UBE2N	C0	0.317469	0.973	0.913	4.34586e-27	8.41532e-23
DUSP1	C0	0.588212	0.675	0.377	5.09672e-27	9.86929e-23
HES6	C0	0.488017	0.761	0.481	5.4728e-27	1.05975e-22
FRZB	C0	0.460362	0.357	0.1	5.7438e-27	1.11223e-22
RPS27L	C0	0.448282	0.976	0.956	5.75542e-27	1.11448e-22
WASF2	C0	0.331062	0.984	0.963	5.79517e-27	1.12218e-22
KLF6	C0	0.686513	0.914	0.782	6.08184e-27	1.17769e-22
PPIA	C0	0.341085	1	1	6.48854e-27	1.25644e-22
SMARCC1	C0	0.338323	0.984	0.974	7.13844e-27	1.38229e-22
GABARAP	C0	0.307041	1	0.998	8.96195e-27	1.73539e-22
JAGN1	C0	0.294653	0.949	0.853	9.36989e-27	1.81439e-22
FKBP10	C0	0.388686	0.949	0.911	9.38684e-27	1.81767e-22
HMGA2	C0	0.563716	0.8	0.55	9.39472e-27	1.81919e-22
YWHAB	C0	0.348905	1	1	1.02742e-26	1.9895e-22
RPL41	C0	0.304691	1	1	1.09258e-26	2.11567e-22
RPS6KB2	C0	0.270302	0.929	0.783	1.15454e-26	2.23566e-22
SET	C0	0.370145	1	1	1.35249e-26	2.61897e-22
TMEM230	C0	0.315708	0.992	0.978	1.4616e-26	2.83024e-22
GNB2	C0	0.312265	0.992	0.986	1.83721e-26	3.55758e-22
TPGS2	C0	0.269409	0.937	0.827	1.87712e-26	3.63485e-22
ADSS	C0	0.260137	0.902	0.691	2.13218e-26	4.12875e-22
RALA	C0	0.342223	0.965	0.875	2.68833e-26	5.20569e-22
YRDC	C0	0.25822	0.875	0.621	3.13047e-26	6.06184e-22
MYRF	C0	0.337505	0.855	0.637	3.59989e-26	6.97083e-22
PSMB3	C0	0.334283	0.984	0.974	3.87344e-26	7.50053e-22
METTL9	C0	0.297159	0.984	0.994	4.74808e-26	9.19418e-22
TMEM50A	C0	0.314615	0.976	0.962	5.23907e-26	1.01449e-21
BCAT1	C0	0.47704	0.973	0.844	5.86215e-26	1.13515e-21
DPM2	C0	0.259691	0.929	0.769	6.80856e-26	1.31841e-21
VAT1	C0	0.373641	0.973	0.964	8.21255e-26	1.59028e-21
PPP1R14B	C0	0.505794	0.996	0.996	9.36353e-26	1.81315e-21
RBCK1	C0	0.297133	0.941	0.866	9.57209e-26	1.85354e-21
MEA1	C0	0.29363	0.98	0.947	9.62241e-26	1.86328e-21
NOP10	C0	0.333878	0.992	0.994	1.00171e-25	1.9397e-21
PTBP3	C0	0.273231	0.851	0.585	1.02742e-25	1.98949e-21
KIFC3	C0	0.265651	0.796	0.525	1.21829e-25	2.3591e-21
RPS11	C0	0.280982	1	1	1.33315e-25	2.5815e-21
PSMA6	C0	0.326247	0.98	0.988	1.54832e-25	2.99817e-21
AC027031.2	C0	0.267935	0.565	0.252	1.59451e-25	3.08761e-21
CERS2	C0	0.280528	0.941	0.869	1.69248e-25	3.27731e-21
RFTN1	C0	0.36152	0.91	0.67	1.90186e-25	3.68276e-21
ADH5	C0	0.296698	0.992	0.977	1.95581e-25	3.78723e-21
CHSY1	C0	0.273831	0.808	0.57	2.02189e-25	3.91519e-21
VPS25	C0	0.277902	0.941	0.92	2.3965e-25	4.64057e-21
PGM3	C0	0.323382	0.925	0.804	2.50482e-25	4.85032e-21
CST3	C0	0.338448	0.992	0.988	2.99841e-25	5.80613e-21
LMAN2	C0	0.311492	0.965	0.967	3.30113e-25	6.39232e-21
SNF8	C0	0.307274	0.992	0.982	3.46453e-25	6.70872e-21
SLC44A1	C0	0.264494	0.604	0.272	3.93248e-25	7.61485e-21
SOX9	C0	0.394624	0.557	0.252	4.00619e-25	7.75758e-21
IL13RA1	C0	0.269329	0.741	0.458	4.04231e-25	7.82752e-21
HMGB1	C0	0.52152	1	0.999	4.38443e-25	8.49002e-21
TOP1	C0	0.391746	0.976	0.964	4.84954e-25	9.39066e-21
YWHAQ	C0	0.305848	1	0.998	4.96321e-25	9.61077e-21
FUCA2	C0	0.289854	0.839	0.674	4.99117e-25	9.66491e-21
SORBS3	C0	0.318285	0.945	0.847	5.04149e-25	9.76235e-21
DNAJC8	C0	0.315736	0.996	0.985	5.55515e-25	1.0757e-20
RARS	C0	0.285899	0.976	0.94	6.34002e-25	1.22768e-20
NME1	C0	0.439362	0.988	0.974	6.82308e-25	1.32122e-20
SPRY1	C0	0.372942	0.573	0.278	8.97635e-25	1.73818e-20
MTDH	C0	0.37842	0.992	0.986	9.24254e-25	1.78973e-20
EIF3H	C0	0.288157	0.996	0.998	9.28066e-25	1.79711e-20
RBM8A	C0	0.358119	0.992	0.982	1.20596e-24	2.33521e-20
IGFBP5	C0	1.93917	0.765	0.579	1.22018e-24	2.36276e-20
GLOD4	C0	0.255205	0.941	0.82	1.24898e-24	2.41852e-20
TUBA1A	C0	0.844079	0.976	0.986	1.28815e-24	2.49438e-20
SNRPB2	C0	0.330435	0.973	0.961	1.41293e-24	2.736e-20
TMEM160	C0	0.319977	0.973	0.904	1.54792e-24	2.99739e-20
ADRM1	C0	0.325879	0.988	0.968	2.0395e-24	3.94929e-20
HMGCR	C0	0.480976	0.973	0.888	2.35424e-24	4.55876e-20
ERH	C0	0.345218	0.996	0.996	2.44167e-24	4.72805e-20
STRAP	C0	0.327174	0.992	0.993	2.64076e-24	5.11356e-20
JPT1	C0	0.467334	0.98	0.968	2.90069e-24	5.6169e-20
COL5A2	C0	0.561176	0.961	0.748	5.13675e-24	9.94681e-20
SNRPD2	C0	0.281471	0.992	0.993	5.18864e-24	1.00473e-19
RPL4	C0	0.317137	0.996	1	6.2811e-24	1.21627e-19
GNL3	C0	0.329219	0.949	0.861	6.32238e-24	1.22427e-19
PFDN4	C0	0.26456	0.965	0.921	8.2068e-24	1.58917e-19
AHNAK	C0	0.430951	0.918	0.786	8.27223e-24	1.60184e-19
FAM32A	C0	0.262678	0.965	0.911	8.75757e-24	1.69581e-19
PRDX6	C0	0.420905	0.996	1	9.30337e-24	1.80151e-19
SCAND1	C0	0.305732	0.996	0.986	1.02501e-23	1.98483e-19
CRK	C0	0.313891	0.953	0.888	1.0894e-23	2.10952e-19
SFT2D1	C0	0.25518	0.957	0.838	1.11467e-23	2.15845e-19
EAPP	C0	0.297677	0.898	0.83	1.28285e-23	2.4841e-19
BAZ1A	C0	0.269435	0.867	0.666	1.38144e-23	2.67502e-19
HNRNPR	C0	0.37686	0.988	0.977	1.55378e-23	3.00875e-19
COPZ1	C0	0.283496	0.973	0.973	1.72367e-23	3.33771e-19
ENO1	C0	0.47144	0.996	0.995	2.13739e-23	4.13885e-19
PXDC1	C0	0.343095	0.8	0.54	2.64621e-23	5.12412e-19
CDC34	C0	0.28966	0.988	0.962	3.09741e-23	5.99783e-19
CKS2	C0	0.354789	0.804	0.53	4.03745e-23	7.81812e-19
NIFK	C0	0.292469	0.969	0.881	4.22501e-23	8.18131e-19
ENY2	C0	0.318039	0.984	0.966	4.57059e-23	8.85049e-19
PSMD13	C0	0.270871	0.969	0.929	4.67186e-23	9.04659e-19
C17orf49	C0	0.284838	0.957	0.915	5.13956e-23	9.95224e-19
CDH11	C0	0.618477	0.776	0.555	5.85821e-23	1.13438e-18
YIPF5	C0	0.30115	0.957	0.872	6.46188e-23	1.25128e-18
GSTO1	C0	0.372657	0.98	0.951	6.90481e-23	1.33705e-18
RPL21	C0	0.256959	1	1	8.351e-23	1.61709e-18
TNNT1	C0	0.292359	0.671	0.364	1.05596e-22	2.04476e-18
PAFAH1B3	C0	0.306582	0.961	0.892	1.1185e-22	2.16586e-18
TMBIM4	C0	0.307887	0.847	0.657	1.18421e-22	2.29311e-18
RNF7	C0	0.30283	1	0.997	1.18678e-22	2.29807e-18
SIVA1	C0	0.26861	0.984	0.962	1.19259e-22	2.30933e-18
PPIL4	C0	0.251205	0.922	0.805	1.39127e-22	2.69406e-18
DNAJB1	C0	0.568299	0.906	0.716	1.57784e-22	3.05533e-18
IDS	C0	0.2564	0.882	0.719	1.59116e-22	3.08112e-18
EEF1B2	C0	0.337131	1	1	1.72833e-22	3.34674e-18
DNAJB11	C0	0.413224	0.984	0.895	1.8831e-22	3.64644e-18
PSMC4	C0	0.296245	0.973	0.956	1.91659e-22	3.71129e-18
SRM	C0	0.456296	0.996	0.969	2.09486e-22	4.05649e-18
BSCL2	C0	0.372648	0.929	0.852	2.24913e-22	4.35521e-18
FEZ2	C0	0.268932	0.922	0.833	2.28169e-22	4.41826e-18
SDC2	C0	0.388583	0.894	0.775	2.38943e-22	4.62689e-18
DNAJA1	C0	0.551614	0.988	0.981	2.62232e-22	5.07786e-18
CD164	C0	0.262192	0.988	0.977	2.96e-22	5.73175e-18
JTB	C0	0.360016	0.996	0.989	3.08417e-22	5.9722e-18
SNCA	C0	0.345303	0.91	0.788	3.14496e-22	6.0899e-18
ACP1	C0	0.267216	0.984	0.972	3.95936e-22	7.6669e-18
FAM177A1	C0	0.304708	0.969	0.927	4.20369e-22	8.14003e-18
GYPC	C0	0.484806	0.996	0.957	4.64235e-22	8.98945e-18
MCRIP1	C0	0.257647	0.976	0.958	4.93728e-22	9.56055e-18
MAGED2	C0	0.495335	0.984	0.991	5.28228e-22	1.02286e-17
NCL	C0	0.404334	0.996	0.999	5.46976e-22	1.05916e-17
RPS23	C0	0.280308	1	1	8.65637e-22	1.67622e-17
NOP53	C0	0.315774	0.992	0.987	1.00725e-21	1.95044e-17
EMC4	C0	0.278352	0.973	0.938	1.08738e-21	2.1056e-17
MAL2	C0	0.269129	0.404	0.147	1.12781e-21	2.18389e-17
BNIP3L	C0	0.253688	0.941	0.903	1.20297e-21	2.32944e-17
KRT18	C0	1.23419	0.984	0.998	1.58802e-21	3.07505e-17
WTAP	C0	0.25604	0.949	0.889	1.66468e-21	3.22348e-17
DCAF13	C0	0.261482	0.945	0.862	2.00521e-21	3.88288e-17
HSP90B1	C0	0.689426	1	0.979	2.42004e-21	4.68616e-17
REXO2	C0	0.458148	0.973	0.971	2.42919e-21	4.70388e-17
CCDC59	C0	0.303481	0.941	0.857	2.61039e-21	5.05476e-17
CNIH1	C0	0.290989	0.98	0.956	2.61656e-21	5.06671e-17
UFC1	C0	0.294935	0.984	0.967	2.77273e-21	5.36911e-17
DNAJB6	C0	0.290798	0.98	0.97	3.62503e-21	7.01951e-17
EIF3G	C0	0.261256	0.984	0.989	3.98231e-21	7.71134e-17
TMEM59	C0	0.31859	0.973	0.968	4.52445e-21	8.76114e-17
APEX1	C0	0.291341	0.984	0.981	4.63038e-21	8.96627e-17
PRRC2C	C0	0.360368	0.988	0.979	5.12293e-21	9.92005e-17
TGFB1I1	C0	0.479371	0.937	0.799	1.17422e-20	2.27375e-16
ESD	C0	0.306762	0.973	0.953	1.25904e-20	2.438e-16
NRBP1	C0	0.267188	0.965	0.948	1.39694e-20	2.70504e-16
SELENOM	C0	0.324199	0.871	0.708	1.41128e-20	2.7328e-16
NECTIN2	C0	0.319133	0.984	0.942	1.44041e-20	2.78921e-16
FTH1	C0	0.643967	1	1	1.76467e-20	3.41711e-16
NFE2L2	C0	0.33014	0.984	0.954	1.79691e-20	3.47954e-16
GPX8	C0	0.310249	0.957	0.916	2.39451e-20	4.63673e-16
PXDN	C0	0.397276	0.918	0.882	2.45575e-20	4.75531e-16
CCT3	C0	0.309254	0.996	0.998	2.6508e-20	5.13302e-16
SNX3	C0	0.267589	0.992	0.991	2.66993e-20	5.17005e-16
TCEAL9	C0	0.340555	0.969	0.965	2.73851e-20	5.30286e-16
TMBIM6	C0	0.328161	1	0.992	3.01278e-20	5.83395e-16
RFC1	C0	0.25551	0.949	0.855	3.37267e-20	6.53084e-16
WASF1	C0	0.26488	0.851	0.665	5.07529e-20	9.8278e-16
HYI	C0	0.290707	0.784	0.563	5.24685e-20	1.016e-15
ITGA3	C0	0.398736	0.773	0.609	5.69704e-20	1.10318e-15
SLC39A10	C0	0.258736	0.89	0.739	6.21589e-20	1.20365e-15
M6PR	C0	0.258708	0.973	0.938	6.49329e-20	1.25736e-15
TNFRSF19	C0	0.260511	0.604	0.338	7.91538e-20	1.53273e-15
SNHG8	C0	0.510832	0.961	0.932	8.25756e-20	1.59899e-15
PSMD12	C0	0.290578	0.937	0.885	9.00964e-20	1.74463e-15
OSBPL8	C0	0.329096	0.953	0.9	1.03135e-19	1.9971e-15
HNRNPDL	C0	0.354669	1	0.99	1.40686e-19	2.72425e-15
TMA7	C0	0.305452	1	0.999	1.51407e-19	2.93184e-15
RNF181	C0	0.287964	0.984	0.953	1.52599e-19	2.95493e-15
ZNF428	C0	0.278908	0.992	0.977	1.76972e-19	3.42689e-15
CCNI	C0	0.283672	1	0.999	1.94037e-19	3.75733e-15
PSMA2	C0	0.265414	0.988	0.988	1.95741e-19	3.79033e-15
ARPC5L	C0	0.270697	0.992	0.962	2.11256e-19	4.09077e-15
TCP1	C0	0.353066	0.984	0.976	2.15386e-19	4.17074e-15
KHDRBS1	C0	0.319768	0.992	0.99	2.1719e-19	4.20567e-15
SFRP1	C0	1.4041	0.957	0.945	2.36605e-19	4.58162e-15
DDR2	C0	0.441848	0.867	0.714	2.52025e-19	4.88021e-15
BAMBI	C0	0.748897	0.988	0.964	3.07739e-19	5.95905e-15
MPHOSPH10	C0	0.273228	0.933	0.809	3.20683e-19	6.20971e-15
CCN1	C0	1.21005	0.765	0.592	3.79477e-19	7.34819e-15
SAP18	C0	0.280366	1	0.99	3.95758e-19	7.66345e-15
RPN2	C0	0.381526	0.988	0.982	4.37124e-19	8.46447e-15
MCFD2	C0	0.264626	0.976	0.935	4.40145e-19	8.52298e-15
PSMB7	C0	0.260271	0.98	0.985	4.43671e-19	8.59124e-15
AKR1A1	C0	0.353512	0.969	0.949	5.80479e-19	1.12404e-14
CENPV	C0	0.367469	0.894	0.749	6.03753e-19	1.16911e-14
CTBP2	C0	0.252706	0.961	0.89	6.09303e-19	1.17986e-14
UBE2J1	C0	0.265191	0.949	0.837	6.28512e-19	1.21705e-14
NUDC	C0	0.320648	0.98	0.972	6.57849e-19	1.27386e-14
TCF4	C0	0.410863	0.867	0.69	6.97976e-19	1.35156e-14
LARP6	C0	0.374668	0.949	0.892	7.0325e-19	1.36177e-14
SRA1	C0	0.256341	0.969	0.914	7.56929e-19	1.46572e-14
MIR4435-2HG	C0	0.25143	0.675	0.444	7.80844e-19	1.51203e-14
PAK2	C0	0.271263	0.969	0.925	9.16629e-19	1.77496e-14
PSAT1	C0	0.526826	0.957	0.908	9.64623e-19	1.8679e-14
EIF2S3	C0	0.262788	0.992	0.98	1.02738e-18	1.98941e-14
POLD4	C0	0.280553	0.945	0.878	1.18815e-18	2.30074e-14
SNHG5	C0	0.328561	0.996	0.998	1.23495e-18	2.39135e-14
EIF3D	C0	0.274295	0.988	0.982	1.52988e-18	2.96246e-14
CCPG1	C0	0.420712	0.918	0.844	1.56605e-18	3.0325e-14
COL11A1	C0	0.267589	0.486	0.242	1.81404e-18	3.51271e-14
UFM1	C0	0.28567	0.902	0.82	1.87873e-18	3.63798e-14
EBNA1BP2	C0	0.473207	0.984	0.901	1.94264e-18	3.76173e-14
HBEGF	C0	0.388626	0.518	0.269	1.96174e-18	3.79872e-14
UBXN4	C0	0.265219	0.992	0.973	2.11891e-18	4.10307e-14
MAD2L2	C0	0.250376	0.941	0.8	2.31198e-18	4.47692e-14
C7orf50	C0	0.261066	0.973	0.958	2.59245e-18	5.02001e-14
SNRPG	C0	0.294578	1	0.993	2.62512e-18	5.08328e-14
RPL23	C0	0.259905	1	1	2.79152e-18	5.4055e-14
RPS16	C0	0.273544	1	1	4.07348e-18	7.88789e-14
RNPS1	C0	0.251448	0.992	0.99	4.16426e-18	8.06367e-14
LRRC59	C0	0.301638	0.988	0.944	4.21546e-18	8.16282e-14
SRP19	C0	0.275631	0.976	0.958	4.41738e-18	8.55382e-14
DNAJC3	C0	0.315324	0.894	0.731	4.4508e-18	8.61853e-14
CREG1	C0	0.264551	0.898	0.811	6.13847e-18	1.18865e-13
GDF15	C0	0.452655	0.451	0.208	6.95748e-18	1.34725e-13
CRELD2	C0	0.369775	0.859	0.706	7.57169e-18	1.46618e-13
ITGAV	C0	0.447469	0.933	0.87	9.21847e-18	1.78506e-13
MYH10	C0	0.55267	0.976	0.959	9.61188e-18	1.86125e-13
LDHA	C0	0.358767	0.949	0.887	1.10452e-17	2.1388e-13
MORF4L2	C0	0.300942	0.988	0.991	1.3795e-17	2.67126e-13
EPHB2	C0	0.318161	0.733	0.514	1.71821e-17	3.32714e-13
NANS	C0	0.328819	0.925	0.833	2.28674e-17	4.42805e-13
FAM200B	C0	0.278955	0.957	0.91	2.58019e-17	4.99628e-13
OS9	C0	0.264299	0.961	0.912	3.05495e-17	5.91561e-13
SKIL	C0	0.382224	0.965	0.912	3.66876e-17	7.10419e-13
GADD45B	C0	0.306692	0.624	0.384	4.25167e-17	8.23293e-13
SSBP1	C0	0.271974	0.976	0.983	6.08641e-17	1.17857e-12
PSMB6	C0	0.275223	0.984	0.987	6.68816e-17	1.29509e-12
CAPZB	C0	0.252578	0.996	0.989	9.43894e-17	1.82776e-12
ACTN4	C0	0.456659	0.965	0.903	9.69794e-17	1.87791e-12
FZD1	C0	0.349965	0.639	0.398	1.06269e-16	2.05779e-12
ZEB2	C0	0.309736	0.792	0.616	1.55292e-16	3.00707e-12
CTSL	C0	0.275099	0.914	0.832	1.61429e-16	3.1259e-12
GJA1	C0	0.285204	0.698	0.385	1.84494e-16	3.57254e-12
H3F3A	C0	0.403336	1	1	1.86609e-16	3.6135e-12
LSM4	C0	0.267379	1	0.983	2.05542e-16	3.98012e-12
HNRNPH3	C0	0.294928	0.988	0.977	2.28899e-16	4.43239e-12
CPE	C0	0.303144	0.886	0.748	2.76627e-16	5.35661e-12
CCDC85B	C0	0.381764	0.949	0.895	2.85308e-16	5.52469e-12
CISD2	C0	0.271401	0.98	0.926	2.86572e-16	5.54919e-12
SQSTM1	C0	0.528709	0.996	0.985	3.2043e-16	6.20481e-12
LMCD1	C0	0.383326	0.58	0.352	3.85034e-16	7.4558e-12
COMT	C0	0.306117	0.643	0.467	4.85667e-16	9.40446e-12
MCL1	C0	0.314719	0.961	0.891	4.9044e-16	9.49687e-12
PHLDB2	C0	0.312872	0.808	0.58	5.14658e-16	9.96584e-12
RAI14	C0	0.449232	0.957	0.823	5.46537e-16	1.05831e-11
TLN1	C0	0.324446	0.98	0.973	5.65827e-16	1.09567e-11
LAMB1	C0	0.352423	0.898	0.751	7.54729e-16	1.46146e-11
SESN3	C0	0.371404	0.745	0.545	8.02203e-16	1.55339e-11
ID1	C0	0.490311	0.561	0.298	9.84632e-16	1.90664e-11
PRNP	C0	0.282125	0.898	0.803	1.63739e-15	3.17065e-11
DDX46	C0	0.258802	0.953	0.923	1.8136e-15	3.51186e-11
ADI1	C0	0.266555	0.933	0.838	2.09474e-15	4.05626e-11
ARF1	C0	0.255646	1	0.998	2.7337e-15	5.29354e-11
PDLIM3	C0	0.582538	0.831	0.652	3.3722e-15	6.52993e-11
UBC	C0	0.457991	1	0.998	4.75864e-15	9.21463e-11
DHCR7	C0	0.411785	0.969	0.952	5.17593e-15	1.00227e-10
PCOLCE	C0	0.260194	0.576	0.322	5.86221e-15	1.13516e-10
EPB41L4A-AS1	C0	0.300425	0.976	0.94	5.89099e-15	1.14073e-10
GAS5	C0	0.418813	1	0.998	6.16729e-15	1.19423e-10
S100A13	C0	0.403738	0.953	0.896	9.47303e-15	1.83436e-10
YTHDF2	C0	0.288547	0.973	0.964	9.54466e-15	1.84823e-10
UACA	C0	0.513416	0.89	0.787	1.00727e-14	1.95048e-10
TUBB2B	C0	0.425865	0.973	0.924	1.00897e-14	1.95378e-10
SNHG15	C0	0.293375	0.796	0.602	1.22987e-14	2.38152e-10
CIRBP	C0	0.300708	1	0.999	1.6358e-14	3.16756e-10
LGALS3BP	C0	0.269626	0.678	0.483	1.82313e-14	3.5303e-10
TCEAL8	C0	0.25918	0.957	0.955	1.87252e-14	3.62595e-10
SNHG1	C0	0.322409	0.914	0.778	2.14321e-14	4.15011e-10
PITX2	C0	0.259061	0.459	0.235	2.14514e-14	4.15385e-10
SRSF3	C0	0.347	0.996	0.981	2.15553e-14	4.17397e-10
NET1	C0	0.258989	0.58	0.353	2.31153e-14	4.47605e-10
HSPA8	C0	0.445228	0.992	0.999	2.66488e-14	5.16028e-10
TNFRSF12A	C0	0.66029	0.855	0.818	4.51198e-14	8.73701e-10
SFPQ	C0	0.320813	0.996	0.977	5.04035e-14	9.76014e-10
RPS26	C0	0.258862	1	0.998	6.00617e-14	1.16304e-09
CACYBP	C0	0.436839	0.984	0.948	6.63743e-14	1.28527e-09
EEF2	C0	0.280451	1	1	7.79425e-14	1.50928e-09
APP	C0	0.3221	0.988	0.978	1.25368e-13	2.42763e-09
FSTL1	C0	0.407905	0.965	0.933	1.55576e-13	3.01257e-09
HDAC2	C0	0.253	0.988	0.976	1.80249e-13	3.49033e-09
RAB33A	C0	0.327702	0.831	0.649	1.82736e-13	3.5385e-09
TTC3	C0	0.301435	0.996	0.992	2.66381e-13	5.1582e-09
CSRP1	C0	0.508156	0.545	0.348	3.9851e-13	7.71675e-09
ZNF703	C0	0.408054	0.863	0.74	5.12829e-13	9.93042e-09
ZFAND2A	C0	0.630536	0.875	0.749	6.22371e-13	1.20516e-08
TXNRD1	C0	0.539126	0.969	0.891	1.0151e-12	1.96563e-08
DDX21	C0	0.294471	0.988	0.961	1.02467e-12	1.98417e-08
DDX5	C0	0.273301	0.996	0.995	1.06824e-12	2.06854e-08
SEPTIN6	C0	0.299252	0.914	0.849	1.39766e-12	2.70642e-08
CCT5	C0	0.26738	1	0.991	2.31459e-12	4.48198e-08
SELENOK	C0	0.310337	0.996	0.976	2.36425e-12	4.57812e-08
PPP1R14A	C0	0.356123	0.612	0.424	3.31212e-12	6.41359e-08
KRT19	C0	0.681667	0.898	0.84	3.31363e-12	6.41652e-08
TCAF1	C0	0.259411	0.902	0.831	3.59152e-12	6.95462e-08
HEBP2	C0	0.274596	0.976	0.965	4.58438e-12	8.87719e-08
CDK2AP2	C0	0.295118	0.941	0.856	4.76858e-12	9.23388e-08
LSM3	C0	0.257771	0.98	0.953	5.18116e-12	1.00328e-07
SSB	C0	0.25299	0.996	0.992	6.50145e-12	1.25894e-07
ATP6V0B	C0	0.255733	0.996	0.992	6.75259e-12	1.30757e-07
FADS2	C0	0.34305	0.965	0.935	1.11709e-11	2.16313e-07
SPINT2	C0	0.408318	0.976	0.965	7.47674e-11	1.4478e-06
CD59	C0	0.366913	0.961	0.922	1.1013e-10	2.13257e-06
POU5F1	C0	0.39823	0.557	0.365	1.19443e-10	2.3129e-06
YWHAZ	C0	0.265854	0.996	0.999	1.78837e-10	3.463e-06
CADM1	C0	0.370101	0.89	0.801	2.03983e-10	3.94993e-06
CCND2	C0	0.285129	0.973	0.872	2.48009e-10	4.80245e-06
ACTA2	C0	1.53107	0.604	0.422	2.63566e-10	5.10369e-06
CSRP2	C0	0.514057	0.973	0.953	2.6617e-10	5.15411e-06
MAP1B	C0	0.339072	0.996	1	2.83602e-10	5.49167e-06
CXXC5	C0	0.286804	0.945	0.934	3.40493e-10	6.59331e-06
NME4	C0	0.273826	0.98	0.988	3.41828e-10	6.61916e-06
JAG1	C0	0.290739	0.918	0.837	3.4742e-10	6.72744e-06
NOP56	C0	0.255049	0.976	0.963	6.69915e-10	1.29722e-05
TCEA1	C0	0.270444	0.988	0.985	6.72864e-10	1.30293e-05
IER3	C0	0.261432	0.718	0.537	1.63575e-09	3.16747e-05
NUCB2	C0	0.378794	0.929	0.892	2.06433e-09	3.99736e-05
RPL22L1	C0	0.462095	0.945	0.89	2.08711e-09	4.04148e-05
IGFBP4	C0	0.307576	0.6	0.381	2.21746e-09	4.29389e-05
TRIB3	C0	0.419835	0.89	0.782	2.33981e-09	4.5308e-05
TUBA1B	C0	0.387363	0.992	0.994	2.62446e-09	5.08201e-05
NEAT1	C0	0.546578	0.875	0.786	3.67104e-09	7.10861e-05
ISG15	C0	0.257432	0.886	0.797	4.69961e-09	9.10033e-05
TUBB2A	C0	0.292318	0.914	0.856	6.77376e-09	0.000131167
SLC7A5	C0	0.359605	0.929	0.897	9.63892e-09	0.000186648
PTN	C0	0.301692	0.749	0.572	1.57657e-08	0.000305286
GCLM	C0	0.280509	0.682	0.525	2.00745e-08	0.000388722
UCHL1	C0	0.363594	0.984	0.978	2.37399e-08	0.0004597
C4orf48	C0	0.268982	1	0.998	2.56475e-08	0.000496638
HES4	C0	0.298733	0.945	0.866	3.77962e-08	0.000731886
OPTN	C0	0.250404	0.847	0.819	6.56244e-08	0.00127075
ACAT2	C0	0.475266	0.965	0.948	6.66904e-08	0.00129139
CTSB	C0	0.37929	0.976	0.941	7.45139e-08	0.00144289
MTHFD2	C0	0.262754	0.973	0.944	1.03934e-07	0.00201258
MDK	C0	0.37145	1	1	1.05349e-07	0.00203997
XBP1	C0	0.290773	0.988	0.968	1.44954e-07	0.00280689
CYP51A1	C0	0.289882	0.988	0.982	2.85559e-07	0.00552956
LRRC75A	C0	0.286783	0.831	0.703	9.50405e-07	0.0184036
SDF2L1	C0	0.321424	0.886	0.807	1.83716e-06	0.0355748
NRP2	C0	0.272043	0.824	0.734	2.45967e-06	0.0476291
PPP1R15A	C0	0.346381	0.937	0.848	6.08245e-06	0.11778
DLC1	C0	0.263529	0.78	0.708	1.00424e-05	0.194461
RBP1	C0	0.435353	0.945	0.966	1.50339e-05	0.291116
CYBA	C0	0.292628	0.714	0.609	2.36093e-05	0.45717
DDIT4	C0	0.253	0.878	0.8	5.98189e-05	1
FDPS	C0	0.270771	0.98	0.992	8.44534e-05	1
COL4A1	C0	0.472572	0.91	0.917	8.86868e-05	1
S100A16	C0	0.391274	0.722	0.64	0.000253958	1
TM7SF2	C0	0.250815	0.953	0.96	0.00104348	1
MEIS2	C0	0.252621	0.933	0.978	0.00122472	1
CXCL12	C0	0.310744	0.71	0.668	0.0015683	1
GADD45A	C0	0.434736	0.953	0.937	0.00162801	1
HMOX1	C0	0.82047	0.333	0.242	0.00953071	1
H19	C0	0.320952	0.408	0.532	0.00975168	1
NPPB	C3	3.28446	0.995	0.695	4.20844e-74	8.14923e-70
ANKRD1	C3	1.72329	1	0.851	1.13338e-63	2.19468e-59
NPPA	C3	1.94773	1	0.898	5.54336e-53	1.07342e-48
MYOZ2	C3	0.836334	1	0.895	2.58248e-46	5.00072e-42
SYNPO2L	C3	1.15645	0.985	0.798	7.15564e-46	1.38562e-41
ADAM19	C3	0.475352	0.913	0.524	1.09727e-42	2.12475e-38
PCGF5	C3	0.55909	0.969	0.817	1.17892e-42	2.28286e-38
ACTC1	C3	1.19224	1	0.981	1.18379e-36	2.2923e-32
GYG1	C3	0.694627	1	0.974	3.59128e-36	6.95416e-32
CRYAB	C3	0.898268	0.995	0.8	6.22721e-36	1.20584e-31
FLNC	C3	0.918288	0.995	0.978	2.68245e-35	5.19431e-31
TAGLN	C3	0.993013	1	0.925	5.75573e-35	1.11454e-30
CAVIN1	C3	0.495444	0.995	0.872	4.79085e-34	9.277e-30
CCN2	C3	0.344046	0.959	0.544	2.35169e-33	4.55382e-29
TUBB6	C3	0.609206	1	0.959	7.59065e-33	1.46985e-28
UGP2	C3	0.63447	1	0.995	8.89928e-33	1.72326e-28
MAP4	C3	0.457578	1	0.986	3.93089e-32	7.61178e-28
CSRP3	C3	1.39704	0.99	0.813	4.57654e-32	8.86202e-28
XRCC4	C3	0.658979	0.877	0.578	5.12574e-32	9.92548e-28
MASP1	C3	0.787675	0.918	0.62	1.93863e-31	3.75396e-27
TPM1	C3	0.617602	1	1	2.96908e-31	5.74933e-27
ADAMTSL4	C3	0.430353	0.8	0.476	3.10269e-31	6.00805e-27
SAMD4A	C3	0.374758	0.969	0.755	5.32384e-31	1.03091e-26
TRIM55	C3	0.650246	0.995	0.793	1.09051e-30	2.11167e-26
RBPMS	C3	0.428042	1	0.992	4.70111e-30	9.10323e-26
ZFHX2	C3	0.266941	0.749	0.388	5.575e-30	1.07954e-25
SH3D19	C3	0.287365	0.938	0.706	9.70702e-30	1.87967e-25
C1orf198	C3	0.437704	0.969	0.842	1.18038e-29	2.28568e-25
SPTAN1	C3	0.445126	0.995	0.96	3.29109e-29	6.37286e-25
ACTA1	C3	1.95413	0.892	0.622	4.46048e-29	8.63727e-25
HSPB1	C3	0.564712	1	0.998	4.72275e-29	9.14514e-25
IVNS1ABP	C3	0.575494	0.985	0.93	8.93284e-29	1.72976e-24
DUSP14	C3	0.41303	0.959	0.848	3.06477e-28	5.93463e-24
GADD45G	C3	0.454225	0.713	0.366	6.54131e-28	1.26666e-23
PDLIM3	C3	0.913634	0.903	0.649	9.09676e-28	1.7615e-23
COL2A1	C3	0.846798	0.995	0.893	1.33537e-27	2.58582e-23
MYH11	C3	0.67896	0.651	0.286	2.00266e-27	3.87795e-23
IER3	C3	0.539703	0.856	0.522	2.08166e-27	4.03092e-23
PEA15	C3	0.49169	0.99	0.946	2.7972e-27	5.4165e-23
CNN1	C3	0.618794	0.995	0.931	5.07432e-27	9.82591e-23
TNNC1	C3	0.798053	1	0.919	8.33823e-27	1.61461e-22
CDC42EP3	C3	0.515525	0.985	0.897	1.28393e-26	2.48621e-22
SORBS2	C3	0.736633	0.995	0.833	1.3617e-26	2.6368e-22
HMCES	C3	0.397746	0.959	0.831	2.87011e-26	5.55767e-22
MLLT11	C3	0.514921	1	0.975	3.23866e-26	6.27133e-22
CMC2	C3	0.331618	0.99	0.974	3.68565e-26	7.13688e-22
SLC20A2	C3	0.392991	0.969	0.862	3.80034e-26	7.35898e-22
HACD1	C3	0.445751	1	0.982	4.04146e-26	7.82589e-22
USP28	C3	0.389659	0.99	0.914	5.60555e-26	1.08546e-21
SH3GL3	C3	0.370532	0.877	0.63	5.99738e-26	1.16133e-21
HEG1	C3	0.498275	0.918	0.724	6.09328e-26	1.1799e-21
S1PR1	C3	0.368442	0.959	0.686	9.88597e-26	1.91432e-21
TNFRSF12A	C3	0.565214	0.979	0.798	1.1471e-25	2.22124e-21
CALB2	C3	0.494705	0.656	0.3	2.29957e-25	4.4529e-21
PALM2-AKAP2	C3	0.513649	1	0.963	3.8732e-25	7.50006e-21
EMP2	C3	0.657878	0.995	0.927	4.14028e-25	8.01724e-21
CAMK2D	C3	0.412438	0.995	0.976	4.83537e-25	9.3632e-21
RAI14	C3	0.441314	0.979	0.827	5.40983e-25	1.04756e-20
UNC45B	C3	0.477147	1	0.814	6.59435e-25	1.27693e-20
FAM78A	C3	0.446151	0.974	0.7	7.20713e-25	1.39559e-20
CHCHD6	C3	0.440285	0.979	0.923	8.91521e-25	1.72634e-20
B3GNT2	C3	0.261322	0.764	0.447	9.43192e-25	1.8264e-20
TUBB2B	C3	0.66248	0.99	0.924	1.00262e-24	1.94147e-20
TGM2	C3	0.671783	0.933	0.706	1.75694e-24	3.40214e-20
PARVA	C3	0.289445	0.99	0.918	2.6177e-24	5.06891e-20
GHRH	C3	0.407114	0.559	0.22	3.55637e-24	6.88655e-20
RASAL2	C3	0.319029	0.964	0.774	3.70485e-24	7.17408e-20
PAM	C3	0.611921	1	0.955	5.23059e-24	1.01285e-19
THBS1	C3	0.334727	0.779	0.448	9.95674e-24	1.92802e-19
NES	C3	0.576292	1	0.988	1.14534e-23	2.21784e-19
CFL2	C3	0.355709	1	0.98	1.32019e-23	2.55641e-19
OAZ1	C3	0.266168	1	0.999	1.73704e-23	3.36361e-19
EIF5B	C3	0.395935	1	0.989	2.092e-23	4.05094e-19
NT5C2	C3	0.294566	0.954	0.773	5.66431e-23	1.09684e-18
MYO18B	C3	0.367243	0.969	0.737	6.69819e-23	1.29704e-18
MYL7	C3	0.745626	1	0.999	7.13073e-23	1.38079e-18
OXCT1	C3	0.303307	0.995	0.904	1.44166e-22	2.79163e-18
TEAD1	C3	0.335579	0.995	0.936	1.60704e-22	3.11187e-18
ACTN1	C3	0.434827	1	0.95	1.87563e-22	3.63198e-18
EIF1B	C3	0.437177	1	0.992	1.95948e-22	3.79433e-18
LRRC49	C3	0.465225	0.892	0.665	2.0252e-22	3.9216e-18
MRAS	C3	0.319998	0.954	0.803	2.40058e-22	4.64848e-18
ACTN2	C3	0.65639	0.995	0.833	3.11104e-22	6.02422e-18
SIPA1L2	C3	0.437827	0.99	0.961	4.36919e-22	8.4605e-18
ATP13A3	C3	0.470434	0.974	0.895	8.69033e-22	1.68279e-17
PICALM	C3	0.34752	0.979	0.924	8.92215e-22	1.72769e-17
KIFAP3	C3	0.394502	0.974	0.899	9.68812e-22	1.87601e-17
RND3	C3	0.258562	0.846	0.51	9.70459e-22	1.8792e-17
FILIP1	C3	0.499108	1	0.912	2.47874e-21	4.79984e-17
AIF1L	C3	0.344192	0.867	0.627	3.46489e-21	6.70941e-17
JPH2	C3	0.330797	0.964	0.791	3.5048e-21	6.78669e-17
SLC25A23	C3	0.41903	0.99	0.939	5.07469e-21	9.82663e-17
MYOCD	C3	0.454778	0.99	0.794	5.57602e-21	1.07974e-16
SORT1	C3	0.360536	0.959	0.831	6.55159e-21	1.26865e-16
MYL9	C3	0.494345	1	0.994	7.44754e-21	1.44214e-16
POPDC2	C3	0.498258	1	0.83	8.97629e-21	1.73817e-16
SVIL	C3	0.416761	1	0.943	1.11852e-20	2.16589e-16
CPEB4	C3	0.368465	0.99	0.862	1.12258e-20	2.17376e-16
RHOBTB3	C3	0.412642	1	0.996	2.42224e-20	4.69043e-16
DIPK2A	C3	0.306699	0.887	0.671	3.32628e-20	6.44101e-16
AMOTL2	C3	0.254503	0.918	0.673	3.76947e-20	7.29921e-16
TIMP3	C3	0.65103	0.979	0.901	5.0433e-20	9.76585e-16
NEXN	C3	0.46788	1	0.959	5.21681e-20	1.01018e-15
MID1	C3	0.271901	0.851	0.557	5.80941e-20	1.12493e-15
SLMAP	C3	0.354297	0.949	0.857	7.90423e-20	1.53058e-15
HABP4	C3	0.277084	0.969	0.861	8.10901e-20	1.57023e-15
HEPH	C3	0.38652	0.944	0.8	9.27683e-20	1.79636e-15
MYOM1	C3	0.544958	0.995	0.807	1.14089e-19	2.20921e-15
AKAP6	C3	0.262011	0.851	0.541	1.22925e-19	2.38032e-15
XIRP1	C3	0.411799	0.979	0.745	1.53398e-19	2.97039e-15
ULK4	C3	0.259268	0.836	0.577	1.58538e-19	3.06992e-15
CCN1	C3	0.257966	0.856	0.585	1.77489e-19	3.4369e-15
SMPX	C3	0.514606	0.99	0.843	3.11592e-19	6.03367e-15
DKK3	C3	0.368511	0.99	0.92	3.54893e-19	6.87215e-15
EMC10	C3	0.410075	0.995	0.977	6.15036e-19	1.19096e-14
MAP1LC3B	C3	0.407839	1	0.996	6.56967e-19	1.27215e-14
NUAK1	C3	0.352298	0.872	0.682	7.36634e-19	1.42642e-14
MGST1	C3	0.408549	0.974	0.865	8.35603e-19	1.61806e-14
AEBP1	C3	0.346958	0.995	0.946	1.46043e-18	2.82798e-14
SYNM	C3	0.255557	0.8	0.526	1.86001e-18	3.60172e-14
MYH7	C3	0.903695	0.805	0.492	2.2728e-18	4.40104e-14
ARHGAP23	C3	0.260981	0.903	0.725	3.76383e-18	7.28827e-14
HOPX	C3	0.259521	0.518	0.222	5.59548e-18	1.08351e-13
ABLIM1	C3	0.393159	1	0.939	5.87899e-18	1.13841e-13
CYTOR	C3	0.28389	0.851	0.581	7.29201e-18	1.41203e-13
GPC1	C3	0.327442	0.949	0.858	1.21366e-17	2.35012e-13
MYL12A	C3	0.429344	1	0.994	1.50788e-17	2.91985e-13
PPFIBP1	C3	0.270623	0.938	0.802	1.59266e-17	3.08402e-13
DGKI	C3	0.380805	0.974	0.819	2.17834e-17	4.21814e-13
S100A10	C3	0.434166	0.944	0.657	2.94666e-17	5.7059e-13
WEE1	C3	0.383975	0.938	0.763	2.96495e-17	5.74134e-13
PKP2	C3	0.391924	0.99	0.924	4.1823e-17	8.09861e-13
TUBB2A	C3	0.350136	0.979	0.847	4.69768e-17	9.09659e-13
SLC38A1	C3	0.351745	0.995	0.988	4.94441e-17	9.57435e-13
LIMS2	C3	0.337576	0.995	0.91	8.06693e-17	1.56208e-12
MAP1B	C3	0.45595	1	0.999	1.76397e-16	3.41575e-12
CDV3	C3	0.275308	1	0.994	2.96672e-16	5.74475e-12
RRAS	C3	0.266867	0.959	0.805	3.65494e-16	7.07743e-12
MAP2K1	C3	0.269699	0.903	0.77	4.86139e-16	9.41359e-12
PRSS35	C3	0.313567	0.826	0.535	6.18071e-16	1.19683e-11
DUSP3	C3	0.273239	0.985	0.928	6.32697e-16	1.22515e-11
RAB4A	C3	0.305844	0.969	0.939	1.06293e-15	2.05826e-11
CAP2	C3	0.304953	1	0.963	1.35053e-15	2.61517e-11
MYL6	C3	0.400652	1	1	1.3542e-15	2.62226e-11
HSPG2	C3	0.302301	0.938	0.746	2.15853e-15	4.17978e-11
MACF1	C3	0.367164	0.99	0.969	2.52289e-15	4.88533e-11
CMYA5	C3	0.375058	0.938	0.73	2.92849e-15	5.67074e-11
ARHGAP1	C3	0.255761	0.995	0.918	5.25713e-15	1.01799e-10
COL5A2	C3	0.5439	0.897	0.771	5.40772e-15	1.04715e-10
RAB31	C3	0.261175	0.923	0.766	6.60508e-15	1.27901e-10
RBM20	C3	0.324216	0.995	0.895	9.72732e-15	1.8836e-10
UNC5B-AS1	C3	0.450156	0.759	0.503	1.08119e-14	2.09363e-10
RELN	C3	0.331802	0.738	0.484	1.09403e-14	2.11848e-10
GLRX	C3	0.470447	0.862	0.714	1.10377e-14	2.13734e-10
SH3GLB1	C3	0.280114	1	0.975	1.18072e-14	2.28634e-10
LMO7	C3	0.279366	0.944	0.766	1.60372e-14	3.10545e-10
DENND5B	C3	0.283282	0.99	0.94	1.76501e-14	3.41776e-10
TTN	C3	0.599634	1	0.915	1.89033e-14	3.66043e-10
CCDC50	C3	0.279714	0.974	0.95	1.95388e-14	3.78349e-10
PAWR	C3	0.256549	1	0.961	2.041e-14	3.95218e-10
PGRMC2	C3	0.322259	0.959	0.91	2.29953e-14	4.45281e-10
SLC7A5	C3	0.309996	0.979	0.89	3.14393e-14	6.0879e-10
ITGB1BP2	C3	0.292433	0.928	0.707	3.52334e-14	6.8226e-10
PDLIM5	C3	0.312788	1	0.981	4.46767e-14	8.65119e-10
ANXA3	C3	0.307367	0.979	0.926	6.05495e-14	1.17248e-09
HSPB3	C3	0.371874	0.872	0.633	7.21187e-14	1.39651e-09
SPTBN1	C3	0.282468	0.995	0.979	1.15815e-13	2.24264e-09
MYLK3	C3	0.355546	0.985	0.776	1.37358e-13	2.65979e-09
DMD	C3	0.254035	0.944	0.822	1.59314e-13	3.08495e-09
MYL4	C3	0.4973	1	0.927	1.63135e-13	3.15894e-09
MDN1	C3	0.340218	0.923	0.831	2.27769e-13	4.41051e-09
SH3BGR	C3	0.444247	0.774	0.571	2.85558e-13	5.52954e-09
TNNT2	C3	0.489263	1	0.979	3.29485e-13	6.38014e-09
PFKP	C3	0.32435	1	0.976	8.75282e-13	1.6949e-08
CCND2	C3	0.287544	0.964	0.879	8.77352e-13	1.6989e-08
MYADM	C3	0.266683	0.995	0.947	9.85721e-13	1.90875e-08
ATP2A2	C3	0.434466	1	0.992	1.57933e-12	3.05821e-08
PRKAG2	C3	0.262367	0.979	0.925	2.58476e-12	5.00513e-08
PHLDB2	C3	0.255459	0.8	0.594	5.24261e-12	1.01518e-07
DNAJC15	C3	0.353264	0.933	0.835	7.43402e-12	1.43952e-07
AKAP13	C3	0.285433	0.974	0.942	8.97101e-12	1.73715e-07
BZW2	C3	0.2711	0.995	0.967	9.76115e-12	1.89015e-07
PPP1R14C	C3	0.292942	0.969	0.793	1.07657e-11	2.08467e-07
IRS2	C3	0.359118	0.841	0.684	1.59229e-11	3.08331e-07
LPP	C3	0.264616	0.995	0.955	2.02088e-11	3.91323e-07
ATP1A1	C3	0.257693	1	0.994	2.77875e-11	5.38078e-07
FERMT2	C3	0.251403	0.995	0.973	2.79621e-11	5.41459e-07
LDLR	C3	0.351078	0.944	0.876	2.92512e-11	5.6642e-07
TP53I3	C3	0.388229	0.933	0.883	3.27135e-11	6.33463e-07
PALLD	C3	0.25833	1	0.974	6.86733e-11	1.32979e-06
SLC8A1	C3	0.312084	0.995	0.856	8.16136e-11	1.58037e-06
TERF1	C3	0.290398	0.913	0.848	8.58966e-11	1.6633e-06
ACTN4	C3	0.272525	0.974	0.905	1.04132e-10	2.01642e-06
MMP15	C3	0.299847	0.995	0.907	1.80708e-10	3.49922e-06
GADD45A	C3	0.268411	0.974	0.934	2.79284e-10	5.40806e-06
PDLIM1	C3	0.299357	0.979	0.937	3.85862e-10	7.47183e-06
IDI1	C3	0.375478	0.99	0.973	5.12829e-10	9.93043e-06
TNNI3	C3	0.638555	0.744	0.593	4.67605e-09	9.0547e-05
FAM189B	C3	0.257875	0.923	0.878	8.55159e-09	0.000165593
MVD	C3	0.306953	0.964	0.941	1.05442e-08	0.000204179
TUBA1A	C3	0.29507	0.995	0.982	1.05676e-08	0.00020463
PITPNM1	C3	0.26645	0.805	0.701	1.40368e-08	0.000271808
ACAT2	C3	0.285328	0.974	0.947	4.76323e-08	0.000922352
DPYSL3	C3	0.287782	0.995	0.953	6.21969e-08	0.00120438
HMGCS1	C3	0.438499	0.99	0.984	7.36018e-08	0.00142522
ACLY	C3	0.250934	0.99	0.974	8.09944e-08	0.00156837
TMEM97	C3	0.299247	0.969	0.944	1.09067e-07	0.00211196
NEBL	C3	0.279044	1	0.861	2.1078e-07	0.00408155
AC020909.2	C3	0.301097	1	0.95	4.35671e-07	0.00843633
CSRP2	C3	0.26684	0.974	0.954	5.40446e-07	0.0104652
GSTO1	C3	0.334407	0.985	0.952	1.40105e-06	0.02713
SCD	C3	0.252406	0.995	0.984	2.60055e-06	0.0503571
MALAT1	C3	0.253586	1	0.987	7.16663e-06	0.138775
NEAT1	C3	0.358073	0.872	0.792	1.02425e-05	0.198336
CKB	C3	0.264222	0.995	0.97	3.43495e-05	0.665143
PRDX1	C3	0.33323	0.99	0.997	0.000122344	1
GSTP1	C3	0.286471	1	0.998	0.000217292	1
CDK2AP2	C3	0.284459	0.933	0.863	0.000222603	1
LINC01405	C3	0.307675	0.508	0.384	0.000558264	1
AKR1B1	C3	0.359088	0.974	0.951	0.00175923	1
MKI67	C1	1.32275	0.87	0.044	6.27096e-159	1.21431e-154
PBK	C1	0.866403	0.894	0.056	2.89958e-152	5.61474e-148
KIF4A	C1	0.66621	0.797	0.042	2.55528e-141	4.94804e-137
GTSE1	C1	0.79213	0.829	0.049	4.22479e-141	8.18088e-137
TOP2A	C1	2.02589	0.927	0.082	4.06582e-140	7.87306e-136
CEP55	C1	0.541791	0.797	0.043	6.65242e-139	1.28817e-134
DLGAP5	C1	1.00559	0.821	0.052	3.84855e-138	7.45233e-134
DEPDC1	C1	1.33898	0.919	0.086	2.05891e-137	3.98688e-133
NCAPH	C1	0.392764	0.797	0.044	2.83137e-136	5.48266e-132
NDC80	C1	0.65699	0.797	0.051	4.23723e-131	8.20496e-127
NCAPG	C1	0.510097	0.813	0.056	1.5637e-130	3.02795e-126
SPC24	C1	0.438479	0.862	0.071	1.05475e-129	2.04242e-125
SHCBP1	C1	0.631638	0.878	0.082	1.41393e-128	2.73793e-124
CCNA2	C1	0.976534	0.878	0.082	2.43722e-128	4.71944e-124
NUSAP1	C1	1.07016	0.935	0.103	5.02576e-128	9.73188e-124
ASPM	C1	1.12086	0.919	0.108	1.72512e-123	3.34053e-119
KIF18B	C1	0.267909	0.602	0.018	2.03363e-122	3.93792e-118
CKAP2L	C1	0.456325	0.724	0.04	2.26211e-122	4.38035e-118
TK1	C1	0.6359	0.854	0.076	4.62976e-122	8.96507e-118
MYBL2	C1	0.869232	0.943	0.101	3.08456e-121	5.97295e-117
CIT	C1	0.371497	0.707	0.041	1.95049e-120	3.77692e-116
KIF2C	C1	0.511654	0.764	0.056	9.98554e-119	1.9336e-114
SPC25	C1	0.317873	0.667	0.03	2.2384e-118	4.33444e-114
CDCA8	C1	0.527887	0.732	0.047	3.0508e-118	5.90757e-114
CDC20	C1	1.14365	0.902	0.107	3.2317e-117	6.25786e-113
KIF14	C1	0.652666	0.764	0.058	5.41941e-117	1.04941e-112
CDCA5	C1	0.453055	0.789	0.063	6.39534e-117	1.23839e-112
BUB1B	C1	0.609271	0.862	0.093	9.50852e-117	1.84123e-112
FOXM1	C1	0.876571	0.902	0.112	4.24035e-116	8.21102e-112
SPAG5	C1	0.554246	0.854	0.093	6.92708e-116	1.34136e-111
RRM2	C1	0.894166	0.821	0.074	1.53613e-115	2.97456e-111
NUF2	C1	0.439714	0.748	0.054	1.32394e-113	2.56368e-109
CDK1	C1	1.04052	0.846	0.088	3.55148e-113	6.87709e-109
KNL1	C1	0.5885	0.846	0.089	5.42651e-113	1.05079e-108
KIF20A	C1	0.655169	0.707	0.046	2.28143e-112	4.41775e-108
UBE2C	C1	1.60002	0.846	0.093	2.56619e-112	4.96917e-108
BIRC5	C1	1.65996	0.935	0.135	1.31108e-111	2.53878e-107
PRC1	C1	1.25378	0.943	0.156	9.57497e-109	1.8541e-104
ASF1B	C1	0.300413	0.707	0.048	1.15216e-108	2.23104e-104
AURKB	C1	0.525709	0.724	0.054	1.18035e-107	2.28563e-103
CDC25C	C1	0.299732	0.618	0.03	1.51055e-107	2.92503e-103
TYMS	C1	1.69742	1	0.214	3.15546e-105	6.11023e-101
PCLAF	C1	0.98392	0.919	0.133	3.31465e-105	6.41848e-101
BUB1	C1	0.75479	0.911	0.145	4.26571e-105	8.26012e-101
ARHGAP11A	C1	0.631264	0.805	0.088	5.61717e-105	1.08771e-100
SKA1	C1	0.325823	0.707	0.054	5.86997e-105	1.13666e-100
ANLN	C1	1.3623	0.976	0.206	2.97684e-104	5.76436e-100
NEK2	C1	0.470559	0.667	0.046	1.11557e-103	2.16019e-99
RAD51AP1	C1	0.408326	0.789	0.079	4.87832e-102	9.44638e-98
TTK	C1	0.401433	0.683	0.053	1.26308e-101	2.44584e-97
HMMR	C1	0.883114	0.935	0.165	5.08908e-101	9.85449e-97
SGO1	C1	0.417223	0.764	0.076	2.63864e-100	5.10946e-96
PRR11	C1	0.984369	0.846	0.118	3.62543e-100	7.02029e-96
HJURP	C1	0.412582	0.634	0.041	4.61439e-100	8.93531e-96
CENPU	C1	0.447352	0.854	0.108	1.0872e-99	2.10526e-95
TPX2	C1	1.39892	0.976	0.213	2.2832e-99	4.42119e-95
PIMREG	C1	0.450605	0.675	0.053	3.9572e-98	7.66272e-94
CDCA3	C1	0.692557	0.724	0.072	1.22569e-97	2.37343e-93
KIF11	C1	0.505817	0.805	0.1	1.82916e-97	3.54199e-93
FANCI	C1	0.624754	0.943	0.182	2.67534e-95	5.18053e-91
XRCC2	C1	0.333551	0.715	0.07	6.54343e-95	1.26707e-90
KIF23	C1	0.868455	0.927	0.186	6.97387e-94	1.35042e-89
FAM83D	C1	0.419349	0.61	0.042	2.31212e-93	4.4772e-89
CDCA2	C1	0.401735	0.659	0.057	3.98756e-92	7.7215e-88
CCNB2	C1	0.794527	0.829	0.122	4.68153e-92	9.06532e-88
FANCD2	C1	0.351274	0.78	0.096	2.32781e-91	4.50757e-87
CENPE	C1	0.935448	0.764	0.098	2.48683e-91	4.81549e-87
MAD2L1	C1	0.746558	0.967	0.221	6.92591e-90	1.34113e-85
MCM10	C1	0.362064	0.618	0.046	3.34054e-89	6.46861e-85
CENPF	C1	2.29614	0.951	0.25	1.89772e-88	3.67474e-84
PLK1	C1	1.08766	0.789	0.118	5.28125e-87	1.02266e-82
TACC3	C1	0.803289	0.935	0.221	6.08197e-87	1.17771e-82
ZWINT	C1	0.703285	0.935	0.215	1.01785e-86	1.97096e-82
RACGAP1	C1	0.60877	0.789	0.121	6.24172e-86	1.20865e-81
TROAP	C1	0.424936	0.691	0.077	2.39956e-83	4.64652e-79
CENPK	C1	0.517519	0.813	0.138	7.17454e-83	1.38928e-78
MND1	C1	0.302514	0.683	0.075	1.27697e-81	2.47272e-77
POLQ	C1	0.296881	0.691	0.086	1.43173e-79	2.7724e-75
CENPA	C1	0.341876	0.545	0.039	1.53031e-79	2.9633e-75
KIF20B	C1	0.942553	0.911	0.249	3.58838e-78	6.94854e-74
BRCA2	C1	0.306466	0.683	0.082	5.24991e-78	1.01659e-73
GINS1	C1	0.342105	0.797	0.144	1.32851e-76	2.57253e-72
TRIP13	C1	0.34266	0.813	0.142	2.26642e-76	4.38869e-72
ECT2	C1	0.668344	0.902	0.242	1.03874e-75	2.01141e-71
CENPM	C1	0.574114	0.846	0.185	1.91809e-74	3.71419e-70
MELK	C1	0.325956	0.715	0.105	1.46387e-73	2.83464e-69
UHRF1	C1	0.293051	0.659	0.081	2.93112e-73	5.67581e-69
PIF1	C1	0.358466	0.415	0.019	3.49777e-73	6.77308e-69
GINS2	C1	0.61556	0.894	0.21	1.39895e-72	2.70893e-68
CDKN3	C1	0.861821	0.837	0.201	1.81196e-70	3.50868e-66
PARPBP	C1	0.26888	0.699	0.106	3.69573e-70	7.1564e-66
NCAPG2	C1	0.291362	0.748	0.131	9.76913e-70	1.89169e-65
SMC4	C1	1.55774	0.992	0.637	1.96977e-68	3.81426e-64
CDC6	C1	0.660583	0.756	0.139	3.35466e-68	6.49596e-64
POC1A	C1	0.319645	0.74	0.134	9.0168e-68	1.74601e-63
CDT1	C1	0.450235	0.74	0.129	5.62037e-67	1.08833e-62
PKMYT1	C1	0.261216	0.545	0.056	9.9088e-67	1.91874e-62
CHAF1A	C1	0.617138	0.813	0.192	1.22238e-66	2.36701e-62
DTL	C1	0.338573	0.577	0.067	7.798e-66	1.51e-61
GINS4	C1	0.308516	0.789	0.153	1.32871e-65	2.57291e-61
ATAD2	C1	0.92778	0.959	0.419	5.13137e-65	9.93638e-61
CENPW	C1	0.555703	0.878	0.228	8.59425e-65	1.66419e-60
CLSPN	C1	0.750786	0.715	0.128	1.08125e-64	2.09372e-60
CIP2A	C1	0.351916	0.772	0.168	5.10254e-63	9.88056e-59
HMGB2	C1	1.69527	0.992	0.749	2.43622e-62	4.7175e-58
SAPCD2	C1	0.284376	0.593	0.08	2.95434e-62	5.72078e-58
KIF18A	C1	0.256494	0.504	0.051	3.86008e-62	7.47467e-58
DEK	C1	1.12434	1	0.981	8.71747e-62	1.68805e-57
C21orf58	C1	0.372464	0.772	0.175	5.33392e-61	1.03286e-56
CCNB1	C1	1.31363	0.829	0.243	2.10342e-60	4.07306e-56
SGO2	C1	0.731139	0.854	0.265	4.32436e-60	8.37368e-56
CKAP2	C1	0.915737	0.967	0.469	2.88405e-59	5.58468e-55
RRM1	C1	0.8926	0.984	0.595	6.23826e-59	1.20798e-54
TUBA1B	C1	1.82754	1	0.993	3.35147e-58	6.48978e-54
HMGB1	C1	1.33735	1	0.999	8.20774e-58	1.58935e-53
ATAD5	C1	0.304958	0.724	0.147	8.72312e-58	1.68914e-53
VRK1	C1	0.429472	0.854	0.265	1.25376e-57	2.42778e-53
MASTL	C1	0.30688	0.715	0.151	4.20764e-57	8.14768e-53
CBX5	C1	0.823741	1	0.987	1.96542e-56	3.80583e-52
H2AFZ	C1	1.25922	1	0.997	4.64e-56	8.98491e-52
ZWILCH	C1	0.342992	0.894	0.295	1.25993e-55	2.43973e-51
NUCKS1	C1	1.08193	1	0.999	2.20059e-55	4.26123e-51
HMGN2	C1	1.23564	1	0.983	2.4081e-55	4.66305e-51
CKS1B	C1	1.34626	0.992	0.894	6.54464e-55	1.2673e-50
PTTG1	C1	1.63499	0.911	0.377	8.2408e-55	1.59575e-50
CENPH	C1	0.479594	0.878	0.297	1.09051e-53	2.11167e-49
DHFR	C1	1.09619	0.992	0.667	1.1046e-53	2.13894e-49
RTKN2	C1	0.256642	0.626	0.114	1.11895e-53	2.16673e-49
UBE2T	C1	0.881763	0.927	0.501	6.07232e-53	1.17584e-48
ZNF519	C1	0.254244	0.724	0.162	6.63283e-53	1.28438e-48
RMI2	C1	0.395826	0.797	0.215	2.11225e-52	4.09016e-48
KIF22	C1	0.633164	0.935	0.451	7.19611e-52	1.39346e-47
LIG1	C1	0.319919	0.78	0.202	8.09737e-52	1.56798e-47
TMSB15A	C1	0.376119	0.764	0.186	1.05868e-51	2.05003e-47
DSN1	C1	0.279206	0.691	0.16	2.03426e-51	3.93915e-47
POLA2	C1	0.3817	0.789	0.234	2.26489e-51	4.38574e-47
CKS2	C1	1.0584	0.959	0.545	7.38697e-51	1.43041e-46
PHF19	C1	0.608498	0.862	0.331	2.25206e-50	4.36088e-46
SMC2	C1	0.681518	0.992	0.601	8.14111e-50	1.57644e-45
ORC6	C1	0.730028	0.894	0.425	1.02756e-49	1.98977e-45
BRCA1	C1	0.392067	0.772	0.214	1.64507e-49	3.18552e-45
NASP	C1	1.00336	1	0.923	1.81487e-49	3.51432e-45
CDC25B	C1	0.508739	0.854	0.319	9.02903e-49	1.74838e-44
CCNF	C1	0.315339	0.618	0.125	1.32365e-48	2.56312e-44
CENPN	C1	0.495927	0.902	0.397	1.90493e-48	3.68871e-44
AURKA	C1	1.13722	0.862	0.35	4.40902e-48	8.53762e-44
MIS18BP1	C1	0.440738	0.829	0.287	9.68073e-48	1.87458e-43
FEN1	C1	0.558375	0.829	0.291	2.27993e-47	4.41486e-43
HNRNPA2B1	C1	0.815306	1	0.998	3.04382e-47	5.89406e-43
SKA2	C1	0.704354	0.992	0.862	7.47691e-47	1.44783e-42
CCDC18	C1	0.281916	0.797	0.238	1.09502e-46	2.12039e-42
CSE1L	C1	0.64105	0.984	0.859	1.94717e-46	3.7705e-42
RFC3	C1	0.27556	0.699	0.171	4.20263e-46	8.13797e-42
UBE2S	C1	1.73029	1	0.96	6.1066e-46	1.18248e-41
H2AFV	C1	0.802982	1	0.974	1.11551e-45	2.16007e-41
POLE	C1	0.276374	0.659	0.161	1.63104e-45	3.15835e-41
DLEU2	C1	0.307449	0.65	0.153	3.10627e-45	6.01499e-41
TIMELESS	C1	0.384185	0.862	0.334	5.2636e-45	1.01924e-40
TUBB	C1	1.09845	1	0.998	6.6103e-45	1.28002e-40
NSD2	C1	0.601498	1	0.838	1.49875e-44	2.90218e-40
DTYMK	C1	0.583921	0.967	0.655	2.10342e-44	4.07306e-40
KPNB1	C1	0.623775	1	1	2.3733e-44	4.59566e-40
NCAPD2	C1	0.617772	0.886	0.458	2.40409e-44	4.65528e-40
HMGB3	C1	0.797911	0.984	0.858	8.61046e-44	1.66733e-39
GMNN	C1	0.70717	0.951	0.604	1.55951e-43	3.01984e-39
STMN1	C1	1.08229	1	0.991	5.24966e-43	1.01654e-38
LMNB1	C1	0.482933	0.911	0.46	1.17356e-42	2.27248e-38
KPNA2	C1	1.7096	0.976	0.909	2.24708e-42	4.35125e-38
TUBB4B	C1	1.34197	0.992	0.975	3.92622e-42	7.60274e-38
CCDC34	C1	0.679282	0.992	0.639	4.41802e-42	8.55506e-38
KNSTRN	C1	0.643703	0.87	0.411	4.78672e-42	9.26901e-38
FUS	C1	0.703777	1	0.986	5.47886e-42	1.06093e-37
COL9A1	C1	0.251848	0.593	0.127	5.65482e-42	1.095e-37
MAP3K20	C1	0.774379	1	0.915	6.70249e-42	1.29787e-37
MMS22L	C1	0.335393	0.724	0.219	9.23583e-41	1.78843e-36
H2AFX	C1	0.728483	0.919	0.548	1.36035e-40	2.63418e-36
CDC25A	C1	0.330329	0.764	0.262	2.17847e-40	4.2184e-36
CBX3	C1	0.575915	1	0.988	2.68171e-40	5.19287e-36
[truncated: 967 more rows]
