# Supplementary material for: Single-cell transcriptomic profiling reveals specific maturation signatures in human cardiomyocytes derived from LMNB2-inactivated induced pluripotent stem cells
Source: Front Cell Dev Biol. 2022 Nov 28;10:895162. doi: 10.3389/fcell.2022.895162 (PMC9742441; doi:10.3389/fcell.2022.895162)
Supplement: Supplementary file 2 [file Table3.XLSX]

## Sheet: Up in Control
gene	cluster	avg_log2FC	pct.1	pct.2	p_val	p_val_adj
LEFTY2	C4	0.640276	0.679	0.147	2.95007e-19	5.71252e-15
PMEPA1	C4	0.374456	0.804	0.357	8.03163e-14	1.55524e-09
RAI14	C4	0.560645	0.946	0.718	2.40389e-13	4.6549e-09
EMC10	C4	0.561938	1	1	7.50215e-11	1.45272e-06
DPYSL3	C4	0.709109	1	0.962	1.08616e-10	2.10324e-06
CRABP2	C4	1.21482	0.911	0.655	1.16331e-10	2.25263e-06
MYOCD	C4	0.565719	1	0.941	1.42899e-10	2.76709e-06
TNNC1	C4	0.735942	1	1	1.75959e-10	3.40727e-06
FZD2	C4	0.479182	0.893	0.773	5.60216e-10	1.0848e-05
GADD45B	C4	0.333345	0.607	0.235	6.97338e-10	1.35032e-05
TRIB1	C4	0.393832	0.875	0.643	1.10586e-09	2.14139e-05
SMPX	C4	0.498588	1	0.992	1.62368e-09	3.14408e-05
A2M	C4	0.459413	0.268	0.034	1.91393e-09	3.70613e-05
LRATD2	C4	0.389106	0.911	0.676	3.93233e-09	7.61457e-05
NPPB	C4	1.74287	0.839	0.517	9.26154e-09	0.00017934
BAMBI	C4	0.717609	0.964	0.966	9.66858e-09	0.000187222
ATXN1	C4	0.380414	0.929	0.857	1.75978e-08	0.000340764
UGP2	C4	0.583314	1	1	1.97658e-08	0.000382744
TAGLN	C4	0.884423	0.964	0.845	4.03257e-08	0.000780868
FSCN1	C4	0.451248	1	0.958	4.0971e-08	0.000793363
KIFAP3	C4	0.447704	0.929	0.945	4.95366e-08	0.000959226
PALLD	C4	0.355819	1	0.996	5.78375e-08	0.00111996
WLS	C4	0.310569	1	0.92	5.87393e-08	0.00113743
LAPTM4B	C4	0.435265	1	1	6.37712e-08	0.00123487
RGS5	C4	0.522434	0.929	0.845	7.73301e-08	0.00149742
SYNPO2L	C4	0.688142	1	0.962	1.33886e-07	0.00259257
SORBS2	C4	0.408262	0.982	0.987	1.75489e-07	0.00339818
ACTC1	C4	0.724705	1	1	2.33723e-07	0.0045258
SELENOH	C4	0.350981	1	0.992	4.58852e-07	0.00888522
SSR4	C4	0.423113	1	0.992	5.86545e-07	0.0113578
NDUFB3	C4	0.391747	1	0.979	7.7544e-07	0.0150156
ATP5IF1	C4	0.416043	1	0.996	8.03772e-07	0.0155642
H3F3A	C4	0.319818	1	1	8.33049e-07	0.0161312
PDIA6	C4	0.561851	1	0.992	8.94712e-07	0.0173252
CDH2	C4	0.285946	1	1	8.98709e-07	0.0174026
GLRX	C4	0.502458	0.857	0.685	9.2908e-07	0.0179907
EHD3	C4	0.327137	0.911	0.748	9.5912e-07	0.0185724
SDF2L1	C4	0.439891	0.839	0.643	9.89771e-07	0.0191659
CALR	C4	0.754159	1	0.983	1.04991e-06	0.0203305
HMCES	C4	0.333062	0.875	0.777	1.22743e-06	0.023768
JAG1	C4	0.38764	0.911	0.798	1.29624e-06	0.0251005
CXXC4	C4	0.251782	0.714	0.445	1.40248e-06	0.0271577
ENO3	C4	0.477342	1	0.992	1.53275e-06	0.0296802
ADI1	C4	0.290758	0.946	0.786	1.77764e-06	0.0344223
FILIP1	C4	0.35445	1	0.992	1.84015e-06	0.0356327
REX1BD	C4	0.267338	0.982	0.882	2.2389e-06	0.0433541
PEA15	C4	0.304823	1	0.916	2.58779e-06	0.05011
DYNLL1	C4	0.351087	1	1	3.18644e-06	0.0617023
RPN2	C4	0.366795	0.982	0.979	3.42406e-06	0.0663035
RBFOX2	C4	0.394281	0.964	0.945	3.61237e-06	0.06995
CAVIN1	C4	0.358333	0.946	0.857	3.72179e-06	0.0720687
PKDCC	C4	0.453712	0.964	0.899	3.90568e-06	0.0756295
IGFBP6	C4	0.271326	0.696	0.445	4.27144e-06	0.0827121
ANKRD1	C4	0.839526	0.964	0.887	4.41675e-06	0.085526
CALM2	C4	0.299728	1	1	4.50106e-06	0.0871586
HSP90B1	C4	0.75765	0.982	0.992	5.10101e-06	0.098776
S100A10	C4	0.759201	0.643	0.374	6.90972e-06	0.1338
SIPA1L2	C4	0.36661	1	1	7.27547e-06	0.140882
BZW1	C4	0.265735	0.946	0.975	7.45422e-06	0.144344
TOP1	C4	0.270073	1	0.937	8.34791e-06	0.161649
CAMK2D	C4	0.396619	1	0.992	8.92131e-06	0.172752
SELENOW	C4	0.307475	1	1	9.21567e-06	0.178452
TNNT1	C4	0.25592	0.446	0.202	9.60106e-06	0.185915
MASP1	C4	0.365136	0.911	0.761	1.00429e-05	0.194471
CIAO2B	C4	0.286835	0.982	0.979	1.24641e-05	0.241355
BEX1	C4	0.529975	0.964	0.941	1.27983e-05	0.247827
CALB2	C4	0.413578	0.554	0.277	1.4343e-05	0.277738
CNN1	C4	0.328211	0.982	0.929	1.45863e-05	0.282449
KRT18	C4	0.483335	1	0.996	1.56383e-05	0.302821
SPARC	C4	0.512119	0.929	0.815	1.648e-05	0.31912
ACTN2	C4	0.45043	1	1	1.77432e-05	0.34358
VMP1	C4	0.3635	0.875	0.819	1.89648e-05	0.367234
KRT8	C4	0.422349	1	0.996	1.90432e-05	0.368752
SRP14	C4	0.274451	1	1	2.20915e-05	0.427779
ATP2A2	C4	0.43364	1	1	2.27899e-05	0.441304
SORT1	C4	0.265617	0.946	0.887	2.37322e-05	0.459551
TIMP1	C4	0.400244	0.911	0.908	2.38889e-05	0.462586
TRMT112	C4	0.311668	0.964	0.966	2.75383e-05	0.533252
DNAJA1	C4	0.345244	0.929	0.958	3.00649e-05	0.582177
SARAF	C4	0.289541	1	0.992	3.07946e-05	0.596306
MLEC	C4	0.360304	0.964	0.958	3.2718e-05	0.633551
POMP	C4	0.274273	1	0.996	3.45337e-05	0.668711
SELENOM	C4	0.268915	0.768	0.601	3.61903e-05	0.70079
PLD3	C4	0.335484	1	0.996	3.78315e-05	0.732568
PAIP2	C4	0.273589	0.964	0.945	3.86557e-05	0.748529
HSPA5	C4	0.600973	1	0.975	4.11121e-05	0.796095
SEC61G	C4	0.294204	0.982	0.992	4.26951e-05	0.826749
TMEM14B	C4	0.41152	0.982	0.996	4.31806e-05	0.83615
MGST3	C4	0.337636	0.964	1	4.4001e-05	0.852036
HACD1	C4	0.283482	1	1	4.43334e-05	0.858472
MACF1	C4	0.268385	0.982	0.996	4.48361e-05	0.868206
PDLIM2	C4	0.258692	0.714	0.458	4.85334e-05	0.939801
EMP2	C4	0.43133	0.982	0.979	5.0168e-05	0.971452
SCAF11	C4	0.289666	0.964	0.966	5.18686e-05	1
RPL36AL	C4	0.287049	1	0.992	5.22744e-05	1
PKP2	C4	0.369375	0.982	0.983	5.71539e-05	1
KRTCAP2	C4	0.265157	0.964	0.962	5.75564e-05	1
SKIL	C4	0.270566	0.911	0.891	5.78611e-05	1
DNAJB11	C4	0.360957	0.911	0.819	5.95337e-05	1
SSB	C4	0.278272	0.982	0.979	6.40985e-05	1
MZT2B	C4	0.254778	1	1	7.07974e-05	1
PDIA4	C4	0.447756	0.839	0.777	7.28136e-05	1
ITGAV	C4	0.295594	0.964	0.84	7.85231e-05	1
CD63	C4	0.268879	1	0.996	8.07565e-05	1
RBM38	C4	0.344132	1	0.983	8.55939e-05	1
PDGFRA	C4	0.57429	0.714	0.487	8.72954e-05	1
ZNF704	C4	0.294117	0.821	0.668	8.85399e-05	1
PDIA3	C4	0.392112	0.982	0.933	9.1224e-05	1
PSMB3	C4	0.26409	1	0.962	9.20087e-05	1
NEXN	C4	0.357972	1	1	9.82091e-05	1
GTF2I	C4	0.296861	1	1	9.96345e-05	1
RABAC1	C4	0.260332	0.982	0.992	0.000102543	1
COL2A1	C4	0.498681	1	0.992	0.000107829	1
TNFRSF12A	C4	0.421946	0.821	0.676	0.000109484	1
COL1A2	C4	0.312191	0.357	0.147	0.000110526	1
BMP7	C4	0.381163	0.982	0.899	0.000115268	1
UBL5	C4	0.256604	1	1	0.000127064	1
CRYAB	C4	0.417374	0.946	0.966	0.000131599	1
PFN1	C4	0.271222	1	1	0.000133531	1
LGR4	C4	0.337404	0.946	0.803	0.000134595	1
NPPA	C4	0.940803	1	0.958	0.000135395	1
GUK1	C4	0.261782	0.982	1	0.000160374	1
HOMER1	C4	0.264876	0.946	0.836	0.000170035	1
RNF115	C4	0.258549	0.964	0.941	0.000174196	1
GAMT	C4	0.260952	0.982	0.975	0.00018183	1
SH3BGRL3	C4	0.279176	0.875	0.794	0.000188412	1
RPS26	C4	0.259743	1	0.996	0.000193572	1
H2AFV	C4	0.262446	0.982	0.962	0.000203823	1
CFL1	C4	0.298331	1	1	0.000204587	1
EXT1	C4	0.259026	0.893	0.845	0.000206969	1
EIF5B	C4	0.267003	0.982	1	0.000213231	1
AEBP1	C4	0.340487	1	0.987	0.000219182	1
LSM4	C4	0.295411	1	0.971	0.000225269	1
NDUFV2	C4	0.273583	0.982	0.992	0.000231557	1
VCP	C4	0.34424	1	0.996	0.000239623	1
MYH7	C4	1.53452	0.696	0.525	0.000249345	1
BTG1	C4	0.443289	1	0.987	0.000261839	1
MGST1	C4	0.362085	0.875	0.765	0.000264894	1
SELENOK	C4	0.389344	1	0.95	0.000265298	1
PALM2-AKAP2	C4	0.281685	1	1	0.00028023	1
NECTIN2	C4	0.280774	0.929	0.937	0.000293262	1
FZD7	C4	0.35433	0.839	0.672	0.000293765	1
PPIB	C4	0.40852	0.982	0.975	0.000298787	1
BZW2	C4	0.259714	0.982	0.996	0.00030698	1
CXXC5	C4	0.274551	0.946	0.916	0.000419985	1
P4HB	C4	0.299964	0.982	0.979	0.000425489	1
FSTL1	C4	0.430119	0.964	0.924	0.00043168	1
ME2	C4	0.268803	0.929	0.824	0.000432979	1
BMP2	C4	0.529385	0.786	0.66	0.000452886	1
NCAM1	C4	0.259975	0.964	0.941	0.000470636	1
TUBB6	C4	0.265429	0.982	0.929	0.000497306	1
CCDC34	C4	0.350826	0.696	0.508	0.000505982	1
ATP13A3	C4	0.277059	0.946	0.933	0.000511976	1
TTC3	C4	0.253107	1	0.996	0.000516219	1
DAD1	C4	0.333089	0.982	0.962	0.000578091	1
SVIL	C4	0.27631	1	0.992	0.000591441	1
SEC61B	C4	0.251546	1	0.979	0.000616699	1
TMSB4X	C4	0.298609	0.982	0.924	0.000625645	1
CALD1	C4	0.330415	0.946	0.874	0.000633246	1
ITGB1	C4	0.253371	1	1	0.000638887	1
C12orf75	C4	0.404124	0.929	0.929	0.000653986	1
XRCC6	C4	0.272263	1	0.975	0.00069202	1
SEPTIN7	C4	0.251745	1	0.996	0.00071673	1
HSPB3	C4	0.34185	0.929	0.903	0.000750521	1
PRDX4	C4	0.265976	0.875	0.87	0.000760894	1
CDC42EP3	C4	0.275845	0.911	0.874	0.000765515	1
GSTO1	C4	0.476101	0.982	0.958	0.000828768	1
POPDC2	C4	0.290647	0.982	1	0.000888318	1
S100A13	C4	0.258163	0.929	0.887	0.000968824	1
ANXA2	C4	0.32237	0.982	0.908	0.00102871	1
NUAK1	C4	0.257589	0.732	0.597	0.00102997	1
NT5DC2	C4	0.27991	0.893	0.941	0.00103609	1
BANCR	C4	0.41907	0.589	0.374	0.00112022	1
CYBA	C4	0.302748	0.768	0.563	0.00121588	1
CETN2	C4	0.274955	0.893	0.824	0.00124048	1
PDLIM3	C4	0.26866	0.571	0.391	0.00125946	1
MYL7	C4	0.425309	1	1	0.00138425	1
ISOC2	C4	0.293991	0.929	0.929	0.00143254	1
NAV2	C4	0.274261	0.929	0.878	0.00158261	1
G3BP2	C4	0.293244	1	1	0.00163831	1
PRDX1	C4	0.541481	0.982	0.996	0.00165306	1
CMYA5	C4	0.290334	0.946	0.912	0.00175994	1
CCN2	C4	0.89077	0.482	0.345	0.00178402	1
ADPRHL1	C4	0.266805	0.929	0.84	0.00190531	1
AL136171.2	C4	0.447271	0.893	0.945	0.00194338	1
CXCL12	C4	0.275413	0.786	0.655	0.00208807	1
SFRP1	C4	0.29184	0.982	0.983	0.002227	1
DYNLT1	C4	0.250912	1	0.996	0.00224008	1
GNG10	C4	0.258954	0.964	0.945	0.00231811	1
JPT1	C4	0.271963	0.982	0.937	0.00273211	1
HSPB1	C4	0.259763	1	1	0.00295338	1
HSP90AA1	C4	0.291849	1	1	0.00323375	1
PABPC4	C4	0.282963	1	0.933	0.00340891	1
MANF	C4	0.409761	0.929	0.849	0.0035961	1
NES	C4	0.303908	0.982	1	0.00404391	1
ASB2	C4	0.40726	0.982	0.941	0.00410907	1
CCN1	C4	0.392761	0.589	0.458	0.00462253	1
MEF2C	C4	0.387109	1	0.95	0.00472773	1
OSTC	C4	0.282671	0.982	0.958	0.00597769	1
TMEM141	C4	0.331439	0.982	0.975	0.00637225	1
TPM2	C4	0.278336	0.982	0.987	0.0077976	1
MAGED1	C4	0.28034	0.982	0.992	0.00823294	1
CANX	C4	0.29697	1	0.996	0.0109973	1
TXNDC17	C4	0.307125	0.982	0.987	0.0115882	1
KCNIP2	C4	0.34432	0.411	0.265	0.012048	1
COPB2	C4	0.290715	0.982	0.941	0.0124448	1
PRICKLE1	C4	0.256714	1	0.992	0.0171347	1
AKR1B1	C4	0.380941	0.929	0.937	0.0188148	1
DNAJB9	C4	0.285264	0.929	0.878	0.0202974	1
HMGB1	C4	0.284391	1	1	0.0210584	1
MFGE8	C4	0.311724	0.929	0.929	0.0265384	1
ACTA2	C4	0.377554	0.482	0.328	0.0268981	1
IVNS1ABP	C4	0.289153	0.929	0.924	0.0308586	1
TUBA1B	C4	0.266261	1	0.983	0.0311659	1
GSTP1	C4	0.252807	1	0.996	0.0420875	1
TMEM88	C4	0.263821	0.714	0.693	0.0435873	1
COL5A2	C4	0.289414	0.821	0.71	0.0440254	1
S100A11	C4	0.25669	0.554	0.496	0.0552094	1
TGM2	C4	0.27886	0.821	0.798	0.0553672	1
STMN1	C4	0.313333	1	0.992	0.0567642	1
SRSF7	C4	0.293841	0.929	0.933	0.0653993	1
GADD45G	C4	0.269738	0.321	0.227	0.071865	1
DGKI	C4	0.30075	0.893	0.882	0.108686	1
TNNI3	C4	0.339608	0.786	0.718	0.157357	1
THBS1	C4	0.310824	0.446	0.378	0.183129	1
PAM	C4	0.374899	0.982	0.992	0.218407	1
IGFBP7	C4	0.319477	0.607	0.584	0.316079	1
PGAM2	C4	0.251464	0.839	0.874	0.33212	1
PTTG1	C4	0.27115	0.339	0.319	0.466123	1
UNC5B-AS1	C4	0.418082	0.661	0.651	0.673621	1
LEFTY2	C2	0.664939	0.667	0.125	6.10141e-24	1.18148e-19
FZD2	C2	0.636433	0.989	0.8	1.80171e-22	3.48883e-18
PMEPA1	C2	0.465147	0.885	0.44	7.87425e-20	1.52477e-15
LRATD2	C2	0.465887	0.908	0.6	1.60341e-17	3.10485e-13
TAGLN	C2	1.42259	1	0.85	4.50314e-17	8.71988e-13
TMSB4X	C2	0.861981	1	0.97	7.92551e-16	1.5347e-11
RAI14	C2	0.446471	0.92	0.635	1.7624e-15	3.41272e-11
NPPB	C2	1.55953	0.92	0.52	2.28662e-14	4.42781e-10
ACTN1	C2	0.596745	0.989	0.945	7.69098e-13	1.48928e-08
GSTP1	C2	0.662201	1	0.995	9.70905e-13	1.88006e-08
FSCN1	C2	0.424364	0.989	0.95	9.77393e-12	1.89262e-07
PDLIM3	C2	0.93133	0.897	0.65	1.44323e-11	2.79467e-07
PACS1	C2	0.357162	0.977	0.86	4.76363e-11	9.22428e-07
PITPNM1	C2	0.483597	0.874	0.735	6.01168e-11	1.1641e-06
CALD1	C2	0.694097	1	0.88	1.86598e-10	3.61329e-06
BAMBI	C2	0.498246	0.966	0.935	5.33398e-10	1.03287e-05
COL5A1	C2	0.461716	0.828	0.68	7.7556e-10	1.50179e-05
CNN1	C2	0.510059	0.989	0.925	8.45118e-10	1.63649e-05
CCDC80	C2	0.301017	0.609	0.235	1.05115e-09	2.03544e-05
S100A10	C2	0.725071	0.897	0.61	1.86989e-09	3.62086e-05
CRABP2	C2	0.932514	0.897	0.71	3.91506e-09	7.58112e-05
CDH2	C2	0.407099	0.989	0.955	4.32677e-09	8.37835e-05
NPPA	C2	1.30241	1	0.86	7.26109e-09	0.000140604
CCN2	C2	0.385131	0.621	0.285	7.49175e-09	0.00014507
MYH11	C2	0.369137	0.575	0.24	7.51634e-09	0.000145546
ENO3	C2	0.529629	1	0.985	1.68798e-08	0.00032686
TPM4	C2	0.368092	1	0.965	2.39197e-08	0.000463181
SIPA1L2	C2	0.403699	1	0.965	2.50072e-08	0.00048424
CDC42EP1	C2	0.355707	0.862	0.64	2.8256e-08	0.000547149
HMGA1	C2	0.493312	0.989	0.99	4.28247e-08	0.000829257
DPYSL3	C2	0.406649	0.977	0.94	8.83883e-08	0.00171155
PKDCC	C2	0.372196	0.943	0.915	1.04757e-07	0.00202852
HSP90AA1	C2	0.516961	1	1	1.24406e-07	0.002409
TNFRSF12A	C2	0.5436	0.954	0.8	1.45875e-07	0.00282473
WDR1	C2	0.290943	1	0.985	1.81582e-07	0.00351614
MYH9	C2	0.392876	0.989	0.935	2.06289e-07	0.00399458
CNPY2	C2	0.265354	0.977	0.96	2.2908e-07	0.0044359
ANKRD1	C2	0.772036	0.931	0.72	2.3522e-07	0.0045548
CXXC5	C2	0.412248	0.943	0.95	2.42411e-07	0.00469405
SKIL	C2	0.315777	0.966	0.895	2.80684e-07	0.00543517
SOX4	C2	0.417617	0.954	0.84	2.90547e-07	0.00562615
SSR4	C2	0.317534	1	0.995	3.4306e-07	0.00664302
CAMK2D	C2	0.286713	1	0.965	4.17046e-07	0.00807569
LAPTM4B	C2	0.43989	1	0.995	4.56019e-07	0.00883036
CDK2AP2	C2	0.497281	0.966	0.93	5.38751e-07	0.0104324
VMP1	C2	0.26285	0.943	0.78	6.60026e-07	0.0127807
TIMP1	C2	0.256656	1	0.92	8.69742e-07	0.0168417
COTL1	C2	0.325534	0.885	0.69	1.15769e-06	0.0224175
ROGDI	C2	0.311754	0.989	0.93	1.21022e-06	0.0234347
TMPO	C2	0.277492	0.943	0.885	1.36314e-06	0.0263959
SERPINE2	C2	0.607711	0.747	0.555	1.37759e-06	0.0266757
KRT18	C2	0.547253	1	1	1.55454e-06	0.0301022
MYOCD	C2	0.320186	0.885	0.79	2.84289e-06	0.0550498
DNAJC15	C2	0.361235	0.989	0.87	3.47661e-06	0.067321
TUBB	C2	0.335726	1	1	4.47035e-06	0.0865639
EMC10	C2	0.462202	0.989	0.95	4.51756e-06	0.0874779
PDLIM7	C2	0.306556	0.989	0.95	5.08454e-06	0.098457
TGIF1	C2	0.258576	0.908	0.81	6.67244e-06	0.129205
NGFR	C2	0.31028	0.586	0.32	8.51481e-06	0.164881
MASP1	C2	0.334058	0.77	0.49	9.86319e-06	0.190991
PEA15	C2	0.285962	0.977	0.95	1.01341e-05	0.196236
HACD1	C2	0.278517	1	0.98	1.12068e-05	0.217008
NRP2	C2	0.347511	0.954	0.825	1.30508e-05	0.252716
TUBB6	C2	0.25246	1	0.955	1.77112e-05	0.342959
PALLD	C2	0.280614	0.989	0.94	2.07663e-05	0.402118
SELENOM	C2	0.253949	0.862	0.74	3.03059e-05	0.586843
ACTC1	C2	0.553378	1	0.985	3.1348e-05	0.607022
TGM2	C2	0.34571	0.793	0.665	6.03027e-05	1
FSTL1	C2	0.277515	0.92	0.845	6.04539e-05	1
SPARC	C2	0.260263	0.793	0.66	6.60721e-05	1
IVNS1ABP	C2	0.334241	0.954	0.9	6.70128e-05	1
GDF15	C2	0.264	0.46	0.23	8.11331e-05	1
KIFAP3	C2	0.254498	0.931	0.865	0.000102432	1
PRICKLE1	C2	0.25898	0.966	0.93	0.000110303	1
TNNC1	C2	0.451801	1	0.98	0.000135184	1
MGST1	C2	0.308428	0.897	0.86	0.00014335	1
SFRP1	C2	0.387319	0.954	0.91	0.000157475	1
TIMP3	C2	0.289279	0.977	0.9	0.000249386	1
CALR	C2	0.397433	0.989	0.97	0.000259388	1
IGFBP7	C2	0.517554	0.724	0.59	0.0004192	1
SVIL	C2	0.258551	0.966	0.915	0.000419885	1
BEX1	C2	0.329	0.966	0.97	0.000482385	1
MT-ND5	C2	0.331299	0.966	0.92	0.000578974	1
RPL12	C2	0.257226	1	1	0.000661185	1
S100A11	C2	0.381709	0.943	0.885	0.000725715	1
TMSB10	C2	0.25503	1	0.99	0.000925187	1
KRT8	C2	0.341847	1	1	0.000935477	1
COL5A2	C2	0.2733	0.701	0.54	0.00111194	1
COL18A1	C2	0.254147	0.977	0.905	0.00122047	1
MYC	C2	0.299814	0.839	0.73	0.001342	1
ACTA1	C2	0.782983	0.736	0.575	0.00135212	1
BANCR	C2	0.277418	0.368	0.215	0.00148021	1
CCN1	C2	0.508354	0.563	0.435	0.00292197	1
FILIP1	C2	0.285246	0.966	0.93	0.00383126	1
AKR1B1	C2	0.263923	0.966	0.945	0.0042381	1
VCAN	C2	0.339118	0.931	0.845	0.00468516	1
TUBB2B	C2	0.268752	0.943	0.95	0.00530428	1
GAS5	C2	0.257976	1	1	0.00827246	1
MYH7	C2	0.345631	0.46	0.295	0.00940245	1
FLNC	C2	0.252034	1	0.985	0.0222323	1
ACTB	C2	0.336077	1	0.99	0.0531681	1
TUBA1A	C2	0.277613	0.977	0.975	0.0906153	1
H19	C2	0.357111	0.425	0.535	0.543517	1
LMNB2	C0	0.356091	0.78	0.109	3.15331e-17	6.10607e-13
CDKN2B	C0	0.943781	0.78	0.364	1.0348e-11	2.00378e-07
DPYSL3	C0	0.825611	0.935	0.8	3.0004e-10	5.80997e-06
ENC1	C0	0.750246	0.88	0.6	1.90876e-08	0.000369612
JPT1	C0	0.544026	0.98	0.982	7.85996e-08	0.001522
UBB	C0	0.503692	0.985	0.927	1.87425e-07	0.0036293
TMSB4X	C0	0.749113	1	1	1.89576e-07	0.00367095
SKIL	C0	0.480214	0.975	0.927	3.01209e-07	0.0058326
HMGA2	C0	0.574014	0.85	0.618	3.04911e-07	0.0059043
PACS1	C0	0.361004	0.965	0.855	3.57941e-07	0.00693117
NPPA	C0	1.00427	0.805	0.527	3.64882e-07	0.00706557
PAPPA	C0	0.567868	0.815	0.582	4.53291e-07	0.00877753
OCIAD2	C0	0.597594	0.94	0.836	4.87709e-07	0.009444
ENAH	C0	0.601537	1	0.982	6.0235e-07	0.0116639
CDH11	C0	0.691858	0.82	0.618	7.18555e-07	0.0139141
TNC	C0	0.722236	0.7	0.327	1.02176e-06	0.0197854
SMARCC1	C0	0.297929	0.985	0.982	1.64036e-06	0.0317639
ZNF706	C0	0.329954	0.99	1	2.8287e-06	0.054775
HMGB1	C0	0.465683	1	1	4.13583e-06	0.0800863
MARCKSL1	C0	0.568388	0.995	0.964	4.38904e-06	0.0849894
CFL1	C0	0.344093	1	1	4.84458e-06	0.0938105
DLC1	C0	0.473325	0.825	0.618	5.28213e-06	0.102283
TUBB3	C0	0.697934	0.94	0.855	5.86462e-06	0.113562
GSTO1	C0	0.455129	0.98	0.982	6.18932e-06	0.11985
TGFBI	C0	0.577467	0.685	0.382	6.50099e-06	0.125885
TAGLN2	C0	0.761868	0.95	0.891	6.87096e-06	0.133049
ENY2	C0	0.307604	0.99	0.964	1.06171e-05	0.20559
KCNMA1	C0	0.361506	0.7	0.4	1.14353e-05	0.221433
PDLIM2	C0	0.406459	0.915	0.818	1.16471e-05	0.225535
RAI14	C0	0.435007	0.975	0.891	1.16664e-05	0.225908
LIMA1	C0	0.372225	0.91	0.727	1.27991e-05	0.247843
YWHAZ	C0	0.347271	0.995	1	1.37095e-05	0.265471
JUNB	C0	0.395335	0.755	0.527	1.41116e-05	0.273256
TPM1	C0	0.604281	1	1	1.57808e-05	0.305579
GNAI2	C0	0.286313	0.985	0.982	1.87468e-05	0.363014
FHL3	C0	0.324863	0.925	0.855	1.88767e-05	0.365529
TYW3	C0	0.280209	0.685	0.436	2.40694e-05	0.46608
IER3	C0	0.467358	0.765	0.545	2.42351e-05	0.469289
COL5A2	C0	0.578783	0.965	0.945	2.51581e-05	0.487162
INHBA	C0	0.581955	0.675	0.4	2.64419e-05	0.512021
COTL1	C0	0.474723	0.99	0.927	2.76991e-05	0.536365
MARCKS	C0	0.509164	0.995	0.964	2.82106e-05	0.546271
LAMB1	C0	0.343576	0.93	0.782	2.92359e-05	0.566125
SERPINE2	C0	0.916188	0.95	0.836	3.95915e-05	0.766649
RPL23	C0	0.2778	1	1	4.1182e-05	0.797449
LOXL1	C0	0.340086	0.74	0.564	4.21354e-05	0.815909
EDIL3	C0	0.336352	0.845	0.6	4.46597e-05	0.86479
ARPC2	C0	0.27586	1	1	4.62304e-05	0.895205
NUAK1	C0	0.373543	0.82	0.582	4.90931e-05	0.95064
LIMS1	C0	0.383814	0.975	0.927	4.96043e-05	0.960538
COL4A1	C0	0.537917	0.935	0.818	6.08937e-05	1
TPBG	C0	0.266076	0.71	0.455	6.50364e-05	1
ACTR2	C0	0.314075	0.99	0.964	8.51526e-05	1
DBN1	C0	0.26002	0.975	0.964	9.19645e-05	1
SPP1	C0	0.591436	0.665	0.327	9.70895e-05	1
BAMBI	C0	0.676025	0.99	0.982	0.000102753	1
VMP1	C0	0.360437	0.98	0.964	0.000104504	1
COL4A2	C0	0.428744	0.95	0.873	0.000126615	1
RND3	C0	0.421076	0.87	0.618	0.000128175	1
PDLIM1	C0	0.306604	0.935	0.909	0.000135903	1
CALD1	C0	0.460144	0.995	1	0.000143868	1
PDLIM7	C0	0.355144	0.99	1	0.000174074	1
FSTL1	C0	0.451121	0.975	0.927	0.00021706	1
PLS3	C0	0.289525	0.96	0.855	0.000223899	1
CD59	C0	0.310889	0.97	0.927	0.000265622	1
CAP1	C0	0.311123	1	1	0.0002744	1
FSCN1	C0	0.272908	0.985	0.982	0.00028674	1
SYNPO	C0	0.271854	0.53	0.291	0.000340701	1
HEG1	C0	0.257637	0.77	0.618	0.000363108	1
AMOTL2	C0	0.30874	0.745	0.527	0.000371288	1
CYBA	C0	0.309938	0.77	0.509	0.000381931	1
NRP2	C0	0.413401	0.855	0.709	0.000389726	1
CDC42	C0	0.250049	1	1	0.000398132	1
TPM3	C0	0.261218	1	1	0.000398132	1
FJX1	C0	0.278601	0.72	0.545	0.00041193	1
MMP2	C0	0.457811	0.875	0.764	0.000453414	1
FILIP1L	C0	0.447021	0.79	0.618	0.00056543	1
CEP170	C0	0.278919	0.96	0.891	0.000585192	1
ARL6IP1	C0	0.436403	0.985	0.927	0.000613099	1
NTM	C0	0.255885	0.63	0.382	0.00066203	1
NCAM1	C0	0.29828	0.74	0.545	0.000736869	1
HNRNPA3	C0	0.315663	1	1	0.000757384	1
TMSB10	C0	0.337779	1	1	0.00079806	1
MYH9	C0	0.498518	0.97	0.982	0.000953305	1
PTMA	C0	0.284944	1	1	0.00105653	1
SOX4	C0	0.419976	0.995	0.964	0.00111999	1
FBLIM1	C0	0.263291	0.94	0.891	0.00117604	1
ACTN1	C0	0.386082	0.975	0.945	0.00152007	1
PALLD	C0	0.397791	0.965	0.891	0.00162505	1
VIM	C0	0.517589	0.995	1	0.00179466	1
S100A11	C0	0.385031	0.99	0.964	0.00189794	1
F2R	C0	0.291755	0.89	0.709	0.00205649	1
NET1	C0	0.258496	0.62	0.436	0.0021359	1
H3F3B	C0	0.264139	1	1	0.00221089	1
SFPQ	C0	0.289008	0.995	1	0.00222618	1
FKBP1A	C0	0.273681	0.995	1	0.0023682	1
CAVIN1	C0	0.32913	0.86	0.727	0.0024587	1
S100A10	C0	0.511895	0.995	0.982	0.00254434	1
LAPTM4A	C0	0.253857	0.99	1	0.00269563	1
ITM2C	C0	0.251499	0.985	0.964	0.00286463	1
ITGA3	C0	0.279413	0.78	0.745	0.00291327	1
PHLDA2	C0	0.313055	0.705	0.473	0.00301639	1
TPM4	C0	0.327599	0.985	0.982	0.00303323	1
LUM	C0	0.532641	0.495	0.273	0.00325237	1
IGFBP3	C0	0.83759	0.8	0.655	0.00325716	1
BASP1	C0	0.339625	0.995	0.927	0.00343167	1
LRATD2	C0	0.386651	0.65	0.527	0.00354266	1
HSPH1	C0	0.316944	0.96	0.909	0.00371292	1
RHOBTB3	C0	0.387717	0.995	0.982	0.0041396	1
SPARC	C0	0.494067	0.985	0.982	0.00480463	1
PFN1	C0	0.250052	1	1	0.00491399	1
TAGLN	C0	0.359128	0.99	0.964	0.00504156	1
ITGA2	C0	0.282258	0.395	0.2	0.0050979	1
TNFRSF12A	C0	0.486464	0.875	0.782	0.00533778	1
FBLN1	C0	0.354365	0.93	0.855	0.00542785	1
COL1A1	C0	0.700638	0.94	0.836	0.00553428	1
AUXG01000058.1	C0	0.456534	0.685	0.564	0.00623118	1
ACTG1	C0	0.367713	1	1	0.00637231	1
ITGB1	C0	0.337839	1	1	0.00657453	1
FLNB	C0	0.341791	0.945	0.891	0.00673232	1
KRT18	C0	0.589347	0.985	0.982	0.0074652	1
FRMD6	C0	0.259909	0.61	0.455	0.00787193	1
DUSP1	C0	0.334942	0.715	0.527	0.00819544	1
LOX	C0	0.262679	0.62	0.455	0.00853473	1
TUBA1C	C0	0.29682	0.935	0.909	0.00858068	1
SLC7A5	C0	0.384625	0.94	0.891	0.00865913	1
UACA	C0	0.405289	0.895	0.873	0.00881173	1
FN1	C0	0.577041	0.99	0.891	0.00915457	1
CCND2	C0	0.288212	0.97	0.982	0.00989785	1
CNN2	C0	0.287269	0.985	0.982	0.0117869	1
CELF2	C0	0.320233	0.88	0.818	0.0125742	1
MYH10	C0	0.369985	0.975	0.982	0.0127898	1
PODXL	C0	0.379037	0.515	0.345	0.0131702	1
SOX9	C0	0.330815	0.595	0.418	0.0132513	1
IL32	C0	0.401656	0.375	0.2	0.0137856	1
IGFBP7	C0	0.510919	0.935	0.855	0.014451	1
ACTG2	C0	0.525971	0.56	0.382	0.0164555	1
ANXA2	C0	0.398263	1	1	0.0178463	1
KRT8	C0	0.43426	0.985	1	0.0224838	1
MT2A	C0	0.36539	0.545	0.382	0.0240684	1
CLDN6	C0	0.355106	0.45	0.291	0.0300104	1
CKS2	C0	0.253932	0.835	0.691	0.0308379	1
HBEGF	C0	0.257861	0.54	0.436	0.0317	1
JUN	C0	0.365573	0.95	0.8	0.0345659	1
MYL12B	C0	0.302579	1	1	0.0373558	1
SFRP1	C0	0.543563	0.965	0.927	0.0384945	1
PLAU	C0	0.327717	0.29	0.164	0.0391476	1
ATP2B1	C0	0.319937	0.975	0.945	0.0401743	1
HMGA1	C0	0.325803	0.995	1	0.0412938	1
DSP	C0	0.488567	0.975	0.982	0.0439281	1
CYTOR	C0	0.254334	0.875	0.818	0.0471074	1
MEST	C0	0.533451	0.955	0.909	0.0508202	1
UGCG	C0	0.301709	0.85	0.873	0.0546424	1
COL5A1	C0	0.338861	0.86	0.818	0.0561915	1
BEX1	C0	0.435939	0.935	0.873	0.061385	1
APOE	C0	0.322014	0.945	0.891	0.0739502	1
RGS2	C0	0.266686	0.54	0.436	0.0888997	1
IGFBP5	C0	0.766565	0.77	0.745	0.0925601	1
AC108134.2	C0	0.358959	0.34	0.218	0.0984622	1
PEA15	C0	0.30322	0.95	0.945	0.104885	1
COL1A2	C0	0.253114	0.655	0.545	0.136494	1
SESN3	C0	0.303144	0.75	0.727	0.142513	1
UPP1	C0	0.30776	0.885	0.873	0.154004	1
PDLIM3	C0	0.431904	0.83	0.836	0.168481	1
TNNC1	C0	0.468514	0.705	0.582	0.169077	1
TPM2	C0	0.286965	0.99	1	0.178659	1
TUBA1A	C0	0.289751	0.98	0.964	0.181338	1
SAT1	C0	0.330831	0.885	0.873	0.184719	1
CSRP2	C0	0.342065	0.98	0.945	0.195907	1
TUBB4B	C0	0.252495	0.985	0.982	0.222462	1
LRRC75A	C0	0.267519	0.85	0.764	0.250358	1
CENPF	C0	0.355699	0.395	0.309	0.320927	1
CRABP2	C0	0.250342	0.935	0.927	0.342779	1
KLF6	C0	0.320362	0.915	0.909	0.365753	1
DLK1	C0	0.529017	0.405	0.364	0.532509	1
STMN2	C0	0.477765	0.245	0.309	0.540129	1
CSRP2	C3	0.988668	0.993	0.909	3.91958e-11	7.58988e-07
GSTP1	C3	0.86722	1	1	4.73696e-10	9.17264e-06
POP5	C3	0.373912	0.947	0.682	8.52464e-10	1.65071e-05
CRABP2	C3	1.26589	0.934	0.682	2.17416e-09	4.21004e-05
TXNDC17	C3	0.451753	0.974	0.977	2.60993e-09	5.05386e-05
JPT1	C3	0.494424	0.993	0.977	8.03677e-09	0.000155624
MIF	C3	0.414984	1	1	1.16034e-08	0.000224689
LRATD2	C3	0.479199	0.947	0.659	1.37309e-08	0.000265885
MYL6B	C3	0.388346	0.993	0.932	2.97215e-08	0.000575528
RAI14	C3	0.543477	0.987	0.955	9.38926e-08	0.00181814
DYNLL1	C3	0.379748	1	1	1.94441e-07	0.00376516
PDLIM2	C3	0.376979	0.854	0.614	2.33288e-07	0.00451738
LEFTY2	C3	0.494792	0.589	0.159	2.35241e-07	0.00455521
ETHE1	C3	0.266294	0.834	0.523	2.98376e-07	0.00577775
PKP2	C3	0.542933	0.987	1	3.26558e-07	0.00632347
WLS	C3	0.383054	0.987	0.864	3.31543e-07	0.00641999
EPHA2	C3	0.276438	0.887	0.614	3.37453e-07	0.00653444
SYTL5	C3	0.277333	0.728	0.273	4.12901e-07	0.00799541
SH3BGRL3	C3	0.31628	0.94	0.795	4.77757e-07	0.00925129
ARHGAP10	C3	0.336901	0.841	0.591	4.8425e-07	0.00937701
NPPB	C3	1.56736	1	0.977	6.26142e-07	0.0121246
CFL1	C3	0.412815	1	1	6.26142e-07	0.0121246
NAV1	C3	0.938449	0.947	0.682	1.37508e-06	0.026627
ENO3	C3	0.536226	1	1	1.55626e-06	0.0301354
GLRX	C3	0.666502	0.901	0.727	1.65115e-06	0.0319728
LAPTM4B	C3	0.415038	1	1	1.65348e-06	0.0320179
ZNHIT1	C3	0.277437	0.987	0.932	2.16769e-06	0.0419751
KIF5B	C3	0.327937	1	0.977	2.1681e-06	0.0419831
PALLD	C3	0.420409	1	1	2.37152e-06	0.0459221
SELENOH	C3	0.332893	1	1	2.47998e-06	0.0480224
PITPNM1	C3	0.456703	0.854	0.636	2.56485e-06	0.0496658
GPC6	C3	0.292671	0.881	0.636	2.5891e-06	0.0501354
SPARC	C3	0.602126	0.96	0.886	3.18402e-06	0.0616553
YBX1	C3	0.371652	1	1	3.23781e-06	0.0626969
PDLIM3	C3	0.784799	0.967	0.682	3.6044e-06	0.0697956
PDAP1	C3	0.29216	1	0.977	3.80543e-06	0.0736884
CCDC34	C3	0.352553	0.815	0.5	4.41632e-06	0.0855176
TPM4	C3	0.434923	1	1	4.46777e-06	0.0865139
TMA7	C3	0.317343	1	1	5.0905e-06	0.0985725
HACD1	C3	0.324684	1	1	6.05111e-06	0.117174
TRAPPC1	C3	0.301082	0.987	0.977	7.28662e-06	0.141098
FSTL1	C3	0.501096	0.98	0.977	8.10531e-06	0.156951
PEA15	C3	0.466818	1	0.955	8.39801e-06	0.162619
ITGB1BP2	C3	0.377088	0.954	0.841	8.42543e-06	0.16315
S100A11	C3	0.608368	0.914	0.659	9.18436e-06	0.177846
BAMBI	C3	0.531807	0.974	0.977	9.53354e-06	0.184607
IER3	C3	0.583056	0.901	0.705	9.58119e-06	0.18553
SRP14	C3	0.326366	1	1	1.0668e-05	0.206576
MGST1	C3	0.415196	0.98	0.955	1.08166e-05	0.209452
CDK2AP2	C3	0.633475	0.934	0.932	1.15665e-05	0.223974
FILIP1	C3	0.438076	1	1	1.17637e-05	0.227793
NBDY	C3	0.286308	0.987	1	1.19287e-05	0.230987
CEP170	C3	0.338472	0.974	0.886	1.24252e-05	0.240601
SORT1	C3	0.368715	0.967	0.932	1.89142e-05	0.366254
AKR1B1	C3	0.701687	0.987	0.932	2.09555e-05	0.405782
TAGLN	C3	0.591177	1	1	2.12448e-05	0.411385
LOXL2	C3	0.314078	0.828	0.591	2.3666e-05	0.458269
PFN1	C3	0.367176	1	1	2.39931e-05	0.464602
COL18A1	C3	0.297331	0.993	1	2.46481e-05	0.477287
POMP	C3	0.29399	1	1	2.60097e-05	0.503652
HNRNPM	C3	0.277144	0.993	0.955	2.63603e-05	0.510441
COTL1	C3	0.417929	0.921	0.795	2.82398e-05	0.546835
XRCC4	C3	0.535843	0.914	0.75	2.90346e-05	0.562226
COL5A1	C3	0.357132	0.775	0.5	2.99825e-05	0.580581
PNP	C3	0.258391	0.735	0.386	3.17468e-05	0.614744
PTTG1	C3	0.257971	0.583	0.205	3.69188e-05	0.714896
PAFAH1B3	C3	0.261183	0.927	0.795	3.76318e-05	0.728702
SRP9	C3	0.28248	0.987	0.955	4.1382e-05	0.801322
LSM4	C3	0.332679	0.987	0.977	4.193e-05	0.811932
FIBP	C3	0.276845	0.987	0.955	4.84051e-05	0.937316
TMEM160	C3	0.252077	0.98	0.795	4.86263e-05	0.9416
SSR4	C3	0.322222	0.987	1	4.90419e-05	0.949647
SIPA1L2	C3	0.344651	0.987	1	5.03329e-05	0.974647
HOPX	C3	0.297022	0.603	0.227	5.2446e-05	1
PPP1R14A	C3	0.323481	0.662	0.341	5.4977e-05	1
CCDC85B	C3	0.275474	0.96	0.818	5.56506e-05	1
REST	C3	0.268142	0.993	0.932	5.69144e-05	1
NEXN	C3	0.336854	1	1	6.2685e-05	1
TMSB4X	C3	0.498378	1	1	6.2685e-05	1
CKB	C3	0.590975	0.993	1	6.76923e-05	1
ADAMTSL4	C3	0.365961	0.848	0.636	8.17119e-05	1
IGFBP7	C3	0.780432	0.894	0.75	8.53874e-05	1
TNNC1	C3	0.513562	1	1	9.17628e-05	1
TIMP1	C3	0.272023	0.993	0.932	9.70885e-05	1
S100A10	C3	0.672736	0.974	0.841	9.87949e-05	1
DAD1	C3	0.300118	0.987	0.977	0.00010144	1
SMS	C3	0.332685	0.98	0.977	0.000107296	1
ARPC2	C3	0.251495	1	1	0.000107974	1
NDUFB11	C3	0.251283	0.987	0.977	0.000117784	1
HSPG2	C3	0.31109	0.954	0.886	0.000128998	1
C4orf3	C3	0.266172	0.987	1	0.000131641	1
EEF1B2	C3	0.303195	1	1	0.000133273	1
PGAM1	C3	0.257582	1	1	0.000134923	1
PKDCC	C3	0.388033	0.96	0.909	0.000143318	1
HLA-A	C3	0.252886	0.947	0.773	0.000144362	1
TIMM8B	C3	0.256615	1	1	0.000148831	1
EID1	C3	0.274818	1	1	0.00016812	1
DNAJA1	C3	0.292828	1	1	0.000185218	1
PACS1	C3	0.292969	0.98	0.886	0.000188505	1
RPL18A	C3	0.273837	1	1	0.000194368	1
GAMT	C3	0.253443	0.974	0.909	0.000199001	1
FSCN1	C3	0.33071	1	1	0.000203941	1
CTSV	C3	0.507014	0.874	0.682	0.000204025	1
JTB	C3	0.253081	1	1	0.000227124	1
TMSB10	C3	0.499454	1	1	0.000246842	1
SSBP1	C3	0.27138	0.993	1	0.000249787	1
DNAJB11	C3	0.251512	0.967	0.841	0.000282298	1
SPEG	C3	0.25343	0.98	0.864	0.000312181	1
MYH7	C3	1.52848	0.854	0.636	0.000333561	1
MID1	C3	0.258134	0.881	0.75	0.000347173	1
LMOD1	C3	0.291855	0.768	0.5	0.000351824	1
DANCR	C3	0.298918	1	1	0.000363387	1
TERF1	C3	0.43073	0.934	0.841	0.000410696	1
H3F3A	C3	0.281115	1	1	0.000426949	1
DPYSL3	C3	0.471584	1	0.977	0.000478551	1
TNNT1	C3	0.373154	0.623	0.341	0.000484581	1
RPS26	C3	0.278622	1	1	0.000512245	1
GUCY1A1	C3	0.44259	0.894	0.818	0.000517693	1
CDC123	C3	0.268818	0.974	0.977	0.000541944	1
LY6E	C3	0.304858	0.887	0.795	0.000561592	1
ANXA1	C3	0.344323	0.444	0.159	0.000613286	1
RNF115	C3	0.255678	0.987	0.932	0.000641138	1
SELENOW	C3	0.323431	1	1	0.000685425	1
C7	C3	0.301512	0.417	0.159	0.000707529	1
SVIL	C3	0.314883	1	1	0.000732464	1
EMP2	C3	0.409087	1	0.977	0.000773936	1
PGRMC2	C3	0.303052	0.974	0.909	0.000817243	1
ACTN1	C3	0.311044	1	1	0.000854125	1
RBM38	C3	0.361465	0.993	0.886	0.000877582	1
BEX3	C3	0.293222	1	0.977	0.000973054	1
MMP15	C3	0.36836	0.993	1	0.000994307	1
CYBA	C3	0.281694	0.656	0.432	0.00104057	1
RBFOX2	C3	0.283563	0.974	0.955	0.00109519	1
S100A13	C3	0.295492	0.954	0.841	0.00126226	1
CADM1	C3	0.254397	0.921	0.75	0.00150713	1
NPPA	C3	0.769183	1	1	0.00153665	1
RPS19	C3	0.261677	1	1	0.00158548	1
TUBA1B	C3	0.34656	1	1	0.00172276	1
MYL12A	C3	0.406009	1	1	0.00172276	1
PKIG	C3	0.323198	0.98	0.955	0.00177685	1
ISYNA1	C3	0.254236	0.993	0.955	0.0017954	1
NUAK1	C3	0.28927	0.901	0.773	0.00188872	1
EMC10	C3	0.287743	0.993	1	0.00194928	1
MASP1	C3	0.517566	0.947	0.818	0.00196369	1
DAAM1	C3	0.277462	1	1	0.00213678	1
ASB2	C3	0.319072	0.921	0.727	0.00220422	1
SORBS2	C3	0.494466	0.993	1	0.00231716	1
LGR4	C3	0.276451	0.907	0.773	0.00234225	1
CAVIN1	C3	0.269338	1	0.977	0.00256225	1
SDF2L1	C3	0.28715	0.874	0.682	0.00270978	1
PDLIM7	C3	0.283993	1	1	0.00280286	1
TCEAL9	C3	0.252702	1	0.909	0.00283072	1
MYOCD	C3	0.385668	0.987	1	0.00283082	1
NAV2	C3	0.291181	0.828	0.818	0.00298651	1
HMGA1	C3	0.337119	0.987	0.977	0.00303382	1
CNN1	C3	0.356053	1	0.977	0.00312488	1
CAV1	C3	0.277741	0.384	0.182	0.00327675	1
C12orf75	C3	0.337214	0.96	0.977	0.00347956	1
UACA	C3	0.291066	0.854	0.682	0.0035479	1
TUBA1A	C3	0.398045	0.993	1	0.00394754	1
COL4A1	C3	0.311546	0.98	0.932	0.00396609	1
FHL1	C3	0.413459	0.828	0.682	0.00421908	1
MYH11	C3	0.402398	0.709	0.455	0.00425541	1
C1orf198	C3	0.258005	0.98	0.932	0.0045781	1
SKIL	C3	0.255953	0.947	0.841	0.00495253	1
NME4	C3	0.268189	0.993	0.977	0.00508056	1
ACTA2	C3	1.1242	0.629	0.432	0.00527296	1
TUBB	C3	0.306815	1	1	0.00534974	1
SMYD1	C3	0.300294	0.98	0.955	0.00655941	1
HMCES	C3	0.251817	0.98	0.886	0.0068339	1
TNNI1	C3	0.362113	1	1	0.00693007	1
CAMK2D	C3	0.255399	0.993	1	0.00731895	1
SERPINE2	C3	0.291189	0.768	0.614	0.00732471	1
MFGE8	C3	0.279426	1	0.977	0.0077973	1
TUBB6	C3	0.312496	1	1	0.00837815	1
GJA1	C3	0.262661	0.45	0.25	0.00979981	1
KRT8	C3	0.27959	1	1	0.0106348	1
CALR	C3	0.287985	0.993	1	0.0119028	1
RGS5	C3	0.300184	0.921	0.841	0.0119663	1
CRIP1	C3	0.387812	0.861	0.773	0.012462	1
COL1A1	C3	0.528317	0.821	0.705	0.0138789	1
CALB2	C3	0.30957	0.702	0.5	0.0147911	1
RPL12	C3	0.254716	1	1	0.0179684	1
SELENOM	C3	0.259369	0.861	0.727	0.0196766	1
TIMP3	C3	0.514039	0.98	0.977	0.0203828	1
HBEGF	C3	0.327099	0.563	0.432	0.0274494	1
LRRC49	C3	0.2871	0.901	0.864	0.0297545	1
CCN2	C3	0.555174	0.967	0.932	0.0320952	1
AL136171.2	C3	0.429649	0.868	0.773	0.0396532	1
TGM2	C3	0.409066	0.947	0.886	0.041782	1
SMPX	C3	0.254599	0.987	1	0.0483052	1
BEX1	C3	0.256499	0.954	0.955	0.0629692	1
APOE	C3	0.259781	1	0.977	0.0811652	1
SYNPO2L	C3	0.339499	0.987	0.977	0.097735	1
VCAN	C3	0.326782	1	0.977	0.110663	1
BANCR	C3	0.322695	0.43	0.318	0.11487	1
SFRP1	C3	0.273003	0.927	0.932	0.242432	1
SH3BGR	C3	0.280149	0.781	0.75	0.627351	1
LMNB2	C1	0.580417	0.937	0.455	3.85017e-14	7.45547e-10
NPPB	C1	3.00966	0.975	0.682	2.87262e-11	5.56254e-07
TAGLN	C1	1.60915	0.987	0.977	2.87562e-10	5.56835e-06
MRPL52	C1	0.446951	0.987	1	6.14717e-10	1.19034e-05
CRABP2	C1	1.39063	0.987	0.864	2.77418e-09	5.37193e-05
KRT18	C1	0.917668	1	1	5.79611e-09	0.000112236
ANXA2	C1	0.755988	1	1	7.45563e-09	0.000144371
LRATD2	C1	0.553956	1	0.864	8.17444e-09	0.00015829
TMSB4X	C1	1.37731	1	1	1.3463e-08	0.000260697
C1orf198	C1	0.626926	0.975	0.841	1.37965e-08	0.000267156
RAI14	C1	0.597929	0.975	0.818	2.31568e-08	0.000448408
KRT8	C1	0.638849	1	1	6.08614e-08	0.00117852
RAB31	C1	0.450044	0.962	0.75	9.10858e-08	0.00176379
ACTN1	C1	0.779278	1	0.977	1.58734e-07	0.00307372
GSTP1	C1	0.748496	1	1	2.57132e-07	0.0049791
S100A10	C1	1.30923	0.81	0.409	2.8632e-07	0.0055443
MLLT11	C1	0.62094	1	0.977	6.9599e-07	0.0134772
LEFTY2	C1	1.01041	0.658	0.25	7.86627e-07	0.0152322
CAPN2	C1	0.368937	0.975	0.841	1.42872e-06	0.0276657
MSN	C1	0.346165	0.962	0.864	1.71822e-06	0.0332716
AKR1B1	C1	0.507407	1	0.977	1.91707e-06	0.0371222
PDLIM3	C1	0.606748	0.899	0.568	1.97955e-06	0.0383321
NPPA	C1	1.34548	0.987	0.932	1.99296e-06	0.0385917
TBCB	C1	0.345492	0.962	0.909	2.41814e-06	0.0468249
CAVIN1	C1	0.473579	0.975	0.909	2.48354e-06	0.0480913
PPFIBP1	C1	0.363096	0.949	0.841	2.73514e-06	0.0529633
TERF1	C1	0.746003	0.975	0.955	2.82839e-06	0.0547689
EMC6	C1	0.31986	0.987	0.977	2.86598e-06	0.0554969
FHL1	C1	0.342975	0.759	0.386	3.31311e-06	0.0641552
HMCES	C1	0.453738	0.987	0.886	3.51387e-06	0.0680427
OAZ1	C1	0.35022	1	1	3.94546e-06	0.0763998
TPM4	C1	0.497523	1	1	4.15071e-06	0.0803743
IVNS1ABP	C1	0.485196	0.975	0.977	4.25676e-06	0.0824278
TNNC1	C1	0.667391	1	1	4.47828e-06	0.0867174
PEA15	C1	0.445425	1	0.909	4.9516e-06	0.0958827
AURKAIP1	C1	0.309301	1	1	5.07966e-06	0.0983624
RFTN1	C1	0.359495	0.861	0.5	5.56731e-06	0.107805
PDCD5	C1	0.332759	0.987	1	6.20563e-06	0.120166
PMEPA1	C1	0.301207	0.797	0.386	6.61503e-06	0.128093
PRELID1	C1	0.356549	1	1	8.14949e-06	0.157807
IFT43	C1	0.268759	0.924	0.75	8.53693e-06	0.165309
HEBP1	C1	0.311875	0.949	0.727	1.06897e-05	0.206995
SKIL	C1	0.264997	0.962	0.841	1.24222e-05	0.240543
COTL1	C1	0.384867	0.899	0.636	1.29268e-05	0.250315
PKIG	C1	0.341543	0.962	0.932	1.40714e-05	0.272479
MASP1	C1	0.652168	0.949	0.75	1.65621e-05	0.320709
AJUBA	C1	0.287848	0.924	0.75	1.72316e-05	0.333674
PACS1	C1	0.348424	0.962	0.955	1.76663e-05	0.342091
HOPX	C1	0.260172	0.481	0.091	1.82353e-05	0.353108
CCDC50	C1	0.272208	0.962	0.977	1.87523e-05	0.36312
SEC61G	C1	0.435063	0.975	1	1.89811e-05	0.367551
MYL6B	C1	0.324556	1	0.977	1.89817e-05	0.367562
FKBP4	C1	0.328303	0.987	0.977	1.92073e-05	0.371929
CALD1	C1	0.567592	0.987	0.955	1.98986e-05	0.385317
RND3	C1	0.297086	0.747	0.341	1.99183e-05	0.385699
JTB	C1	0.280107	0.987	1	2.03774e-05	0.394589
SRP19	C1	0.29672	0.975	0.977	2.1359e-05	0.413596
YWHAZ	C1	0.301653	1	1	2.13616e-05	0.413647
RRAS	C1	0.338954	0.886	0.636	2.27228e-05	0.440004
SH3BGRL3	C1	0.337771	0.975	0.841	2.33815e-05	0.452759
PSMD14	C1	0.268575	0.962	1	2.34639e-05	0.454354
PDLIM2	C1	0.35348	0.747	0.5	2.63726e-05	0.510679
DUSP14	C1	0.406289	0.924	0.818	2.72631e-05	0.527924
DYNLL1	C1	0.506231	1	1	2.963e-05	0.573755
RNF7	C1	0.354255	1	1	3.10346e-05	0.600954
TNFRSF12A	C1	0.41353	0.873	0.727	3.30698e-05	0.640364
ANXA3	C1	0.365319	1	1	3.32607e-05	0.64406
PITPNM1	C1	0.262364	0.835	0.568	3.44801e-05	0.667672
TXNDC17	C1	0.304489	0.975	0.977	4.08802e-05	0.791603
GADD45GIP1	C1	0.291326	1	1	4.58092e-05	0.88705
SDC2	C1	0.395634	0.937	0.841	4.80895e-05	0.931205
SLC7A5	C1	0.529968	0.949	0.864	5.22211e-05	1
GLRX	C1	0.541261	0.962	0.955	5.60905e-05	1
SARAF	C1	0.299901	1	1	5.73944e-05	1
SIPA1L2	C1	0.392589	0.975	1	7.49609e-05	1
H1FX	C1	0.441352	1	1	8.36914e-05	1
UBE2J1	C1	0.331341	0.924	0.841	8.66118e-05	1
EMP2	C1	0.567206	1	1	9.54337e-05	1
CEP170	C1	0.259305	0.949	0.864	0.000105941	1
MYL12A	C1	0.594138	1	1	0.000116	1
TUBB6	C1	0.456912	1	0.977	0.000116	1
SORBS2	C1	0.52784	0.975	1	0.000118524	1
SLC35B1	C1	0.292271	0.949	0.955	0.000123629	1
ANKRD1	C1	0.628939	0.962	0.909	0.000128979	1
SH3D19	C1	0.250458	0.937	0.795	0.000131871	1
SSB	C1	0.277645	1	1	0.00013196	1
SEC13	C1	0.26383	0.987	0.955	0.000137712	1
FSCN1	C1	0.392196	0.987	1	0.000140696	1
BAMBI	C1	0.548344	0.962	0.977	0.000145229	1
CCDC34	C1	0.404255	0.987	1	0.000153193	1
LOXL2	C1	0.258425	0.899	0.659	0.000158676	1
SERP1	C1	0.293508	0.962	0.977	0.000168457	1
PHLDB2	C1	0.266045	0.81	0.636	0.000171299	1
DPYSL3	C1	0.423527	1	1	0.000173912	1
COL1A1	C1	0.357022	0.962	0.841	0.000175054	1
ANXA1	C1	0.281452	0.405	0.068	0.000175953	1
MYL12B	C1	0.432548	0.975	1	0.000185229	1
DAD1	C1	0.330626	0.975	1	0.000193158	1
KIF5B	C1	0.323133	1	1	0.000197245	1
CDK2AP2	C1	0.478943	0.937	0.841	0.000197967	1
NME2	C1	0.302144	1	1	0.000201409	1
RABAC1	C1	0.33063	0.987	1	0.000218905	1
PCGF5	C1	0.295452	0.987	0.932	0.000221138	1
CYTOR	C1	0.283915	0.709	0.386	0.000236341	1
COA4	C1	0.267651	0.987	1	0.00023782	1
PGRMC2	C1	0.3272	0.962	0.955	0.000247729	1
RHEB	C1	0.447363	1	1	0.000247843	1
NECTIN2	C1	0.31612	0.962	0.955	0.000252886	1
RAB34	C1	0.27873	0.911	0.841	0.000252956	1
GYG1	C1	0.465761	1	0.977	0.000258261	1
TMEM167A	C1	0.264495	0.987	1	0.000258261	1
SORT1	C1	0.297051	0.962	0.909	0.000263285	1
EDF1	C1	0.300753	0.987	1	0.000269089	1
YBX3	C1	0.298846	1	1	0.000269089	1
CDC42EP3	C1	0.378317	0.975	0.932	0.000274536	1
GADD45G	C1	0.341283	0.608	0.295	0.000279787	1
EIF5A	C1	0.345522	1	0.977	0.000286131	1
RPL36AL	C1	0.340715	0.987	1	0.000292033	1
MYDGF	C1	0.327774	0.924	0.909	0.000309284	1
ACTR3	C1	0.25149	1	1	0.000323291	1
TNNT1	C1	0.331506	0.544	0.227	0.00032333	1
CXXC5	C1	0.323472	0.975	0.932	0.000329761	1
MAP4	C1	0.309902	1	1	0.000329907	1
AIF1L	C1	0.275704	0.899	0.818	0.000338382	1
ITGAV	C1	0.317227	0.937	0.977	0.000353802	1
RHOC	C1	0.300226	1	1	0.00035766	1
COL5A2	C1	0.765428	0.899	0.773	0.000364519	1
CALM1	C1	0.358752	1	1	0.000379883	1
SLC26A2	C1	0.340506	0.924	0.773	0.000389619	1
SSU72	C1	0.26402	1	1	0.000403408	1
NHP2	C1	0.260134	1	0.977	0.000403408	1
PKDCC	C1	0.389935	0.937	0.909	0.000410482	1
P4HB	C1	0.348518	0.987	1	0.000411536	1
APRT	C1	0.279706	0.962	0.909	0.000436362	1
ADAMTSL4	C1	0.346203	0.734	0.5	0.000479669	1
TGM2	C1	0.57308	0.937	0.841	0.000484238	1
ARPC2	C1	0.272779	1	1	0.00049199	1
CALB2	C1	0.477892	0.595	0.273	0.00049959	1
LGR4	C1	0.287942	0.937	0.955	0.000511157	1
SRM	C1	0.314215	0.975	0.932	0.000511541	1
ELOC	C1	0.256479	0.987	1	0.000511755	1
FLNB	C1	0.261552	0.658	0.364	0.000531964	1
PRKAR1A	C1	0.270344	1	1	0.000532258	1
SYNPO2L	C1	0.627587	0.975	0.977	0.000542749	1
TPM1	C1	0.342599	1	1	0.000542794	1
TMEM160	C1	0.279029	1	0.932	0.000553478	1
TIMP3	C1	0.521212	0.987	0.932	0.000581101	1
RAB5C	C1	0.260206	0.949	0.841	0.000619393	1
SMS	C1	0.355834	0.987	1	0.000634349	1
SEC61B	C1	0.288613	0.987	1	0.000659383	1
DDAH2	C1	0.282354	0.924	0.818	0.000692342	1
SH3BP5	C1	0.260786	0.873	0.773	0.000734808	1
CCND2	C1	0.376403	0.873	0.705	0.000738821	1
GNG12	C1	0.290204	0.899	0.864	0.000747675	1
CSRP2	C1	0.38177	1	1	0.00076899	1
XRCC4	C1	0.504245	0.823	0.705	0.000778263	1
TMEM141	C1	0.372942	1	1	0.000845828	1
KRT10	C1	0.259972	0.975	0.977	0.00086198	1
NOL7	C1	0.285917	1	0.955	0.000965436	1
RPL29	C1	0.256165	1	1	0.000965455	1
MGST1	C1	0.498907	0.975	1	0.000983749	1
GHRH	C1	0.258061	0.544	0.227	0.000994561	1
DDX21	C1	0.252484	0.975	0.932	0.00100202	1
MYOCD	C1	0.345848	0.987	1	0.00104065	1
GABARAPL2	C1	0.296272	0.987	0.977	0.0010504	1
GNG10	C1	0.25623	0.949	0.977	0.00105988	1
TMED9	C1	0.269496	0.975	1	0.00106024	1
CALU	C1	0.256331	0.975	1	0.00106024	1
SPARC	C1	0.308685	0.962	0.909	0.00112006	1
S100A11	C1	0.435551	0.747	0.5	0.00117759	1
RHOA	C1	0.29106	0.987	1	0.00118542	1
IGFBP7	C1	0.906875	0.848	0.682	0.00118753	1
ISOC2	C1	0.307054	1	0.955	0.00123006	1
UGP2	C1	0.290586	1	1	0.00123008	1
VMP1	C1	0.282826	0.937	0.932	0.00133428	1
SEPTIN11	C1	0.267016	0.987	0.955	0.00134852	1
NME1	C1	0.263525	0.975	1	0.00142467	1
POMP	C1	0.275841	1	1	0.0014247	1
SDF2L1	C1	0.419711	0.937	0.818	0.00144158	1
PDLIM1	C1	0.353593	0.987	0.977	0.00146418	1
RNF181	C1	0.283462	0.962	0.909	0.00150324	1
C12orf75	C1	0.29679	0.975	0.886	0.0015308	1
RPS26	C1	0.288998	1	1	0.00158888	1
CLSTN2	C1	0.346432	0.899	0.614	0.00163232	1
AHNAK	C1	0.359695	0.924	0.932	0.00173522	1
MYH7	C1	0.631855	0.924	0.841	0.00175929	1
MIF	C1	0.270499	1	1	0.00177031	1
ACTC1	C1	0.431855	1	1	0.00180234	1
ARF4	C1	0.287101	0.987	0.955	0.00215304	1
RGS5	C1	0.345071	1	0.977	0.00223051	1
STRAP	C1	0.260552	1	0.977	0.00223051	1
PDIA3	C1	0.286532	0.962	0.977	0.00241339	1
RPS10	C1	0.262855	1	1	0.00243497	1
SSR4	C1	0.298639	1	1	0.00247787	1
SURF4	C1	0.270901	0.962	0.932	0.00249817	1
OSTC	C1	0.269405	0.987	1	0.00252146	1
SPTAN1	C1	0.295246	1	1	0.00256575	1
NUTF2	C1	0.269284	1	1	0.00299754	1
CCDC80	C1	0.335744	0.671	0.409	0.00312502	1
PAWR	C1	0.281692	0.975	1	0.00337808	1
SMPX	C1	0.329201	0.987	0.977	0.00364545	1
NUAK1	C1	0.3414	0.924	0.818	0.0036514	1
KDM5B	C1	0.257119	0.962	0.932	0.00423662	1
XPOT	C1	0.271801	0.937	0.864	0.00440444	1
LRRC49	C1	0.283988	0.949	0.795	0.00446876	1
TMED2	C1	0.265482	0.987	0.977	0.00452939	1
EBNA1BP2	C1	0.306106	0.911	0.955	0.00471225	1
MAP1LC3B	C1	0.314754	1	1	0.00479863	1
RPS23	C1	0.255585	1	1	0.00538065	1
ADAM19	C1	0.258057	0.772	0.682	0.00541068	1
RPL12	C1	0.313362	1	1	0.00546881	1
NGFR	C1	0.394518	0.57	0.318	0.00581515	1
DNAJB11	C1	0.321711	0.949	0.932	0.00592497	1
DNAJC15	C1	0.361722	0.899	0.818	0.0061658	1
FTL	C1	0.306236	1	1	0.00642481	1
EIF4A1	C1	0.311866	1	1	0.00663315	1
RAB3IP	C1	0.344064	1	1	0.00706816	1
CALR	C1	0.483352	1	1	0.00718084	1
MDN1	C1	0.363447	0.911	0.932	0.00733713	1
LSM3	C1	0.280168	1	1	0.00741104	1
NRP2	C1	0.2571	0.734	0.523	0.00756736	1
ACTN4	C1	0.307845	1	0.955	0.00776868	1
SELENOK	C1	0.266548	1	1	0.00789141	1
HSPA5	C1	0.373201	0.975	1	0.00893651	1
WARS	C1	0.27729	0.975	0.841	0.00934568	1
LDHA	C1	0.294676	0.975	0.977	0.00965059	1
PSMB3	C1	0.281099	0.987	0.977	0.00987498	1
COL4A1	C1	0.312059	0.987	0.977	0.0113191	1
LINC01405	C1	0.604829	0.671	0.523	0.0120259	1
KDELR2	C1	0.259816	0.975	1	0.0155527	1
CTSV	C1	0.40794	0.975	0.909	0.0157741	1
CLIC1	C1	0.258698	0.987	0.977	0.0168381	1
JPT1	C1	0.351178	0.987	0.977	0.0178305	1
PDIA6	C1	0.255359	0.975	1	0.0218704	1
HSPB3	C1	0.290569	0.886	0.75	0.0220439	1
GYPC	C1	0.316567	0.987	0.932	0.0242547	1
CSRP1	C1	0.258342	0.57	0.341	0.0279809	1
GUCY1A1	C1	0.296568	0.962	0.977	0.0285422	1
HSP90B1	C1	0.369892	1	1	0.0373836	1
SH3BGR	C1	0.25514	0.772	0.545	0.037454	1
SLC3A2	C1	0.277857	0.962	0.932	0.0438304	1
GSTO1	C1	0.424954	0.949	0.977	0.0458043	1
CAMK2D	C1	0.256665	0.987	1	0.0531365	1
CALM2	C1	0.273241	1	1	0.065167	1
TUBB2B	C1	0.350181	0.975	0.977	0.0683008	1
UBE2S	C1	0.384398	1	1	0.0691056	1
CRIP1	C1	0.314723	0.949	0.886	0.0715063	1
ACTA2	C1	0.757847	0.734	0.591	0.0781379	1
FSTL1	C1	0.315599	0.975	1	0.0811832	1
PSAT1	C1	0.258109	0.937	0.841	0.0932148	1
HBD	C1	0.286269	1	1	0.0991715	1
CSRP3	C1	0.584905	0.975	0.977	0.106971	1
UCHL1	C1	0.334341	0.975	0.955	0.111639	1
ACAT2	C1	0.285751	0.962	1	0.11895	1
ACTA1	C1	0.447212	0.873	0.727	0.13495	1
RPL22L1	C1	0.251576	0.899	0.955	0.219787	1
PTTG1	C1	0.294234	0.911	0.909	0.273408	1
MFGE8	C1	0.330964	0.949	1	0.55631	1
LEFTY2	C5	1.44625	0.883	0.233	2.64012e-12	5.11232e-08
NPPB	C5	3.03045	0.983	0.442	4.27641e-12	8.28084e-08
LMNB2	C5	0.348391	0.8	0.116	1.50624e-11	2.91667e-07
RAI14	C5	0.951266	0.983	0.721	2.32258e-11	4.49743e-07
NPPA	C5	2.21391	1	0.977	3.4967e-11	6.771e-07
MYH7	C5	2.01636	1	0.837	5.75766e-10	1.11491e-05
SIPA1L2	C5	0.729081	1	0.977	8.83786e-10	1.71136e-05
CRABP2	C5	1.5882	1	0.93	1.1359e-09	2.19955e-05
SORT1	C5	0.607893	0.95	0.814	1.2073e-09	2.33781e-05
SYNPO2L	C5	1.01755	1	1	2.11576e-09	4.09696e-05
ANKRD1	C5	1.73297	1	0.953	1.28733e-08	0.000249278
TMSB4X	C5	1.24479	0.983	0.884	1.47144e-08	0.000284929
SPARC	C5	0.775345	0.967	0.791	1.65835e-08	0.000321122
TAGLN	C5	1.33529	1	0.884	6.16899e-08	0.00119456
SPCS2	C5	0.550879	1	0.884	7.43234e-08	0.0014392
VMP1	C5	0.621318	0.95	0.628	2.35442e-07	0.0045591
LGR4	C5	0.544419	1	0.837	2.38019e-07	0.004609
COTL1	C5	0.341119	0.767	0.326	2.42417e-07	0.00469416
KRT18	C5	0.845466	1	0.977	4.21246e-07	0.00815701
IER3	C5	0.549254	0.783	0.372	5.42366e-07	0.0105024
MASP1	C5	0.860594	0.95	0.907	6.82649e-07	0.0132188
PMEPA1	C5	0.393146	0.8	0.372	7.24691e-07	0.0140329
LRATD2	C5	0.568225	0.967	0.651	1.19787e-06	0.0231956
GPC6	C5	0.382914	0.883	0.512	1.66999e-06	0.0323377
SLC7A5	C5	0.536533	0.867	0.488	1.77608e-06	0.0343919
RAB31	C5	0.451463	0.883	0.605	2.08765e-06	0.0404252
PEA15	C5	0.648079	0.983	0.837	2.6568e-06	0.0514464
PACS1	C5	0.405572	0.983	0.907	3.40526e-06	0.0659395
DPYSL3	C5	0.589349	1	0.93	3.40863e-06	0.0660047
BCL7C	C5	0.3191	0.933	0.767	3.77316e-06	0.0730634
PKDCC	C5	0.503894	0.95	0.767	4.60156e-06	0.0891046
FLRT2	C5	0.271057	0.567	0.14	4.63838e-06	0.0898176
ADAM19	C5	0.350529	0.783	0.395	5.39258e-06	0.104422
TGM2	C5	0.814646	0.967	0.86	5.66507e-06	0.109698
CAVIN1	C5	0.394207	1	0.953	5.69292e-06	0.110238
CALR	C5	0.81243	1	1	5.69326e-06	0.110244
JOSD2	C5	0.333623	0.833	0.488	6.02438e-06	0.116656
DNAJB11	C5	0.483204	0.967	0.814	6.39874e-06	0.123905
PDIA3	C5	0.469441	1	0.884	7.79121e-06	0.150869
FILIP1	C5	0.43929	1	1	7.80016e-06	0.151042
SORBS2	C5	0.596562	0.983	1	8.04776e-06	0.155837
RGS5	C5	0.496529	1	0.953	8.83595e-06	0.171099
H1FX	C5	0.464355	1	0.93	9.11332e-06	0.17647
P4HB	C5	0.452242	1	1	9.11538e-06	0.17651
PKIG	C5	0.540452	0.983	0.884	1.14701e-05	0.222106
SYTL5	C5	0.273702	0.6	0.209	1.45865e-05	0.282454
ITM2B	C5	0.324423	1	0.953	1.48993e-05	0.288511
PAWR	C5	0.327969	0.967	0.907	1.53304e-05	0.296857
COL5A2	C5	0.924311	0.9	0.721	1.6965e-05	0.328511
CDH2	C5	0.39599	1	0.977	1.78646e-05	0.345929
FZD2	C5	0.338143	0.9	0.651	1.80174e-05	0.348889
CCN2	C5	0.789061	0.8	0.488	1.80664e-05	0.349838
SHC1	C5	0.335964	0.933	0.674	1.8574e-05	0.359666
ST6GAL1	C5	0.330682	0.933	0.698	1.87254e-05	0.362599
NGFR	C5	0.426764	0.467	0.07	1.92727e-05	0.373197
DERL3	C5	0.387695	0.783	0.419	1.9714e-05	0.381743
ITGB1	C5	0.404353	1	0.977	2.01444e-05	0.390076
TMED9	C5	0.405521	0.967	0.93	2.07345e-05	0.401504
AL136171.2	C5	0.799254	1	0.977	2.13857e-05	0.414113
SLC22A23	C5	0.277224	0.783	0.372	2.24768e-05	0.43524
SH3BGRL3	C5	0.37415	0.95	0.674	2.45119e-05	0.474648
EIF5B	C5	0.430712	1	0.977	2.48154e-05	0.480526
TPM4	C5	0.420208	1	0.977	2.55615e-05	0.494972
ARRDC3	C5	0.33039	0.767	0.419	2.6905e-05	0.520989
SERPINH1	C5	0.39826	1	0.93	2.96169e-05	0.573501
RBPMS	C5	0.325504	1	1	3.23465e-05	0.626359
ENTPD4	C5	0.287119	0.933	0.767	3.25586e-05	0.630464
HMCES	C5	0.481074	0.967	0.837	3.31077e-05	0.641098
TMED10	C5	0.34394	1	0.93	3.4286e-05	0.663914
RABAC1	C5	0.417955	0.967	0.93	3.73851e-05	0.723925
CCDC34	C5	0.432402	0.883	0.674	3.78473e-05	0.732875
GYG1	C5	0.549725	1	0.977	3.96565e-05	0.767909
RFTN1	C5	0.302934	0.717	0.395	4.63852e-05	0.898202
IGFBP7	C5	0.674882	0.75	0.442	5.34438e-05	1
HYOU1	C5	0.479361	0.933	0.767	6.13697e-05	1
LGMN	C5	0.325603	0.883	0.744	6.25165e-05	1
S100A10	C5	0.569052	0.517	0.163	7.71051e-05	1
CD151	C5	0.34185	1	0.93	8.06947e-05	1
SLC26A2	C5	0.362083	0.9	0.698	8.33505e-05	1
ARPC3	C5	0.359154	0.983	0.953	8.77206e-05	1
MRAS	C5	0.318713	0.9	0.837	8.87501e-05	1
KIFAP3	C5	0.39889	0.983	0.907	9.26555e-05	1
PDIA6	C5	0.512237	1	0.953	9.53343e-05	1
PKP2	C5	0.387935	1	1	9.53385e-05	1
KDELR2	C5	0.363684	0.983	0.977	0.000104989	1
POPDC2	C5	0.391487	1	1	0.000109408	1
HSP90B1	C5	0.789336	1	0.977	0.000128876	1
DAG1	C5	0.363547	1	0.977	0.000139793	1
CANX	C5	0.409703	1	0.977	0.000139793	1
MYDGF	C5	0.398775	0.967	0.698	0.000148055	1
MICAL3	C5	0.333199	0.95	0.86	0.00015493	1
TPM1	C5	0.286211	1	1	0.000159946	1
REXO2	C5	0.305978	0.967	0.884	0.000172919	1
TNFRSF12A	C5	0.519029	0.833	0.651	0.000198036	1
SDF2L1	C5	0.596592	0.9	0.721	0.000211628	1
SEL1L	C5	0.308707	0.933	0.698	0.000218635	1
SSR4	C5	0.46776	0.983	1	0.000225883	1
SELENOH	C5	0.327779	1	1	0.000238051	1
GSTP1	C5	0.50345	1	1	0.000238051	1
BAMBI	C5	0.526508	1	0.977	0.000250832	1
DENND5B	C5	0.389414	1	0.977	0.000264255	1
DPP7	C5	0.252695	0.933	0.581	0.000266621	1
MYL2	C5	0.477596	0.5	0.186	0.00029359	1
KRT8	C5	0.514928	1	1	0.000300816	1
EMC10	C5	0.414901	1	0.977	0.000308675	1
SH3D19	C5	0.282642	0.867	0.674	0.000319811	1
IGFBP6	C5	0.268384	0.8	0.535	0.000341336	1
PRKAR1A	C5	0.302372	1	1	0.00036931	1
CD63	C5	0.381881	1	1	0.00037883	1
PHLDB2	C5	0.269895	0.583	0.279	0.000410855	1
MLEC	C5	0.27755	1	1	0.000419252	1
CDK2AP2	C5	0.399275	0.867	0.791	0.000438957	1
C5orf24	C5	0.280493	0.967	0.977	0.000452109	1
MAP1LC3B	C5	0.351605	0.983	1	0.000475447	1
ARHGAP10	C5	0.354846	0.867	0.558	0.00047881	1
MANF	C5	0.516504	0.983	0.977	0.00048142	1
THBS1	C5	0.347419	0.6	0.302	0.000487163	1
SVIL	C5	0.340466	1	1	0.000487497	1
TTC3	C5	0.338089	0.983	1	0.000487497	1
MGST1	C5	0.520879	0.933	0.791	0.000505856	1
XRCC4	C5	0.463582	0.733	0.512	0.000510165	1
AIF1L	C5	0.263479	0.85	0.651	0.00051515	1
ACTN1	C5	0.406456	0.967	0.884	0.000524339	1
LOXL2	C5	0.28717	0.85	0.628	0.000529148	1
RPS19BP1	C5	0.297641	0.983	0.953	0.000580085	1
UBE2J1	C5	0.331963	0.867	0.698	0.000592084	1
EXOG	C5	0.286607	0.85	0.512	0.000596498	1
VASH1	C5	0.301716	0.8	0.535	0.00061355	1
PDLIM3	C5	0.612702	0.583	0.302	0.00063247	1
SLMAP	C5	0.274193	0.933	0.86	0.000668609	1
RBM8A	C5	0.253281	1	0.953	0.000689003	1
AC104083.1	C5	0.273461	0.95	0.744	0.00072113	1
CAMK2D	C5	0.376498	1	1	0.000741258	1
SRSF10	C5	0.296203	0.983	0.884	0.000767831	1
DDOST	C5	0.274995	0.917	0.814	0.000787531	1
SLC38A2	C5	0.315509	1	0.86	0.000815682	1
DYNLT1	C5	0.307745	1	0.977	0.000856925	1
LINC01405	C5	0.77877	0.85	0.628	0.000908714	1
GUCY1A1	C5	0.363894	1	0.953	0.000920809	1
SMPX	C5	0.34948	1	1	0.000920839	1
RRAS	C5	0.316809	0.75	0.465	0.000964864	1
MYOCD	C5	0.398439	1	0.953	0.0010129	1
DNAJC10	C5	0.312209	0.933	0.907	0.00103448	1
TMEM141	C5	0.322243	1	0.93	0.00111336	1
HSPB3	C5	0.390533	0.983	0.884	0.00112546	1
CRELD2	C5	0.291897	0.85	0.628	0.00112699	1
SLIT3	C5	0.319153	0.917	0.744	0.00115603	1
MAGI2-AS3	C5	0.280583	0.983	0.86	0.00119281	1
CXCL12	C5	0.544359	0.75	0.512	0.00122535	1
HSPA5	C5	0.638605	0.983	1	0.00125217	1
RASAL2	C5	0.301769	0.95	0.791	0.0012854	1
LRRC49	C5	0.323189	0.95	1	0.0013427	1
SLC16A1	C5	0.325811	1	0.907	0.001374	1
TMEM59	C5	0.260393	0.983	0.953	0.00140648	1
MTCH1	C5	0.307474	1	1	0.00140665	1
DANCR	C5	0.344554	1	1	0.00150758	1
CCN1	C5	0.35028	0.667	0.395	0.00155865	1
NEK7	C5	0.254509	0.933	0.837	0.00160462	1
VKORC1	C5	0.251846	0.883	0.767	0.00161301	1
ITGAV	C5	0.34184	0.967	0.884	0.00172689	1
SARAF	C5	0.256199	1	1	0.00172973	1
PRSS35	C5	0.355952	0.817	0.814	0.00175085	1
PDLIM1	C5	0.391372	0.967	0.953	0.00176904	1
TNNC1	C5	0.378034	1	1	0.00176956	1
TMED2	C5	0.272448	0.967	0.907	0.00180838	1
PRRC2B	C5	0.259501	1	0.953	0.00181017	1
CNN1	C5	0.416721	0.95	0.86	0.0018876	1
SEC61G	C5	0.304839	1	1	0.00189415	1
PDIA4	C5	0.481142	0.967	0.837	0.00193077	1
SET	C5	0.272778	1	1	0.00198164	1
AJUBA	C5	0.25703	0.817	0.628	0.00201895	1
ASS1	C5	0.261076	0.7	0.419	0.00202209	1
PLEKHA1	C5	0.299404	0.883	0.837	0.00206929	1
RERE	C5	0.251245	0.95	0.93	0.00209413	1
CNN3	C5	0.254245	0.967	0.953	0.00211924	1
SKIL	C5	0.288531	0.983	0.837	0.00218703	1
APLP2	C5	0.328274	1	0.977	0.00231786	1
TUBB6	C5	0.365442	0.917	0.953	0.00236627	1
CLPTM1L	C5	0.307446	0.95	0.907	0.00252881	1
EIF1	C5	0.398044	1	1	0.00258917	1
DNAJC15	C5	0.406022	0.967	0.814	0.00263496	1
CALD1	C5	0.42071	0.967	0.907	0.00282414	1
FSCN1	C5	0.319911	1	0.953	0.00288916	1
EMP2	C5	0.355331	1	1	0.00295293	1
C1orf198	C5	0.315141	0.917	0.814	0.0029889	1
XBP1	C5	0.258844	0.983	0.86	0.00328625	1
NOL7	C5	0.257654	1	0.953	0.00329096	1
SH3BGR	C5	0.539308	0.767	0.535	0.00336629	1
IGFBP3	C5	0.264189	0.533	0.233	0.00342995	1
UGP2	C5	0.328911	1	1	0.00366408	1
OSTC	C5	0.363901	1	0.953	0.00374306	1
MFGE8	C5	0.291371	0.933	0.884	0.00381218	1
PALLD	C5	0.337462	0.983	1	0.00398975	1
SDC2	C5	0.296887	0.85	0.767	0.00422053	1
FRAS1	C5	0.262299	0.95	0.791	0.0043566	1
SEPTIN7	C5	0.261587	1	0.977	0.00443371	1
CDC42EP3	C5	0.321218	0.983	0.953	0.00452726	1
CD24	C5	0.323519	0.85	0.814	0.00453226	1
FN1	C5	0.280159	0.8	0.674	0.00468085	1
TIMP1	C5	0.319344	0.883	0.767	0.0048261	1
JUN	C5	0.31391	0.7	0.558	0.00483308	1
COL4A2	C5	0.284424	0.983	0.953	0.0052373	1
CALB2	C5	0.404517	0.5	0.256	0.00557564	1
MYL12A	C5	0.280179	0.983	1	0.00580503	1
ISOC2	C5	0.301509	0.983	0.977	0.00586456	1
JPT1	C5	0.297053	0.967	1	0.00592478	1
SBF2-AS1	C5	0.25014	0.55	0.326	0.00633239	1
GPRIN3	C5	0.304639	0.933	0.744	0.00634578	1
PRICKLE1	C5	0.29915	1	1	0.00682847	1
PPIB	C5	0.372293	1	1	0.0069672	1
AKR1B1	C5	0.525032	0.983	0.953	0.00754709	1
TERF1	C5	0.278672	0.867	0.744	0.0076613	1
ATP13A3	C5	0.345941	0.95	0.907	0.00769013	1
BANCR	C5	0.798413	0.617	0.488	0.0077042	1
PSMA7	C5	0.271444	1	0.977	0.00850006	1
HERPUD1	C5	0.443232	0.95	0.86	0.00881825	1
CCT2	C5	0.291571	1	1	0.00937424	1
CRYAB	C5	0.404515	1	0.977	0.00993645	1
RAPGEF2	C5	0.254563	0.9	0.837	0.0106543	1
SLC3A2	C5	0.250362	0.883	0.721	0.0106923	1
PTTG1IP	C5	0.26657	0.983	0.953	0.0113657	1
SH3PXD2A	C5	0.25462	1	0.907	0.0115829	1
UCHL1	C5	0.507237	0.95	0.814	0.0117566	1
RPN2	C5	0.259063	0.983	0.977	0.0119198	1
RCN1	C5	0.263161	0.95	0.86	0.0120054	1
ISYNA1	C5	0.289527	0.933	0.93	0.0120204	1
H2AFY	C5	0.254608	1	1	0.0122635	1
HES4	C5	0.284643	0.817	0.674	0.0125744	1
COL1A1	C5	0.288663	0.9	0.721	0.0127368	1
COL4A1	C5	0.285461	0.983	0.953	0.0132215	1
FTL	C5	0.54851	1	1	0.0132225	1
DGKI	C5	0.447021	0.933	0.953	0.0142378	1
EIF1B	C5	0.300647	1	1	0.0153413	1
RAB3IP	C5	0.406582	1	0.977	0.0162098	1
TJP1	C5	0.255439	1	0.977	0.0162098	1
LMOD2	C5	0.447368	0.883	0.837	0.0171381	1
HIP1	C5	0.253795	0.883	0.721	0.0173985	1
MPDZ	C5	0.257465	0.967	0.884	0.0183882	1
GOLGB1	C5	0.296436	1	0.953	0.0184058	1
WARS	C5	0.287645	0.95	0.86	0.0193845	1
PRKAG2	C5	0.251132	0.983	0.953	0.0194231	1
PRDX4	C5	0.258972	0.867	0.791	0.0194999	1
DUSP14	C5	0.274463	0.85	0.744	0.0195018	1
CADM1	C5	0.267688	0.983	0.814	0.0204502	1
PCDH7	C5	0.296492	1	0.907	0.0208552	1
HAND1	C5	0.261003	0.717	0.512	0.0215198	1
CXXC5	C5	0.258032	0.95	0.86	0.0219504	1
NAV2-AS2	C5	0.25696	0.6	0.442	0.022914	1
COL2A1	C5	0.297354	1	0.977	0.0235913	1
BMP10	C5	0.344824	0.45	0.256	0.0247563	1
GLRX	C5	0.263996	0.883	0.767	0.0262906	1
UBC	C5	0.312912	1	1	0.0294968	1
TIMP3	C5	0.363285	1	0.953	0.0331736	1
FTH1	C5	0.296579	1	1	0.0337302	1
PGRMC2	C5	0.268418	0.95	0.907	0.037821	1
TUBA1A	C5	0.36846	1	1	0.0410492	1
HMGA1	C5	0.30709	1	1	0.0430762	1
AEBP1	C5	0.274887	0.933	0.93	0.0473507	1
IVNS1ABP	C5	0.311848	0.95	0.977	0.0477535	1
SFRP1	C5	0.252485	0.933	0.93	0.0504185	1
FLNC	C5	0.292385	1	0.977	0.0562256	1
LINC00881	C5	0.309782	0.833	0.884	0.0575869	1
TUBA1B	C5	0.335552	0.983	1	0.0616009	1
PSAT1	C5	0.280224	0.7	0.488	0.0642305	1
BEX1	C5	0.262627	0.933	0.86	0.0672706	1
SESN2	C5	0.290058	0.583	0.442	0.077347	1
ACTC1	C5	0.294125	1	1	0.0838592	1
TUBB	C5	0.293852	1	1	0.0850636	1
NUCB2	C5	0.257007	0.817	0.814	0.0852981	1
NEAT1	C5	0.347449	0.717	0.605	0.100703	1
TEAD1	C5	0.275788	1	0.953	0.107759	1
CSRP3	C5	0.584517	1	1	0.115278	1
GAS5	C5	0.320178	1	1	0.124837	1
GYPC	C5	0.273384	0.917	0.93	0.130604	1
TUBB2B	C5	0.2837	0.833	0.744	0.189193	1
RRAD	C5	0.312909	0.467	0.395	0.213769	1
GADD45G	C5	0.251505	0.3	0.233	0.214303	1
C12orf75	C5	0.319077	0.85	0.837	0.233024	1
H19	C5	0.379255	0.5	0.558	0.845642	1

## Sheet: Up in KO
gene	cluster	avg_log2FC	pct.1	pct.2	p_val	p_val_adj
MTRNR2L8	C4	0.821379	1	1	7.61103e-12	1.4738e-07
FNIP2	C4	0.577499	0.966	0.857	9.10685e-11	1.76345e-06
MT-ND3	C4	0.517862	1	1	4.48967e-10	8.69379e-06
SLC7A11	C4	0.546047	0.819	0.446	2.75588e-09	5.33649e-05
COL6A1	C4	0.444165	0.979	0.893	2.80481e-09	5.43123e-05
MT-CO3	C4	0.32274	1	1	3.18991e-09	6.17694e-05
VEGFA	C4	0.557674	0.958	0.839	6.63133e-09	0.000128409
DDIT4	C4	0.610424	0.84	0.482	1.67813e-08	0.000324954
NUDT8	C4	0.34683	0.861	0.536	2.64895e-08	0.000512942
SESN2	C4	0.567409	0.845	0.536	4.68738e-08	0.000907663
RPS28	C4	0.298553	1	1	1.02471e-07	0.00198424
CEBPG	C4	0.404648	0.891	0.679	1.73003e-07	0.00335002
NFE2L1	C4	0.372954	0.983	0.982	1.93736e-07	0.0037515
SDC3	C4	0.356135	0.903	0.696	2.78479e-07	0.00539247
CEBPB	C4	0.479296	0.891	0.643	2.90571e-07	0.00562661
SHMT2	C4	0.548781	0.95	0.946	7.04534e-07	0.0136426
EIF4EBP1	C4	0.508673	0.987	1	7.96599e-07	0.0154253
ASAP1	C4	0.297964	0.975	0.804	8.68986e-07	0.016827
IARS	C4	0.463463	0.996	0.964	9.02712e-07	0.0174801
EEF1A2	C4	0.388731	0.895	0.732	1.45477e-06	0.0281701
CLIC4	C4	0.306416	1	1	1.57343e-06	0.0304679
SLC1A4	C4	0.30806	0.853	0.607	1.84072e-06	0.0356437
ATP1A3	C4	0.279498	0.63	0.304	2.10011e-06	0.0406665
HSPA9	C4	0.474494	0.992	1	2.31324e-06	0.0447937
DDIT3	C4	0.500892	0.845	0.661	3.06065e-06	0.0592664
MTRNR2L12	C4	0.366212	1	1	3.83765e-06	0.0743123
GARS	C4	0.477411	0.983	0.964	4.61496e-06	0.0893641
BEX2	C4	0.446739	0.916	0.911	4.90107e-06	0.0949043
WARS	C4	0.51311	0.954	0.929	5.58101e-06	0.108071
PKIB	C4	0.398577	0.882	0.643	5.6986e-06	0.110348
GPT2	C4	0.309297	0.908	0.839	6.72919e-06	0.130304
CHAC1	C4	0.385797	0.769	0.5	7.58016e-06	0.146782
SLC25A6	C4	0.295193	1	1	8.84917e-06	0.171355
IDH1	C4	0.418172	0.979	0.946	9.91019e-06	0.191901
RNF187	C4	0.376254	0.954	0.982	1.23575e-05	0.23929
MTDH	C4	0.25876	0.996	0.964	1.24153e-05	0.240409
MTHFD2	C4	0.469226	0.912	0.893	1.33446e-05	0.258404
TRIB3	C4	0.389448	0.765	0.5	1.44324e-05	0.27947
GADD45A	C4	0.290177	0.933	0.893	1.68555e-05	0.32639
VEGFB	C4	0.28166	0.996	0.982	1.75349e-05	0.339547
EPB41	C4	0.286973	0.828	0.679	1.92076e-05	0.371936
INHBE	C4	0.261664	0.559	0.25	2.13958e-05	0.414308
NUPR1	C4	0.318155	0.437	0.125	2.24903e-05	0.435502
PABPC1	C4	0.322386	1	1	2.68149e-05	0.519243
NMRK2	C4	0.284908	0.513	0.214	2.69959e-05	0.522749
MT-ND4L	C4	0.285276	1	1	4.26955e-05	0.826755
MT-ND1	C4	0.301652	1	1	4.33436e-05	0.839306
PSAT1	C4	0.403795	0.891	0.875	6.03686e-05	1
MT-ATP6	C4	0.252274	1	1	7.39803e-05	1
MT-CYB	C4	0.252376	1	1	7.45238e-05	1
SARS	C4	0.319415	0.992	1	7.50709e-05	1
GOT1	C4	0.284785	0.992	1	8.68472e-05	1
CBX4	C4	0.313414	0.798	0.714	9.64269e-05	1
ARHGEF2	C4	0.250874	0.815	0.607	0.000101356	1
HERPUD1	C4	0.335121	0.975	0.893	0.000110114	1
ATF4	C4	0.411588	0.979	0.946	0.000116224	1
GHITM	C4	0.262225	1	1	0.000128881	1
PDGFD	C4	0.255535	0.731	0.536	0.000143884	1
MT-ND2	C4	0.325029	1	1	0.000229976	1
NIBAN1	C4	0.424254	0.782	0.589	0.000245435	1
TARS	C4	0.269246	0.996	0.982	0.000253939	1
BRI3	C4	0.258354	0.996	1	0.000314296	1
LSS	C4	0.355242	0.95	0.946	0.000350719	1
HAND2	C4	0.364221	0.966	0.929	0.000361566	1
EEF2	C4	0.261062	1	1	0.000390466	1
PCK2	C4	0.302784	0.824	0.661	0.000483819	1
IGFBP5	C4	0.326297	0.681	0.464	0.00053679	1
ACTG1	C4	0.485907	1	1	0.000630741	1
ATF5	C4	0.459473	0.849	0.679	0.000698618	1
TCEA1	C4	0.264435	0.987	0.982	0.000700925	1
SCD	C4	0.453618	1	1	0.00073053	1
DHCR7	C4	0.345389	0.971	0.946	0.000795551	1
HAND2-AS1	C4	0.367375	0.941	0.946	0.000881755	1
ACSL3	C4	0.266762	0.979	0.946	0.00122172	1
LONP1	C4	0.270774	0.945	0.929	0.00126224	1
ZFP36L1	C4	0.350997	0.962	0.929	0.00157032	1
LINC00662	C4	0.273997	0.937	0.857	0.00218307	1
LAMB1	C4	0.266041	0.744	0.589	0.00220051	1
SLC3A2	C4	0.265917	0.937	0.982	0.00232452	1
G0S2	C4	0.282175	0.429	0.232	0.00247255	1
MYH7B	C4	0.29091	0.996	0.929	0.00295331	1
TMBIM6	C4	0.255151	0.996	1	0.00330754	1
LAMA2	C4	0.258852	0.966	0.875	0.0036363	1
IGFBP2	C4	0.393877	0.912	0.768	0.00396025	1
MALAT1	C4	0.301403	1	1	0.00451452	1
CKM	C4	0.393841	0.853	0.714	0.00486733	1
FTL	C4	0.354824	0.996	1	0.00785858	1
SC5D	C4	0.271262	0.966	0.982	0.008801	1
INSIG1	C4	0.365096	0.92	0.768	0.0097731	1
MAP1LC3B	C4	0.252657	1	1	0.0155742	1
UCP2	C4	0.2635	0.899	0.786	0.0206512	1
CEBPD	C4	0.302181	0.748	0.661	0.0285047	1
TMEM97	C4	0.364158	0.929	0.875	0.0285528	1
FTH1	C4	0.260077	1	1	0.0352018	1
FDFT1	C4	0.275702	0.996	0.982	0.0357364	1
FITM1	C4	0.267637	0.958	0.964	0.0402604	1
HMGCS1	C4	0.279816	0.992	0.964	0.0664696	1
ID3	C2	0.633196	0.8	0.379	1.15855e-16	2.24343e-12
ID2	C2	0.792897	0.955	0.724	2.89599e-16	5.60779e-12
HAND2-AS1	C2	0.76031	0.95	0.782	1.14386e-13	2.21497e-09
ACO2	C2	0.410053	0.99	0.977	4.6331e-12	8.97153e-08
ATP5ME	C2	0.417581	1	1	1.1873e-11	2.29909e-07
HAND2	C2	0.652515	0.915	0.747	1.88911e-11	3.65806e-07
ATP5F1B	C2	0.412597	1	1	1.51192e-10	2.92767e-06
COX7C	C2	0.375394	1	1	4.54826e-10	8.80726e-06
VEGFB	C2	0.356422	0.97	0.92	6.04102e-10	1.16978e-05
RNF187	C2	0.370443	0.995	1	8.43821e-10	1.63397e-05
COX5A	C2	0.417167	1	1	9.30001e-10	1.80085e-05
FNIP2	C2	0.488117	0.955	0.943	9.60017e-10	1.85898e-05
MT-ND3	C2	0.426074	0.95	0.977	1.38033e-09	2.67287e-05
MAP2K2	C2	0.355816	1	0.989	1.39557e-09	2.70239e-05
NDUFS7	C2	0.340814	1	0.989	1.72333e-09	3.33706e-05
ID1	C2	0.434249	0.535	0.161	1.93279e-09	3.74265e-05
UBE2M	C2	0.318987	0.995	1	1.95108e-09	3.77808e-05
FITM1	C2	0.658794	0.93	0.793	3.056e-09	5.91764e-05
TMOD1	C2	0.373006	0.94	0.92	3.69153e-09	7.14828e-05
LINC01578	C2	0.298801	0.985	0.943	9.40402e-09	0.000182099
DCXR	C2	0.299564	0.985	0.954	2.32894e-08	0.000450975
ZFAND5	C2	0.312279	0.99	1	2.59173e-08	0.000501862
NDUFB1	C2	0.407777	1	0.989	4.51303e-08	0.000873904
COX8A	C2	0.290677	1	1	2.09214e-07	0.00405123
EEF1A2	C2	0.331054	0.86	0.736	2.36189e-07	0.00457356
ATP5F1A	C2	0.273443	1	1	2.91193e-07	0.00563865
FXYD6	C2	0.319701	0.905	0.713	3.20133e-07	0.00619905
SDHA	C2	0.296772	0.975	0.966	3.25201e-07	0.0062972
NDUFB9	C2	0.310888	0.995	0.989	3.58818e-07	0.00694815
COX5B	C2	0.317148	1	1	4.00523e-07	0.00775573
NDUFA6	C2	0.317048	1	0.989	4.00523e-07	0.00775573
PDHA1	C2	0.376738	0.995	0.954	4.13725e-07	0.00801136
MYH7B	C2	0.358373	0.79	0.552	4.20683e-07	0.00814611
NDRG2	C2	0.265326	0.84	0.655	4.61734e-07	0.00894101
IGFBP2	C2	0.388206	0.8	0.644	6.57843e-07	0.0127385
HRC	C2	0.356353	0.82	0.667	8.08058e-07	0.0156472
FABP3	C2	0.399088	0.995	1	8.99612e-07	0.0174201
MLF1	C2	0.329084	0.95	0.897	9.32429e-07	0.0180556
RBPMS2	C2	0.2599	0.985	1	9.432e-07	0.0182641
MXRA7	C2	0.258039	0.98	0.966	1.04458e-06	0.0202273
COX7B	C2	0.381379	1	0.989	1.06965e-06	0.0207128
GPI	C2	0.307129	0.975	0.977	1.12096e-06	0.0217062
PPP1R12B	C2	0.520788	0.985	0.977	1.32077e-06	0.0255755
TNNI1	C2	0.500246	0.995	1	1.38393e-06	0.0267984
ATP5PO	C2	0.300336	1	0.989	1.47255e-06	0.0285144
TPI1	C2	0.327492	1	0.989	1.55454e-06	0.0301021
ATP5MC3	C2	0.401615	0.995	1	1.7319e-06	0.0335365
PPP1R1A	C2	0.50093	0.9	0.793	1.98004e-06	0.0383416
PRDX2	C2	0.348794	1	1	2.00394e-06	0.0388042
PARM1	C2	0.298196	0.775	0.644	2.19583e-06	0.04252
LMO4	C2	0.316983	0.995	0.989	2.39745e-06	0.0464243
UQCR11	C2	0.286955	1	1	2.53797e-06	0.0491452
MTRNR2L8	C2	0.566952	0.895	0.966	3.52568e-06	0.0682712
CITED4	C2	0.307118	0.85	0.805	3.6002e-06	0.0697142
CREM	C2	0.301719	0.95	0.943	3.63716e-06	0.0704301
AASS	C2	0.266596	0.88	0.805	4.74971e-06	0.0919733
ANKRD9	C2	0.250407	0.935	0.897	5.33071e-06	0.103224
ATP5F1D	C2	0.292949	1	1	6.72099e-06	0.130145
GAPDH	C2	0.303823	1	1	7.33362e-06	0.142008
HSPB7	C2	0.436605	0.995	1	7.71527e-06	0.149399
LBH	C2	0.357359	0.87	0.736	1.29145e-05	0.250076
EIF3K	C2	0.287766	0.995	1	1.3764e-05	0.266527
UQCRH	C2	0.281498	1	1	1.47682e-05	0.285972
GOT1	C2	0.312511	0.995	1	1.51891e-05	0.294122
MDH1	C2	0.362955	0.995	1	1.52961e-05	0.296194
UQCRB	C2	0.267273	1	0.989	1.52961e-05	0.296194
NDUFA1	C2	0.254978	1	0.989	1.56215e-05	0.302494
MYBPC3	C2	0.404605	0.97	0.989	1.67519e-05	0.324384
TNNT2	C2	0.421293	1	1	2.53775e-05	0.491411
SUCLG1	C2	0.26959	0.99	0.977	2.5727e-05	0.498177
ATP5PD	C2	0.300944	1	0.977	3.71124e-05	0.718645
UQCRC1	C2	0.264667	0.995	0.977	3.94235e-05	0.763396
NDUFB5	C2	0.255366	0.995	0.989	4.00896e-05	0.776296
IDH3A	C2	0.257352	0.96	0.897	5.06848e-05	0.98146
ATP5MD	C2	0.266195	1	0.989	5.56909e-05	1
ACSL3	C2	0.252396	0.92	0.966	6.63082e-05	1
BMP2K	C2	0.255444	0.82	0.77	7.02267e-05	1
HIGD2A	C2	0.252472	0.995	0.989	7.64351e-05	1
LSS	C2	0.340298	0.92	0.805	0.000176816	1
SLC25A5	C2	0.256449	1	1	0.000192541	1
COX6B1	C2	0.263483	1	1	0.000200985	1
NDUFA4	C2	0.253031	1	1	0.000245692	1
TECRL	C2	0.453483	0.97	0.966	0.000290716	1
NREP	C2	0.280137	0.995	0.989	0.000392265	1
PKM	C2	0.279754	0.995	0.989	0.000401579	1
CRIP2	C2	0.263185	1	1	0.000427021	1
MYL4	C2	0.339158	0.99	1	0.000502413	1
MDK	C2	0.291601	1	1	0.000529169	1
LAMA2	C2	0.274106	0.85	0.897	0.000716658	1
RYR2	C2	0.255651	0.89	0.897	0.000794549	1
FTH1	C2	0.278497	1	1	0.00126354	1
MT-ND6	C2	0.35418	0.87	0.92	0.00126639	1
PKIB	C2	0.30521	0.875	0.793	0.00182106	1
MYH6	C2	0.466783	0.98	0.977	0.00300457	1
UBC	C2	0.254624	1	1	0.00578196	1
MYL3	C2	0.431378	0.92	0.943	0.0124592	1
HMGCS1	C2	0.404093	0.98	0.977	0.0145787	1
CKM	C2	0.353785	0.62	0.575	0.0369397	1
PLN	C2	0.336555	0.955	0.943	0.0536322	1
NEAT1	C2	0.502618	0.76	0.782	0.183769	1
PRDX1	C2	0.271841	1	1	0.843592	1
UBE2M	C0	0.506197	1	0.995	1.60511e-12	3.10813e-08
MAP2K2	C0	0.434971	0.982	0.965	1.30669e-08	0.000253027
ABLIM3	C0	0.259274	0.636	0.305	6.4348e-08	0.00124604
MT-ND3	C0	0.625024	0.982	0.995	7.89993e-07	0.0152974
NAPA	C0	0.315208	0.945	0.885	8.13185e-07	0.0157465
RNF187	C0	0.434258	0.982	0.96	1.29922e-06	0.0251581
ALYREF	C0	0.313466	0.945	0.815	1.55014e-06	0.0300169
MTRNR2L8	C0	0.624882	0.927	0.835	1.87416e-06	0.0362912
CDKN1C	C0	0.369865	0.909	0.87	3.78161e-06	0.0732271
MXRA7	C0	0.430713	0.945	0.94	3.84935e-06	0.0745387
INSIG1	C0	0.55106	0.927	0.91	5.36054e-06	0.103802
SCAMP3	C0	0.292173	0.945	0.93	6.80105e-06	0.131696
HSPB7	C0	0.310134	0.709	0.395	1.10224e-05	0.213438
LSS	C0	0.381476	0.964	0.9	1.90693e-05	0.369259
FDFT1	C0	0.50038	1	1	2.30736e-05	0.446798
ELOVL6	C0	0.257282	0.964	0.875	2.69053e-05	0.520994
CDC42EP5	C0	0.292022	0.836	0.79	3.4412e-05	0.666355
TNNT2	C0	0.905782	0.964	0.9	4.80549e-05	0.930535
PKIB	C0	0.41036	0.927	0.82	4.88406e-05	0.945748
PCYT2	C0	0.304529	0.964	0.89	6.69693e-05	1
HAND2-AS1	C0	0.352915	0.782	0.6	9.11659e-05	1
ACO2	C0	0.272568	0.909	0.95	9.42127e-05	1
MT-CYB	C0	0.403414	1	0.995	0.0001109	1
STARD4	C0	0.264977	0.927	0.79	0.000118171	1
DHCR7	C0	0.391207	0.964	0.97	0.00013342	1
CREG1	C0	0.280053	0.927	0.89	0.000150016	1
MARS	C0	0.285767	1	0.96	0.000155012	1
SLIT2	C0	0.370792	0.836	0.68	0.000166324	1
MSMO1	C0	0.368344	0.964	0.98	0.000167024	1
FDPS	C0	0.470712	1	0.975	0.000179892	1
HMGCS1	C0	0.61802	0.964	0.975	0.000251149	1
HAND2	C0	0.341123	0.873	0.75	0.000297685	1
TSC22D3	C0	0.270142	0.982	0.925	0.00032257	1
PPP1R1A	C0	0.42225	0.473	0.265	0.000353068	1
TECRL	C0	0.8958	0.709	0.465	0.000446574	1
MVD	C0	0.429921	1	0.95	0.000468633	1
HMGCR	C0	0.299243	0.982	0.97	0.000559499	1
MT-ATP6	C0	0.392744	0.982	1	0.000707914	1
NID2	C0	0.310928	0.727	0.56	0.000783187	1
FADS1	C0	0.337438	1	0.995	0.000853337	1
FABP3	C0	0.527554	0.764	0.655	0.000862512	1
NEAT1	C0	0.62239	0.927	0.86	0.000888252	1
IARS	C0	0.265754	0.927	0.975	0.00094618	1
NEU1	C0	0.367264	1	0.96	0.00112797	1
IDI1	C0	0.459195	0.964	0.98	0.00113632	1
PSAP	C0	0.303884	0.964	0.995	0.00115302	1
MT-ND2	C0	0.592531	1	0.995	0.00119559	1
UNC45B	C0	0.26393	0.418	0.235	0.00124591	1
BMP5	C0	0.285527	0.655	0.46	0.00136127	1
MT-CO1	C0	0.296293	1	1	0.00141071	1
LMO4	C0	0.30822	0.982	0.955	0.0015636	1
MT-ND1	C0	0.532686	0.982	1	0.00180728	1
MEF2C	C0	0.273226	0.745	0.645	0.00216918	1
TMEM97	C0	0.46884	0.982	0.975	0.00217295	1
TTN	C0	0.853031	0.764	0.66	0.0025423	1
MT-ND4L	C0	0.378421	0.982	0.995	0.00256173	1
MT-ND4	C0	0.254391	0.982	0.995	0.00261454	1
ASS1	C0	0.257129	0.8	0.8	0.00277325	1
CRIP2	C0	0.462752	0.873	0.815	0.00299895	1
SEC11C	C0	0.267037	0.964	0.925	0.0034959	1
CYCS	C0	0.313847	1	0.985	0.00350071	1
FAM189B	C0	0.274727	0.927	0.925	0.00356407	1
MALAT1	C0	0.43223	0.982	0.995	0.00387742	1
PPP1R12B	C0	0.261785	0.673	0.505	0.00445449	1
MAFG	C0	0.261105	1	0.94	0.00484907	1
TSPYL2	C0	0.277695	0.909	0.8	0.00498572	1
SQLE	C0	0.282781	0.964	0.995	0.00520537	1
ACLY	C0	0.357283	0.982	0.965	0.00522136	1
TM7SF2	C0	0.35147	0.927	0.96	0.00565146	1
MT-ND5	C0	0.376739	0.982	0.995	0.00570787	1
LPIN1	C0	0.250987	0.836	0.795	0.00659639	1
SCD	C0	0.59249	0.982	0.995	0.00779339	1
MYL4	C0	0.826339	0.764	0.685	0.00803025	1
PLD3	C0	0.262228	1	0.995	0.00815921	1
HES6	C0	0.40284	0.818	0.745	0.0082196	1
PRKAG2	C0	0.369415	0.855	0.795	0.00918419	1
PRDX1	C0	0.635724	1	0.995	0.0098986	1
ACSS2	C0	0.275404	0.764	0.79	0.010681	1
UCP2	C0	0.417009	0.673	0.655	0.0107728	1
ACAT2	C0	0.39224	0.964	0.965	0.0112109	1
EBP	C0	0.254141	0.945	0.96	0.0120983	1
COL6A1	C0	0.346139	0.927	0.915	0.0125811	1
MT-CO3	C0	0.316356	1	0.995	0.0138286	1
PAM	C0	0.352493	0.927	0.91	0.0149509	1
FASN	C0	0.353859	0.964	0.98	0.015415	1
ITM2A	C0	0.352347	0.182	0.36	0.0161364	1
NKX2-5	C0	0.360026	0.509	0.405	0.0188917	1
BTG1	C0	0.26181	0.945	0.985	0.0211193	1
ETV1	C0	0.251134	0.764	0.725	0.0241296	1
COL6A2	C0	0.40463	0.909	0.945	0.0286379	1
ARG2	C0	0.331178	0.873	0.84	0.0309305	1
G6PD	C0	0.320153	0.855	0.83	0.0313404	1
CHCHD10	C0	0.279544	0.964	0.975	0.0349695	1
TNNI1	C0	0.422868	0.836	0.79	0.0362267	1
BAALC	C0	0.300642	0.382	0.285	0.0367282	1
DUSP6	C0	0.27206	0.745	0.685	0.0421974	1
MYOM1	C0	0.290317	0.364	0.24	0.043115	1
AKR1A1	C0	0.273813	0.982	0.965	0.0559304	1
LMO2	C0	0.401279	0.273	0.165	0.0571115	1
MYOZ2	C0	0.276915	0.636	0.555	0.0694247	1
RPS27	C0	0.272505	1	1	0.074663	1
CRIP1	C0	0.278891	0.418	0.305	0.0792637	1
MFGE8	C0	0.261929	0.964	0.985	0.102279	1
GNG11	C0	0.599069	0.309	0.445	0.119654	1
TCF21	C0	0.287671	0.436	0.34	0.126356	1
AL627171.2	C0	0.258416	0.455	0.555	0.136015	1
EPRS	C0	0.25294	0.982	0.955	0.149022	1
ACTA1	C0	0.594813	0.6	0.52	0.199814	1
MYL7	C0	0.286794	1	1	0.263643	1
ANGPT1	C0	0.253852	0.255	0.2	0.279139	1
RGS5	C0	0.396375	0.636	0.585	0.403044	1
ANK3	C0	0.28972	0.818	0.8	0.404263	1
PLAT	C0	0.268438	0.545	0.64	0.449018	1
VCAN	C0	0.375517	0.873	0.865	0.591021	1
FTL	C0	0.278262	1	1	0.688046	1
GOLIM4	C0	0.288458	0.873	0.925	0.860669	1
TP53	C0	0.287195	1	0.99	0.863147	1
HAND2-AS1	C3	0.844839	0.977	0.841	3.3507e-13	6.4883e-09
MTRNR2L8	C3	1.04511	1	0.987	4.38342e-10	8.48805e-06
FNIP2	C3	0.615601	0.932	0.781	4.83087e-09	9.3545e-05
RNF187	C3	0.465444	1	0.98	2.39138e-08	0.000463067
MT-ND3	C3	0.539674	1	1	5.85612e-08	0.00113398
EEF1A2	C3	0.412421	0.909	0.662	2.09998e-07	0.00406641
MYH7B	C3	0.527455	0.909	0.815	2.45188e-07	0.00474783
SLC25A6	C3	0.352132	1	1	2.56394e-07	0.00496481
WSB1	C3	0.412061	0.977	0.993	3.62422e-07	0.00701793
SLC7A11	C3	0.477657	0.955	0.821	6.91219e-07	0.0133848
GOT1	C3	0.503584	1	1	7.09703e-07	0.0137427
VEGFA	C3	0.505593	1	0.947	7.43085e-07	0.0143891
HAND2	C3	0.450329	0.955	0.828	7.62385e-07	0.0147628
HSPA9	C3	0.391347	1	1	8.96223e-07	0.0173545
NFE2L1	C3	0.383584	1	0.993	1.20096e-06	0.0232555
SHMT2	C3	0.374389	0.955	0.98	1.25715e-06	0.0243435
MT-CO3	C3	0.383317	1	1	1.29643e-06	0.0251041
MTRNR2L12	C3	0.49237	1	0.993	1.55626e-06	0.0301354
ACO2	C3	0.328303	0.977	1	1.73022e-06	0.033504
ABLIM3	C3	0.321664	0.909	0.755	2.39879e-06	0.0464501
ANK2	C3	0.331551	1	0.954	3.14212e-06	0.060844
ATP5F1B	C3	0.374569	1	1	3.23781e-06	0.0626969
PKIB	C3	0.422742	0.977	0.828	3.8605e-06	0.0747547
SCD	C3	0.529541	1	0.993	4.73496e-06	0.0916877
NIBAN1	C3	0.50951	0.955	0.887	5.26311e-06	0.101915
LDLR	C3	0.529409	0.977	0.934	5.86857e-06	0.113639
LONP1	C3	0.33022	0.977	0.993	6.00779e-06	0.116335
ACSL3	C3	0.370808	0.977	0.98	6.36195e-06	0.123193
EXOSC6	C3	0.27471	0.955	0.954	7.92739e-06	0.153506
MALAT1	C3	0.499822	1	1	1.02289e-05	0.198072
OIP5-AS1	C3	0.337565	1	1	1.29663e-05	0.251079
ASAP1	C3	0.275345	0.977	0.987	1.53051e-05	0.296367
PCBP1	C3	0.277248	1	1	1.68505e-05	0.326292
SLC25A5	C3	0.303024	0.977	1	2.81868e-05	0.54581
CLIP1	C3	0.270896	1	0.98	2.97325e-05	0.57574
PAM	C3	0.487977	1	1	3.39602e-05	0.657606
TRIB3	C3	0.378753	0.977	0.914	4.15217e-05	0.804026
UBE2M	C3	0.313185	1	0.987	4.47656e-05	0.866842
LSS	C3	0.40767	0.977	0.98	4.68547e-05	0.907295
ZFAND5	C3	0.318978	1	1	6.03149e-05	1
DDIT3	C3	0.384424	1	0.881	7.73672e-05	1
TMBIM6	C3	0.358047	1	1	8.40148e-05	1
SH3KBP1	C3	0.275506	0.977	0.96	8.83305e-05	1
GADD45A	C3	0.368772	0.977	0.974	9.64757e-05	1
SDHA	C3	0.269856	0.977	0.974	9.89234e-05	1
SARS	C3	0.305501	1	0.993	0.000102718	1
ANKRD9	C3	0.270564	0.886	0.808	0.000109492	1
SLC38A1	C3	0.27009	0.977	1	0.000113483	1
MAFG	C3	0.26617	1	0.947	0.000114839	1
LPIN1	C3	0.333961	0.977	0.881	0.000116935	1
MYH6	C3	0.761389	1	1	0.000119255	1
YAP1	C3	0.252413	0.977	0.987	0.000154384	1
MKNK2	C3	0.252813	0.932	0.887	0.000174	1
MT-ND6	C3	0.341874	1	0.974	0.000203929	1
CDKN1C	C3	0.28577	0.886	0.821	0.000226625	1
FLNC	C3	0.416591	1	0.993	0.000246842	1
KIF1A	C3	0.25408	0.977	0.914	0.000269041	1
HMGCS1	C3	0.56773	1	0.987	0.000271338	1
MT-ND4L	C3	0.314131	1	0.993	0.000294626	1
LMO4	C3	0.32866	1	0.993	0.000298101	1
ID4	C3	0.318705	0.636	0.43	0.000335859	1
ARHGEF2	C3	0.290815	0.977	0.861	0.000383496	1
CYP51A1	C3	0.403063	1	0.987	0.000452061	1
CEBPB	C3	0.259684	0.977	0.954	0.000563533	1
CKM	C3	0.72397	0.795	0.682	0.000757607	1
MAST4	C3	0.351214	0.932	0.907	0.000762393	1
MTHFD2	C3	0.302871	0.977	0.974	0.00078241	1
RCAN1	C3	0.26003	0.886	0.834	0.000897132	1
SESN2	C3	0.320419	0.932	0.927	0.00091476	1
RYR2	C3	0.315382	0.955	0.993	0.000931788	1
HMGCR	C3	0.409382	0.977	0.901	0.000933829	1
PDHA1	C3	0.306047	0.977	0.987	0.000994288	1
UQCRC1	C3	0.280732	1	0.993	0.00124491	1
PPP1R12B	C3	0.3651	1	1	0.0012716	1
MSMO1	C3	0.42122	1	0.967	0.00128502	1
GABARAPL1	C3	0.296274	0.955	0.94	0.0014417	1
MT-ND2	C3	0.346761	1	1	0.00161882	1
KLF6	C3	0.270813	0.932	0.874	0.00198491	1
RTN4	C3	0.261076	1	0.993	0.00218063	1
COL6A1	C3	0.261853	1	0.934	0.00222378	1
MT-ATP6	C3	0.264865	1	1	0.00229388	1
ID2	C3	0.29037	0.841	0.768	0.00287568	1
INSIG1	C3	0.353405	0.977	0.894	0.00296505	1
MT-ATP8	C3	0.346917	0.977	0.974	0.00306369	1
DHCR7	C3	0.25889	0.977	0.967	0.00353105	1
DUSP6	C3	0.287552	0.841	0.781	0.00411874	1
GARS	C3	0.263889	0.977	1	0.00496233	1
ACSS2	C3	0.272401	0.955	0.874	0.00522224	1
HRC	C3	0.32062	0.864	0.848	0.00532429	1
NR2F2	C3	0.276486	0.727	0.583	0.00580587	1
BMP2K	C3	0.257827	0.864	0.834	0.00599224	1
MT-ND1	C3	0.292611	1	1	0.00655985	1
PPP1R1A	C3	0.255783	0.886	0.927	0.0066968	1
FDFT1	C3	0.319983	1	1	0.00758896	1
C6orf62	C3	0.257317	1	0.974	0.00779705	1
TMEM97	C3	0.405547	0.977	0.967	0.0085665	1
UNC5B	C3	0.259979	0.955	0.947	0.0091538	1
UCP2	C3	0.301465	0.955	0.94	0.0108146	1
IDI1	C3	0.307207	1	0.987	0.0125319	1
IRS2	C3	0.287803	0.932	0.815	0.0130071	1
MVD	C3	0.339171	0.932	0.974	0.0185637	1
NEAT1	C3	0.385411	0.886	0.868	0.0193679	1
FITM1	C3	0.311161	0.932	0.881	0.0256775	1
FASN	C3	0.253317	1	0.993	0.0307846	1
BLVRB	C3	0.27429	0.909	0.927	0.0363013	1
NMRK2	C3	0.364489	0.5	0.437	0.0421866	1
ZFP36L1	C3	0.27247	0.977	0.987	0.0452851	1
FDPS	C3	0.306718	0.977	0.987	0.048305	1
ACTA1	C3	0.808516	0.864	0.901	0.0554729	1
TP53	C3	0.262195	1	0.993	0.188193	1
ACTG1	C3	0.440719	1	0.993	0.219481	1
UNC5B-AS1	C3	0.640672	0.705	0.775	0.275778	1
GPX3	C3	0.308556	0.773	0.748	0.539724	1
ACTB	C3	0.404904	0.977	0.993	0.704352	1
MTRNR2L8	C1	0.975935	1	0.949	2.63905e-10	5.11025e-06
MT-ND3	C1	0.71618	1	0.975	8.4046e-08	0.00162747
HRC	C1	0.425942	0.977	0.823	9.74755e-08	0.00188752
ACO2	C1	0.420542	1	1	1.37534e-07	0.00266321
MYH7B	C1	0.521777	0.909	0.785	7.48266e-07	0.0144894
MYH6	C1	1.11391	1	1	1.01551e-06	0.0196643
CKM	C1	0.833906	0.932	0.709	1.19683e-06	0.0231754
MT-CO3	C1	0.439172	1	1	1.47392e-06	0.028541
NDRG2	C1	0.299518	0.932	0.772	2.17103e-06	0.0420397
MT-ND1	C1	0.566797	1	0.975	4.8302e-06	0.0935319
ATP5F1B	C1	0.388179	1	1	6.68654e-06	0.129478
AASS	C1	0.345151	0.955	0.886	7.51212e-06	0.145465
WNK2	C1	0.268615	0.795	0.494	1.41111e-05	0.273247
RYR2	C1	0.470337	1	0.949	1.42528e-05	0.27599
WSB1	C1	0.392734	1	0.975	1.60701e-05	0.311181
ATP1B1	C1	0.445993	1	0.987	1.60706e-05	0.31119
MT-ND2	C1	0.677491	1	0.962	1.98992e-05	0.385329
ASPH	C1	0.318338	1	0.899	2.28647e-05	0.442753
MTRNR2L12	C1	0.416823	1	0.962	2.29204e-05	0.44383
ATP5ME	C1	0.30727	1	1	2.4593e-05	0.476218
MT-ND4L	C1	0.603147	1	0.949	3.73006e-05	0.72229
PDGFD	C1	0.28934	0.727	0.456	4.65415e-05	0.90123
MT-ATP6	C1	0.506369	1	1	5.24616e-05	1
ACOT11	C1	0.289549	0.818	0.658	9.01812e-05	1
ID2	C1	0.483819	0.955	0.835	0.000111913	1
SOBP	C1	0.28651	0.932	0.772	0.000119005	1
GPI	C1	0.289623	1	1	0.000123738	1
MSI2	C1	0.278403	0.977	0.886	0.000154201	1
AC092683.1	C1	0.28654	0.682	0.494	0.000171026	1
PLXNA4	C1	0.312748	0.705	0.456	0.00026978	1
MT-ATP8	C1	0.377309	0.955	0.949	0.000274442	1
NID2	C1	0.435671	0.977	0.911	0.000276951	1
PPP1R1A	C1	0.495825	0.977	0.899	0.000329029	1
SYNE2	C1	0.416207	1	0.949	0.000364851	1
FXYD6	C1	0.322949	1	0.911	0.000387112	1
MT-ND4	C1	0.377816	1	1	0.000395422	1
KAT6B	C1	0.263397	0.909	0.873	0.000537698	1
MDH1	C1	0.32915	1	1	0.000586912	1
VEGFB	C1	0.252556	0.977	0.987	0.000653013	1
FREM2	C1	0.291145	0.682	0.43	0.000677805	1
PPP1R12B	C1	0.457971	1	0.987	0.000698661	1
ATP5F1A	C1	0.296104	1	1	0.00076899	1
PRDX2	C1	0.272213	1	1	0.00106028	1
SPHKAP	C1	0.256684	0.727	0.506	0.00115614	1
PGAM2	C1	0.341919	0.841	0.646	0.00118287	1
ID3	C1	0.35159	0.727	0.557	0.00165127	1
MT-CYB	C1	0.331251	1	0.987	0.001868	1
ANK3	C1	0.29107	0.955	0.899	0.00196516	1
NREP	C1	0.481381	1	1	0.00197059	1
MT-ND5	C1	0.53518	1	0.975	0.00247783	1
COL6A1	C1	0.284592	0.977	0.899	0.0025166	1
B2M	C1	0.271599	1	0.962	0.00270274	1
DSP	C1	0.3619	1	0.975	0.00275006	1
SMC1A	C1	0.255886	0.977	0.949	0.00299656	1
VCAM1	C1	0.417956	0.909	0.759	0.00327507	1
TECRL	C1	0.34148	1	1	0.00393199	1
VWDE	C1	0.251629	0.932	0.747	0.00394614	1
FHL2	C1	0.273019	0.932	0.81	0.00404193	1
FBXO32	C1	0.36899	0.977	0.924	0.00406242	1
FAM189A2	C1	0.254358	1	0.924	0.00471795	1
FNIP2	C1	0.314249	0.955	0.911	0.00511523	1
HAND2	C1	0.29448	0.932	0.924	0.00519947	1
MYBPC3	C1	0.26369	0.977	0.975	0.00529349	1
HMGB2	C1	0.404433	1	0.987	0.00538065	1
NID1	C1	0.2653	0.864	0.81	0.00590114	1
SLC25A6	C1	0.28379	1	1	0.00622237	1
MT-CO2	C1	0.260618	1	0.987	0.00632286	1
IGFBP2	C1	0.275143	0.977	0.937	0.0100228	1
PLN	C1	0.420999	1	0.987	0.0102588	1
PKM	C1	0.253318	1	1	0.0128523	1
DUSP27	C1	0.250593	0.909	0.861	0.0214504	1
GOLIM4	C1	0.25792	0.977	0.886	0.0226063	1
PYGB	C1	0.262112	0.932	0.924	0.0272017	1
FITM1	C1	0.286955	0.932	0.962	0.027779	1
MB	C1	0.346905	0.864	0.747	0.0307451	1
MALAT1	C1	0.3706	1	0.987	0.034134	1
ASPM	C1	0.27627	0.977	0.886	0.0421572	1
SCD	C1	0.296728	1	0.975	0.0499729	1
HAND2-AS1	C1	0.353566	0.841	0.835	0.0523047	1
SC5D	C1	0.260555	0.977	0.949	0.0524832	1
PEG10	C1	0.375181	0.932	0.899	0.0563776	1
TRH	C1	0.552796	0.705	0.646	0.0624495	1
CORIN	C1	0.253462	0.841	0.747	0.062994	1
H19	C1	0.252513	0.727	0.481	0.071612	1
TOP2A	C1	0.435663	0.909	0.937	0.0959058	1
MYL3	C1	0.315688	1	0.975	0.105829	1
NEAT1	C1	0.571277	0.795	0.797	0.189714	1
IGFBP5	C1	0.371746	0.705	0.696	0.203888	1
HMGCS1	C1	0.301474	1	1	0.212077	1
CENPF	C1	0.288324	0.932	0.962	0.270099	1
PTN	C1	0.254816	0.886	0.848	0.306623	1
HIST1H4C	C1	0.625799	1	1	0.452117	1
MT-ND6	C1	0.298658	0.955	0.949	0.461668	1
NR2F2	C1	0.293578	0.455	0.481	0.653708	1
RRM2	C1	0.324139	0.773	0.848	0.748863	1
SFRP1	C1	0.356887	0.955	0.937	0.930617	1
MYH6	C5	1.1795	1	1	1.28781e-09	2.49371e-05
MTRNR2L8	C5	1.07907	0.977	1	6.84341e-09	0.000132516
ATP5F1B	C5	0.459241	1	1	3.41052e-07	0.00660413
PYGM	C5	0.50586	0.93	0.75	3.85536e-07	0.00746552
MT-ND3	C5	0.578848	0.977	1	6.62111e-07	0.0128211
PDGFD	C5	0.385136	0.907	0.767	7.34868e-07	0.01423
PPP1R1A	C5	0.783213	1	0.9	1.26253e-06	0.0244477
MT-ND1	C5	0.554411	1	1	2.15734e-06	0.0417748
SGPP2	C5	0.295329	0.558	0.15	2.61785e-06	0.0506921
ACO2	C5	0.456341	1	0.983	2.62757e-06	0.0508803
NDUFB1	C5	0.378589	1	0.983	3.30074e-06	0.0639155
MT-CO3	C5	0.35046	1	1	3.40947e-06	0.066021
PKM	C5	0.371277	1	1	4.55544e-06	0.0882115
PEG10	C5	0.564881	0.907	0.717	4.56941e-06	0.0884821
CREM	C5	0.452585	1	0.983	8.56569e-06	0.165866
ATP5F1A	C5	0.350335	1	1	8.56569e-06	0.165866
ATP5ME	C5	0.395633	1	1	9.40271e-06	0.182074
EEF1A2	C5	0.450222	0.93	0.833	9.50174e-06	0.183992
GPI	C5	0.346736	1	1	1.03175e-05	0.199789
NID2	C5	0.401848	0.953	0.967	1.95395e-05	0.378363
RYR2	C5	0.435739	1	0.983	2.20334e-05	0.426654
MT-ND2	C5	0.579737	0.977	1	2.20334e-05	0.426654
ATP1B1	C5	0.492427	0.977	1	2.40902e-05	0.466482
MYH7B	C5	0.41097	0.977	0.983	2.75196e-05	0.53289
MDH1	C5	0.365659	1	1	4.20175e-05	0.813626
MYZAP	C5	0.367794	1	0.95	4.99168e-05	0.966589
FREM2	C5	0.329242	0.791	0.433	5.22444e-05	1
CS	C5	0.416985	0.977	1	5.28625e-05	1
GSTM4	C5	0.299195	0.953	0.817	5.99082e-05	1
COX7C	C5	0.284932	1	1	6.44805e-05	1
COX4I1	C5	0.293617	1	1	6.44805e-05	1
FBXL22	C5	0.377949	0.953	0.75	9.1941e-05	1
GBA2	C5	0.308375	1	0.917	9.26555e-05	1
ATP5PB	C5	0.299486	1	1	0.000106446	1
SLC25A5	C5	0.385734	1	1	0.00012205	1
HAND2	C5	0.406123	0.907	0.917	0.00013537	1
FITM1	C5	0.397885	1	0.95	0.000143598	1
SCP2	C5	0.432618	1	0.967	0.000182802	1
MT-ND4L	C5	0.344439	0.977	1	0.00020872	1
FNIP2	C5	0.458789	0.884	0.767	0.000210171	1
NDRG2	C5	0.296589	0.977	0.867	0.000224806	1
EIF3L	C5	0.277547	1	0.967	0.000231883	1
UQCRB	C5	0.32152	1	1	0.000244363	1
IGFBP2	C5	0.643599	1	0.917	0.000278133	1
MT-ATP8	C5	0.455165	0.953	0.967	0.000278241	1
PRDX2	C5	0.378613	1	1	0.000429969	1
UQCRC2	C5	0.273366	1	0.983	0.000487497	1
HAND2-AS1	C5	0.407944	0.953	0.85	0.000508461	1
NREP	C5	0.696079	1	1	0.000538605	1
TCEA3	C5	0.300879	1	0.867	0.000550511	1
SLC25A6	C5	0.333949	1	1	0.000609512	1
MEF2C	C5	0.45702	1	0.967	0.000624675	1
VWDE	C5	0.314829	0.907	0.617	0.000731173	1
TSPAN32	C5	0.256072	0.628	0.433	0.000766085	1
CKM	C5	0.743704	1	0.9	0.000777187	1
IGFBP5	C5	0.664136	0.86	0.733	0.000890007	1
COX6B1	C5	0.279561	1	1	0.00103726	1
SAT1	C5	0.279267	0.767	0.517	0.00110251	1
NDUFB9	C5	0.29551	1	0.983	0.00114004	1
LPCAT4	C5	0.26977	0.86	0.683	0.00136072	1
SOD2	C5	0.255128	1	1	0.00137441	1
MT-ATP6	C5	0.298051	1	1	0.00147322	1
MB	C5	0.406286	1	0.933	0.00157806	1
LAMA1	C5	0.372519	0.674	0.467	0.00163537	1
MTRNR2L12	C5	0.251071	0.977	1	0.00176956	1
KCTD12	C5	0.327449	0.674	0.367	0.00194503	1
LDHB	C5	0.286431	1	1	0.00198164	1
TECRL	C5	0.40561	1	1	0.00216783	1
NEFL	C5	0.250885	0.535	0.283	0.00223205	1
DSP	C5	0.3274	1	1	0.00247734	1
COX7B	C5	0.393222	1	1	0.0028268	1
SEPTIN6	C5	0.259365	0.884	0.8	0.00301825	1
NDUFV1	C5	0.256288	1	0.983	0.00358653	1
LBH	C5	0.425921	0.977	1	0.00366408	1
KRT19	C5	0.418418	0.93	0.733	0.0040453	1
MDH2	C5	0.279408	1	1	0.00416225	1
UQCRFS1	C5	0.262877	1	1	0.00443371	1
MYL3	C5	0.278624	1	1	0.0045277	1
GLRX5	C5	0.268571	1	0.983	0.0045277	1
MDK	C5	0.273886	1	1	0.00513055	1
SPHKAP	C5	0.313083	0.93	0.85	0.00547795	1
UQCRC1	C5	0.269619	1	0.983	0.00568734	1
DMAC1	C5	0.256263	1	0.917	0.00604424	1
TRIOBP	C5	0.284811	1	0.95	0.00617083	1
FAM189A2	C5	0.308572	0.93	0.983	0.00636083	1
CYC1	C5	0.268601	1	1	0.00833423	1
HIGD2A	C5	0.255053	1	1	0.00901537	1
AASS	C5	0.30008	0.907	0.917	0.00991204	1
IRX2	C5	0.423864	0.837	0.65	0.0119678	1
SYNE2	C5	0.327184	0.837	0.833	0.0120697	1
APCDD1	C5	0.315509	0.744	0.583	0.0121275	1
TRH	C5	0.476457	0.674	0.533	0.0125271	1
COX5A	C5	0.259435	1	0.983	0.0147853	1
C1orf105	C5	0.260136	0.767	0.667	0.0154844	1
GOT1	C5	0.287271	1	1	0.0159156	1
ATP5MC1	C5	0.2508	1	0.983	0.0165087	1
AC107068.2	C5	0.273329	0.442	0.283	0.0171233	1
PPP1R12B	C5	0.295812	1	0.983	0.0174348	1
FHL2	C5	0.26553	1	0.883	0.0183882	1
NDUFA1	C5	0.270328	1	0.983	0.0197747	1
FXYD6	C5	0.257474	1	0.917	0.0223769	1
RHOQ	C5	0.260422	1	1	0.0252883	1
NFIA	C5	0.342947	0.907	0.917	0.0294433	1
LRRC10	C5	0.285099	0.884	0.85	0.0316046	1
TFRC	C5	0.260444	0.814	0.733	0.036644	1
MT-ND5	C5	0.380673	1	1	0.0437704	1
LMO4	C5	0.296436	0.93	0.983	0.0508427	1
PTPRK	C5	0.270571	0.907	0.85	0.0651465	1
ANGPT1	C5	0.347867	0.605	0.45	0.081682	1
