# Supplementary material for: Single-cell transcriptomic profiling reveals specific maturation signatures in human cardiomyocytes derived from LMNB2-inactivated induced pluripotent stem cells
Source: Front Cell Dev Biol. 2022 Nov 28;10:895162. doi: 10.3389/fcell.2022.895162 (PMC9742441; doi:10.3389/fcell.2022.895162)
Supplement: Supplementary file 5 [file Table1.XLSX]

## Sheet: iPS.merge.MAST.0
	p_val	avg_log2FC	pct.1	pct.2	p_val_adj
USP9X	3.92771e-97	-0.491486	0.97	0.634	7.55848e-93
SPRY4	1.61586e-91	0.417393	0.907	0.181	3.10957e-87
DUSP6	5.7473e-81	0.694482	0.917	0.239	1.10601e-76
AUTS2	1.14472e-80	-0.26468	0.896	0.515	2.20291e-76
NFE2L3	1.0344e-76	0.707414	0.952	0.447	1.99059e-72
CRABP2	3.12249e-74	-0.777875	0.912	0.68	6.00892e-70
FRAT2	3.08826e-71	-0.437696	0.879	0.605	5.94305e-67
UGP2	2.01831e-69	-0.738837	0.987	0.858	3.88403e-65
IRX2	1.46382e-68	-0.593434	0.604	0.447	2.81698e-64
ID1	2.76625e-64	-0.518551	0.924	0.647	5.32338e-60
MTA3	6.33442e-63	-0.393994	0.934	0.702	1.219e-58
ASS1	4.81031e-61	-0.354717	0.886	0.589	9.25696e-57
TMEM132B	1.21585e-59	0.324551	0.871	0.291	2.33978e-55
CCNG1	6.06756e-59	-0.304875	0.97	0.741	1.16764e-54
DHCR24	1.30489e-57	0.777506	0.977	0.524	2.51112e-53
VCAN	6.3364e-57	0.491409	0.962	0.453	1.21938e-52
TRIM24	1.98122e-56	-0.31993	0.952	0.638	3.81266e-52
AP000459.2	2.00716e-56	0.347274	0.891	0.327	3.86258e-52
SEMA6A	4.5052e-56	0.683578	0.972	0.534	8.6698e-52
SLC2A3	4.63929e-56	0.766084	0.982	0.57	8.92785e-52
CITED2	9.07417e-56	-0.409004	0.818	0.537	1.74623e-51
METTL7A	1.00687e-55	0.264999	0.801	0.223	1.93761e-51
RBM47	2.5956e-55	0.474253	0.934	0.44	4.99497e-51
THY1	2.86119e-55	0.659528	0.985	0.673	5.50607e-51
TMEM64	5.43738e-55	-0.254907	0.664	0.443	1.04637e-50
PTPRG	5.72346e-55	0.323496	0.944	0.424	1.10142e-50
AP1S2	8.70332e-55	-0.265576	0.97	0.699	1.67487e-50
OTX2	2.24319e-54	-0.398844	0.657	0.463	4.3168e-50
RABGAP1L	7.38586e-54	-0.335659	0.879	0.566	1.42133e-49
AKIRIN1	9.29385e-54	-0.433376	0.965	0.812	1.78851e-49
SLC4A7	9.44646e-54	0.536754	0.944	0.479	1.81788e-49
TMEM245	1.92756e-53	0.290442	0.937	0.421	3.7094e-49
RPN1	3.92301e-53	0.417961	0.962	0.476	7.54943e-49
HMGCR	8.32953e-53	0.505394	0.952	0.46	1.60293e-48
TNNT1	3.17449e-52	-0.298944	0.914	0.667	6.10899e-48
ITGB5	4.79486e-52	0.393519	0.942	0.44	9.22723e-48
POLR2J3	9.20986e-52	0.2501	0.934	0.443	1.77234e-47
SLC7A11	1.35798e-51	0.330807	0.854	0.311	2.61329e-47
FEZ1	1.63624e-51	-0.318331	0.765	0.524	3.14878e-47
IGDCC3	3.07784e-51	0.463016	0.949	0.479	5.92299e-47
COL4A2	4.6874e-51	0.32061	0.932	0.424	9.02043e-47
ITPR2	5.62425e-51	0.311063	0.879	0.35	1.08233e-46
AL591742.2	5.65369e-51	-0.476652	0.551	0.424	1.088e-46
CD46	7.27344e-51	0.383881	0.949	0.46	1.3997e-46
PXDN	1.24956e-50	0.348341	0.949	0.463	2.40466e-46
SLC16A1	5.76189e-50	0.282697	0.98	0.566	1.10882e-45
QSOX1	6.83277e-50	0.280627	0.924	0.417	1.3149e-45
SLC7A1	7.19489e-50	0.315961	0.917	0.408	1.38458e-45
SPTBN1	9.89521e-50	0.351211	0.975	0.531	1.90423e-45
GLG1	1.10691e-49	0.365713	0.96	0.495	2.13013e-45
MDM4	1.41623e-49	0.298562	0.927	0.424	2.72539e-45
SLC39A14	5.23926e-49	0.449125	0.972	0.557	1.00824e-44
RND3	7.16095e-49	0.259842	0.843	0.304	1.37805e-44
EPHA1	1.22852e-48	0.378956	0.927	0.443	2.36417e-44
DSG2	1.34634e-48	0.400903	0.965	0.508	2.5909e-44
PCDH1	1.57686e-48	0.275906	0.912	0.405	3.03451e-44
GANAB	4.72699e-48	0.327041	0.949	0.485	9.09663e-44
SERPINH1	5.05162e-48	0.651467	0.98	0.706	9.72133e-44
NKTR	5.05624e-48	0.302557	0.955	0.495	9.73023e-44
ANOS1	6.5292e-48	0.299233	0.907	0.405	1.25648e-43
MMP2	1.23289e-47	0.259673	0.871	0.356	2.37258e-43
DST	1.29216e-47	0.29493	0.934	0.46	2.48664e-43
SPTAN1	1.6068e-47	0.293087	0.944	0.472	3.09212e-43
PTPRZ1	3.87712e-47	0.397994	0.962	0.511	7.46114e-43
BOD1L1	4.39272e-47	0.260344	0.932	0.453	8.45335e-43
FLVCR1	4.87074e-47	0.410347	0.937	0.466	9.37325e-43
TPM1	6.21138e-47	-0.510095	0.982	0.864	1.19532e-42
CHPF	6.32123e-47	0.276733	0.896	0.395	1.21646e-42
AK4	1.30749e-46	0.357112	0.955	0.511	2.51614e-42
ADCY2	1.61761e-46	0.281789	0.891	0.385	3.11293e-42
NOTCH1	3.26326e-46	0.26162	0.848	0.327	6.27981e-42
ARHGEF10	4.27654e-46	0.299219	0.942	0.479	8.22978e-42
MACF1	4.97045e-46	0.3831	0.967	0.531	9.56513e-42
NLGN4X	1.11482e-45	0.313349	0.914	0.427	2.14536e-41
CLDN3	3.24277e-45	-0.291829	0.808	0.495	6.24038e-41
SPRY2	5.54984e-45	0.310019	0.821	0.307	1.06801e-40
ACSL3	5.74312e-45	0.328082	0.937	0.472	1.10521e-40
TNRC6C	5.92114e-45	0.273681	0.902	0.411	1.13947e-40
NFE2L1	7.84595e-45	0.266623	0.937	0.476	1.50987e-40
MKI67	1.32115e-44	0.250308	0.949	0.508	2.54242e-40
IQGAP2	1.36166e-44	0.334083	0.914	0.443	2.62039e-40
SLC39A10	2.08669e-44	0.366115	0.965	0.544	4.01563e-40
SLC2A1	2.427e-44	0.465126	0.939	0.492	4.67053e-40
BASP1	2.44206e-44	-0.383567	0.962	0.777	4.6995e-40
ACTN4	2.94951e-44	0.268611	0.972	0.557	5.67604e-40
LRRC8A	3.24799e-44	0.315507	0.929	0.472	6.25044e-40
SLC38A2	3.83995e-44	0.380336	0.972	0.557	7.38959e-40
DCBLD2	4.9547e-44	0.266041	0.912	0.434	9.53483e-40
PNRC1	5.78606e-44	-0.271432	0.821	0.544	1.11347e-39
ZFAND5	6.27045e-44	-0.336107	0.937	0.663	1.20669e-39
SEC63	1.74728e-43	0.326351	0.952	0.518	3.36246e-39
RRBP1	1.83284e-43	0.372102	0.939	0.489	3.52711e-39
ANKRD11	2.93437e-43	0.344984	0.977	0.576	5.64689e-39
ATP13A3	3.35274e-43	0.255798	0.879	0.388	6.45201e-39
PSME1	3.52835e-43	-0.325732	0.869	0.641	6.78996e-39
ASPM	3.74882e-43	0.309635	0.929	0.472	7.21424e-39
PDLIM1	3.81746e-43	-0.442943	0.939	0.786	7.34633e-39
XPO6	4.13095e-43	0.25576	0.927	0.466	7.9496e-39
SREBF2	4.72197e-43	0.258475	0.924	0.466	9.08696e-39
HSPA5	4.82477e-43	0.608813	0.967	0.566	9.28478e-39
MYO6	5.87161e-43	-0.293584	0.864	0.508	1.12993e-38
COL18A1	6.47037e-43	0.326432	0.947	0.511	1.24516e-38
SCD	1.02959e-42	0.739386	0.99	0.706	1.98134e-38
ZFP36L1	1.64456e-42	0.589374	0.967	0.592	3.1648e-38
SHC1	2.06665e-42	0.319428	0.944	0.511	3.97707e-38
FIRRE	2.36061e-42	0.285298	0.899	0.424	4.54276e-38
HSP90B1	2.47294e-42	0.629201	0.982	0.628	4.75893e-38
ACACA	2.93787e-42	0.255604	0.944	0.508	5.65363e-38
KTN1	2.95319e-42	0.416092	0.975	0.576	5.68313e-38
SLC7A5	4.25647e-42	0.410341	0.957	0.544	8.19116e-38
SNHG4	4.53022e-42	0.29486	0.919	0.46	8.71795e-38
ZNF428	4.81854e-42	-0.254275	0.876	0.612	9.2728e-38
RANBP2	5.95593e-42	0.255528	0.927	0.479	1.14616e-37
GLDC	6.69266e-42	0.253996	0.929	0.479	1.28794e-37
AKAP9	6.76224e-42	0.263283	0.914	0.456	1.30133e-37
RNF145	7.13227e-42	0.309227	0.934	0.489	1.37253e-37
IFITM3	7.46314e-42	-0.317915	0.929	0.712	1.43621e-37
SSR1	9.19254e-42	0.263686	0.947	0.515	1.76901e-37
MYC	1.04307e-41	0.306772	0.871	0.388	2.00728e-37
CCDC88A	1.04376e-41	0.324508	0.949	0.521	2.00861e-37
GJC1	1.15925e-41	0.280843	0.912	0.45	2.23087e-37
DCTN2	1.19228e-41	-0.282834	0.924	0.693	2.29443e-37
MAT2A	1.45061e-41	0.407025	0.949	0.521	2.79155e-37
SC5D	1.54101e-41	0.26338	0.947	0.521	2.96552e-37
ZIC3	1.70533e-41	-0.250044	0.679	0.453	3.28173e-37
GOLGA4	2.10601e-41	0.285646	0.934	0.495	4.05282e-37
CDCA7	5.44305e-41	0.372789	0.944	0.518	1.04746e-36
SLC1A5	5.59662e-41	0.460362	0.957	0.579	1.07701e-36
TM9SF3	6.01407e-41	0.291273	0.952	0.531	1.15735e-36
LMAN1	8.4584e-41	0.32234	0.955	0.537	1.62773e-36
GRID2	1.40117e-40	0.273349	0.891	0.424	2.6964e-36
PSAP	1.57257e-40	0.292323	0.965	0.57	3.02625e-36
GLUL	2.01613e-40	-0.355312	0.947	0.748	3.87983e-36
DYNC1H1	2.70153e-40	0.31186	0.957	0.553	5.19882e-36
ATP2A2	2.90568e-40	0.260063	0.949	0.534	5.59169e-36
ETV4	2.91295e-40	0.354988	0.937	0.524	5.60568e-36
BUB1	3.10672e-40	-0.278861	0.912	0.628	5.97858e-36
ITGB1	5.05691e-40	0.427311	0.967	0.586	9.73153e-36
FADS2	5.35408e-40	0.483327	0.962	0.576	1.03034e-35
ECI2	5.99219e-40	-0.351758	0.909	0.68	1.15314e-35
VCL	6.11932e-40	0.465398	0.967	0.586	1.1776e-35
RDH11	7.23837e-40	0.382002	0.955	0.547	1.39295e-35
CKB	7.24113e-40	-0.49728	0.975	0.88	1.39348e-35
ASH2L	8.07847e-40	-0.258052	0.871	0.583	1.55462e-35
APP	8.2522e-40	0.440361	0.962	0.563	1.58805e-35
PDIA4	1.90232e-39	0.401061	0.949	0.54	3.66083e-35
KAT7	2.23854e-39	0.333138	0.929	0.511	4.30785e-35
RMST	3.13568e-39	0.283149	0.831	0.35	6.03431e-35
XBP1	3.82471e-39	0.362872	0.934	0.518	7.36028e-35
LINC00662	1.3477e-38	0.354635	0.909	0.476	2.59351e-34
STT3B	1.56112e-38	0.279487	0.932	0.508	3.00422e-34
CCND2	1.60781e-38	0.356973	0.977	0.615	3.09406e-34
SOX4	1.6628e-38	0.593092	0.99	0.816	3.19989e-34
KIF5C	2.68612e-38	-0.295401	0.947	0.625	5.16917e-34
FN1	4.06722e-38	0.253246	0.831	0.356	7.82695e-34
IMPDH2	4.14943e-38	-0.400842	0.96	0.838	7.98516e-34
JADE1	5.15971e-38	0.415653	0.975	0.615	9.92935e-34
C12orf57	7.0051e-38	-0.285618	0.947	0.751	1.34806e-33
SCG3	1.1322e-37	0.280897	0.932	0.518	2.17881e-33
SLC25A36	1.23387e-37	0.262538	0.937	0.524	2.37445e-33
PLAAT3	1.2663e-37	-0.346175	0.934	0.728	2.43686e-33
LINC01356	1.71087e-37	-0.454868	0.793	0.54	3.29241e-33
HSD17B12	2.45589e-37	0.359457	0.96	0.576	4.72612e-33
CYP51A1	2.47455e-37	0.288138	0.967	0.592	4.76203e-33
FAM222B	2.84712e-37	0.289558	0.917	0.489	5.47899e-33
CELF1	5.06623e-37	0.290309	0.982	0.634	9.74946e-33
AURKA	5.55191e-37	-0.352242	0.907	0.592	1.06841e-32
PCDH18	8.00309e-37	-0.271773	0.644	0.417	1.54011e-32
ATP1A1	1.50254e-36	0.300568	0.962	0.586	2.89149e-32
SNHG3	4.14325e-36	0.25947	0.957	0.583	7.97327e-32
PAPSS1	4.52015e-36	-0.265366	0.917	0.673	8.69857e-32
FAM50A	5.72253e-36	-0.255475	0.904	0.608	1.10124e-31
MT-CO2	5.95003e-36	0.476492	1	0.819	1.14502e-31
MTDH	6.7284e-36	0.329902	0.947	0.557	1.29481e-31
VPS26A	1.0515e-35	-0.253482	0.896	0.602	2.02351e-31
PMF1	1.06186e-35	-0.299829	0.937	0.725	2.04345e-31
ERBB2	1.29701e-35	0.322196	0.939	0.544	2.49596e-31
MT-ND2	2.28934e-35	0.450628	0.987	0.68	4.4056e-31
SQLE	4.19929e-35	0.308928	0.967	0.608	8.08112e-31
MT-ND4	9.29622e-35	0.499438	0.992	0.793	1.78896e-30
GNAI3	1.33366e-34	-0.250122	0.922	0.67	2.56649e-30
MT-ATP6	1.4091e-34	0.390279	0.997	0.825	2.71168e-30
RNF5	1.74345e-34	-0.256967	0.904	0.673	3.3551e-30
NDUFS4	4.06713e-34	-0.260853	0.917	0.67	7.82678e-30
SFRP2	4.15493e-34	0.501842	0.992	0.812	7.99575e-30
JARID2	4.36173e-34	0.419234	0.975	0.654	8.39371e-30
NOP53	4.42467e-34	-0.308958	0.952	0.803	8.51483e-30
TAF1D	6.14188e-34	0.286249	0.962	0.605	1.18194e-29
EIF3L	7.31452e-34	-0.281034	0.957	0.822	1.40761e-29
MDN1	7.36314e-34	0.265235	0.97	0.625	1.41696e-29
CALU	8.68777e-34	0.250177	0.962	0.605	1.67188e-29
UQCRC2	9.9206e-34	-0.303026	0.937	0.722	1.90912e-29
VIM	1.05172e-33	-0.283893	0.874	0.628	2.02393e-29
FADS1	1.14282e-33	0.271505	0.967	0.621	2.19925e-29
RAB11A	1.61928e-33	-0.280623	0.952	0.754	3.11614e-29
BRK1	1.89271e-33	-0.267308	0.957	0.78	3.64232e-29
SLC38A1	2.0852e-33	0.318512	0.98	0.654	4.01275e-29
ANXA5	2.47636e-33	-0.260212	0.967	0.757	4.7655e-29
FXR1	3.48667e-33	-0.327927	0.972	0.835	6.70975e-29
NARF	3.55047e-33	-0.25975	0.904	0.65	6.83252e-29
MT-CYB	3.83449e-33	0.366266	0.992	0.767	7.37908e-29
MT-ND3	4.45647e-33	0.481801	0.982	0.699	8.57603e-29
CD81	4.53709e-33	0.288912	0.957	0.602	8.73117e-29
DDIT4	5.33342e-33	-0.340978	0.846	0.583	1.02636e-28
PDIA3	5.86367e-33	0.435884	0.962	0.621	1.1284e-28
SDHC	6.00806e-33	-0.280446	0.949	0.738	1.15619e-28
KRT19	9.8054e-33	-0.418777	0.932	0.764	1.88695e-28
C14orf119	1.66057e-32	-0.281311	0.929	0.702	3.19559e-28
EIF4EBP2	2.73368e-32	0.290117	0.96	0.612	5.2607e-28
SDCBP	3.27653e-32	-0.267849	0.929	0.68	6.30536e-28
NANOG	4.91458e-32	0.269272	0.929	0.557	9.45761e-28
COPZ1	9.42169e-32	-0.261347	0.909	0.638	1.81311e-27
RPN2	1.79306e-31	0.339938	0.97	0.641	3.45057e-27
MT-CO3	2.08195e-31	0.30934	0.992	0.809	4.0065e-27
RTCB	3.09593e-31	-0.343799	0.939	0.712	5.9578e-27
RCN1	3.62916e-31	0.27878	0.955	0.608	6.98396e-27
CXXC5	8.62313e-31	0.340258	0.942	0.599	1.65943e-26
DUT	9.28828e-31	-0.280128	0.975	0.799	1.78744e-26
GAS5	9.95119e-31	-0.275205	0.987	0.871	1.91501e-26
HNRNPA0	1.01536e-30	-0.411235	0.967	0.858	1.95395e-26
LMO4	1.03382e-30	0.316614	0.949	0.605	1.98947e-26
GABARAP	1.04415e-30	-0.311583	0.955	0.825	2.00936e-26
DHCR7	1.13185e-30	0.270412	0.927	0.557	2.17813e-26
CDK2AP1	1.49068e-30	0.405711	0.955	0.625	2.86867e-26
SEPTIN11	1.7658e-30	-0.26048	0.957	0.728	3.39811e-26
AL117378.1	1.85645e-30	0.274495	0.864	0.456	3.57255e-26
NDUFA3	1.88808e-30	-0.254226	0.962	0.748	3.63342e-26
PDHB	2.00601e-30	-0.257838	0.929	0.702	3.86036e-26
OAT	2.05872e-30	-0.252706	0.922	0.68	3.96179e-26
UTP18	2.10153e-30	-0.355014	0.907	0.686	4.04418e-26
MT-CO1	3.63099e-30	0.259254	0.985	0.751	6.98749e-26
NDUFS2	3.72772e-30	-0.36721	0.896	0.667	7.17362e-26
MT-ND1	3.90031e-30	0.266724	0.985	0.712	7.50577e-26
TCEA1	4.0879e-30	-0.283634	0.975	0.822	7.86675e-26
DNAJC8	5.99878e-30	-0.312496	0.97	0.796	1.15441e-25
DPYSL3	6.31595e-30	-0.296017	0.967	0.806	1.21544e-25
PSMD6	7.11236e-30	-0.286209	0.909	0.657	1.3687e-25
CANX	7.26143e-30	0.325196	0.967	0.647	1.39739e-25
CCNB2	8.33312e-30	-0.253761	0.929	0.693	1.60363e-25
CDK1	9.68945e-30	-0.352914	0.904	0.65	1.86464e-25
LMNB1	1.17471e-29	-0.423478	0.96	0.751	2.26062e-25
TALDO1	1.23066e-29	-0.424516	0.96	0.845	2.36829e-25
COPS6	1.27305e-29	-0.345214	0.944	0.748	2.44985e-25
SLC3A2	1.36968e-29	0.54453	0.937	0.608	2.63582e-25
NUSAP1	1.53249e-29	-0.251848	0.922	0.667	2.94913e-25
MT1G	1.77906e-29	0.323075	0.609	0.191	3.42363e-25
CRABP1	2.65819e-29	-0.29835	0.914	0.693	5.11542e-25
ATXN10	2.76628e-29	-0.455011	0.924	0.767	5.32343e-25
CALR	3.02252e-29	0.460016	0.992	0.777	5.81654e-25
EIF4A2	3.21811e-29	-0.397524	0.977	0.874	6.19293e-25
ATP5PD	3.80504e-29	-0.352041	0.96	0.809	7.32242e-25
MRPS9	6.43112e-29	-0.309414	0.937	0.712	1.2376e-24
TUBB3	7.5551e-29	-0.459731	0.957	0.838	1.4539e-24
PIM3	2.59594e-28	-0.25674	0.864	0.595	4.99563e-24
SRRM2	2.89464e-28	0.26599	0.997	0.761	5.57044e-24
ST13	2.9223e-28	-0.255494	0.977	0.871	5.62368e-24
CBR1	3.53817e-28	0.260591	0.937	0.602	6.80885e-24
SELENOP	3.8418e-28	-0.29766	0.641	0.443	7.39315e-24
SAP18	4.43665e-28	-0.424631	0.962	0.845	8.53789e-24
COPS3	6.52088e-28	-0.285615	0.922	0.683	1.25488e-23
ANXA2	6.99916e-28	-0.304295	0.881	0.673	1.34692e-23
PDHA1	7.35889e-28	-0.272115	0.922	0.693	1.41615e-23
UBC	7.94771e-28	-0.820692	0.967	0.89	1.52946e-23
FKBP1A	1.16895e-27	-0.393525	0.947	0.819	2.24954e-23
EIF4B	1.17388e-27	-0.332051	0.982	0.887	2.25902e-23
MT1X	1.49442e-27	0.438831	0.859	0.476	2.87587e-23
PHC1	2.19552e-27	0.364953	0.995	0.786	4.22507e-23
PTMS	2.25943e-27	-0.435178	0.972	0.906	4.34805e-23
MOB4	2.60016e-27	-0.311696	0.929	0.722	5.00374e-23
PSMD4	4.48137e-27	-0.304475	0.949	0.757	8.62395e-23
PSME2	6.84464e-27	-0.308172	0.912	0.715	1.31718e-22
SEPTIN7	1.04826e-26	-0.305504	0.96	0.777	2.01727e-22
COPE	1.17678e-26	-0.350765	0.932	0.767	2.2646e-22
ID3	1.18509e-26	0.307299	0.965	0.67	2.28059e-22
ATIC	1.33205e-26	-0.359314	0.922	0.744	2.5634e-22
KPNA2	1.35559e-26	-0.773647	0.962	0.874	2.6087e-22
PHPT1	2.21541e-26	-0.288561	0.934	0.757	4.26334e-22
CHD4	2.22009e-26	0.252098	0.96	0.657	4.27235e-22
MDH1	2.80382e-26	-0.560737	0.955	0.854	5.39566e-22
CCT8	4.65547e-26	-0.444405	0.97	0.877	8.95899e-22
ODC1	5.56133e-26	0.343021	0.967	0.731	1.07022e-21
EIF6	6.05319e-26	-0.274943	0.934	0.725	1.16488e-21
TMSB4X	8.0461e-26	-0.516198	0.995	0.977	1.54839e-21
BCAT1	8.2789e-26	0.255088	0.98	0.715	1.59319e-21
RBPMS2	9.9666e-26	0.309192	0.97	0.702	1.91797e-21
HSD17B4	1.16745e-25	-0.323289	0.917	0.725	2.24663e-21
H1FX	1.47811e-25	-0.287603	0.952	0.799	2.84447e-21
TCP1	3.23842e-25	-0.28019	0.967	0.835	6.23202e-21
PDIA6	3.37632e-25	0.382763	0.985	0.761	6.49739e-21
SKP1	3.37898e-25	-0.411068	0.972	0.841	6.50252e-21
MIR302CHG	3.88889e-25	-0.462653	0.982	0.88	7.48377e-21
RAB13	4.83977e-25	-0.636789	0.967	0.715	9.31365e-21
EIF4A3	5.6629e-25	-0.439186	0.914	0.735	1.08977e-20
MAGED2	7.34277e-25	-0.284419	0.912	0.699	1.41304e-20
APEX1	1.35476e-24	-0.263821	0.962	0.838	2.60709e-20
SNRNP70	1.71385e-24	-0.382606	0.949	0.796	3.29813e-20
TMBIM6	2.01317e-24	0.3155	0.982	0.744	3.87414e-20
EIF3E	4.58033e-24	-0.326875	0.982	0.887	8.81438e-20
DNAJA1	5.30117e-24	-0.403506	0.965	0.809	1.02016e-19
ATP5F1A	6.78227e-24	-0.313747	0.98	0.88	1.30518e-19
BOLA3	9.93681e-24	0.279983	0.949	0.676	1.91224e-19
ATP5F1C	1.00361e-23	-0.421659	0.947	0.851	1.93134e-19
LYAR	1.19917e-23	0.313286	0.937	0.66	2.30769e-19
SMC3	1.47009e-23	-0.377261	0.957	0.799	2.82904e-19
PFDN6	2.44764e-23	-0.258019	0.891	0.67	4.71023e-19
DCAF13	3.29123e-23	-0.30415	0.937	0.728	6.33363e-19
SF3B6	4.52681e-23	-0.269576	0.96	0.793	8.71139e-19
PSMA3	5.09852e-23	-0.39564	0.952	0.812	9.81159e-19
SERPINB9	7.75964e-23	-0.383527	0.396	0.408	1.49327e-18
SEPHS1	8.55014e-23	0.373117	0.987	0.825	1.64539e-18
NR6A1	1.10794e-22	0.278841	0.975	0.731	2.13211e-18
BOP1	1.1498e-22	-0.314056	0.922	0.712	2.21267e-18
CDC20	1.50278e-22	-0.389222	0.944	0.767	2.89194e-18
RBM8A	2.04552e-22	-0.298347	0.962	0.822	3.9364e-18
GLRX3	2.4541e-22	-0.263516	0.942	0.757	4.72268e-18
TOMM5	2.64201e-22	0.397997	0.977	0.78	5.08429e-18
THRAP3	5.2167e-22	-0.302876	0.949	0.79	1.0039e-17
TOP1	6.0773e-22	-0.253414	0.972	0.773	1.16952e-17
OCIAD2	1.40285e-21	0.288889	0.942	0.68	2.69965e-17
PSMC3	2.06208e-21	-0.327932	0.934	0.751	3.96826e-17
SNRPA1	2.62188e-21	-0.275431	0.949	0.777	5.04554e-17
KPNB1	2.94497e-21	0.250376	0.997	0.822	5.66731e-17
TXNL4A	4.33766e-21	0.303618	0.965	0.722	8.3474e-17
PSMC4	5.27442e-21	-0.356567	0.924	0.738	1.01501e-16
HNRNPF	5.92999e-21	-0.337806	0.98	0.877	1.14117e-16
UBE2C	6.48486e-21	-0.325109	0.949	0.754	1.24795e-16
EIF4E	7.11961e-21	-0.25449	0.944	0.767	1.3701e-16
PHGDH	9.11985e-21	-0.433372	0.985	0.926	1.75502e-16
DDX39B	1.07955e-20	-0.283589	0.975	0.835	2.07748e-16
KIF5B	1.67209e-20	-0.251553	0.947	0.764	3.21777e-16
PSMA2	2.93058e-20	-0.286994	0.98	0.848	5.6396e-16
FKBP3	3.38709e-20	-0.287312	0.967	0.816	6.51811e-16
HNRNPAB	4.13847e-20	0.286912	0.992	0.838	7.96408e-16
PCNA	4.9114e-20	-0.333906	0.949	0.754	9.45149e-16
CSRP2	6.34599e-20	-0.286817	0.952	0.803	1.22122e-15
CALM2	6.60796e-20	-0.475548	0.987	0.919	1.27164e-15
ADH5	8.35034e-20	-0.326962	0.97	0.854	1.60694e-15
HNRNPM	1.01964e-19	-0.35184	0.987	0.874	1.9622e-15
TMA7	1.26179e-19	0.365631	0.997	0.913	2.42819e-15
PGK1	1.80658e-19	-0.362138	0.977	0.871	3.47659e-15
CCDC85B	2.44211e-19	0.280007	0.955	0.741	4.6996e-15
RTN4	3.39549e-19	0.26217	0.98	0.773	6.53428e-15
TUBA1C	4.06599e-19	-0.579914	0.962	0.88	7.8246e-15
PSMB3	5.05824e-19	-0.361037	0.944	0.806	9.73408e-15
S100A11	5.82548e-19	-0.412729	0.937	0.79	1.12106e-14
L1TD1	8.21503e-19	0.30706	1	0.89	1.5809e-14
YWHAE	1.0231e-18	-0.263216	0.992	0.922	1.96886e-14
CKS1B	1.09323e-18	-0.298425	0.97	0.845	2.10381e-14
HNRNPA1	1.37074e-18	-0.356674	1	0.974	2.63786e-14
STMN1	1.72973e-18	-0.444442	0.992	0.939	3.32869e-14
COX6C	2.58212e-18	-0.253614	0.97	0.848	4.96902e-14
SRM	3.03783e-18	0.283112	0.975	0.79	5.846e-14
MYL12B	3.38873e-18	-0.294181	0.957	0.822	6.52128e-14
CCT3	7.83541e-18	-0.36456	0.985	0.906	1.50785e-13
PSMD2	8.41372e-18	-0.278882	0.947	0.793	1.61914e-13
HSPA4	8.65015e-18	-0.271042	0.98	0.838	1.66464e-13
EPCAM	9.80236e-18	0.255052	0.967	0.754	1.88637e-13
PRDX6	2.68491e-17	-0.405549	0.982	0.939	5.16685e-13
CCT7	3.47611e-17	-0.329925	0.975	0.877	6.68943e-13
PSMB7	3.56699e-17	-0.29798	0.949	0.809	6.86432e-13
CDC123	4.51381e-17	-0.315743	0.939	0.783	8.68638e-13
CKS2	5.86713e-17	-0.348586	0.965	0.838	1.12907e-12
CCNB1	6.50155e-17	-0.426857	0.937	0.799	1.25116e-12
XRCC5	7.13937e-17	-0.341882	0.99	0.909	1.3739e-12
HMGB2	7.77256e-17	-0.37537	0.975	0.861	1.49575e-12
EIF3K	7.84172e-17	-0.275926	0.977	0.883	1.50906e-12
YWHAZ	1.23426e-16	0.297543	0.972	0.803	2.37521e-12
MORF4L1	2.51787e-16	-0.339191	0.98	0.903	4.84539e-12
ATP5F1B	6.12937e-16	-0.34545	0.985	0.932	1.17954e-11
RTRAF	9.61125e-16	-0.305746	0.972	0.867	1.84959e-11
SLC25A6	1.01763e-15	-0.298302	0.992	0.958	1.95834e-11
PRDX2	1.3598e-15	-0.387405	0.967	0.89	2.61681e-11
NUDC	2.38243e-15	-0.320554	0.965	0.848	4.58476e-11
SRP9	4.17999e-15	-0.304419	0.972	0.896	8.04397e-11
ILF2	4.83135e-15	-0.284403	0.962	0.858	9.29746e-11
ATP5MF	5.82032e-15	-0.259216	0.97	0.874	1.12006e-10
PSMB6	6.16216e-15	-0.27685	0.96	0.845	1.18585e-10
TUBA1A	1.49654e-14	-0.334423	0.967	0.848	2.87994e-10
SLC25A3	4.28362e-14	-0.261324	0.987	0.939	8.2434e-10
LDHB	5.13999e-14	-0.495262	0.995	0.977	9.8914e-10
TUBB4B	6.35371e-14	-0.415813	0.97	0.854	1.22271e-09
NASP	7.09226e-14	-0.541752	0.99	0.964	1.36483e-09
VCP	9.00606e-14	-0.252565	0.967	0.848	1.73313e-09
MYL6	1.10399e-13	-0.345739	0.997	0.951	2.12453e-09
SNRPF	1.51361e-13	-0.291124	0.985	0.916	2.9128e-09
SSBP1	1.98727e-13	-0.250081	0.972	0.864	3.8243e-09
ENO1	2.25456e-13	-0.397784	0.992	0.948	4.33867e-09
PPP1R14B	4.70204e-13	0.25226	0.99	0.887	9.0486e-09
PRDX1	5.46001e-13	-0.625314	0.992	0.987	1.05073e-08
CCT5	6.96513e-13	-0.418886	0.977	0.916	1.34037e-08
TPI1	7.85975e-13	-0.288556	0.992	0.929	1.51253e-08
CCT6A	8.7863e-13	-0.260299	0.977	0.89	1.69083e-08
PRMT1	2.78082e-12	-0.291861	0.977	0.9	5.35141e-08
PKM	3.42334e-12	-0.289663	0.982	0.906	6.58787e-08
UBB	4.47933e-12	-0.308942	0.99	0.929	8.62002e-08
KRT8	7.62077e-12	-0.299372	0.975	0.854	1.46654e-07
HSP90AB1	1.36692e-11	-0.457268	0.997	0.99	2.63049e-07
ACTG1	2.5042e-11	-0.376389	1	0.987	4.81909e-07
SRP14	2.58176e-11	-0.284007	0.987	0.922	4.96835e-07
NPTX1	3.15255e-11	-0.643374	0.235	0.272	6.06676e-07
CYCS	3.32518e-11	-0.25202	0.985	0.893	6.39898e-07
PSIP1	4.59594e-11	-0.25158	0.995	0.935	8.84443e-07
LDHA	8.96678e-11	-0.305687	0.982	0.893	1.72557e-06
SSB	9.24569e-11	-0.360469	0.97	0.9	1.77924e-06
TUBA1B	1.35572e-10	-0.550732	0.997	0.99	2.60894e-06
PTGES3	1.38424e-10	-0.26419	0.99	0.935	2.66382e-06
NDUFS5	1.40962e-10	-0.275312	0.97	0.909	2.71268e-06
TUBB2B	1.59661e-10	-0.289868	0.99	0.945	3.07252e-06
SRSF3	2.37482e-10	-0.262686	0.982	0.903	4.57011e-06
PSMB1	3.94522e-10	-0.291636	0.962	0.883	7.59219e-06
FTH1	5.60074e-10	0.273187	1	0.958	1.07781e-05
HSPA8	1.70137e-09	-0.273539	0.992	0.951	3.27411e-05
NPM1	2.97559e-09	-0.422195	0.997	0.997	5.72622e-05
CUZD1	3.14905e-09	-0.261225	0.306	0.337	6.06003e-05
EIF4A1	8.55238e-09	-0.4961	0.995	0.99	0.000164582
RPL13A	1.51999e-08	-0.269381	1	0.994	0.000292506
TKT	1.70521e-08	-0.272752	0.99	0.955	0.000328151
TUBB	1.82266e-08	-0.298739	1	0.984	0.000350753
GSTP1	8.00875e-07	-0.32991	0.997	0.987	0.015412
NCL	2.31444e-06	-0.363627	0.992	0.964	0.044539
HSP90AA1	2.5549e-06	-0.405999	1	0.994	0.0491665
EEF1A1	3.01849e-06	-0.272171	1	1	0.0580878
CFL1	9.50538e-06	-0.26025	0.995	0.971	0.182922
PPIA	9.98875e-05	-0.259907	1	0.99	1
RAN	0.000199015	-0.287468	0.992	0.974	1

## Sheet: iPS.merge.MAST.1
	p_val	avg_log2FC	pct.1	pct.2	p_val_adj
ATP2B1	7.10428e-143	-0.34637	0.058	0.91	1.36715e-138
LAMC1	1.98476e-137	-0.425289	0.006	0.897	3.81948e-133
IGF2R	2.56167e-131	-0.378791	0.041	0.916	4.92967e-127
ROR1	3.74308e-128	-0.340012	0.058	0.903	7.20318e-124
HYOU1	1.10078e-127	-0.438631	0.058	0.923	2.11835e-123
MARCH6	1.03993e-125	-0.315864	0.088	0.929	2.00124e-121
FLNB	4.04695e-125	-0.273927	0.076	0.893	7.78794e-121
COL4A1	6.65426e-124	-0.450566	0.023	0.908	1.28054e-119
ATP11C	1.0268e-123	-0.250165	0.058	0.89	1.97597e-119
FTX	4.85407e-123	-0.610056	0.023	0.916	9.34118e-119
SELENON	3.09038e-122	-0.27957	0.07	0.904	5.94713e-118
ROBO1	3.63346e-122	-0.35863	0.058	0.91	6.99223e-118
VCAN	5.05238e-122	-0.69241	0.082	0.949	9.7228e-118
POLR2J3	7.22269e-122	-0.909947	0.029	0.94	1.38993e-117
PTPRG	4.65115e-120	-0.545955	0.041	0.933	8.95068e-116
RRBP1	8.58612e-120	-0.553445	0.094	0.949	1.65231e-115
PDPR	1.08879e-119	-0.289017	0.058	0.878	2.09528e-115
ZKSCAN1	1.26872e-119	-0.511637	0.053	0.927	2.44152e-115
ITGA6	8.86265e-118	-0.521273	0.064	0.933	1.70553e-113
CEP350	2.65006e-117	-0.407625	0.023	0.897	5.09978e-113
LRIG1	3.70177e-117	-0.661794	0.023	0.927	7.12369e-113
KCNQ1OT1	5.15603e-117	-0.718471	0.023	0.919	9.92226e-113
SLC6A6	5.4203e-117	-0.401943	0.088	0.919	1.04308e-112
LRP6	1.61305e-116	-0.381597	0.023	0.89	3.10416e-112
UTRN	2.60424e-116	-0.362911	0.082	0.919	5.01161e-112
ANKIB1	3.11523e-116	-0.255964	0.029	0.863	5.99495e-112
ADGRA3	5.87635e-116	-0.302019	0.035	0.873	1.13084e-111
TENM3	9.36323e-116	-0.416433	0.047	0.916	1.80186e-111
IQGAP1	1.02994e-115	-0.533364	0.099	0.944	1.98201e-111
ADGRL1	2.37649e-115	-0.260656	0.058	0.878	4.57332e-111
TMEM245	2.48028e-115	-0.527446	0.047	0.923	4.77306e-111
SORL1	2.51672e-115	-0.379778	0.041	0.89	4.84318e-111
PTPRF	3.96428e-115	-0.540947	0.123	0.953	7.62886e-111
LAMB1	1.14326e-114	-0.266038	0.029	0.852	2.2001e-110
BOD1L1	1.35435e-114	-0.551965	0.058	0.934	2.60632e-110
DST	2.84172e-114	-0.714598	0.07	0.936	5.4686e-110
SLC39A6	7.09977e-114	-0.282096	0.088	0.912	1.36628e-109
PXDN	4.69421e-113	-0.728129	0.076	0.948	9.03353e-109
FAT1	4.76092e-113	-0.414776	0.035	0.899	9.16192e-109
AKAP12	4.89084e-113	-0.254926	0.17	0.953	9.41193e-109
EFR3A	6.42164e-113	0.257564	0.187	0.8	1.23578e-108
ANKRD12	1.81051e-112	-0.283973	0.082	0.893	3.48414e-108
CD46	4.76385e-112	-0.648007	0.076	0.946	9.16756e-108
DIAPH1	1.30053e-111	-0.359443	0.088	0.899	2.50274e-107
QSOX1	2.43678e-111	-0.413555	0.058	0.908	4.68934e-107
GLG1	5.15377e-111	-0.80381	0.111	0.963	9.91792e-107
AKAP9	3.71826e-110	-0.64011	0.058	0.923	7.15542e-106
KHDC4	4.41312e-110	-0.257452	0.07	0.897	8.4926e-106
TPMT	5.66501e-110	0.276266	0.292	0.863	1.09018e-105
HMGCR	7.10909e-110	-0.6208	0.099	0.94	1.36807e-105
SPTBN1	1.08017e-109	-0.599065	0.181	0.972	2.07867e-105
CDH1	1.15601e-109	-0.74005	0.058	0.921	2.22462e-105
COPS3	2.17982e-109	0.548928	0.491	0.921	4.19486e-105
GOLGB1	2.62106e-109	-0.418043	0.094	0.923	5.04396e-105
GALNT2	2.8739e-109	-0.345847	0.053	0.901	5.53054e-105
CHD8	2.93516e-109	-0.359365	0.146	0.931	5.64841e-105
DAG1	3.0486e-109	-0.52841	0.041	0.903	5.86672e-105
TMEM87A	5.98308e-109	-0.265083	0.07	0.895	1.15138e-104
C1D	6.08502e-109	0.339613	0.339	0.888	1.171e-104
LRP1	1.31826e-108	-0.510243	0.041	0.904	2.53687e-104
PLXNB2	2.91731e-108	-0.291772	0.023	0.858	5.61406e-104
PRRC2B	3.27464e-108	-0.469261	0.164	0.964	6.30171e-104
ZNF292	4.26254e-108	-0.289403	0.146	0.927	8.20283e-104
NKTR	5.48044e-108	-0.588939	0.123	0.955	1.05466e-103
ACSL3	5.88724e-108	-0.546899	0.099	0.936	1.13294e-103
ERBB3	6.37305e-108	-0.274314	0.047	0.863	1.22643e-103
ARHGEF10	6.46267e-108	-0.621873	0.099	0.944	1.24368e-103
CCDC47	1.729e-107	-0.457387	0.099	0.933	3.32729e-103
VANGL2	2.20491e-107	-0.311972	0.041	0.865	4.24313e-103
CDH3	3.36368e-107	-0.46368	0.082	0.91	6.47306e-103
COL4A2	3.67179e-107	-0.540422	0.053	0.919	7.066e-103
IGF1R	4.12382e-107	-0.358798	0.105	0.906	7.93587e-103
IQGAP2	5.02097e-107	-0.306027	0.099	0.903	9.66236e-103
NOTCH3	7.82395e-107	-0.46402	0.018	0.886	1.50564e-102
COL18A1	1.2502e-106	-0.736334	0.129	0.957	2.40589e-102
ADAM10	1.35038e-106	-0.468917	0.076	0.919	2.59867e-102
ARID1B	1.72512e-106	-0.66112	0.117	0.951	3.31981e-102
XAB2	1.72791e-106	0.280013	0.228	0.788	3.32519e-102
WDR75	1.7709e-106	0.333469	0.316	0.88	3.40792e-102
ALDH16A1	3.78935e-106	0.252304	0.287	0.867	7.29222e-102
POR	6.54237e-106	-0.465478	0.099	0.931	1.25901e-101
SPTAN1	7.02223e-106	-0.498413	0.111	0.938	1.35136e-101
CAPZA2	9.46235e-106	0.308834	0.415	0.921	1.82093e-101
YLPM1	9.80609e-106	-0.286577	0.123	0.908	1.88708e-101
FRAS1	1.04412e-105	-0.422158	0.018	0.865	2.0093e-101
IFT27	1.08066e-105	0.251321	0.281	0.888	2.07961e-101
TGOLN2	1.1171e-105	-0.396688	0.07	0.91	2.14975e-101
USP7	2.52139e-105	-0.279929	0.193	0.942	4.85216e-101
SLC5A3	3.00557e-105	-0.380355	0.018	0.85	5.78391e-101
SPAG9	3.75686e-105	-0.261942	0.088	0.895	7.22971e-101
TFRC	3.76467e-105	-0.366183	0.129	0.936	7.24472e-101
MIAT	5.44279e-105	-0.719643	0.012	0.871	1.04741e-100
CERS6	9.16533e-105	-0.252441	0.053	0.85	1.76378e-100
MACF1	1.2344e-104	-0.513278	0.187	0.964	2.37547e-100
MEX3A	1.25291e-104	-0.553593	0.105	0.931	2.41109e-100
SBK1	1.33641e-104	-0.330161	0.135	0.925	2.57178e-100
DDR1	1.49521e-104	-0.336524	0.14	0.929	2.87739e-100
CARS	2.16749e-104	0.35356	0.392	0.91	4.17112e-100
ZNF318	2.18766e-104	-0.257934	0.041	0.843	4.20993e-100
RPN1	2.45879e-104	-0.658881	0.111	0.953	4.73169e-100
LBR	2.62636e-104	-0.320494	0.123	0.931	5.05417e-100
LGR4	3.29909e-104	-0.335837	0.035	0.871	6.34877e-100
GANAB	4.07276e-104	-0.787948	0.111	0.949	7.83762e-100
MSI2	5.58298e-104	-0.430511	0.129	0.938	1.07439e-99
VEZT	5.93781e-104	-0.311955	0.076	0.89	1.14267e-99
DCBLD2	7.04981e-104	-0.43936	0.07	0.904	1.35667e-99
PITPNC1	7.41591e-104	0.257092	0.333	0.89	1.42712e-99
PRSS8	7.82647e-104	-0.332274	0.088	0.903	1.50613e-99
VPS26A	1.14573e-103	0.39794	0.38	0.891	2.20484e-99
HIGD1A	1.34251e-103	0.341997	0.392	0.908	2.58353e-99
SPEN	1.64462e-103	-0.418525	0.035	0.882	3.1649e-99
CETN3	1.83382e-103	0.29839	0.298	0.856	3.529e-99
PTAR1	2.38542e-103	-0.466061	0.076	0.912	4.59051e-99
TMEM11	2.42356e-103	0.250981	0.351	0.897	4.6639e-99
MED21	3.62277e-103	0.260507	0.339	0.89	6.97166e-99
UTP18	5.09613e-103	0.604922	0.515	0.904	9.807e-99
SART1	6.02554e-103	0.316862	0.31	0.873	1.15955e-98
UBL7	1.05291e-102	0.250293	0.24	0.861	2.02623e-98
XPO6	1.21464e-102	-0.32764	0.117	0.919	2.33746e-98
SERINC5	1.26516e-102	-0.473577	0.111	0.933	2.43467e-98
NUDT3	1.29497e-102	-0.262808	0.146	0.916	2.49205e-98
SETD5	1.51454e-102	-0.417918	0.17	0.951	2.91458e-98
FAM120A	1.54945e-102	-0.274867	0.076	0.878	2.98176e-98
GABPB1-AS1	1.66694e-102	-1.18999	0.123	0.957	3.20787e-98
UTP11	1.72817e-102	0.469624	0.433	0.882	3.32569e-98
HARS	2.02225e-102	0.369961	0.351	0.88	3.89161e-98
GNPTAB	2.22409e-102	-0.399181	0.041	0.884	4.28004e-98
SV2A	2.28659e-102	-0.34874	0.07	0.89	4.40031e-98
ZNHIT3	2.58723e-102	0.338255	0.474	0.925	4.97887e-98
ATP13A3	3.1973e-102	-0.383051	0.035	0.865	6.15288e-98
DSG2	3.28486e-102	-0.821505	0.146	0.963	6.32138e-98
GPC2	5.91506e-102	-0.346434	0.064	0.895	1.13829e-97
FLT1	7.54494e-102	-0.305947	0.058	0.869	1.45195e-97
TTC17	9.32089e-102	-0.358258	0.058	0.89	1.79371e-97
PTK7	9.9692e-102	-0.339325	0.099	0.91	1.91847e-97
AASS	1.02473e-101	-1.09292	0.146	0.966	1.972e-97
LAMA5	1.12351e-101	-0.401243	0.041	0.88	2.16208e-97
SCAI	1.36065e-101	-0.294629	0.047	0.869	2.61844e-97
SYT1	1.65941e-101	-0.349879	0.129	0.927	3.19336e-97
VMP1	2.0622e-101	-0.272238	0.135	0.921	3.9685e-97
RRP9	2.39649e-101	0.466508	0.368	0.85	4.6118e-97
FIRRE	2.61497e-101	-0.476448	0.053	0.895	5.03226e-97
HCFC1	2.91759e-101	-0.340872	0.158	0.933	5.61461e-97
TTC9	2.95036e-101	0.275843	0.199	0.788	5.67767e-97
TRRAP	4.0689e-101	-0.281964	0.035	0.846	7.83018e-97
GOLGA4	4.69719e-101	-0.693243	0.111	0.944	9.03927e-97
FZD7	4.97365e-101	-0.437548	0.17	0.949	9.57128e-97
ZNF431	5.74036e-101	-0.371754	0.076	0.897	1.10467e-96
MINDY2	7.2486e-101	-0.322655	0.088	0.901	1.39492e-96
CDK11B	1.51022e-100	0.265918	0.257	0.807	2.90626e-96
TPBG	2.65597e-100	-0.303471	0.07	0.886	5.11115e-96
HPRT1	2.71152e-100	0.265419	0.374	0.884	5.21806e-96
ANKLE2	3.08062e-100	-0.262848	0.117	0.908	5.92835e-96
GLDC	3.68779e-100	-0.322862	0.14	0.921	7.09677e-96
TMEM41B	4.33984e-100	-0.336801	0.117	0.918	8.35159e-96
ATXN2L	4.70018e-100	-0.525043	0.123	0.942	9.04503e-96
DSCC1	6.50651e-100	0.27181	0.363	0.882	1.25211e-95
KMT2A	6.52609e-100	-0.640682	0.158	0.955	1.25588e-95
MDM4	7.77684e-100	-0.499365	0.07	0.91	1.49658e-95
ADGRL2	7.82496e-100	-0.343329	0.064	0.89	1.50584e-95
KMT2C	1.01652e-99	-0.282949	0.047	0.85	1.9562e-95
GPATCH2L	1.05684e-99	-0.316916	0.111	0.912	2.03378e-95
USP9Y	1.06326e-99	-0.261917	0.123	0.912	2.04614e-95
POM121	1.28931e-99	-0.392974	0.064	0.897	2.48115e-95
ERAL1	1.4495e-99	0.298819	0.374	0.888	2.78941e-95
ARMT1	1.54642e-99	0.28151	0.374	0.893	2.97593e-95
AGPS	1.57377e-99	0.293105	0.304	0.875	3.02857e-95
SETD3	1.6379e-99	0.282325	0.281	0.863	3.15198e-95
TAOK1	1.7922e-99	-0.421685	0.14	0.936	3.44892e-95
LDLR	1.79528e-99	-0.439509	0.064	0.888	3.45484e-95
PCYOX1	1.82803e-99	-0.300804	0.053	0.867	3.51786e-95
NUDCD1	1.89208e-99	0.378272	0.392	0.918	3.64111e-95
TUG1	2.38817e-99	-0.41806	0.158	0.938	4.59579e-95
KMT2E	2.53271e-99	-0.250095	0.17	0.94	4.87395e-95
AKAP1	2.83365e-99	-0.414421	0.123	0.918	5.45308e-95
UBE2A	2.91246e-99	0.337157	0.351	0.876	5.60475e-95
CCNH	3.12802e-99	0.290152	0.263	0.845	6.01957e-95
PCDH1	3.8506e-99	-0.380392	0.064	0.89	7.41009e-95
EP400	4.09835e-99	-0.25956	0.14	0.912	7.88686e-95
CHML	4.2582e-99	-0.382605	0.029	0.871	8.19448e-95
SLC7A3	7.14509e-99	-0.463039	0.088	0.914	1.375e-94
TPRKB	8.56505e-99	0.254434	0.427	0.923	1.64826e-94
TRIP11	1.02353e-98	-0.343654	0.035	0.852	1.96969e-94
CRLF3	1.29e-98	0.292315	0.205	0.757	2.48247e-94
TRIM56	1.37241e-98	-0.319442	0.047	0.854	2.64107e-94
GRID2	1.47466e-98	-0.599345	0.047	0.891	2.83783e-94
SLC16A1-AS1	1.4935e-98	-0.494595	0.047	0.878	2.87409e-94
FLVCR1	1.5673e-98	-0.60458	0.099	0.933	3.0161e-94
SEC63	1.64058e-98	-0.393363	0.175	0.949	3.15713e-94
KIAA0319L	1.66235e-98	-0.365504	0.076	0.893	3.19902e-94
ZNF121	3.45359e-98	-0.288778	0.193	0.948	6.64608e-94
ADAM17	3.56673e-98	-0.271377	0.035	0.843	6.86381e-94
DAPK1	3.68973e-98	-0.304268	0.082	0.878	7.10051e-94
PHACTR4	3.70953e-98	-0.4308	0.117	0.916	7.13863e-94
FAM118B	4.67874e-98	0.281263	0.292	0.839	9.00376e-94
AIMP2	4.79235e-98	0.339717	0.398	0.912	9.22241e-94
USP39	5.29048e-98	0.345604	0.38	0.903	1.0181e-93
SMARCC2	6.39717e-98	-0.285118	0.17	0.929	1.23107e-93
TSN	7.21869e-98	0.295315	0.456	0.942	1.38916e-93
BOP1	8.66701e-98	0.656034	0.55	0.919	1.66788e-93
APIP	1.10849e-97	0.3134	0.339	0.861	2.13318e-93
PIAS2	1.20439e-97	-0.252183	0.152	0.921	2.31772e-93
INTS13	1.20585e-97	0.269709	0.357	0.912	2.32053e-93
SNHG4	1.4747e-97	-0.485124	0.099	0.916	2.83791e-93
MYCBP	1.79933e-97	0.254355	0.345	0.882	3.46262e-93
MEAF6	2.15161e-97	0.356518	0.38	0.875	4.14056e-93
SYNE2	2.2355e-97	-0.502922	0.123	0.923	4.30199e-93
ENOPH1	2.45855e-97	0.433717	0.48	0.934	4.73123e-93
PLCG2	2.86854e-97	-0.337367	0.064	0.876	5.52021e-93
ANOS1	3.58836e-97	-0.378766	0.07	0.884	6.90545e-93
GJC1	3.67221e-97	-0.37146	0.105	0.903	7.06681e-93
PLXNB1	3.71458e-97	-0.256169	0.058	0.861	7.14833e-93
FANCI	4.02643e-97	0.320542	0.304	0.869	7.74846e-93
ARL1	5.68969e-97	0.281797	0.339	0.891	1.09492e-92
COMMD10	5.8382e-97	0.330864	0.363	0.897	1.1235e-92
ITGB5	6.27148e-97	-0.44487	0.123	0.914	1.20688e-92
UTP15	6.50794e-97	0.257333	0.175	0.747	1.25239e-92
TOMM34	6.64823e-97	0.275124	0.31	0.85	1.27938e-92
SREBF2	6.68385e-97	-0.552893	0.099	0.923	1.28624e-92
C14orf119	7.32039e-97	0.476124	0.526	0.927	1.40874e-92
MED25	7.36602e-97	0.256917	0.327	0.878	1.41752e-92
GPC4	7.43734e-97	-0.568648	0.146	0.949	1.43124e-92
TBC1D1	7.88238e-97	0.289044	0.322	0.904	1.51689e-92
RANBP2	9.27818e-97	-0.447634	0.135	0.921	1.78549e-92
DHCR24	1.21853e-96	-1.00345	0.181	0.97	2.34494e-92
ASCC1	1.32612e-96	0.260618	0.228	0.751	2.55199e-92
EPHA1	2.04384e-96	-0.478139	0.099	0.912	3.93316e-92
SH3BGRL	2.35017e-96	0.300512	0.386	0.912	4.52266e-92
BAG2	2.62079e-96	0.321895	0.351	0.891	5.04344e-92
PTPRZ1	2.72213e-96	-0.5799	0.175	0.953	5.23846e-92
AKAP8L	2.88094e-96	0.263606	0.298	0.912	5.54408e-92
SLC39A10	3.02251e-96	-0.826015	0.193	0.968	5.81652e-92
THUMPD3-AS1	3.1748e-96	-0.325637	0.099	0.89	6.10958e-92
ADGRV1	3.20675e-96	-0.353545	0.082	0.895	6.17106e-92
ESYT1	3.26674e-96	-0.320971	0.076	0.876	6.28651e-92
NUP210	3.52015e-96	-0.267106	0.053	0.837	6.77417e-92
GLOD4	3.63091e-96	0.315633	0.38	0.895	6.98732e-92
TNRC6C	3.87027e-96	-0.412028	0.07	0.884	7.44795e-92
CCNC	4.03066e-96	0.364333	0.515	0.946	7.75659e-92
SLC4A7	5.09265e-96	-0.538178	0.135	0.934	9.80029e-92
GRN	6.00805e-96	-0.257772	0.152	0.908	1.15619e-91
ZNF397	6.2411e-96	-0.427256	0.094	0.908	1.20104e-91
ZIC5	7.4284e-96	-0.251048	0.076	0.854	1.42952e-91
RAB3B	7.52672e-96	-0.265019	0.181	0.938	1.44844e-91
RFC3	7.93381e-96	0.263481	0.292	0.854	1.52678e-91
LINC00685	8.56175e-96	-0.48511	0.006	0.837	1.64762e-91
MAP7	8.84526e-96	-0.253089	0.123	0.888	1.70218e-91
MIA3	8.89031e-96	-0.348014	0.058	0.878	1.71085e-91
WRAP53	9.58881e-96	0.364018	0.234	0.747	1.84527e-91
MRPL2	1.15809e-95	0.269156	0.263	0.846	2.22863e-91
WDR46	1.20016e-95	0.288642	0.368	0.884	2.30959e-91
CKAP4	1.23983e-95	-0.313929	0.187	0.933	2.38593e-91
NT5DC1	1.28685e-95	0.321989	0.392	0.888	2.47641e-91
SORT1	1.41725e-95	-0.281082	0.07	0.858	2.72735e-91
USP32	1.45527e-95	-0.29915	0.088	0.871	2.80052e-91
NUTF2	1.53365e-95	0.510945	0.602	0.953	2.95135e-91
MAD2L1	1.54535e-95	0.557602	0.538	0.936	2.97387e-91
SLC7A1	1.5862e-95	-0.425495	0.076	0.891	3.05247e-91
LRRN1	1.70105e-95	-0.493495	0.14	0.929	3.2735e-91
BTBD7	1.7414e-95	-0.28307	0.099	0.876	3.35116e-91
LAP3	2.79884e-95	0.297352	0.339	0.882	5.38608e-91
CASC15	3.13204e-95	-0.367988	0.018	0.822	6.02729e-91
BRMS1	3.20208e-95	0.256023	0.316	0.873	6.16209e-91
BLMH	3.20822e-95	0.293899	0.363	0.897	6.17391e-91
SEPHS2	3.4263e-95	0.305786	0.374	0.904	6.59356e-91
MFSD14C	4.20833e-95	-0.384808	0.053	0.882	8.09852e-91
AATF	4.28602e-95	0.352035	0.374	0.88	8.24801e-91
RARS2	4.60293e-95	0.279957	0.269	0.839	8.85788e-91
BYSL	5.91201e-95	0.290972	0.31	0.865	1.13771e-90
RAB11A	7.82936e-95	0.436066	0.585	0.955	1.50668e-90
PDZD8	8.28017e-95	-0.302414	0.058	0.869	1.59344e-90
NLGN4X	8.60406e-95	-0.481717	0.088	0.897	1.65576e-90
SLC2A1	9.02053e-95	-0.730344	0.129	0.94	1.73591e-90
PTPN4	9.33655e-95	-0.433525	0.123	0.919	1.79673e-90
OGA	9.70125e-95	-0.316935	0.199	0.938	1.86691e-90
KIF5C	1.04797e-94	0.411916	0.351	0.951	2.01671e-90
VPS72	1.06268e-94	0.357447	0.392	0.897	2.04502e-90
PLSCR1	1.10177e-94	0.254591	0.316	0.852	2.12024e-90
SLC25A37	1.11107e-94	-0.398479	0.14	0.927	2.13815e-90
ATM	1.1775e-94	-0.438314	0.082	0.906	2.26598e-90
PDS5A	1.28354e-94	-0.284437	0.164	0.91	2.47004e-90
RSRP1	1.38862e-94	-0.403526	0.058	0.871	2.67225e-90
HCG18	1.39313e-94	-0.35111	0.076	0.888	2.68094e-90
BICD1	1.82794e-94	-0.407848	0.047	0.878	3.51769e-90
C9orf78	1.87721e-94	0.369983	0.433	0.929	3.61251e-90
RERE	1.89197e-94	-0.256812	0.181	0.919	3.64091e-90
GHITM	1.94227e-94	0.313097	0.526	0.934	3.7377e-90
ANO10	1.95645e-94	-0.261811	0.064	0.861	3.76499e-90
RTCB	2.01867e-94	0.606583	0.544	0.934	3.88472e-90
CACNG8	2.04135e-94	-0.297916	0.012	0.773	3.92837e-90
DCTN6	2.15325e-94	0.296671	0.333	0.833	4.14372e-90
B4GALT5	2.32917e-94	-0.274359	0.105	0.873	4.48225e-90
FKBP10	2.92321e-94	-0.296632	0.158	0.929	5.62543e-90
RNF213	3.16788e-94	-0.293123	0.053	0.852	6.09627e-90
MRPS30	3.26703e-94	0.287767	0.392	0.903	6.28708e-90
C12orf10	4.64916e-94	0.252665	0.415	0.903	8.94684e-90
PEF1	4.77544e-94	0.27382	0.322	0.871	9.18985e-90
SEPTIN10	5.17437e-94	0.273739	0.386	0.94	9.95755e-90
STX16	5.50865e-94	-0.474758	0.064	0.891	1.06008e-89
BLVRA	5.67373e-94	0.300354	0.287	0.794	1.09185e-89
BMPR1A	6.0989e-94	-0.298974	0.135	0.904	1.17367e-89
SEMA6A	6.63193e-94	-0.751237	0.193	0.968	1.27625e-89
LRIG2	6.73855e-94	-0.254408	0.029	0.811	1.29677e-89
AGPAT4	6.85302e-94	-0.347071	0.035	0.852	1.3188e-89
RNF114	7.60146e-94	0.271538	0.421	0.919	1.46282e-89
PSMD6	8.39441e-94	0.53811	0.485	0.899	1.61542e-89
TXNDC9	8.67937e-94	0.348024	0.363	0.858	1.67026e-89
KANSL1	8.83879e-94	-0.518339	0.146	0.938	1.70094e-89
WASL	1.06691e-93	0.306124	0.298	0.886	2.05316e-89
CDCA7L	1.19876e-93	0.368396	0.468	0.929	2.3069e-89
PCNX4	1.25789e-93	-0.310183	0.053	0.854	2.42069e-89
PPID	1.36025e-93	0.343146	0.439	0.912	2.61766e-89
SCAP	1.46229e-93	-0.348884	0.111	0.903	2.81403e-89
POGZ	1.64977e-93	-0.269188	0.175	0.925	3.17481e-89
AGO1	1.77888e-93	-0.308144	0.152	0.908	3.42328e-89
KIF1C	1.88891e-93	0.367984	0.316	0.919	3.63501e-89
ZWINT	2.25196e-93	0.432822	0.427	0.906	4.33367e-89
KPNA6	2.72215e-93	-0.269963	0.211	0.936	5.2385e-89
MOB4	2.77745e-93	0.560699	0.556	0.929	5.34493e-89
RPP30	2.92736e-93	0.261424	0.404	0.91	5.63341e-89
PTPRA	3.39163e-93	-0.273888	0.175	0.921	6.52686e-89
ASXL2	3.67496e-93	-0.297876	0.082	0.876	7.07209e-89
PARL	4.72009e-93	0.267032	0.439	0.904	9.08334e-89
MAGT1	5.10512e-93	-0.305462	0.058	0.867	9.82429e-89
RAB18	7.76673e-93	0.252721	0.368	0.895	1.49463e-88
LPP	8.10151e-93	-0.377775	0.094	0.888	1.55905e-88
UBXN7	1.03644e-92	-0.250676	0.205	0.931	1.99453e-88
ZNF644	1.057e-92	-0.286475	0.17	0.921	2.03409e-88
FOXP1	1.06418e-92	-0.362126	0.082	0.891	2.0479e-88
PPP1R7	1.12186e-92	0.32161	0.404	0.89	2.1589e-88
CHEK2	1.29175e-92	0.305876	0.339	0.858	2.48584e-88
SNUPN	1.3045e-92	0.263127	0.257	0.807	2.51037e-88
TM9SF2	1.34584e-92	-0.274602	0.135	0.904	2.58993e-88
SERPING1	1.67083e-92	-0.329928	0.088	0.88	3.21535e-88
COPS8	1.67287e-92	0.318523	0.421	0.888	3.21927e-88
RB1CC1	1.76582e-92	-0.315814	0.228	0.948	3.39815e-88
UQCRC2	2.43003e-92	0.43428	0.532	0.942	4.67636e-88
PROM1	2.48713e-92	-0.325416	0.058	0.86	4.78623e-88
IREB2	3.0733e-92	-0.365889	0.17	0.931	5.91426e-88
TATDN1	3.27183e-92	0.328117	0.462	0.919	6.29632e-88
ATIC	3.32704e-92	0.629373	0.602	0.921	6.40256e-88
TTC14	3.33047e-92	-0.282596	0.041	0.841	6.40917e-88
ACACA	3.36613e-92	-0.335569	0.193	0.933	6.47779e-88
FARSB	4.00388e-92	0.363273	0.345	0.865	7.70506e-88
SUMF2	4.44336e-92	-0.383221	0.088	0.899	8.55081e-88
TSTA3	6.05763e-92	0.277813	0.374	0.89	1.16573e-87
ZFYVE21	6.15822e-92	0.338638	0.404	0.901	1.18509e-87
NOTCH1	7.92697e-92	-0.313226	0.023	0.811	1.52547e-87
NEFM	8.00801e-92	0.296242	0.257	0.822	1.54106e-87
OLA1	9.17279e-92	0.313927	0.526	0.923	1.76521e-87
AUTS2	9.33322e-92	-0.296709	0.152	0.914	1.79608e-87
MRPS9	9.80619e-92	0.580984	0.55	0.931	1.8871e-87
FAM98A	1.04124e-91	0.251765	0.345	0.897	2.00376e-87
PPIL4	1.09306e-91	0.294856	0.31	0.846	2.10348e-87
PGAP1	1.118e-91	-0.288287	0	0.803	2.15148e-87
APMAP	1.11882e-91	-0.283183	0.158	0.918	2.15306e-87
COL6A1	1.12879e-91	-0.440952	0.076	0.876	2.17225e-87
INTS6	1.20108e-91	-0.448502	0.088	0.899	2.31136e-87
PMPCB	1.25625e-91	0.30089	0.368	0.893	2.41753e-87
KIAA2013	1.31128e-91	-0.274558	0.111	0.88	2.52342e-87
CUTC	1.35422e-91	0.33959	0.322	0.822	2.60606e-87
RAB2A	1.37194e-91	0.254306	0.462	0.929	2.64017e-87
IARS2	1.62557e-91	-0.351891	0.187	0.936	3.12825e-87
RRP1	1.7163e-91	0.274082	0.368	0.884	3.30286e-87
LRRC8A	1.75172e-91	-0.267062	0.164	0.91	3.37101e-87
COPZ1	1.77263e-91	0.45584	0.439	0.903	3.41126e-87
SEC23B	1.80669e-91	0.386332	0.339	0.869	3.4768e-87
TM9SF3	2.17091e-91	-0.432759	0.199	0.949	4.1777e-87
SPTLC1	2.18028e-91	-0.363271	0.088	0.895	4.19573e-87
ASH1L	2.36408e-91	-0.307696	0.076	0.861	4.54944e-87
NSD1	2.53864e-91	-0.589787	0.187	0.955	4.88536e-87
PCCB	2.61877e-91	0.317168	0.31	0.86	5.03957e-87
BZW2	3.02614e-91	0.27548	0.439	0.921	5.8235e-87
MTHFS	3.1933e-91	0.294847	0.357	0.854	6.14519e-87
SNAP23	3.44271e-91	0.273505	0.357	0.886	6.62515e-87
ATG101	3.49448e-91	0.255602	0.357	0.886	6.72477e-87
CS	3.74152e-91	-0.299419	0.158	0.908	7.20017e-87
BCL11A	4.20529e-91	-0.489768	0.07	0.884	8.09266e-87
RPP40	4.71495e-91	0.288156	0.216	0.712	9.07344e-87
BCAS2	4.73088e-91	0.395872	0.433	0.901	9.1041e-87
SEMA4C	4.74198e-91	-0.260092	0.064	0.846	9.12547e-87
POLR3K	4.84656e-91	0.302935	0.462	0.931	9.32673e-87
TMEM259	7.32037e-91	-0.382235	0.181	0.938	1.40873e-86
PAPSS1	7.41873e-91	0.381679	0.474	0.918	1.42766e-86
ZNF91	7.92785e-91	-0.256078	0.07	0.861	1.52564e-86
ARF4	9.07911e-91	0.529218	0.573	0.942	1.74718e-86
PPIL1	9.38523e-91	0.276293	0.404	0.912	1.80609e-86
PLRG1	1.06922e-90	0.281792	0.374	0.888	2.05761e-86
DNM1	1.07617e-90	-0.294454	0.023	0.811	2.07098e-86
MTCH2	1.09817e-90	0.415122	0.544	0.929	2.11332e-86
AGO3	1.14842e-90	-0.27726	0.053	0.83	2.21002e-86
CCDC88A	1.41175e-90	-0.69873	0.17	0.951	2.71677e-86
AKT2	1.43377e-90	-0.302246	0.094	0.888	2.75915e-86
CDH2	1.51177e-90	-0.403242	0.053	0.861	2.90926e-86
F11R	1.71203e-90	-0.417379	0.199	0.948	3.29463e-86
ITPR2	1.71939e-90	-0.29286	0.053	0.837	3.30879e-86
KIAA1522	1.97961e-90	-0.331873	0.053	0.845	3.80956e-86
RIMKLB	2.05857e-90	-0.282826	0.105	0.891	3.96152e-86
NECTIN2	2.06487e-90	-0.382079	0.175	0.931	3.97363e-86
ROMO1	2.06978e-90	0.524517	0.585	0.936	3.98309e-86
EIF2S1	2.08591e-90	0.31845	0.444	0.923	4.01413e-86
THOC7	2.1195e-90	0.326236	0.433	0.927	4.07876e-86
CINP	2.31481e-90	0.380558	0.339	0.845	4.45461e-86
SNHG14	2.32293e-90	-1.67467	0.55	1	4.47025e-86
GNL2	2.38355e-90	0.457341	0.45	0.888	4.58691e-86
EXOSC4	2.50344e-90	0.26385	0.316	0.865	4.81763e-86
MICU2	2.6336e-90	0.277869	0.333	0.888	5.06811e-86
TMEM161B-AS1	2.79165e-90	-0.48823	0.076	0.888	5.37226e-86
CRNKL1	2.86066e-90	0.4172	0.287	0.788	5.50505e-86
LIMA1	3.23961e-90	-0.254805	0.111	0.876	6.2343e-86
CU638689.4	3.36745e-90	-0.281555	0.012	0.794	6.48032e-86
GPRC5B	3.41446e-90	-0.35464	0.088	0.89	6.57078e-86
HAT1	3.72611e-90	0.330357	0.409	0.906	7.17053e-86
NDUFS2	4.38178e-90	0.553688	0.474	0.899	8.43229e-86
CCDC58	4.71607e-90	0.290301	0.392	0.89	9.0756e-86
LRP8	4.8303e-90	-0.397816	0.047	0.86	9.29543e-86
RAP1B	5.00934e-90	0.298459	0.491	0.927	9.63997e-86
PTGR1	5.26249e-90	0.292399	0.339	0.852	1.01271e-85
ANKRD17	5.71693e-90	-0.260974	0.251	0.953	1.10017e-85
SRP54	5.79154e-90	0.370994	0.392	0.891	1.11452e-85
MRPL50	5.84871e-90	0.351647	0.48	0.927	1.12553e-85
LTBP4	6.25889e-90	-0.379779	0.076	0.886	1.20446e-85
GSE1	6.5768e-90	-0.255923	0.117	0.876	1.26564e-85
GSN	7.14178e-90	0.301393	0.304	0.854	1.37436e-85
LENG8	7.26216e-90	-0.346724	0.076	0.865	1.39753e-85
GNAI3	7.40134e-90	0.362534	0.462	0.923	1.42431e-85
ENPP1	7.85263e-90	-0.283417	0.041	0.824	1.51116e-85
B3GALNT2	8.53923e-90	-0.342292	0.088	0.876	1.64329e-85
TYW5	9.05982e-90	-0.304268	0.058	0.854	1.74347e-85
VDAC3	9.608e-90	0.352286	0.544	0.934	1.84896e-85
SLC38A2	1.00166e-89	-0.812318	0.222	0.972	1.92759e-85
ACTR8	1.13655e-89	0.2514	0.193	0.684	2.18718e-85
TSR3	1.16347e-89	0.413906	0.468	0.908	2.23897e-85
UNC5D	1.29684e-89	-0.273934	0.023	0.792	2.49564e-85
SLC16A1	1.42236e-89	-1.09587	0.24	0.978	2.7372e-85
GAR1	1.50778e-89	0.286118	0.351	0.884	2.90157e-85
ANKRD11	1.5647e-89	-0.700446	0.246	0.979	3.01111e-85
RNF149	1.58172e-89	-0.270377	0.018	0.816	3.04386e-85
VRK1	1.78055e-89	0.414101	0.433	0.886	3.42649e-85
EMG1	1.80048e-89	0.327191	0.439	0.908	3.46484e-85
RAB5C	1.84653e-89	0.359021	0.468	0.903	3.55347e-85
CDK10	2.0502e-89	-0.287065	0.082	0.86	3.94541e-85
EXOSC9	2.05873e-89	0.305898	0.363	0.88	3.96182e-85
PSMG2	2.12572e-89	0.364506	0.491	0.919	4.09073e-85
MRPL15	2.13647e-89	0.334913	0.462	0.904	4.11142e-85
RNF220	2.32409e-89	-0.260833	0.146	0.88	4.47249e-85
WIPF2	2.54096e-89	-0.251144	0.076	0.841	4.88983e-85
MRPS22	2.852e-89	0.260227	0.322	0.845	5.48839e-85
SYNGAP1	3.14823e-89	-0.284308	0.023	0.816	6.05845e-85
FZD2	3.26042e-89	-0.257197	0.175	0.916	6.27435e-85
GCA	3.26938e-89	0.278491	0.363	0.88	6.2916e-85
DHTKD1	3.60867e-89	-0.423587	0.135	0.914	6.94453e-85
ASH2L	3.78763e-89	0.256764	0.322	0.88	7.28892e-85
FN1	4.68902e-89	-0.431925	0.012	0.818	9.02355e-85
MMS22L	4.9979e-89	-0.294692	0.088	0.854	9.61797e-85
HSD17B4	5.34592e-89	0.564373	0.556	0.921	1.02877e-84
POLR2A	5.50919e-89	-0.455898	0.17	0.921	1.06019e-84
MAPRE1	6.14506e-89	0.319063	0.491	0.936	1.18256e-84
SDCBP	6.35952e-89	0.446777	0.491	0.925	1.22383e-84
KDR	6.43283e-89	-0.304372	0.018	0.805	1.23793e-84
TWISTNB	7.52091e-89	0.339343	0.357	0.908	1.44732e-84
NFE2L3	7.58193e-89	-0.558538	0.135	0.921	1.45907e-84
C6orf62	8.95396e-89	-0.316161	0.187	0.929	1.7231e-84
MAGOH	1.03228e-88	0.346017	0.538	0.942	1.98651e-84
PDHA1	1.04062e-88	0.502145	0.515	0.919	2.00258e-84
SLC2A3	1.07699e-88	-1.05772	0.246	0.979	2.07256e-84
IGDCC3	1.08039e-88	-0.400278	0.181	0.923	2.0791e-84
SEC31A	1.12058e-88	-0.250746	0.175	0.914	2.15644e-84
PDCD11	1.19188e-88	-0.328939	0.17	0.923	2.29366e-84
RBM6	1.23466e-88	-0.417242	0.175	0.936	2.37599e-84
CCDC14	1.47852e-88	-0.358027	0.105	0.893	2.84526e-84
FZD5	1.47937e-88	-0.326028	0.058	0.839	2.84689e-84
TTK	1.60761e-88	0.269457	0.31	0.875	3.09368e-84
ZNF281	1.6102e-88	-0.294374	0.211	0.94	3.09868e-84
ZNF141	1.61492e-88	-0.292275	0.053	0.848	3.10775e-84
NFE2L1	1.63151e-88	-0.381282	0.158	0.919	3.13968e-84
CUX1	1.68337e-88	-0.338712	0.117	0.884	3.23948e-84
TP53RK	1.74815e-88	0.333071	0.333	0.845	3.36413e-84
DHX33	1.88107e-88	-0.301266	0.205	0.933	3.61993e-84
LMAN1	1.95972e-88	-0.6683	0.193	0.957	3.77129e-84
DRG1	1.96626e-88	0.258088	0.363	0.91	3.78387e-84
NOSIP	2.32969e-88	0.277753	0.468	0.923	4.48325e-84
CMAS	2.39408e-88	0.480829	0.515	0.919	4.60718e-84
TASOR2	2.40066e-88	-0.265278	0.047	0.83	4.61983e-84
APC	2.52363e-88	-0.291042	0.029	0.816	4.85647e-84
PPA2	3.00614e-88	0.320689	0.404	0.906	5.78502e-84
LGMN	3.0084e-88	-0.355378	0.135	0.914	5.78936e-84
SPAG5	3.13135e-88	0.266404	0.292	0.865	6.02597e-84
PSMC6	3.15768e-88	0.38881	0.526	0.948	6.07663e-84
LMNB1	3.67262e-88	0.722557	0.591	0.957	7.0676e-84
EIF6	3.68851e-88	0.584451	0.591	0.923	7.09818e-84
NSFL1C	4.00501e-88	0.31651	0.386	0.897	7.70724e-84
TNRC6B	4.26792e-88	-0.3742	0.234	0.957	8.21319e-84
ADCY2	5.07319e-88	-0.351616	0.082	0.858	9.76285e-84
HACD2	5.42753e-88	-0.27084	0.058	0.841	1.04447e-83
VSNL1	6.20482e-88	0.635364	0.409	0.811	1.19405e-83
DYNC1H1	8.5367e-88	-0.740022	0.211	0.963	1.6428e-83
RAB7A	9.85886e-88	0.398073	0.485	0.929	1.89724e-83
SREBF1	1.03488e-87	-0.267603	0.053	0.841	1.99152e-83
PPP1R15B	1.1238e-87	-0.271293	0.041	0.82	2.16264e-83
APP	1.33784e-87	-0.820012	0.222	0.968	2.57453e-83
CLN8	1.38809e-87	-0.468196	0.105	0.903	2.67124e-83
PUF60	1.60201e-87	0.457881	0.567	0.936	3.08291e-83
PPAN	1.70539e-87	0.275021	0.38	0.871	3.28185e-83
FAM222B	1.94426e-87	-0.368511	0.17	0.908	3.74154e-83
REXO2	1.99029e-87	0.39318	0.556	0.949	3.83011e-83
QKI	2.17872e-87	-0.432805	0.228	0.957	4.19273e-83
TRIO	2.35896e-87	-0.295741	0.006	0.801	4.53958e-83
GDF11	2.41137e-87	-0.336054	0.053	0.841	4.64045e-83
HERC2	2.54512e-87	-0.337911	0.216	0.946	4.89783e-83
DYNC1LI1	2.56829e-87	0.319444	0.427	0.914	4.94242e-83
SF3B4	2.5793e-87	0.277776	0.427	0.908	4.96361e-83
NAMPT	2.80343e-87	0.438626	0.509	0.923	5.39492e-83
DDX11	2.95008e-87	-0.258988	0.123	0.873	5.67714e-83
DGCR8	3.33008e-87	-0.285156	0.041	0.82	6.4084e-83
FERMT2	4.26316e-87	0.261887	0.368	0.897	8.20402e-83
FZD3	4.47705e-87	-0.448787	0.164	0.927	8.61563e-83
TMEM161A	4.63026e-87	-0.294431	0.117	0.882	8.91047e-83
FAM219B	4.64304e-87	-0.342488	0.088	0.875	8.93506e-83
PRPF31	5.52168e-87	0.350718	0.45	0.916	1.06259e-82
KTN1	5.55834e-87	-0.829	0.251	0.976	1.06965e-82
ALG8	5.73773e-87	-0.310205	0.123	0.888	1.10417e-82
ACVR2B	5.79249e-87	-0.464952	0.216	0.948	1.11471e-82
SLC7A11	6.43762e-87	-0.339452	0.029	0.803	1.23886e-82
PDCD10	6.65323e-87	0.376318	0.45	0.919	1.28035e-82
LINC00599	7.01425e-87	-0.349735	0.012	0.809	1.34982e-82
TMEM165	7.06584e-87	-0.307462	0.251	0.955	1.35975e-82
MTX1	7.82013e-87	0.322561	0.415	0.897	1.50491e-82
SC5D	8.63591e-87	-0.497797	0.187	0.944	1.66189e-82
C19orf25	8.92324e-87	-0.309361	0.175	0.918	1.71719e-82
FH	9.06704e-87	0.309332	0.322	0.869	1.74486e-82
SUCLA2	9.62386e-87	0.465189	0.491	0.921	1.85202e-82
MT-ND4	1.02338e-86	-1.00556	0.632	0.993	1.96938e-82
SRP68	1.15044e-86	0.296653	0.374	0.888	2.21391e-82
IDH3B	1.39379e-86	0.306023	0.409	0.914	2.6822e-82
LPCAT4	1.40632e-86	-0.266848	0.099	0.869	2.70633e-82
PSMA1	1.71343e-86	0.404299	0.614	0.949	3.29733e-82
ACTN4	1.75186e-86	-0.263413	0.257	0.961	3.37128e-82
SNRNP40	1.76737e-86	0.465542	0.532	0.921	3.40113e-82
GSTO1	2.00785e-86	0.439729	0.491	0.906	3.8639e-82
HELLPAR	2.12954e-86	-0.285858	0.029	0.779	4.09809e-82
NIT2	2.17796e-86	0.312138	0.275	0.796	4.19127e-82
NANS	2.18588e-86	0.363241	0.439	0.899	4.20652e-82
TCEAL9	2.50983e-86	0.408622	0.444	0.919	4.82992e-82
EIF2B3	2.69367e-86	0.338117	0.292	0.798	5.18369e-82
ZNF714	2.714e-86	-0.398142	0.14	0.908	5.22282e-82
CNN3	2.7639e-86	0.33746	0.602	0.981	5.31884e-82
UFD1	2.87593e-86	0.339324	0.462	0.921	5.53445e-82
ECHDC1	2.98715e-86	0.285297	0.439	0.903	5.74848e-82
PEX26	3.8442e-86	-0.349368	0.035	0.828	7.39778e-82
DNTTIP1	3.88001e-86	0.327412	0.333	0.86	7.46669e-82
SSR1	3.96897e-86	-0.388566	0.193	0.938	7.63789e-82
AHSA1	4.01628e-86	0.542442	0.561	0.942	7.72893e-82
SHC1	4.57054e-86	-0.299	0.205	0.931	8.79556e-82
TNRC6A	4.95947e-86	-0.461321	0.228	0.957	9.54401e-82
GGA1	5.16457e-86	-0.361178	0.105	0.89	9.93869e-82
CHPF	5.17913e-86	-0.327715	0.094	0.863	9.96671e-82
HELZ	5.19465e-86	-0.320167	0.076	0.863	9.99658e-82
ELAVL1	5.29207e-86	0.34202	0.585	0.963	1.01841e-81
MTREX	5.32882e-86	0.251517	0.345	0.918	1.02548e-81
ANXA5	5.4615e-86	0.499096	0.626	0.955	1.05101e-81
SAAL1	6.08372e-86	0.417269	0.386	0.86	1.17075e-81
MRPL9	6.75779e-86	0.285847	0.462	0.91	1.30047e-81
WNK1	8.56049e-86	-0.35845	0.246	0.953	1.64738e-81
CTH	9.52473e-86	0.327699	0.228	0.747	1.83294e-81
DICER1	1.134e-85	-0.289473	0.193	0.918	2.18226e-81
CCDC25	1.22337e-85	0.322661	0.433	0.918	2.35426e-81
SARNP	1.22663e-85	0.410195	0.567	0.942	2.36053e-81
RSL24D1	1.33382e-85	0.436089	0.643	0.959	2.5668e-81
MND1	1.57017e-85	0.268588	0.433	0.919	3.02164e-81
HMGN4	1.6317e-85	0.325695	0.415	0.904	3.14004e-81
RBM42	1.7291e-85	0.37959	0.415	0.876	3.32748e-81
AAMP	1.86659e-85	0.327845	0.48	0.929	3.59206e-81
LAS1L	1.90921e-85	0.262036	0.357	0.882	3.67409e-81
ASPM	2.13835e-85	-0.590285	0.14	0.918	4.11503e-81
CTPS1	2.21187e-85	0.30976	0.427	0.921	4.25652e-81
MRPS36	2.22985e-85	0.359412	0.509	0.925	4.29112e-81
JPX	2.27219e-85	-0.480961	0.146	0.921	4.3726e-81
DLG1	2.30353e-85	-0.343245	0.146	0.906	4.43292e-81
ACTL6A	2.53828e-85	0.280236	0.386	0.904	4.88466e-81
CAPG	2.86986e-85	0.27297	0.316	0.828	5.52275e-81
MAT2A	2.92202e-85	-0.667975	0.187	0.946	5.62314e-81
FKBP1A	3.10918e-85	0.630273	0.708	0.949	5.9833e-81
CEP152	3.55179e-85	-0.252129	0.041	0.811	6.83507e-81
ZNF106	3.99125e-85	-0.286214	0.24	0.938	7.68077e-81
EPM2AIP1	4.10072e-85	-0.261849	0.018	0.794	7.89143e-81
GATAD1	4.24846e-85	-0.472883	0.175	0.929	8.17573e-81
TBRG4	4.32437e-85	0.280328	0.439	0.918	8.32182e-81
PSMC2	4.34236e-85	0.414298	0.433	0.906	8.35643e-81
GRIK5	4.51506e-85	-0.277842	0.058	0.831	8.68877e-81
KMT2B	4.555e-85	-0.278069	0.094	0.861	8.76564e-81
WDR74	4.62744e-85	0.317582	0.439	0.91	8.90505e-81
GLRX3	4.96566e-85	0.545575	0.608	0.942	9.55592e-81
EIF4A3	5.38048e-85	0.770427	0.602	0.91	1.03542e-80
MTMR9	5.57377e-85	-0.290996	0.105	0.873	1.07262e-80
RUFY3	5.94246e-85	-0.297845	0.123	0.89	1.14357e-80
EVL	6.55884e-85	-0.274952	0.129	0.869	1.26218e-80
STK24	6.88694e-85	-0.268027	0.234	0.938	1.32532e-80
PHF3	7.67911e-85	-0.278436	0.257	0.955	1.47777e-80
MT-CO2	9.66472e-85	-0.937884	0.673	1	1.85988e-80
PSMD14	9.80204e-85	0.558964	0.608	0.94	1.8863e-80
FOXN3	1.12838e-84	-0.369682	0.234	0.951	2.17145e-80
TMTC3	1.14878e-84	-0.256902	0.029	0.815	2.21072e-80
EEF1E1	1.22098e-84	0.435982	0.596	0.957	2.34966e-80
TRIP6	1.41405e-84	0.343558	0.444	0.912	2.7212e-80
ISG15	1.48258e-84	0.345004	0.304	0.807	2.85308e-80
HAUS1	1.56262e-84	0.364484	0.462	0.899	3.00711e-80
XPR1	2.25367e-84	-0.250206	0.041	0.811	4.33697e-80
SKA2	2.3965e-84	0.276982	0.503	0.959	4.61182e-80
MRPL47	2.56166e-84	0.511506	0.561	0.919	4.92966e-80
PSMD12	2.57541e-84	0.273941	0.439	0.923	4.95612e-80
KIF22	2.75364e-84	0.307575	0.439	0.921	5.2991e-80
CTSV	3.14121e-84	-0.379407	0.158	0.91	6.04494e-80
PIM3	3.23928e-84	0.370603	0.351	0.873	6.23368e-80
ATP2A2	3.32586e-84	-0.403422	0.222	0.942	6.40028e-80
RDH11	3.38799e-84	-0.586117	0.216	0.955	6.51985e-80
SAMM50	3.38838e-84	0.268746	0.404	0.891	6.52059e-80
PSMC1	3.56109e-84	0.383353	0.526	0.934	6.85297e-80
PILRB	3.80755e-84	-0.273321	0.029	0.809	7.32726e-80
MT-ATP6	3.8878e-84	-0.708879	0.684	0.998	7.48168e-80
PDCL3	3.9538e-84	0.343315	0.363	0.858	7.60868e-80
BRIX1	3.99995e-84	0.349763	0.48	0.933	7.6975e-80
SCP2	4.42452e-84	0.255425	0.368	0.89	8.51455e-80
CYP2S1	4.45615e-84	-0.461552	0.216	0.948	8.57541e-80
CCDC150	4.67562e-84	-0.318021	0.035	0.822	8.99776e-80
CARM1	5.33251e-84	-0.3962	0.181	0.918	1.02619e-79
RNF145	5.98455e-84	-0.446004	0.17	0.921	1.15167e-79
BCCIP	6.13659e-84	0.257197	0.415	0.929	1.18092e-79
ATXN2	6.37208e-84	-0.291822	0.199	0.916	1.22624e-79
MPHOSPH6	6.61214e-84	0.316546	0.339	0.863	1.27244e-79
NUP93	6.98307e-84	0.365325	0.398	0.884	1.34382e-79
COL26A1	6.98564e-84	-0.321077	0.105	0.88	1.34432e-79
SEPTIN11	7.13153e-84	0.474963	0.556	0.953	1.37239e-79
EMC1	7.9315e-84	-0.283095	0.029	0.816	1.52634e-79
MPZL1	8.42593e-84	-0.281806	0.211	0.925	1.62149e-79
FARSA	9.10469e-84	0.362294	0.456	0.916	1.75211e-79
DHPS	1.0111e-83	0.258853	0.415	0.899	1.94576e-79
KIAA1549	1.04436e-83	-0.254566	0.012	0.764	2.00977e-79
HSPA1B	1.10213e-83	0.288928	0.251	0.757	2.12093e-79
KIF23	1.11941e-83	0.339905	0.333	0.856	2.15419e-79
SPAG7	1.40727e-83	0.337606	0.52	0.929	2.70815e-79
THYN1	1.41731e-83	0.349681	0.538	0.931	2.72748e-79
SUGP2	1.53101e-83	-0.56523	0.187	0.938	2.94627e-79
ARF1	1.86662e-83	0.337563	0.596	0.966	3.59212e-79
CDC37	1.90714e-83	0.273821	0.515	0.964	3.6701e-79
JAG1	2.0507e-83	-0.298912	0.023	0.807	3.94636e-79
NDUFAF4	2.21562e-83	0.384253	0.48	0.901	4.26374e-79
EMC10	2.382e-83	-0.371188	0.211	0.942	4.58392e-79
RFC2	3.5348e-83	0.335801	0.427	0.899	6.80237e-79
TXNL1	3.74776e-83	0.365246	0.55	0.949	7.21218e-79
MAML1	4.00712e-83	-0.258319	0.07	0.835	7.71131e-79
ECI2	4.16375e-83	0.376586	0.474	0.916	8.01273e-79
RARS	4.22196e-83	0.377558	0.468	0.918	8.12475e-79
ARID1A	4.40989e-83	-0.495391	0.234	0.949	8.48639e-79
SMAD2	4.70354e-83	-0.272318	0.228	0.936	9.0515e-79
MYCBP2	4.90293e-83	-0.359082	0.152	0.899	9.43521e-79
MT-CYB	4.95282e-83	-0.906756	0.579	0.994	9.5312e-79
PSMD13	5.0723e-83	0.364892	0.468	0.918	9.76114e-79
SLC7A8	5.62084e-83	-0.510398	0.187	0.933	1.08167e-78
PIF1	6.0522e-83	-0.564349	0.146	0.908	1.16468e-78
GPX8	6.10455e-83	-0.278321	0.193	0.914	1.17476e-78
FAM50A	6.33403e-83	0.368986	0.398	0.895	1.21892e-78
COL1A2	6.45514e-83	-0.293317	0.053	0.813	1.24223e-78
SARS	6.78048e-83	0.411833	0.515	0.929	1.30484e-78
PFDN6	7.48509e-83	0.477744	0.485	0.893	1.44043e-78
ATXN10	7.50025e-83	0.669853	0.62	0.931	1.44335e-78
NUTM2A-AS1	7.75766e-83	-0.429489	0.152	0.918	1.49288e-78
EBNA1BP2	9.72703e-83	0.441098	0.52	0.933	1.87187e-78
SLC39A14	9.74982e-83	-0.373966	0.257	0.961	1.87625e-78
IMP3	1.02364e-82	0.34642	0.544	0.938	1.96989e-78
YARS	1.02872e-82	0.291917	0.55	0.959	1.97967e-78
NDC80	1.08814e-82	0.350424	0.327	0.833	2.09401e-78
GPT2	1.19882e-82	-0.266556	0.222	0.933	2.30701e-78
TMEM94	1.23779e-82	-0.259655	0	0.76	2.382e-78
YIPF6	1.25167e-82	-0.260458	0.187	0.908	2.40871e-78
PSMD4	1.27128e-82	0.58532	0.626	0.942	2.44645e-78
DDX39A	1.27229e-82	0.405164	0.462	0.904	2.44839e-78
FGD4	1.33535e-82	-0.264876	0.094	0.854	2.56975e-78
NELFE	1.60223e-82	0.325832	0.491	0.912	3.08334e-78
MRPL19	1.72275e-82	0.356138	0.474	0.914	3.31527e-78
UBE2G2	1.85349e-82	-0.320888	0.246	0.942	3.56686e-78
BMS1	1.90563e-82	0.288339	0.415	0.925	3.6672e-78
BDH2	2.14092e-82	0.295247	0.38	0.899	4.11999e-78
DNAJC17	2.23e-82	0.273266	0.234	0.712	4.29141e-78
COL9A3	2.73553e-82	-0.445059	0.146	0.904	5.26425e-78
GIT1	2.885e-82	-0.297752	0.123	0.869	5.55189e-78
SPG7	3.06423e-82	-0.401666	0.199	0.936	5.89679e-78
PPIH	3.07957e-82	0.348091	0.409	0.867	5.92633e-78
ZBTB8A	3.15721e-82	-0.267859	0.064	0.83	6.07574e-78
BLCAP	3.40864e-82	-0.280247	0.146	0.886	6.55958e-78
DOCK7	3.68015e-82	-0.287076	0.053	0.835	7.08209e-78
MIS18A	3.6994e-82	0.266399	0.468	0.919	7.11913e-78
ANKFY1	3.76729e-82	-0.276214	0.041	0.815	7.24978e-78
CTSD	3.78669e-82	-0.251433	0.281	0.949	7.28711e-78
CHMP2B	3.90199e-82	0.324365	0.439	0.897	7.50899e-78
CCNA2	3.97665e-82	0.439319	0.503	0.899	7.65267e-78
UXT	4.18926e-82	0.251833	0.427	0.897	8.0618e-78
MRPS23	4.31883e-82	0.439273	0.509	0.906	8.31116e-78
UCP2	4.51505e-82	0.330441	0.392	0.869	8.68876e-78
TSFM	4.60681e-82	0.268039	0.339	0.828	8.86534e-78
HLTF	5.07097e-82	0.285968	0.38	0.908	9.75858e-78
ZNF519	5.37803e-82	-0.261299	0.088	0.837	1.03495e-77
MRPL21	5.37914e-82	0.312257	0.433	0.919	1.03516e-77
COPS6	5.55075e-82	0.592348	0.614	0.936	1.06819e-77
SUGT1	5.94501e-82	0.263284	0.561	0.951	1.14406e-77
TTTY14	5.98349e-82	-0.343072	0.082	0.85	1.15146e-77
PSMC3	6.64499e-82	0.708014	0.632	0.925	1.27876e-77
VLDLR	6.7057e-82	-0.27697	0	0.757	1.29045e-77
GABBR1	7.43561e-82	-0.281083	0.047	0.803	1.43091e-77
SPATS2	8.25177e-82	-0.262493	0.193	0.895	1.58797e-77
TCEAL8	9.47287e-82	0.376407	0.544	0.936	1.82296e-77
HJURP	9.68007e-82	0.352702	0.322	0.801	1.86283e-77
PMF1	1.01017e-81	0.433416	0.567	0.933	1.94398e-77
UBE2N	1.04697e-81	0.552752	0.637	0.953	2.01478e-77
VPS35	1.0639e-81	0.296318	0.439	0.925	2.04737e-77
PDIA4	1.07945e-81	-0.548502	0.222	0.946	2.0773e-77
AC068587.4	1.09855e-81	-0.281061	0.082	0.845	2.11405e-77
HSD17B10	1.11833e-81	0.40648	0.491	0.895	2.15211e-77
UBE2L3	1.12566e-81	0.391387	0.643	0.957	2.16622e-77
MPHOSPH10	1.2181e-81	0.253548	0.339	0.893	2.3441e-77
ADSL	1.22985e-81	0.345843	0.556	0.94	2.36672e-77
LZTS3	1.25684e-81	-0.310014	0.035	0.813	2.41867e-77
FGFR1	1.31633e-81	-0.958707	0.287	0.979	2.53314e-77
TYMS	1.46393e-81	0.250135	0.491	0.936	2.81719e-77
ATP6V1D	1.49925e-81	0.291209	0.439	0.91	2.88516e-77
SMAD5	1.76324e-81	-0.446694	0.164	0.916	3.39318e-77
UPF3B	1.83036e-81	0.299344	0.45	0.929	3.52234e-77
CHD1	2.07692e-81	0.298638	0.363	0.919	3.99682e-77
HDGFL2	2.44871e-81	0.371048	0.544	0.946	4.71229e-77
TUBA4A	2.46803e-81	0.361422	0.374	0.869	4.74948e-77
SLC25A36	2.51364e-81	-0.427388	0.199	0.934	4.83724e-77
HUWE1	2.88157e-81	-0.457759	0.251	0.942	5.54529e-77
PPP2CA	3.11185e-81	0.258035	0.509	0.961	5.98843e-77
FAM217B	3.98504e-81	-0.270648	0.082	0.843	7.66882e-77
GMPS	4.15189e-81	0.487645	0.532	0.934	7.9899e-77
C7orf50	5.08324e-81	0.279721	0.45	0.899	9.78218e-77
VPS29	5.09457e-81	0.349215	0.427	0.873	9.80399e-77
CAPN15	5.1349e-81	-0.251315	0.123	0.856	9.88161e-77
DCAF13	5.3521e-81	0.623902	0.567	0.934	1.02996e-76
PSMC4	5.9151e-81	0.765665	0.62	0.914	1.1383e-76
MVD	8.61384e-81	0.284857	0.327	0.893	1.65765e-76
IMMT	8.64131e-81	0.386474	0.468	0.931	1.66293e-76
ALYREF	8.89656e-81	0.260998	0.462	0.912	1.71205e-76
FBLN1	9.14862e-81	-0.424165	0.257	0.948	1.76056e-76
DCTN2	1.02721e-80	0.286903	0.485	0.931	1.97676e-76
PLD3	1.03157e-80	-0.366028	0.24	0.938	1.98515e-76
DPM1	1.23184e-80	0.360139	0.398	0.897	2.37055e-76
SMARCD2	1.30452e-80	0.253911	0.421	0.919	2.51042e-76
SS18L2	1.49259e-80	0.311413	0.48	0.923	2.87234e-76
MT-CO3	1.57599e-80	-0.670796	0.661	0.993	3.03283e-76
EIF4E	1.76316e-80	0.52071	0.62	0.946	3.39302e-76
LRPAP1	1.98052e-80	-0.282416	0.158	0.886	3.81132e-76
RAB1A	2.30697e-80	0.307165	0.48	0.929	4.43954e-76
SALL2	2.32795e-80	-0.418872	0.234	0.94	4.47991e-76
PFDN4	3.10767e-80	0.36867	0.608	0.951	5.9804e-76
DNAJA1	3.21321e-80	0.780563	0.702	0.959	6.1835e-76
WSB1	3.25047e-80	-0.54531	0.24	0.953	6.25521e-76
TRAPPC1	3.28227e-80	0.289324	0.485	0.921	6.31639e-76
RMST	3.29888e-80	-0.337733	0.041	0.805	6.34836e-76
AKIRIN2	3.39714e-80	0.378287	0.485	0.918	6.53745e-76
ARL3	3.74392e-80	0.286342	0.444	0.899	7.20479e-76
MFSD3	3.77612e-80	0.318946	0.374	0.891	7.26676e-76
ZNF322	4.02024e-80	-0.484919	0.164	0.914	7.73654e-76
LINC02595	4.24747e-80	-0.256447	0	0.747	8.17383e-76
RBBP7	4.47832e-80	0.365618	0.526	0.927	8.61807e-76
CHORDC1	5.56482e-80	0.410811	0.503	0.934	1.07089e-75
CCN2	6.88205e-80	-0.302051	0.035	0.758	1.32438e-75
SELENOS	6.89523e-80	-0.379953	0.216	0.931	1.32692e-75
GMNN	6.99328e-80	0.310863	0.491	0.938	1.34579e-75
OAT	7.47822e-80	0.386774	0.48	0.923	1.43911e-75
MTDH	8.49154e-80	-0.539881	0.234	0.949	1.63411e-75
ERBB2	8.60918e-80	-0.339037	0.234	0.936	1.65675e-75
KLHL7	1.07587e-79	0.298773	0.415	0.899	2.0704e-75
AURKA	1.13002e-79	0.569092	0.409	0.884	2.17461e-75
EIF1B	1.1532e-79	0.396939	0.573	0.949	2.21922e-75
PRMT5	1.2513e-79	0.304767	0.409	0.925	2.408e-75
PPAT	1.51507e-79	0.430489	0.52	0.938	2.91561e-75
MT-ND5	1.61038e-79	-0.412932	0.322	0.983	3.09901e-75
HDHD5	1.62239e-79	0.281378	0.45	0.923	3.12213e-75
PYCR1	1.72765e-79	0.308582	0.485	0.933	3.32469e-75
EXOSC7	1.77201e-79	0.416933	0.515	0.908	3.41005e-75
PLPP3	1.78962e-79	-0.287713	0.023	0.792	3.44394e-75
DDX27	1.7943e-79	0.26489	0.427	0.908	3.45296e-75
NARF	1.94652e-79	0.324113	0.439	0.906	3.74589e-75
CLU	2.20382e-79	-0.282508	0.211	0.916	4.24103e-75
TMEM230	2.21264e-79	0.319025	0.52	0.929	4.258e-75
BTF3L4	2.47727e-79	0.265739	0.52	0.94	4.76725e-75
TMX2	2.50746e-79	-0.336997	0.193	0.914	4.82535e-75
PODXL	2.60415e-79	-1.06773	0.304	0.979	5.01142e-75
NUSAP1	3.15402e-79	0.429013	0.485	0.914	6.0696e-75
MCM6	3.4868e-79	0.340279	0.427	0.912	6.71e-75
DIDO1	3.66155e-79	-0.26865	0.187	0.895	7.04628e-75
MAP4K4	4.0037e-79	-0.35254	0.287	0.955	7.70473e-75
ZNF638	4.43404e-79	-0.379808	0.24	0.944	8.53288e-75
DYNLRB1	4.51519e-79	0.401695	0.573	0.942	8.68904e-75
ARPC4	4.75849e-79	0.349036	0.468	0.929	9.15724e-75
PSME1	5.14465e-79	0.275424	0.427	0.878	9.90035e-75
BAX	5.18432e-79	0.252985	0.55	0.957	9.97671e-75
GABARAPL2	5.30489e-79	0.266234	0.462	0.899	1.02087e-74
HOOK2	5.85293e-79	-0.500387	0.175	0.919	1.12634e-74
PLCXD1	6.13074e-79	-0.417176	0.228	0.938	1.1798e-74
GLUL	6.23489e-79	0.408725	0.573	0.951	1.19984e-74
NDUFA3	6.60752e-79	0.493613	0.608	0.951	1.27155e-74
NARS	6.80296e-79	0.410424	0.626	0.968	1.30916e-74
OLMALINC	7.39431e-79	-0.354086	0.164	0.895	1.42296e-74
DPY30	8.06029e-79	0.354254	0.561	0.944	1.55112e-74
SPARC	8.92747e-79	-0.305821	0.246	0.94	1.718e-74
TCF4	8.93401e-79	-0.264077	0.316	0.963	1.71926e-74
LINC00662	9.07672e-79	-0.503192	0.146	0.903	1.74672e-74
COX16	9.18877e-79	0.265216	0.526	0.94	1.76829e-74
NUP37	9.38914e-79	0.313783	0.392	0.876	1.80685e-74
EIF3M	1.10279e-78	0.468284	0.655	0.972	2.12221e-74
SMC2	1.1195e-78	0.303689	0.392	0.914	2.15436e-74
SUPT4H1	1.36001e-78	0.257405	0.45	0.91	2.6172e-74
NDUFS3	1.49858e-78	0.506966	0.532	0.918	2.88386e-74
EXOSC3	1.55279e-78	0.442606	0.468	0.882	2.98818e-74
PSAP	1.65086e-78	-0.658508	0.257	0.963	3.17692e-74
NORAD	1.67365e-78	-0.303222	0.287	0.953	3.22077e-74
SNHG3	1.84058e-78	-0.634571	0.263	0.963	3.54201e-74
STAT5B	1.87037e-78	-0.256696	0.088	0.839	3.59935e-74
ANKRD13D	1.88548e-78	-0.261095	0.053	0.801	3.62842e-74
NDUFS4	2.02649e-78	0.38069	0.491	0.91	3.89978e-74
STT3B	2.46036e-78	-0.405166	0.193	0.923	4.73472e-74
NSD3	2.50179e-78	-0.254781	0.257	0.938	4.81444e-74
TET1	2.60739e-78	-0.325203	0.298	0.953	5.01767e-74
UBE2V1	3.18237e-78	0.261772	0.608	0.957	6.12415e-74
TMEM126B	3.19627e-78	0.261679	0.456	0.931	6.15091e-74
UBE2V2	3.19923e-78	0.402274	0.602	0.948	6.1566e-74
SDHC	3.36579e-78	0.41198	0.567	0.949	6.47713e-74
EIF4E2	3.67356e-78	0.298413	0.526	0.929	7.0694e-74
DDX24	4.58632e-78	0.392042	0.526	0.951	8.82592e-74
UBE2T	5.2322e-78	0.391481	0.427	0.88	1.00688e-73
MRPL28	5.52348e-78	0.386318	0.485	0.921	1.06294e-73
SCAF11	6.1977e-78	-0.324799	0.292	0.953	1.19269e-73
RPA3	6.19916e-78	0.517187	0.602	0.931	1.19297e-73
CD276	9.06745e-78	-0.262342	0.199	0.91	1.74494e-73
USP22	1.09539e-77	-0.295844	0.333	0.972	2.10797e-73
ACOT13	1.47798e-77	0.32051	0.48	0.925	2.84423e-73
PSMD8	1.67561e-77	0.521863	0.632	0.946	3.22454e-73
ATP5PB	1.68694e-77	0.490215	0.661	0.963	3.24635e-73
SF3A3	1.8621e-77	0.453364	0.585	0.946	3.58343e-73
SYNGR2	2.00974e-77	-0.313023	0.088	0.848	3.86754e-73
APLP2	2.05823e-77	-0.754237	0.287	0.972	3.96087e-73
AC092490.1	2.35244e-77	0.332611	0.556	0.959	4.52703e-73
FAM83D	2.43042e-77	0.325233	0.327	0.818	4.6771e-73
RIC3	2.53028e-77	-0.283711	0.023	0.777	4.86927e-73
KRT8	2.72157e-77	0.823835	0.754	0.976	5.23739e-73
TBL1X	2.80918e-77	-0.250976	0.099	0.837	5.406e-73
HSPA5	3.51008e-77	-0.74993	0.263	0.961	6.7548e-73
CDC123	4.34952e-77	0.660032	0.643	0.944	8.37023e-73
TMED2	4.53874e-77	0.290365	0.556	0.944	8.73435e-73
SNRPD3	5.13038e-77	0.488931	0.573	0.94	9.87291e-73
NDUFA5	7.93777e-77	0.271346	0.509	0.925	1.52754e-72
TSPAN5	8.06441e-77	-0.257466	0.135	0.863	1.55191e-72
PCSK9	8.06979e-77	-0.435709	0.117	0.858	1.55295e-72
USF2	9.47471e-77	-0.28797	0.24	0.919	1.82331e-72
WDR18	1.01726e-76	0.319773	0.485	0.912	1.95762e-72
PAK1IP1	1.09955e-76	0.486986	0.462	0.906	2.11597e-72
HNRNPL	1.15326e-76	0.317025	0.474	0.931	2.21934e-72
COPRS	1.32617e-76	0.337255	0.474	0.906	2.55208e-72
PPP1CB	1.37998e-76	0.251006	0.503	0.961	2.65563e-72
LSR	1.39724e-76	-0.312858	0.275	0.936	2.68885e-72
MT-ND2	1.40851e-76	-1.06539	0.433	0.987	2.71053e-72
CASP3	1.61509e-76	0.3198	0.421	0.904	3.10809e-72
HHLA1	1.932e-76	-0.262632	0.082	0.8	3.71793e-72
APEX1	2.52395e-76	0.443641	0.719	0.968	4.85708e-72
CCNK	2.52781e-76	-0.309304	0.164	0.886	4.86452e-72
NDUFV1	2.84536e-76	0.346103	0.491	0.929	5.47561e-72
AFDN	3.65139e-76	-0.314882	0.298	0.955	7.02674e-72
TAGLN2	4.09648e-76	0.309786	0.456	0.91	7.88326e-72
CREB3L2	4.52895e-76	-0.253128	0.029	0.779	8.71552e-72
ZMYND8	4.85668e-76	-0.362981	0.327	0.97	9.34619e-72
COPB2	7.59189e-76	0.331509	0.427	0.91	1.46098e-71
CAPZA1	8.18812e-76	0.28818	0.48	0.942	1.57572e-71
MFAP1	9.48362e-76	0.437839	0.398	0.891	1.82503e-71
GTF2H2	1.00947e-75	-0.313631	0.088	0.845	1.94261e-71
TUBA1C	1.02951e-75	1.04146	0.819	0.961	1.9812e-71
IDI1	1.07793e-75	0.544626	0.526	0.923	2.07437e-71
ECHS1	1.25425e-75	0.406257	0.567	0.94	2.41367e-71
UBA2	1.29034e-75	0.29955	0.62	0.97	2.48314e-71
EXOSC8	1.50618e-75	0.323782	0.456	0.906	2.89849e-71
POLR2G	2.02849e-75	0.33716	0.48	0.912	3.90362e-71
POLR2H	2.1909e-75	0.360721	0.591	0.94	4.21618e-71
CRABP1	2.38403e-75	0.468494	0.532	0.908	4.58783e-71
PTOV1	2.58568e-75	0.257273	0.503	0.949	4.97589e-71
SEC62	3.25462e-75	-0.392776	0.287	0.951	6.26319e-71
CRMP1	3.26059e-75	0.323095	0.48	0.936	6.27469e-71
N4BP2L2	3.4194e-75	-0.497758	0.251	0.948	6.58029e-71
AKR1B1	3.55228e-75	0.358283	0.579	0.942	6.83601e-71
C12orf45	3.67967e-75	0.304832	0.474	0.923	7.08115e-71
CCNB2	3.76591e-75	0.406379	0.515	0.925	7.24713e-71
ADRM1	3.82131e-75	0.40635	0.591	0.938	7.35374e-71
MKI67	4.45907e-75	-0.404977	0.228	0.925	8.58103e-71
CCN1	4.67572e-75	-0.283621	0.047	0.772	8.99796e-71
GJA1	5.51766e-75	-1.01124	0.327	0.979	1.06182e-70
FADS2	6.7144e-75	-0.588448	0.275	0.959	1.29212e-70
TRAPPC4	7.30851e-75	0.435991	0.538	0.91	1.40645e-70
AC007218.1	8.90833e-75	-0.415919	0.088	0.831	1.71432e-70
PRRC2A	9.0616e-75	-0.389002	0.287	0.949	1.74381e-70
TCF3	1.1725e-74	-0.329817	0.327	0.966	2.25635e-70
CCND2	1.18544e-74	-0.267502	0.345	0.97	2.28127e-70
TMSB15A	1.28213e-74	0.277803	0.544	0.933	2.46733e-70
PSME2	1.39029e-74	0.473206	0.55	0.914	2.67547e-70
ADSS	2.08651e-74	0.279069	0.485	0.938	4.01528e-70
NOP58	2.57634e-74	0.317173	0.538	0.963	4.9579e-70
SNW1	2.76717e-74	0.260488	0.444	0.916	5.32514e-70
SMARCD1	3.1384e-74	-0.269456	0.275	0.927	6.03954e-70
MT-CO1	3.17504e-74	-0.647276	0.556	0.987	6.11005e-70
POLR2K	3.28149e-74	0.290307	0.52	0.923	6.31489e-70
FLNA	3.32997e-74	-0.379185	0.322	0.972	6.4082e-70
TIMM50	3.35171e-74	0.28725	0.52	0.931	6.45002e-70
SFXN5	3.57098e-74	-0.261074	0.094	0.828	6.87199e-70
ATP5F1C	3.77343e-74	0.714715	0.778	0.946	7.26158e-70
SF3B6	3.93617e-74	0.54557	0.673	0.955	7.57477e-70
DNMT3A	4.80433e-74	-0.297459	0.251	0.927	9.24545e-70
NDUFB3	5.42367e-74	0.332187	0.491	0.914	1.04373e-69
PUM3	6.86303e-74	0.333205	0.444	0.908	1.32072e-69
BAG6	1.00684e-73	0.264064	0.48	0.936	1.93757e-69
MFAP2	1.05255e-73	-0.266145	0.281	0.931	2.02552e-69
CDK1	1.08309e-73	0.662527	0.532	0.876	2.0843e-69
CDC42	1.11291e-73	0.280333	0.526	0.951	2.14169e-69
TSPAN6	1.12051e-73	-0.264355	0.257	0.927	2.1563e-69
VCL	1.22911e-73	-0.598549	0.292	0.963	2.36531e-69
MRPL27	1.27726e-73	0.324655	0.491	0.893	2.45796e-69
SF3B3	1.45859e-73	0.266569	0.485	0.949	2.80691e-69
PPT1	1.55414e-73	-0.288162	0.292	0.949	2.9908e-69
TRAPPC2L	1.59144e-73	0.307127	0.509	0.921	3.06256e-69
FABP7	1.83647e-73	0.475374	0.275	0.743	3.5341e-69
SMIM26	1.87805e-73	0.269553	0.526	0.933	3.61411e-69
COMMD4	1.90442e-73	0.303644	0.456	0.91	3.66486e-69
UNG	1.9297e-73	0.295784	0.474	0.91	3.71352e-69
TBCB	2.1671e-73	0.370041	0.585	0.938	4.17037e-69
TALDO1	2.30716e-73	0.613654	0.743	0.963	4.43991e-69
PCLAF	2.77679e-73	0.411394	0.561	0.942	5.34365e-69
ITPA	2.90368e-73	0.34229	0.462	0.91	5.58784e-69
CPT1C	3.14495e-73	-0.263205	0.053	0.798	6.05214e-69
MCM7	3.20744e-73	0.56479	0.643	0.951	6.1724e-69
HSD17B12	3.97196e-73	-0.424491	0.287	0.953	7.64363e-69
ADI1	4.03601e-73	0.257989	0.439	0.904	7.76689e-69
CACYBP	4.77863e-73	0.505887	0.661	0.966	9.196e-69
KPNA2	4.84858e-73	1.15554	0.807	0.961	9.33061e-69
LINC01089	5.7001e-73	-0.267859	0.018	0.745	1.09693e-68
XBP1	6.0458e-73	-0.36154	0.228	0.919	1.16345e-68
CHMP2A	6.34914e-73	0.281052	0.52	0.927	1.22183e-68
CLNS1A	6.87979e-73	0.376535	0.596	0.944	1.32395e-68
ECH1	6.95604e-73	0.269453	0.491	0.921	1.33862e-68
TSR1	8.36735e-73	0.282662	0.474	0.925	1.61021e-68
ZIC2	8.43338e-73	-0.325852	0.31	0.957	1.62292e-68
ITGB1	1.0153e-72	-0.595841	0.292	0.963	1.95385e-68
IK	1.04583e-72	0.298583	0.456	0.91	2.01259e-68
SPC25	1.16689e-72	0.309899	0.345	0.824	2.24556e-68
ANP32A	1.20318e-72	0.434726	0.643	0.963	2.31539e-68
IPO9	1.29645e-72	-0.263556	0.287	0.934	2.49489e-68
MRPL39	1.37809e-72	0.343175	0.38	0.826	2.65199e-68
SCAND1	1.7219e-72	0.43361	0.602	0.929	3.31362e-68
CRTAP	1.99009e-72	-0.311094	0.275	0.931	3.82973e-68
WDR43	2.01465e-72	0.286929	0.48	0.938	3.87699e-68
DNAJC8	2.05899e-72	0.520029	0.673	0.964	3.96233e-68
POLR2F	2.2698e-72	0.457893	0.69	0.953	4.368e-68
SAFB	2.45959e-72	0.385352	0.468	0.916	4.73323e-68
ATRX	2.50081e-72	-0.646427	0.327	0.974	4.81256e-68
MRPL13	4.13427e-72	0.424877	0.567	0.929	7.956e-68
DDAH2	4.26891e-72	0.271244	0.491	0.918	8.21509e-68
RAB13	5.40598e-72	1.12198	0.515	0.966	1.04033e-67
NIFK	5.48462e-72	0.277489	0.532	0.938	1.05546e-67
DCTPP1	5.56932e-72	0.315259	0.48	0.908	1.07176e-67
CMSS1	5.68807e-72	0.291107	0.491	0.933	1.09461e-67
GDI2	6.18899e-72	0.433499	0.731	0.978	1.19101e-67
NUDC	7.25012e-72	0.760203	0.766	0.961	1.39521e-67
MRPS6	7.6113e-72	0.287764	0.544	0.948	1.46472e-67
SNX3	8.6593e-72	0.259706	0.526	0.942	1.6664e-67
YWHAH	9.07613e-72	0.287857	0.626	0.97	1.74661e-67
BRK1	9.66701e-72	0.357283	0.637	0.957	1.86032e-67
CDCA7	1.07971e-71	-0.406146	0.24	0.923	2.0778e-67
RBM47	1.14475e-71	-0.356616	0.187	0.888	2.20295e-67
PSMD11	1.29865e-71	0.389812	0.62	0.955	2.49913e-67
COPE	1.35043e-71	0.58077	0.649	0.927	2.59877e-67
ARPC3	1.4793e-71	0.407372	0.667	0.955	2.84676e-67
ADH5	1.48076e-71	0.612287	0.754	0.972	2.84958e-67
CALU	1.60042e-71	-0.457626	0.316	0.963	3.07984e-67
TAF15	2.15082e-71	0.332895	0.485	0.948	4.13905e-67
S100A11	2.41945e-71	0.802711	0.673	0.936	4.65598e-67
NOC2L	2.66098e-71	0.26466	0.485	0.942	5.1208e-67
SRI	3.29746e-71	0.307129	0.567	0.961	6.34564e-67
AL117378.1	3.36673e-71	-0.441356	0.14	0.86	6.47893e-67
NOL7	3.70001e-71	0.450476	0.602	0.942	7.12029e-67
TOMM22	3.78344e-71	0.271613	0.591	0.948	7.28085e-67
ESD	4.24593e-71	0.388336	0.509	0.895	8.17086e-67
TUBB2A	4.36074e-71	0.47688	0.567	0.934	8.39181e-67
PSMA6	4.86874e-71	0.389311	0.614	0.948	9.36941e-67
SEPTIN7	4.90109e-71	0.497903	0.632	0.959	9.43165e-67
KRT19	6.34509e-71	0.558355	0.626	0.933	1.22105e-66
ELOVL5	6.849e-71	-0.323096	0.327	0.961	1.31802e-66
MT-ND3	8.30622e-71	-0.871957	0.462	0.985	1.59845e-66
ATCAY	9.13041e-71	-0.270736	0.053	0.781	1.75706e-66
IFITM3	1.10859e-70	0.290032	0.526	0.933	2.13337e-66
PDHB	1.14237e-70	0.394368	0.538	0.923	2.19839e-66
SQLE	1.2145e-70	-0.352776	0.327	0.964	2.33718e-66
HNRNPM	1.46549e-70	0.754524	0.801	0.981	2.82019e-66
CAPZB	1.61144e-70	0.447729	0.713	0.968	3.10105e-66
EIF3I	1.98826e-70	0.482938	0.678	0.957	3.8262e-66
IWS1	2.40248e-70	0.26096	0.444	0.927	4.62334e-66
NPM3	2.44627e-70	0.260622	0.532	0.942	4.7076e-66
CENPW	3.16051e-70	0.29479	0.556	0.923	6.08208e-66
SLC25A4	3.16827e-70	0.276884	0.526	0.931	6.09702e-66
ATP1A1	4.08388e-70	-0.532935	0.298	0.957	7.85901e-66
NAE1	5.01961e-70	0.396568	0.608	0.949	9.65974e-66
MRPL3	6.08057e-70	0.453317	0.655	0.949	1.17015e-65
BZW1	6.20901e-70	0.431162	0.62	0.961	1.19486e-65
PCNA	6.374e-70	0.786423	0.649	0.933	1.22661e-65
CLSPN	1.05192e-69	0.30029	0.421	0.91	2.02431e-65
GARS	1.11923e-69	0.395976	0.556	0.944	2.15385e-65
AURKB	1.29542e-69	0.435415	0.503	0.899	2.4929e-65
PSMA3	1.32912e-69	0.72288	0.719	0.946	2.55776e-65
JADE1	1.46308e-69	-0.638114	0.333	0.972	2.81555e-65
NGRN	1.83251e-69	0.301591	0.515	0.925	3.52649e-65
FSTL1	2.09853e-69	-0.652916	0.281	0.951	4.0384e-65
RNF5	2.61598e-69	0.274911	0.48	0.906	5.0342e-65
EIF3G	2.68409e-69	0.400996	0.667	0.963	5.16527e-65
NAA50	2.94637e-69	0.300239	0.491	0.953	5.67e-65
SKP1	3.0013e-69	0.69839	0.749	0.968	5.77571e-65
TCP1	3.37856e-69	0.500186	0.737	0.964	6.50171e-65
DHCR7	3.39072e-69	-0.252756	0.275	0.921	6.5251e-65
HNRNPA0	3.53981e-69	0.583033	0.754	0.972	6.812e-65
EMD	5.85825e-69	-0.378885	0.251	0.918	1.12736e-64
CELF1	5.9734e-69	-0.486387	0.363	0.979	1.14952e-64
PTCD3	6.27587e-69	-0.308353	0.287	0.933	1.20773e-64
SNRPA1	6.5888e-69	0.588494	0.667	0.94	1.26795e-64
SNRPC	7.03146e-69	0.386007	0.673	0.961	1.35313e-64
HSP90B1	7.14141e-69	-1.05351	0.363	0.976	1.37429e-64
USP9X	7.56199e-69	-0.610015	0.351	0.974	1.45523e-64
FKBP3	7.90874e-69	0.627743	0.713	0.961	1.52196e-64
SF3B5	7.92913e-69	0.286125	0.585	0.931	1.52588e-64
FXR1	8.31231e-69	0.4266	0.713	0.976	1.59962e-64
SUMO1	9.3472e-69	0.525819	0.76	0.978	1.79878e-64
NDUFA8	9.58941e-69	0.393856	0.509	0.893	1.84539e-64
AP2M1	1.11496e-68	0.448767	0.725	0.964	2.14564e-64
FKBP4	1.24859e-68	0.600137	0.754	0.972	2.40278e-64
SNRNP70	1.39245e-68	0.682408	0.69	0.944	2.67963e-64
PSMB7	1.42382e-68	0.63007	0.702	0.948	2.74e-64
NDUFA6	1.44155e-68	0.413604	0.661	0.936	2.77411e-64
STRAP	1.52513e-68	0.359333	0.737	0.981	2.93496e-64
ARGLU1	1.57488e-68	-0.51053	0.339	0.968	3.03069e-64
GPM6B	1.71655e-68	-0.253252	0.292	0.933	3.30332e-64
HSPA4	1.82326e-68	0.707937	0.749	0.972	3.50868e-64
MALAT1	2.25894e-68	-1.99901	0.444	0.989	4.34711e-64
DDX39B	2.29134e-68	0.527128	0.708	0.979	4.40946e-64
ZFP36L1	2.42483e-68	-0.712954	0.31	0.961	4.66634e-64
LSM6	3.63674e-68	0.270158	0.544	0.94	6.99854e-64
SNHG1	3.66669e-68	-0.604962	0.322	0.964	7.05619e-64
TAF1D	3.88797e-68	-0.676186	0.316	0.963	7.48202e-64
VDAC1	5.47724e-68	0.382559	0.719	0.974	1.05404e-63
SNRPB2	5.71552e-68	0.509198	0.643	0.963	1.09989e-63
STIP1	9.25768e-68	0.449209	0.632	0.949	1.78155e-63
AGO2	9.71343e-68	-0.333027	0.281	0.934	1.86925e-63
USP14	1.20622e-67	0.260442	0.52	0.949	2.32126e-63
PPP4C	1.24514e-67	0.374042	0.626	0.951	2.39615e-63
RBM8A	1.27926e-67	0.558454	0.719	0.959	2.4618e-63
RDX	1.3482e-67	-0.380447	0.345	0.959	2.59447e-63
TMED3	1.4648e-67	-0.264101	0.292	0.918	2.81885e-63
MYL12B	1.55989e-67	0.658489	0.737	0.949	3.00186e-63
FADS1	1.99544e-67	-0.588118	0.339	0.968	3.84002e-63
CAP1	5.7328e-67	0.381973	0.643	0.966	1.10322e-62
TRAP1	6.14992e-67	0.364676	0.567	0.94	1.18349e-62
MT-ND1	7.36579e-67	-0.609925	0.48	0.989	1.41747e-62
ATP5MPL	7.92134e-67	0.480309	0.678	0.966	1.52438e-62
EIF4EBP2	8.19153e-67	-0.344718	0.339	0.957	1.57638e-62
FGFBP3	1.30187e-66	-0.395085	0.327	0.957	2.50533e-62
UBC	1.40296e-66	1.16689	0.83	0.966	2.69985e-62
UQCRFS1	1.41066e-66	0.404255	0.661	0.959	2.71468e-62
SLC1A5	1.56152e-66	-0.428529	0.304	0.948	3.00499e-62
PSMD3	1.75617e-66	0.272878	0.573	0.957	3.37957e-62
RUVBL1	1.871e-66	0.305634	0.561	0.931	3.60056e-62
STAU1	2.36318e-66	0.291796	0.532	0.942	4.5477e-62
JMJD1C	2.5909e-66	-0.408314	0.327	0.953	4.98592e-62
NDUFA1	2.84331e-66	0.283294	0.567	0.953	5.47166e-62
TACC3	3.06811e-66	0.372756	0.48	0.912	5.90427e-62
IMPDH2	3.20373e-66	0.446758	0.725	0.964	6.16525e-62
SLC38A1	3.30384e-66	-0.52916	0.386	0.981	6.3579e-62
EIF3H	3.47241e-66	0.397368	0.702	0.968	6.68231e-62
PSMA5	4.52837e-66	0.591449	0.673	0.944	8.7144e-62
BTG1	5.05759e-66	-0.286719	0.298	0.929	9.73282e-62
LRRC75A	6.91386e-66	-0.2584	0.263	0.903	1.3305e-61
SPRY2	8.48986e-66	-0.282086	0.076	0.762	1.63379e-61
PLA2G12A	1.00001e-65	-0.33693	0.304	0.934	1.92443e-61
TOP1	1.02987e-65	0.583973	0.637	0.964	1.98188e-61
MORF4L2	1.24434e-65	0.323509	0.643	0.963	2.39461e-61
MSH6	1.55402e-65	0.421223	0.532	0.948	2.99055e-61
GNL3	1.63336e-65	0.390054	0.626	0.963	3.14324e-61
CCT7	1.63453e-65	0.686136	0.813	0.97	3.14549e-61
CHCHD10	1.67271e-65	0.254423	0.556	0.936	3.21896e-61
RTRAF	1.90199e-65	0.629649	0.772	0.976	3.66019e-61
CALM2	5.88311e-65	0.810524	0.865	0.987	1.13215e-60
GTPBP4	6.42221e-65	0.361066	0.515	0.925	1.23589e-60
DLGAP5	7.00873e-65	0.36325	0.503	0.942	1.34876e-60
POLR2L	7.60564e-65	0.425111	0.684	0.955	1.46363e-60
DHX15	7.78433e-65	0.338799	0.585	0.961	1.49802e-60
SEPTIN2	9.11105e-65	0.324376	0.661	0.976	1.75333e-60
MSH2	1.08128e-64	0.343229	0.544	0.951	2.08081e-60
CRABP2	1.47861e-64	0.457349	0.48	0.916	2.84544e-60
CACNA1A	1.65374e-64	-0.261984	0	0.655	3.18246e-60
BEX1	2.00727e-64	0.339165	0.544	0.931	3.86278e-60
MCM3	2.23753e-64	0.504116	0.678	0.966	4.3059e-60
CCT8	2.40162e-64	0.702182	0.807	0.968	4.62168e-60
LINC01108	2.94838e-64	-0.259554	0.047	0.708	5.67387e-60
ZSCAN10	3.04098e-64	-0.267644	0.345	0.944	5.85207e-60
SF3B2	3.84426e-64	0.436687	0.608	0.955	7.39789e-60
WAC	3.99555e-64	-0.268512	0.357	0.948	7.68904e-60
CLIC1	7.31845e-64	0.529788	0.713	0.953	1.40836e-59
MPLKIP	9.23919e-64	0.303587	0.503	0.914	1.77799e-59
ESF1	9.43046e-64	0.269567	0.444	0.929	1.8148e-59
PABPN1	1.00181e-63	-0.335879	0.398	0.979	1.92789e-59
NDUFB1	1.06857e-63	0.258062	0.614	0.959	2.05636e-59
LUC7L3	1.08889e-63	-0.518967	0.404	0.981	2.09547e-59
RHEB	1.17226e-63	0.282329	0.661	0.97	2.25589e-59
PSMB5	1.25618e-63	0.467495	0.725	0.972	2.41739e-59
CCNB1	1.29835e-63	0.79061	0.69	0.936	2.49855e-59
DNMT1	1.48575e-63	0.289872	0.567	0.953	2.85917e-59
ATP5PD	1.55797e-63	0.46448	0.684	0.961	2.99816e-59
PDIA3	1.63664e-63	-0.642786	0.345	0.963	3.14955e-59
PSMD2	1.82796e-63	0.585843	0.667	0.948	3.51773e-59
RCN1	1.83006e-63	-0.353824	0.345	0.949	3.52176e-59
JARID2	1.92062e-63	-0.431198	0.392	0.976	3.69603e-59
KDM1A	2.07914e-63	0.364679	0.632	0.968	4.00109e-59
ANP32B	3.33927e-63	0.379564	0.561	0.966	6.42609e-59
RRP1B	4.6567e-63	0.300926	0.544	0.934	8.96136e-59
TMED9	4.70379e-63	-0.308174	0.339	0.944	9.05197e-59
CSE1L	6.38158e-63	0.386805	0.602	0.961	1.22807e-58
MRPS26	8.05331e-63	0.313843	0.632	0.953	1.54978e-58
RPN2	8.81954e-63	-0.755596	0.374	0.97	1.69723e-58
TRIR	1.0125e-62	0.300024	0.637	0.963	1.94846e-58
TUBB3	1.03975e-62	0.655922	0.737	0.959	2.00089e-58
GGCT	1.27766e-62	0.261041	0.626	0.964	2.45874e-58
SNU13	1.35042e-62	0.368103	0.673	0.974	2.59875e-58
MAGED2	2.02158e-62	0.462002	0.544	0.906	3.89033e-58
YWHAQ	2.47307e-62	0.597981	0.819	0.981	4.75917e-58
HMGB3	2.80399e-62	0.469214	0.737	0.976	5.39599e-58
SNRPE	2.88761e-62	0.52862	0.778	0.972	5.55691e-58
CSNK1E	3.66456e-62	-0.633225	0.38	0.972	7.05208e-58
BUB3	5.3399e-62	0.357138	0.626	0.964	1.02761e-57
XRN2	5.38526e-62	0.31838	0.643	0.961	1.03634e-57
SOX2	5.74294e-62	-1.07829	0.433	0.974	1.10517e-57
HNRNPF	6.55608e-62	0.592326	0.795	0.979	1.26165e-57
GRAMD1A	7.86843e-62	-0.28103	0.363	0.946	1.5142e-57
PET100	1.29228e-61	0.325806	0.532	0.931	2.48686e-57
ILF2	1.83568e-61	0.619309	0.778	0.961	3.53258e-57
AUP1	2.73013e-61	-0.272766	0.345	0.927	5.25385e-57
LMO4	3.39915e-61	-0.321371	0.345	0.944	6.54132e-57
TUBB4B	3.48105e-61	0.922304	0.789	0.961	6.69894e-57
LSM3	3.8301e-61	0.47121	0.696	0.963	7.37065e-57
LARP1	4.68661e-61	-0.345299	0.421	0.979	9.01892e-57
DBN1	6.43047e-61	-0.338576	0.345	0.94	1.23748e-56
PSMC5	6.53159e-61	0.387891	0.667	0.942	1.25694e-56
C12orf57	6.81467e-61	0.284727	0.591	0.948	1.31141e-56
DDX17	7.35972e-61	-0.650832	0.456	0.991	1.41631e-56
BANF1	8.38941e-61	0.46833	0.713	0.968	1.61446e-56
PHB	1.10173e-60	0.43664	0.772	0.972	2.12017e-56
CSTB	1.12538e-60	0.262108	0.643	0.963	2.16569e-56
CDC20	1.13343e-60	0.707651	0.667	0.931	2.18117e-56
ANXA2	1.70765e-60	0.40289	0.491	0.886	3.28621e-56
CD81	2.09189e-60	-0.279575	0.345	0.948	4.02564e-56
PABPC4	2.67588e-60	0.258157	0.561	0.955	5.14946e-56
PRDX3	2.88176e-60	0.266409	0.649	0.959	5.54565e-56
DDX18	2.93044e-60	0.516065	0.667	0.961	5.63934e-56
PFDN2	3.04447e-60	0.50713	0.649	0.934	5.85877e-56
PSMB3	3.48675e-60	0.709414	0.719	0.936	6.7099e-56
PPA1	5.2046e-60	0.262651	0.655	0.966	1.00157e-55
CANX	8.17339e-60	-0.724262	0.386	0.968	1.57289e-55
MYL12A	1.07362e-59	0.554008	0.708	0.94	2.06608e-55
PNISR	1.75952e-59	-0.906487	0.444	0.979	3.38602e-55
HBD	1.78922e-59	0.590369	0.673	0.944	3.44317e-55
ERH	1.83513e-59	0.572719	0.789	0.978	3.53152e-55
EPRS	2.64081e-59	0.251118	0.52	0.946	5.08197e-55
CCT5	4.82769e-59	0.815708	0.854	0.981	9.29041e-55
HSPA9	6.07358e-59	0.33316	0.667	0.972	1.1688e-54
NDUFS8	1.13553e-58	0.348648	0.661	0.946	2.18522e-54
EIF3B	1.25699e-58	0.418665	0.673	0.972	2.41896e-54
PNRC2	1.38595e-58	0.267732	0.509	0.934	2.66713e-54
PSMD7	1.53954e-58	0.460147	0.708	0.964	2.96269e-54
UCHL1	2.05759e-58	0.639769	0.83	0.987	3.95962e-54
PAICS	2.06924e-58	0.494494	0.795	0.989	3.98204e-54
CIRBP	2.3908e-58	-0.277495	0.427	0.955	4.60085e-54
POLR3G	4.60621e-58	0.417379	0.637	0.961	8.86418e-54
MDH1	5.47649e-58	0.739026	0.754	0.961	1.0539e-53
CLTC	5.60856e-58	-0.261012	0.444	0.972	1.07931e-53
MRFAP1	6.73935e-58	0.401061	0.684	0.964	1.29692e-53
CCT6A	7.08268e-58	0.583868	0.813	0.979	1.36299e-53
CKS1B	1.14999e-57	0.550689	0.749	0.968	2.21304e-53
THRAP3	1.18647e-57	0.478983	0.655	0.951	2.28324e-53
RSL1D1	1.22708e-57	0.265215	0.608	0.955	2.36139e-53
PBX1	2.0029e-57	-0.315817	0.404	0.961	3.85439e-53
PSMA2	2.04802e-57	0.565201	0.754	0.976	3.94122e-53
HLA-C	2.67604e-57	-0.411399	0.327	0.931	5.14977e-53
CYC1	3.41899e-57	0.324084	0.649	0.948	6.5795e-53
RHOA	3.64291e-57	0.378106	0.749	0.976	7.01042e-53
KIF5B	3.72656e-57	0.400626	0.585	0.957	7.17139e-53
SMS	1.00318e-56	0.261406	0.684	0.964	1.93052e-52
XPO1	1.07279e-56	-0.319904	0.427	0.966	2.06447e-52
HDGFL3	1.32241e-56	-0.321074	0.38	0.948	2.54485e-52
PHPT1	2.0075e-56	0.387586	0.614	0.934	3.86324e-52
NEAT1	2.10507e-56	-0.258878	0	0.599	4.05101e-52
MIR205HG	2.10507e-56	-0.37507	0	0.599	4.05101e-52
ABRACL	2.91183e-56	0.515905	0.766	0.964	5.60353e-52
PDLIM1	3.12615e-56	0.374702	0.643	0.946	6.01596e-52
PSMB2	4.34305e-56	0.498064	0.696	0.94	8.35777e-52
GSPT1	5.09688e-56	0.309832	0.655	0.957	9.80844e-52
EIF4A2	6.9808e-56	0.512873	0.778	0.981	1.34338e-51
PSMA4	8.24698e-56	0.456506	0.725	0.972	1.58705e-51
NDUFB7	8.57262e-56	0.327762	0.678	0.948	1.64972e-51
VCP	2.59126e-55	0.58244	0.749	0.968	4.98662e-51
ARL2	2.90577e-55	0.354929	0.661	0.946	5.59187e-51
MRPS34	3.34447e-55	0.350409	0.713	0.972	6.43609e-51
HACD3	3.54744e-55	-0.400866	0.415	0.961	6.82668e-51
HLA-A	6.22581e-55	-0.340318	0.433	0.964	1.19809e-50
VDAC2	7.9138e-55	0.316921	0.725	0.974	1.52293e-50
PSAT1	7.98333e-55	0.599834	0.725	0.966	1.53631e-50
IRX2	9.02444e-55	-0.271013	0.07	0.684	1.73666e-50
CDK2AP1	1.17677e-54	-0.5019	0.374	0.949	2.26458e-50
RBX1	1.26764e-54	0.407099	0.702	0.961	2.43944e-50
SMC3	1.37101e-54	0.539313	0.673	0.957	2.63837e-50
CENPF	2.82581e-54	-0.257279	0.433	0.966	5.43798e-50
AC009446.1	4.02781e-54	-0.514175	0.38	0.949	7.75111e-50
MRPL34	6.05551e-54	0.257829	0.585	0.929	1.16532e-49
PRMT1	7.62767e-54	0.59586	0.825	0.981	1.46787e-49
TARS	7.99389e-54	0.294522	0.649	0.978	1.53834e-49
MDH2	1.12301e-53	0.354051	0.743	0.978	2.16113e-49
SCD	1.19376e-53	-0.732373	0.491	0.985	2.29728e-49
MFGE8	1.6174e-53	-0.982727	0.602	0.991	3.11252e-49
RTF1	3.41623e-53	0.40588	0.661	0.949	6.5742e-49
MRPS21	3.56689e-53	0.29194	0.719	0.976	6.86412e-49
TUBA1A	4.30702e-53	0.765452	0.766	0.963	8.28843e-49
KDM5B	4.56212e-53	-0.402883	0.427	0.963	8.77934e-49
CYCS	6.13682e-53	0.682903	0.83	0.981	1.18097e-48
SLC3A2	6.26919e-53	-0.652406	0.351	0.934	1.20644e-48
CCT3	7.03101e-53	0.629398	0.836	0.987	1.35305e-48
SRP9	1.00593e-52	0.537796	0.819	0.978	1.93581e-48
NDUFV2	1.10586e-52	0.264051	0.678	0.959	2.12813e-48
SRRM2	1.13885e-52	-0.578637	0.567	0.998	2.1916e-48
CHD4	1.29591e-52	-0.404554	0.415	0.959	2.49385e-48
SSBP1	1.72659e-52	0.608333	0.784	0.97	3.32265e-48
MORF4L1	1.857e-52	0.604849	0.836	0.981	3.57362e-48
MYL9	2.33971e-52	0.418317	0.561	0.923	4.50253e-48
CLTA	6.62033e-52	0.435186	0.778	0.968	1.27402e-47
HNRNPR	7.80829e-52	0.309145	0.661	0.974	1.50263e-47
DDX5	1.21095e-51	0.337952	0.708	0.981	2.33034e-47
CCT2	2.6198e-51	0.442179	0.772	0.974	5.04155e-47
SUPT16H	3.38492e-51	0.441818	0.725	0.974	6.51394e-47
EDF1	4.3002e-51	0.317375	0.725	0.966	8.27531e-47
SERPINH1	6.7013e-51	-0.625606	0.485	0.979	1.2896e-46
SNHG7	7.90959e-51	-0.291291	0.415	0.948	1.52212e-46
NDUFAB1	9.8018e-51	0.347305	0.731	0.974	1.88626e-46
OIP5-AS1	1.51416e-50	-0.501282	0.485	0.979	2.91384e-46
DUT	1.60182e-50	0.400172	0.696	0.963	3.08254e-46
C11orf58	1.62012e-50	0.313651	0.743	0.976	3.11776e-46
NDUFB11	1.7533e-50	0.29304	0.684	0.953	3.37405e-46
FABP5	3.62475e-50	0.714722	0.778	0.963	6.97547e-46
S100A10	4.87134e-50	0.380091	0.608	0.934	9.3744e-46
PGK1	5.00227e-50	0.592114	0.789	0.976	9.62636e-46
COX7B	5.60897e-50	0.339588	0.684	0.949	1.07939e-45
TUBA1B	6.12067e-50	1.02389	0.982	0.998	1.17786e-45
NDUFB10	6.22134e-50	0.424551	0.725	0.978	1.19723e-45
FDPS	1.16046e-49	0.574522	0.737	0.961	2.23318e-45
NME1	1.41712e-49	0.587646	0.766	0.953	2.72711e-45
EIF5A	1.78639e-49	0.605874	0.86	0.987	3.43772e-45
PHGDH	1.81147e-49	0.651658	0.865	0.989	3.48599e-45
TXNDC17	2.10223e-49	0.454747	0.731	0.972	4.04554e-45
CSRP2	2.10677e-49	0.495169	0.696	0.948	4.05427e-45
SRSF9	2.60363e-49	0.474601	0.819	0.979	5.01042e-45
AP2S1	2.76101e-49	0.309689	0.713	0.961	5.31328e-45
IDH1	3.01084e-49	0.32014	0.655	0.959	5.79406e-45
C1QBP	5.50009e-49	0.590699	0.813	0.978	1.05844e-44
SNHG8	5.89427e-49	-0.270557	0.503	0.972	1.13429e-44
SF3B1	5.93473e-49	0.258412	0.62	0.968	1.14208e-44
DAD1	6.81119e-49	0.268496	0.573	0.933	1.31075e-44
CNOT7	7.67943e-49	-0.2843	0.433	0.94	1.47783e-44
ATP5MF	9.46443e-49	0.503568	0.789	0.972	1.82134e-44
ACAT2	1.08508e-48	0.588273	0.661	0.944	2.08812e-44
GABARAP	1.08982e-48	0.357038	0.719	0.955	2.09725e-44
ATP5PF	2.35926e-48	0.344536	0.725	0.957	4.54017e-44
ATP5MC1	2.72041e-48	0.304605	0.69	0.964	5.23516e-44
ATP5MG	3.73938e-48	0.469703	0.865	0.979	7.19606e-44
ANP32E	5.21466e-48	0.544715	0.778	0.978	1.00351e-43
SNRPF	5.54986e-48	0.635604	0.877	0.979	1.06802e-43
SOD1	5.82425e-48	0.488222	0.754	0.961	1.12082e-43
MICOS10	9.99111e-48	0.258498	0.678	0.953	1.92269e-43
HNRNPH3	1.09552e-47	0.363679	0.737	0.979	2.10822e-43
LARS	1.17226e-47	0.316777	0.678	0.966	2.25591e-43
ATP5PO	5.08876e-47	0.398713	0.749	0.963	9.79281e-43
FOXD3-AS1	6.04918e-47	0.34126	0.626	0.921	1.1641e-42
PTTG1	6.51863e-47	0.466109	0.696	0.944	1.25444e-42
UBE2C	7.79734e-47	0.61868	0.649	0.933	1.50052e-42
SSB	9.43369e-47	0.754076	0.842	0.97	1.81542e-42
FDFT1	1.41589e-46	0.440088	0.696	0.97	2.72474e-42
PSMB4	1.74703e-46	0.262208	0.661	0.949	3.36199e-42
PSMB6	2.71411e-46	0.528224	0.749	0.961	5.22302e-42
COX6B1	4.11948e-46	0.424386	0.795	0.978	7.92753e-42
SAP18	4.5911e-46	0.44313	0.743	0.964	8.83511e-42
CKS2	5.38656e-46	0.619483	0.749	0.961	1.03659e-41
NOP53	7.86607e-46	0.267461	0.673	0.955	1.51375e-41
LINC02582	1.40161e-45	-0.28832	0.251	0.816	2.69727e-41
ATP5F1A	1.40183e-45	0.43432	0.801	0.979	2.69768e-41
STMN1	2.56568e-45	0.698505	0.895	0.993	4.93739e-41
TAGLN	4.27087e-45	0.40429	0.474	0.895	8.21886e-41
ST13	5.65997e-45	0.271337	0.772	0.981	1.0892e-40
HSBP1	7.6432e-45	0.318983	0.766	0.974	1.47086e-40
ATP5F1B	1.01704e-44	0.598919	0.889	0.985	1.95718e-40
PTGES3	1.05243e-44	0.569599	0.889	0.991	2.02529e-40
PSMB1	1.05663e-44	0.649147	0.819	0.963	2.03338e-40
PRDX1	1.10521e-44	1.01924	0.977	0.994	2.12686e-40
CCT4	1.25629e-44	0.457128	0.801	0.968	2.41761e-40
XRCC5	1.48445e-44	0.628623	0.86	0.985	2.85668e-40
TCEA1	2.02262e-44	0.282728	0.702	0.974	3.89233e-40
HMGB2	6.64315e-44	0.560068	0.76	0.978	1.27841e-39
HNRNPK	9.68908e-44	0.456359	0.842	0.981	1.86457e-39
EIF3K	1.17313e-43	0.500923	0.819	0.974	2.25758e-39
SRSF7	3.59423e-43	0.412452	0.743	0.985	6.91673e-39
CALM1	4.70166e-43	0.494314	0.836	0.991	9.04787e-39
PRPF40A	5.9295e-43	0.257354	0.731	0.976	1.14107e-38
AL591742.2	6.70193e-43	-0.374855	0.07	0.631	1.28972e-38
PNN	8.93043e-43	-0.534484	0.556	0.983	1.71857e-38
JPT1	1.07733e-42	0.353357	0.76	0.972	2.07321e-38
SUB1	1.0995e-42	0.48603	0.825	0.976	2.11588e-38
PHC1	1.47502e-42	-0.383759	0.614	0.996	2.83852e-38
HELLS	1.5731e-42	-0.319255	0.591	0.991	3.02727e-38
SEC61G	1.95765e-42	0.373801	0.743	0.966	3.7673e-38
COX6C	2.98057e-42	0.432179	0.76	0.966	5.73581e-38
TRMT112	3.04257e-42	0.39477	0.784	0.974	5.85511e-38
LSM4	5.49904e-42	0.27252	0.778	0.983	1.05824e-37
TMBIM6	6.44212e-42	-0.463545	0.556	0.981	1.23972e-37
SNRPG	6.81899e-42	0.389107	0.819	0.985	1.31225e-37
SRSF3	1.03449e-41	0.568595	0.825	0.987	1.99077e-37
XRCC6	1.41215e-41	0.364557	0.772	0.978	2.71754e-37
PSMD1	2.05407e-41	0.326112	0.626	0.934	3.95285e-37
NR6A1	2.56103e-41	-0.289596	0.538	0.974	4.92844e-37
NASP	2.90853e-41	0.878602	0.936	0.993	5.59718e-37
SNRPD1	3.06385e-41	0.560871	0.848	0.976	5.89607e-37
MRPL51	3.61089e-41	0.35626	0.766	0.963	6.94879e-37
MAP1B	3.96818e-41	0.287035	0.69	0.983	7.63636e-37
POMP	4.57001e-41	0.596785	0.807	0.955	8.79453e-37
CSDE1	4.82599e-41	0.30056	0.772	0.987	9.28713e-37
GADD45GIP1	5.64508e-41	0.461662	0.784	0.953	1.08634e-36
RPL22L1	8.18001e-41	0.259659	0.678	0.976	1.57416e-36
NDUFC2	1.69869e-40	0.325458	0.708	0.961	3.26896e-36
EIF4A1	1.84498e-40	0.917403	0.982	0.996	3.55047e-36
PA2G4	2.11256e-40	0.332613	0.749	0.972	4.06541e-36
CTSC	2.169e-40	-0.439985	0.509	0.963	4.17402e-36
PARK7	3.90246e-40	0.459727	0.819	0.974	7.5099e-36
EIF3E	5.30625e-40	0.439353	0.819	0.979	1.02113e-35
ATP5IF1	1.14335e-39	0.415075	0.778	0.966	2.20026e-35
CALR	1.25795e-39	-0.520059	0.614	0.989	2.42081e-35
HSP90AB1	1.48167e-39	0.813482	0.982	0.998	2.85132e-35
YWHAE	1.94564e-39	0.439403	0.877	0.989	3.7442e-35
TXN	2.32559e-39	0.287672	0.772	0.978	4.47537e-35
ENO1	2.53541e-39	0.714296	0.918	0.991	4.87915e-35
TUBB2B	3.01238e-39	0.626774	0.918	0.987	5.79702e-35
LDHA	3.66959e-39	0.585927	0.819	0.983	7.06177e-35
PDIA6	5.69676e-39	-0.434156	0.585	0.983	1.09628e-34
UQCRB	3.38886e-38	0.353331	0.819	0.983	6.52153e-34
UBB	4.71069e-38	0.6081	0.889	0.987	9.06525e-34
ENY2	5.94853e-38	0.276608	0.731	0.955	1.14474e-33
PRDX2	7.68185e-38	0.570835	0.819	0.97	1.4783e-33
PRKDC	9.54951e-38	-0.270477	0.596	0.983	1.83771e-33
RAC1	1.3207e-37	0.308366	0.801	0.979	2.54155e-33
RTN4	1.84607e-37	-0.538481	0.614	0.978	3.55257e-33
EIF4B	6.92183e-37	0.35001	0.801	0.985	1.33204e-32
ATP5MD	8.72555e-37	0.27481	0.778	0.968	1.67914e-32
SRP14	9.49657e-37	0.567411	0.871	0.987	1.82752e-32
PRDX5	1.41545e-36	0.337531	0.807	0.968	2.72389e-32
LDHB	1.91329e-36	0.798901	0.965	0.994	3.68194e-32
NCL	4.17521e-36	0.856423	0.947	0.991	8.03478e-32
TOP2A	4.59908e-36	0.369364	0.632	0.953	8.85048e-32
SLC25A5	5.13053e-36	0.357293	0.819	0.978	9.8732e-32
EIF2S2	2.22255e-35	0.263056	0.784	0.987	4.27708e-31
NOP56	4.22843e-35	-0.261091	0.602	0.979	8.13718e-31
BSG	5.41579e-35	-0.404717	0.643	0.985	1.04221e-30
MYL6	3.96381e-34	0.595258	0.912	0.998	7.62796e-30
DDX21	7.18632e-34	0.388078	0.766	0.978	1.38294e-29
HDAC2	8.07739e-34	0.273414	0.754	0.976	1.55441e-29
UBL5	8.83944e-34	0.293144	0.813	0.978	1.70106e-29
UGP2	1.67879e-33	0.250526	0.754	0.987	3.23067e-29
SEC11A	2.61073e-33	-0.314272	0.614	0.976	5.02409e-29
TKT	2.73462e-33	0.565049	0.924	0.991	5.26251e-29
TPI1	7.20348e-33	0.472767	0.883	0.991	1.38624e-28
SLIRP	7.82831e-33	0.531331	0.83	0.959	1.50648e-28
NPM1	1.49366e-32	0.748729	0.994	0.998	2.87439e-28
CFL1	1.59588e-32	0.64789	0.959	0.993	3.07111e-28
KPNB1	2.40742e-32	-0.343875	0.69	0.994	4.63284e-28
HNRNPD	3.49359e-32	0.296524	0.819	0.989	6.72306e-28
PRRC2C	4.26397e-32	-0.264725	0.602	0.972	8.20558e-28
YWHAB	4.62415e-32	0.288574	0.83	0.993	8.89871e-28
PSIP1	8.92802e-32	0.50191	0.889	0.994	1.71811e-27
ATP5MC3	1.44372e-31	0.448004	0.836	0.97	2.77829e-27
PFDN5	1.78707e-31	0.281053	0.807	0.974	3.43904e-27
APRT	2.72498e-31	0.502401	0.865	0.972	5.24394e-27
EPCAM	2.81825e-31	-0.311394	0.591	0.964	5.42344e-27
PGAM1	9.07365e-31	0.296377	0.83	0.979	1.74613e-26
CKB	2.39582e-30	0.318594	0.795	0.978	4.61051e-26
HNRNPA2B1	3.38314e-30	0.582987	0.936	1	6.51051e-26
TRIM28	5.52235e-30	0.490743	0.749	0.983	1.06272e-25
HNRNPA3	5.63465e-30	0.496065	0.86	0.991	1.08433e-25
SNRPB	7.58296e-30	0.45672	0.86	0.979	1.45927e-25
PARP1	1.33592e-29	0.359953	0.784	0.972	2.57084e-25
SFRP1	1.62823e-29	-0.681729	0.749	0.987	3.13336e-25
COX5B	6.67581e-29	0.416343	0.795	0.955	1.28469e-24
PCBP2	8.22112e-29	-0.510047	0.713	0.979	1.58207e-24
YWHAZ	9.13368e-29	-0.434405	0.661	0.974	1.75768e-24
NDUFS6	9.78312e-29	0.467449	0.854	0.959	1.88266e-24
PKM	1.62861e-28	0.503309	0.848	0.981	3.13409e-24
PTMS	2.2171e-28	0.403006	0.836	0.978	4.26659e-24
DBI	2.44666e-28	0.319764	0.789	0.963	4.70834e-24
PPIA	2.47362e-28	0.628154	0.982	1	4.76024e-24
MARCKSL1	2.83595e-28	0.471914	0.895	0.989	5.4575e-24
RPS26	1.15924e-27	0.545369	0.901	0.991	2.23084e-23
HSPE1	4.98035e-27	0.558591	0.942	0.993	9.58418e-23
HSP90AA1	5.36016e-27	0.799862	0.988	1	1.03151e-22
NDUFS5	5.98286e-27	0.504446	0.865	0.968	1.15134e-22
DNMT3B	7.29236e-27	-0.252724	0.69	0.985	1.40334e-22
HNRNPA1	7.96016e-27	0.479915	0.953	1	1.53185e-22
PRDX6	1.43887e-26	0.52116	0.901	0.983	2.76897e-22
DYNLL1	3.55616e-26	0.331802	0.813	0.979	6.84347e-22
ZFAS1	8.37638e-26	-0.438291	0.754	0.993	1.61195e-21
SLC25A3	1.5311e-24	0.380515	0.901	0.987	2.94645e-20
NDUFA13	3.89556e-24	0.28939	0.819	0.976	7.49662e-20
ESRG	5.54367e-24	-0.492919	0.778	0.993	1.06682e-19
BTF3	1.97363e-23	0.30164	0.842	0.989	3.79806e-19
RAN	2.00581e-22	0.654464	0.977	0.987	3.85997e-18
GSTP1	2.40653e-22	0.588487	0.977	0.998	4.63113e-18
DANCR	3.17827e-22	-0.281237	0.772	0.994	6.11627e-18
NPTX1	8.25888e-22	-0.521259	0.012	0.328	1.58934e-17
HSPD1	8.37849e-22	0.558911	0.959	0.996	1.61236e-17
H3F3B	9.97761e-22	0.298104	0.889	0.991	1.92009e-17
TUBB	4.22533e-21	0.564857	0.982	0.996	8.13123e-17
RPL38	1.05539e-20	0.431908	0.947	0.994	2.03099e-16
KRT18	1.72733e-20	0.617014	0.906	0.978	3.32408e-16
TERF1	1.76849e-20	-0.362723	0.895	0.994	3.40328e-16
RANBP1	3.46209e-20	0.317505	0.883	0.981	6.66244e-16
HSPA8	2.92118e-18	0.467745	0.924	0.991	5.62151e-14
SUMO2	5.39547e-18	0.36322	0.918	0.993	1.0383e-13
SERBP1	8.56341e-18	0.382511	0.947	0.996	1.64794e-13
HMGB1	3.69508e-17	0.544509	0.988	0.996	7.11082e-13
RPS21	1.17117e-15	-0.271901	0.953	0.998	2.2538e-11
ACTG1	6.67707e-15	0.553051	0.988	0.996	1.28494e-10
H2AFZ	1.85821e-14	0.41941	0.953	0.993	3.57593e-10
NDUFA4	2.30701e-14	0.287533	0.912	0.981	4.43961e-10
POU5F1	2.95027e-14	0.44497	0.965	0.996	5.67751e-10
ACTB	3.85861e-14	0.421826	0.988	1	7.42552e-10
APOE	6.76744e-14	-0.273632	0.819	0.983	1.30233e-09
PFN1	1.67208e-13	0.334468	0.959	1	3.21775e-09
FTL	9.38374e-13	-0.331464	0.965	0.998	1.80581e-08
TMSB4X	1.5254e-12	0.432439	0.971	0.993	2.93548e-08
RPL27	3.69686e-12	0.336055	0.965	0.996	7.11423e-08
UBE2S	4.97672e-12	0.271015	0.883	0.983	9.5772e-08
RPL35	5.93638e-12	0.422458	0.994	0.998	1.1424e-07
FTH1	6.75412e-12	-0.292996	0.924	1	1.29976e-07
RPS12	1.51633e-11	-0.42344	0.994	1	2.91802e-07
UBA52	2.97507e-11	0.302318	0.942	0.991	5.72522e-07
PTMA	1.25402e-10	0.322949	1	1	2.41323e-06
GAPDH	2.3393e-09	0.376809	0.994	1	4.50176e-05
RPL12	4.62297e-08	-0.254115	1	1	0.000889644
RPL3	1.14397e-06	0.273312	0.988	1	0.0220145
H3F3A	1.15423e-06	0.290865	0.982	0.996	0.022212
HMGA1	8.64364e-06	0.263827	0.982	1	0.166338

## Sheet: iPS.merge.MAST.2
	p_val	avg_log2FC	pct.1	pct.2	p_val_adj
THY1	3.67474e-79	-1.14998	0.877	0.841	7.07168e-75
USP9X	1.84185e-75	1.14376	0.986	0.783	3.54446e-71
IRX2	7.0939e-71	1.02351	0.913	0.443	1.36515e-66
SOX2	1.10186e-70	1.13204	0.993	0.806	2.12043e-66
KRT18	8.87189e-66	-1.31961	0.971	0.958	1.70731e-61
AL591742.2	1.94073e-63	0.967912	0.862	0.406	3.73474e-59
C5orf38	1.38814e-54	0.291376	0.754	0.123	2.67133e-50
ODC1	1.03643e-53	-0.874248	0.92	0.85	1.99451e-49
LIMCH1	3.34537e-49	0.459722	0.87	0.342	6.43782e-45
TMEM64	5.43343e-49	0.55705	0.87	0.494	1.04561e-44
DUSP6	8.96755e-45	-1.18568	0.174	0.728	1.72572e-40
ETV4	5.20918e-44	-0.712022	0.652	0.781	1.00245e-39
AUTS2	5.73651e-44	0.655037	0.964	0.672	1.10393e-39
SOX4	1.08475e-42	-0.759786	0.993	0.894	2.0875e-38
MFGE8	1.13518e-42	0.98763	0.993	0.873	2.18454e-38
NFE2L3	5.34531e-41	-0.524059	0.833	0.705	1.02865e-36
OTX2	1.14245e-40	0.611255	0.891	0.494	2.19852e-36
SFRP2	3.92713e-40	-0.747208	0.957	0.903	7.55737e-36
CCDC85B	6.15198e-39	-0.606685	0.906	0.85	1.18389e-34
IDO1	2.28047e-38	0.378162	0.899	0.376	4.38854e-34
GJA1	6.32723e-37	0.864911	0.978	0.783	1.21761e-32
FGFR3	8.82194e-37	0.283841	0.746	0.328	1.69769e-32
P3H2	8.97142e-37	0.404616	0.87	0.407	1.72646e-32
FGFR1	1.42595e-36	0.771916	0.986	0.769	2.7441e-32
COL6A1	3.97144e-35	0.533443	0.957	0.616	7.64264e-31
PODXL	5.0503e-35	0.878717	0.986	0.774	9.7188e-31
RPL22L1	9.27564e-35	-0.79942	0.957	0.891	1.785e-30
ABCA1	2.17937e-34	0.251121	0.703	0.265	4.19399e-30
SRM	2.56893e-34	-0.508479	0.949	0.88	4.94365e-30
PCDH18	9.99033e-34	0.511497	0.87	0.466	1.92254e-29
POLR3G	1.03528e-33	-0.745563	0.92	0.873	1.99229e-29
DRD4	2.24766e-33	0.30235	0.739	0.279	4.3254e-29
SESN3	2.29004e-33	0.444287	0.928	0.584	4.40696e-29
CACHD1	3.16714e-33	0.384992	0.913	0.57	6.09484e-29
DHRS3	3.52216e-33	0.366717	0.855	0.444	6.77805e-29
FOXD3-AS1	2.04648e-32	-0.594037	0.884	0.841	3.93824e-28
LRRN1	2.26054e-32	0.610331	0.949	0.686	4.35018e-28
H2AFY	4.3699e-32	-0.419334	0.913	0.794	8.40943e-28
OCIAD2	4.64661e-32	-0.398946	0.92	0.804	8.94194e-28
NPTX1	1.21232e-31	1.25157	0.594	0.168	2.33299e-27
SEPHS1	1.28378e-31	-0.671999	0.964	0.905	2.4705e-27
SFRP1	1.73826e-31	0.774427	0.978	0.917	3.34511e-27
FSCN1	5.40072e-31	-0.496232	0.957	0.845	1.03931e-26
FILIP1	7.99225e-31	0.363044	0.841	0.388	1.53803e-26
SERPINB9	1.00107e-30	0.538556	0.775	0.31	1.92645e-26
TOMM5	1.81247e-30	-0.500843	0.957	0.875	3.48791e-26
OLFML3	4.40082e-30	0.494408	0.891	0.603	8.46894e-26
UGP2	3.00656e-29	0.745298	0.986	0.917	5.78582e-25
LAMA5	3.34895e-29	0.403133	0.935	0.614	6.44473e-25
AK4	5.11599e-29	-0.740444	0.696	0.776	9.84521e-25
SPRY4	6.24545e-29	-0.629413	0.225	0.677	1.20188e-24
FABP5	7.07349e-29	-0.811792	0.971	0.905	1.36122e-24
PPP1R3B	8.46928e-29	0.306723	0.841	0.457	1.62983e-24
FST	8.68545e-29	0.404515	0.87	0.466	1.67143e-24
GPC4	1.16874e-28	0.603081	0.964	0.704	2.24913e-24
DCUN1D5	1.76194e-28	-0.447753	0.935	0.84	3.39067e-24
CBR1	3.39902e-28	-0.514544	0.855	0.774	6.54108e-24
BOLA3	3.40384e-28	-0.515271	0.899	0.813	6.55034e-24
KCNK12	3.60879e-28	0.398613	0.848	0.473	6.94476e-24
SERPINH1	3.68644e-28	-0.353485	0.978	0.831	7.09419e-24
AC007326.5	4.64431e-28	0.292077	0.717	0.249	8.93752e-24
FRAT2	5.25341e-28	0.534601	0.957	0.711	1.01097e-23
RPS26	5.29473e-28	-0.711462	0.993	0.963	1.01892e-23
FGFR2	6.61053e-28	0.445593	0.935	0.601	1.27213e-23
TOMM6	1.73165e-27	-0.382892	0.971	0.88	3.33239e-23
GNPTAB	1.77434e-27	0.386932	0.935	0.617	3.41454e-23
AC009446.1	2.70012e-27	0.677574	0.964	0.774	5.19611e-23
KRT8	2.88267e-27	-0.728326	0.978	0.908	5.54741e-23
ID4	6.93175e-27	0.298652	0.739	0.287	1.33395e-22
ZIC3	1.01429e-26	0.37696	0.87	0.51	1.9519e-22
LRIG1	1.70302e-26	0.453431	0.964	0.646	3.27729e-22
NME1	2.89717e-26	-0.743055	0.928	0.903	5.57531e-22
RAC1	3.34406e-26	-0.469174	0.971	0.928	6.4353e-22
CITED2	7.09757e-26	0.546207	0.92	0.64	1.36586e-21
CSNK1E	7.33089e-26	0.530079	0.993	0.788	1.41076e-21
FKBP4	7.51246e-26	-0.548879	0.978	0.905	1.4457e-21
CDH1	8.73685e-26	0.506547	0.957	0.653	1.68132e-21
NPM3	1.65845e-25	-0.443052	0.913	0.825	3.19153e-21
LYAR	1.87776e-25	-0.304719	0.92	0.79	3.61356e-21
SNHG14	3.0952e-25	0.869831	1	0.864	5.9564e-21
EIF4EBP1	3.23968e-25	-0.431351	0.942	0.877	6.23445e-21
PLPP1	3.59604e-25	0.39423	0.877	0.605	6.92021e-21
GAS5	5.6445e-25	0.549229	0.993	0.922	1.08623e-20
PTPN4	1.81911e-24	0.483741	0.935	0.675	3.5007e-20
PSAT1	2.11457e-24	-0.654885	0.964	0.894	4.06927e-20
ID3	2.90518e-24	-0.836628	0.812	0.841	5.59074e-20
SYT6	3.20875e-24	0.432972	0.913	0.6	6.17491e-20
FEZ1	5.50449e-24	0.427291	0.906	0.6	1.05928e-19
MED14	8.24093e-24	0.356454	0.913	0.633	1.58588e-19
SLC4A7	9.32894e-24	-0.258357	0.906	0.7	1.79526e-19
AP000459.2	9.85048e-24	-0.484479	0.428	0.697	1.89563e-19
SEMA6A	1.03916e-23	-0.278332	0.957	0.737	1.99977e-19
TTYH1	1.07856e-23	0.374933	0.899	0.633	2.07559e-19
INSR	1.32196e-23	0.378255	0.928	0.614	2.54398e-19
AASS	1.70835e-23	0.652272	0.986	0.714	3.28755e-19
IER2	2.34697e-23	-0.461734	0.92	0.799	4.51651e-19
CLU	2.4716e-23	0.535405	0.913	0.704	4.75635e-19
MSI2	2.95722e-23	0.454718	0.957	0.69	5.69088e-19
PRRT2	4.43004e-23	0.269662	0.812	0.489	8.52517e-19
COBL	5.75002e-23	0.373943	0.891	0.58	1.10653e-18
LINC00599	5.78381e-23	0.295469	0.877	0.552	1.11304e-18
CYB5A	6.35202e-23	-0.357863	0.949	0.848	1.22238e-18
BNC2	1.19805e-22	0.290285	0.833	0.494	2.30553e-18
HMGN2	1.30648e-22	-0.433816	0.986	0.91	2.51418e-18
PTAR1	1.58001e-22	0.416558	0.935	0.654	3.04057e-18
CUZD1	2.13779e-22	0.391948	0.659	0.236	4.11396e-18
TXN	2.49712e-22	-0.507952	0.964	0.919	4.80545e-18
MT1X	2.79272e-22	-0.995851	0.536	0.728	5.37431e-18
EIF2S2	3.24901e-22	-0.442525	0.978	0.928	6.25239e-18
AC007218.1	3.86228e-22	0.506746	0.899	0.591	7.43257e-18
SLC39A14	4.53485e-22	-0.294899	0.928	0.757	8.72687e-18
FTX	4.54165e-22	0.46252	0.949	0.638	8.73995e-18
CLDN3	5.97827e-22	0.4904	0.899	0.616	1.15046e-17
VDAC1	6.63267e-22	-0.365361	0.978	0.896	1.27639e-17
BICD1	6.98188e-22	0.361082	0.928	0.616	1.34359e-17
BEX1	8.77168e-22	-0.51119	0.884	0.825	1.68802e-17
LSM3	9.02803e-22	-0.507009	0.942	0.887	1.73735e-17
AKIRIN1	1.12067e-21	0.489781	1	0.873	2.15662e-17
NANOG	1.33071e-21	-0.421127	0.833	0.75	2.56081e-17
CXXC5	1.36439e-21	-0.356949	0.87	0.772	2.62563e-17
MALAT1	1.59135e-21	1.3861	1	0.822	3.06239e-17
REXO2	2.4514e-21	-0.394335	0.949	0.831	4.71748e-17
FZD5	2.80061e-21	0.357854	0.913	0.586	5.38949e-17
EDIL3	3.66215e-21	0.27724	0.877	0.549	7.04743e-17
EIF5A	3.68301e-21	-0.609783	0.971	0.952	7.08758e-17
L1TD1	3.69165e-21	-0.577264	0.993	0.942	7.10421e-17
TOMM40	4.37963e-21	-0.353032	0.957	0.854	8.42816e-17
MEX3A	5.20083e-21	0.419061	0.964	0.674	1.00085e-16
NUDT15	6.55291e-21	-0.421913	0.92	0.79	1.26104e-16
NDUFAF8	7.48968e-21	-0.298764	0.92	0.767	1.44131e-16
JAG1	1.12991e-20	0.267865	0.87	0.556	2.17439e-16
NHP2	1.51885e-20	-0.298316	0.978	0.887	2.92288e-16
TRIM24	1.61037e-20	0.526776	0.978	0.774	3.09899e-16
FDFT1	1.9458e-20	-0.564055	0.971	0.887	3.74449e-16
SNRPG	2.00353e-20	-0.439968	0.978	0.937	3.85559e-16
GAS6	2.14395e-20	0.299236	0.848	0.52	4.12582e-16
MIAT	2.15721e-20	0.443274	0.906	0.603	4.15134e-16
CSTB	2.82809e-20	-0.399657	0.949	0.869	5.44237e-16
PABPC4	3.13128e-20	-0.4003	0.949	0.838	6.02584e-16
PLPP3	3.52526e-20	0.25815	0.841	0.549	6.78402e-16
MIR302CHG	3.55915e-20	0.550147	1	0.922	6.84923e-16
RANBP1	3.72653e-20	-0.45747	0.971	0.954	7.17133e-16
DEGS1	4.22893e-20	0.326034	0.913	0.628	8.13816e-16
SNHG7	7.14202e-20	0.480692	0.986	0.778	1.37441e-15
ARPC2	7.68553e-20	-0.306182	0.978	0.899	1.479e-15
HDDC2	9.81948e-20	-0.278008	0.906	0.818	1.88966e-15
LINC02582	1.1169e-19	0.598716	0.899	0.626	2.14937e-15
GABPB1-AS1	1.14734e-19	0.658363	0.971	0.702	2.20793e-15
SAMHD1	1.27978e-19	0.26589	0.92	0.603	2.46281e-15
RBM47	1.59028e-19	-0.357835	0.754	0.709	3.06034e-15
LZTS3	1.66319e-19	0.283582	0.891	0.559	3.20065e-15
FRAS1	1.77914e-19	0.332517	0.906	0.6	3.42379e-15
KAT7	2.61186e-19	-0.315009	0.855	0.72	5.02627e-15
GDF11	3.04097e-19	0.317326	0.884	0.593	5.85205e-15
CMAS	3.12321e-19	-0.446887	0.899	0.802	6.01031e-15
DDX18	3.19831e-19	-0.530576	0.935	0.878	6.15482e-15
SLC16A1-AS1	3.30246e-19	0.393728	0.913	0.619	6.35526e-15
MYO1E	3.56353e-19	0.322093	0.906	0.617	6.85766e-15
CACYBP	4.66965e-19	-0.449213	0.971	0.873	8.98627e-15
FGF2	5.03891e-19	0.41099	0.935	0.709	9.69687e-15
CDKN1C	5.1276e-19	0.312817	0.848	0.563	9.86755e-15
PA2G4	5.70616e-19	-0.405567	0.971	0.905	1.09809e-14
IGDCC3	5.77957e-19	-0.288054	0.848	0.718	1.11222e-14
PNISR	5.83206e-19	0.650368	0.986	0.817	1.12232e-14
LGR4	7.13748e-19	0.31406	0.891	0.614	1.37354e-14
PRKX	7.95781e-19	0.31674	0.964	0.67	1.5314e-14
SNRPD1	8.33021e-19	-0.490984	0.986	0.935	1.60307e-14
SLC1A5	8.40015e-19	-0.25209	0.92	0.76	1.61652e-14
TBCA	1.21197e-18	-0.344176	0.978	0.901	2.33231e-14
FGD4	1.27794e-18	0.283414	0.891	0.616	2.45927e-14
B4GALT4	1.30583e-18	0.31598	0.92	0.646	2.51293e-14
CDC26	1.33815e-18	-0.252992	0.891	0.778	2.57513e-14
ID1	1.40765e-18	0.61782	0.92	0.774	2.70888e-14
PTGES2	1.4372e-18	-0.363106	0.87	0.758	2.76574e-14
CGNL1	1.44339e-18	0.319553	0.928	0.638	2.77766e-14
HSPD1	1.55486e-18	-0.612031	0.986	0.988	2.99216e-14
TMA7	1.89575e-18	-0.463364	0.978	0.956	3.64819e-14
RABGAP1L	2.08647e-18	0.36634	0.942	0.693	4.0152e-14
ADRM1	2.13572e-18	-0.385173	0.935	0.834	4.10997e-14
CLIC1	2.7477e-18	-0.494831	0.928	0.887	5.28768e-14
UBE2N	3.01265e-18	-0.462362	0.942	0.861	5.79754e-14
EIF5B	3.12051e-18	-0.444816	0.978	0.892	6.00511e-14
PHB	3.25297e-18	-0.377612	0.971	0.912	6.26002e-14
LINC01356	3.50857e-18	0.796701	0.848	0.642	6.7519e-14
MRPS15	3.9694e-18	-0.280492	0.949	0.852	7.63871e-14
SLC16A1	4.08655e-18	0.533304	0.971	0.757	7.86415e-14
UQCRQ	4.32457e-18	-0.277093	0.971	0.85	8.3222e-14
SIRT1	4.97218e-18	0.311646	0.92	0.637	9.56846e-14
HNRNPAB	5.17958e-18	-0.369378	0.964	0.915	9.96758e-14
LINC00685	6.7558e-18	0.333092	0.862	0.58	1.30009e-13
ATRX	7.57217e-18	0.534402	0.978	0.778	1.45719e-13
VSNL1	8.77125e-18	-0.649924	0.543	0.755	1.68794e-13
IDH1	1.10182e-17	-0.391415	0.957	0.868	2.12035e-13
PAK1	1.28017e-17	-0.260292	0.942	0.785	2.46355e-13
PNRC1	1.36897e-17	0.360987	0.913	0.647	2.63444e-13
LIMD2	1.38398e-17	-0.351992	0.841	0.774	2.66333e-13
U2SURP	1.43303e-17	-0.311576	0.964	0.831	2.75772e-13
HMGN5	1.75736e-17	-0.266888	0.92	0.769	3.38187e-13
BTG1	1.81102e-17	0.363022	0.964	0.73	3.48512e-13
SAT2	1.85635e-17	0.403076	0.928	0.748	3.57236e-13
APELA	2.10367e-17	0.30821	0.732	0.448	4.04831e-13
MSH2	2.1521e-17	-0.441995	0.935	0.832	4.14149e-13
MRPL12	2.15772e-17	-0.32156	0.942	0.854	4.15232e-13
ZFAS1	2.16642e-17	0.443744	0.986	0.922	4.16906e-13
EIF4G1	2.26594e-17	-0.3352	0.964	0.838	4.36058e-13
SNU13	2.33376e-17	-0.459632	0.935	0.892	4.49109e-13
UCHL1	2.70237e-17	-0.516064	0.986	0.94	5.20044e-13
FZD7	2.72358e-17	0.492095	0.949	0.714	5.24125e-13
KIAA1522	2.97955e-17	0.266154	0.899	0.593	5.73384e-13
EBNA1BP2	3.00954e-17	-0.418446	0.92	0.811	5.79155e-13
PSMA7	3.14885e-17	-0.41037	0.978	0.951	6.05965e-13
TXNL4A	3.25968e-17	-0.252362	0.942	0.838	6.27293e-13
DDR1	3.61116e-17	0.346673	0.942	0.688	6.94931e-13
JPT1	3.82355e-17	-0.402153	0.971	0.908	7.35804e-13
CRABP2	3.87841e-17	0.580744	0.928	0.781	7.4636e-13
BZW2	4.12436e-17	-0.261357	0.942	0.771	7.93691e-13
GTF3C6	4.28881e-17	-0.291266	0.928	0.834	8.25338e-13
YWHAB	5.84102e-17	-0.382703	0.986	0.945	1.12405e-12
TOMM7	6.36344e-17	-0.35514	0.971	0.924	1.22458e-12
PDAP1	6.93986e-17	-0.282728	0.978	0.873	1.33551e-12
ETV5	8.59051e-17	-0.328245	0.319	0.642	1.65316e-12
AC006329.1	8.86345e-17	-0.257683	0.884	0.771	1.70568e-12
BCL11A	1.24023e-16	0.327174	0.891	0.637	2.38669e-12
SKIL	1.29192e-16	-0.495824	0.862	0.785	2.48618e-12
PRICKLE1	1.32591e-16	0.320304	0.783	0.513	2.55157e-12
SLIRP	1.80567e-16	-0.569731	0.957	0.921	3.47484e-12
HLA-C	1.8958e-16	0.438926	0.957	0.743	3.64828e-12
PBX1	1.91837e-16	0.417568	0.978	0.788	3.69171e-12
TPM1	1.93689e-16	0.469413	1	0.914	3.72735e-12
ADSL	2.0005e-16	-0.315832	0.935	0.825	3.84976e-12
SOX11	2.488e-16	0.428032	0.978	0.79	4.78791e-12
SMIM14	2.49217e-16	0.295392	0.92	0.647	4.79594e-12
PHACTR2	2.51386e-16	0.322739	0.949	0.7	4.83767e-12
POLR2J3	2.51915e-16	0.458064	0.957	0.661	4.84785e-12
PDCD5	2.77578e-16	-0.323467	0.928	0.843	5.34172e-12
ZNF292	2.87028e-16	0.354713	0.964	0.683	5.52357e-12
MICOS10	3.17271e-16	-0.370312	0.949	0.871	6.10556e-12
USP44	4.234e-16	-0.337642	0.957	0.862	8.14792e-12
DDX17	5.56105e-16	0.396689	1	0.827	1.07017e-11
EIF1AX	5.58436e-16	-0.29236	0.957	0.884	1.07465e-11
SYNE2	5.86502e-16	0.309303	0.971	0.67	1.12866e-11
LTBP4	6.42234e-16	0.302818	0.906	0.637	1.23592e-11
GPRC5B	6.48338e-16	0.262883	0.913	0.642	1.24766e-11
NOTCH3	7.66241e-16	0.288125	0.899	0.621	1.47456e-11
POLR2G	8.00326e-16	-0.396813	0.87	0.792	1.54015e-11
MFHAS1	8.8818e-16	0.335383	0.942	0.707	1.70921e-11
NOP10	9.25622e-16	-0.323363	0.971	0.905	1.78127e-11
CMSS1	9.57025e-16	-0.331259	0.913	0.804	1.8417e-11
PLEKHG4B	9.82911e-16	0.324584	0.891	0.608	1.89151e-11
CYCS	1.11511e-15	-0.554871	0.971	0.938	2.14591e-11
ACAT2	1.1462e-15	-0.695815	0.913	0.866	2.20574e-11
CCND2	1.15171e-15	-0.264612	0.949	0.787	2.21635e-11
CYP2S1	1.15746e-15	0.404465	0.949	0.727	2.22743e-11
CALD1	1.15896e-15	-0.300329	0.971	0.854	2.2303e-11
AFDN	1.29049e-15	0.365498	0.971	0.753	2.48342e-11
ADGRV1	1.29886e-15	0.328248	0.913	0.646	2.49952e-11
RHEB	1.29895e-15	-0.268452	0.971	0.877	2.4997e-11
FSTL1	1.37633e-15	0.400423	0.964	0.746	2.64862e-11
FDPS	1.61818e-15	-0.550871	0.949	0.896	3.11403e-11
KCNQ1OT1	1.73197e-15	0.49766	0.92	0.649	3.33301e-11
TMEFF1	1.79977e-15	0.362963	0.971	0.76	3.46347e-11
GCSH	1.89204e-15	-0.321568	0.949	0.901	3.64104e-11
PSMA1	1.96145e-15	-0.288687	0.957	0.847	3.77461e-11
KRT10	2.27198e-15	-0.251894	0.906	0.785	4.3722e-11
ANKRD12	2.28818e-15	0.31197	0.928	0.64	4.40338e-11
PSMD14	2.30495e-15	-0.377278	0.942	0.84	4.43565e-11
EMG1	2.54932e-15	-0.353881	0.87	0.776	4.90591e-11
PRR14L	2.61669e-15	0.292595	0.949	0.697	5.03555e-11
MRPS26	2.69615e-15	-0.301213	0.957	0.855	5.18846e-11
ATP5MD	2.94281e-15	-0.317888	0.971	0.91	5.66315e-11
AP2S1	3.04877e-15	-0.288925	0.971	0.884	5.86706e-11
CCT2	3.35676e-15	-0.442245	0.949	0.919	6.45976e-11
FZD2	3.64956e-15	0.306409	0.949	0.684	7.0232e-11
BZW1	3.80985e-15	-0.391048	0.949	0.861	7.33167e-11
HMGB1	4.56657e-15	-0.502093	0.993	0.995	8.78791e-11
MYC	4.73709e-15	-0.460842	0.58	0.679	9.11606e-11
AURKAIP1	5.00472e-15	-0.250202	0.964	0.898	9.63108e-11
FAM136A	5.16564e-15	-0.260743	0.942	0.825	9.94077e-11
CACNG8	5.25914e-15	0.276739	0.833	0.529	1.01207e-10
MRPL3	5.59275e-15	-0.374788	0.942	0.862	1.07627e-10
CTSV	5.72301e-15	0.384247	0.928	0.679	1.10134e-10
AKAP12	5.72503e-15	0.390029	0.971	0.713	1.10173e-10
LAMB1	6.25044e-15	0.282678	0.884	0.596	1.20283e-10
NES	6.36357e-15	0.321144	0.986	0.767	1.22461e-10
SNRPB2	6.51503e-15	-0.394234	0.964	0.866	1.25375e-10
POLR2L	6.6451e-15	-0.388073	0.942	0.877	1.27878e-10
H2AFZ	6.65693e-15	-0.539959	0.978	0.984	1.28106e-10
SNHG1	6.95266e-15	0.411113	0.957	0.772	1.33797e-10
NUDC	8.97929e-15	-0.557815	0.949	0.905	1.72798e-10
RBPMS2	9.51001e-15	-0.327582	0.92	0.836	1.83011e-10
LIN28B	9.99874e-15	0.314157	0.964	0.732	1.92416e-10
PRDX3	1.00505e-14	-0.252495	0.964	0.864	1.93411e-10
GSPT1	1.01428e-14	-0.340254	0.935	0.871	1.95188e-10
MRPS34	1.01663e-14	-0.343067	0.964	0.896	1.9564e-10
PPA1	1.05028e-14	-0.290806	0.964	0.873	2.02117e-10
PYCR2	1.05437e-14	-0.338947	0.812	0.718	2.02904e-10
TIMM8B	1.10564e-14	-0.309309	0.935	0.829	2.12769e-10
RRP1B	1.15736e-14	-0.367712	0.906	0.824	2.22722e-10
ARL4C	1.31298e-14	0.267007	0.797	0.529	2.52669e-10
MTA3	1.38413e-14	0.373745	0.971	0.799	2.66362e-10
SCG3	1.43564e-14	-0.297766	0.87	0.721	2.76275e-10
STX16	1.48227e-14	0.288708	0.935	0.631	2.85247e-10
GOLGA4	1.53387e-14	0.25431	0.971	0.686	2.95178e-10
HNRNPD	1.5669e-14	-0.346297	0.986	0.938	3.01534e-10
TUBB4B	1.59044e-14	-0.673912	0.935	0.915	3.06065e-10
DKC1	1.68021e-14	-0.278543	0.942	0.817	3.2334e-10
ESRG	1.7184e-14	0.557876	0.993	0.928	3.30689e-10
TNNT1	1.97861e-14	0.394739	0.928	0.776	3.80763e-10
TOMM22	1.99194e-14	-0.335776	0.913	0.848	3.83329e-10
REST	2.02785e-14	0.307953	0.964	0.746	3.90239e-10
EMD	2.06421e-14	0.334105	0.942	0.711	3.97237e-10
SCD	2.27161e-14	-0.386941	0.971	0.84	4.37149e-10
TIMM50	2.62418e-14	-0.288653	0.913	0.811	5.04998e-10
HMGCS1	2.71221e-14	-0.669242	0.942	0.845	5.21939e-10
PPIB	2.71494e-14	-0.307761	0.957	0.857	5.22464e-10
COL9A3	2.74755e-14	0.301147	0.935	0.668	5.28738e-10
DCTPP1	2.87455e-14	-0.320217	0.899	0.781	5.53178e-10
GARS	3.01427e-14	-0.406679	0.913	0.834	5.80067e-10
HCG18	3.06603e-14	0.281975	0.928	0.633	5.90027e-10
SYNCRIP	3.10226e-14	-0.275689	0.964	0.866	5.96999e-10
ARID1B	3.12744e-14	0.361645	0.949	0.7	6.01844e-10
NIFK	3.16138e-14	-0.331272	0.92	0.82	6.08376e-10
SCAND1	3.24798e-14	-0.379242	0.906	0.836	6.25041e-10
WSB1	3.34895e-14	0.423307	0.971	0.734	6.44473e-10
AP1S2	3.34954e-14	0.415173	0.971	0.822	6.44585e-10
GPC3	3.35816e-14	0.257547	0.899	0.594	6.46243e-10
ZNRD2	3.4151e-14	-0.358716	0.804	0.755	6.57202e-10
PFN1	3.54312e-14	-0.450525	1	0.988	6.81838e-10
ZNF322	3.8266e-14	0.36904	0.928	0.684	7.36392e-10
IFITM2	4.16622e-14	-0.310509	0.877	0.769	8.01747e-10
SLC7A5	4.75227e-14	-0.47478	0.804	0.769	9.14528e-10
TNRC6B	5.45853e-14	0.322576	0.964	0.737	1.05044e-09
HSPA4	5.47668e-14	-0.562095	0.949	0.91	1.05393e-09
C1orf21	5.83284e-14	0.270407	0.884	0.663	1.12247e-09
C7orf50	5.92365e-14	-0.292948	0.87	0.771	1.13995e-09
MRPL36	6.28364e-14	-0.281292	0.891	0.78	1.20922e-09
PSMD11	6.59866e-14	-0.334033	0.942	0.857	1.26985e-09
PPP1CA	7.85177e-14	-0.277921	0.935	0.866	1.51099e-09
GART	7.92285e-14	-0.272856	0.935	0.801	1.52467e-09
NSD1	7.97165e-14	0.286324	0.971	0.72	1.53406e-09
PEG10	8.09433e-14	-0.317687	0.942	0.797	1.55767e-09
RPUSD3	8.62428e-14	-0.26028	0.906	0.774	1.65966e-09
TMED2	8.69007e-14	-0.26825	0.942	0.827	1.67232e-09
BASP1	8.79942e-14	0.461683	0.971	0.859	1.69336e-09
NOLC1	9.36087e-14	-0.260511	0.935	0.818	1.80141e-09
ELOVL6	1.1309e-13	-0.28705	0.899	0.757	2.1763e-09
AHSA1	1.23918e-13	-0.326993	0.949	0.825	2.38469e-09
SPATS2L	1.31404e-13	-0.350122	0.884	0.788	2.52875e-09
SEM1	1.32688e-13	-0.312972	0.957	0.915	2.55345e-09
FBXO2	1.33875e-13	0.296857	0.92	0.702	2.57629e-09
ENSA	1.48619e-13	-0.283247	0.949	0.859	2.86002e-09
PSMA4	1.50712e-13	-0.366075	0.964	0.899	2.9003e-09
TCEAL8	1.57647e-13	-0.322489	0.913	0.824	3.03376e-09
NTMT1	1.63945e-13	-0.299813	0.884	0.778	3.15496e-09
NUTF2	1.65788e-13	-0.333725	0.949	0.848	3.19042e-09
BPTF	1.71693e-13	0.353502	0.993	0.82	3.30406e-09
RSL24D1	1.86717e-13	-0.307529	0.957	0.864	3.59317e-09
YWHAQ	1.88638e-13	-0.45218	0.957	0.938	3.63014e-09
DPPA4	1.99684e-13	-0.265699	0.986	0.915	3.84271e-09
GOLGB1	2.32101e-13	0.338494	0.942	0.668	4.46655e-09
RIF1	2.32979e-13	0.335235	0.986	0.776	4.48344e-09
PSMA6	2.46003e-13	-0.257092	0.964	0.843	4.73409e-09
CAMLG	2.46212e-13	0.346781	0.942	0.78	4.73811e-09
GMNN	2.47061e-13	-0.308891	0.928	0.806	4.75444e-09
KMT2A	2.67723e-13	0.293709	0.971	0.711	5.15206e-09
IMP4	2.75902e-13	-0.253689	0.87	0.748	5.30946e-09
AARS	2.82485e-13	-0.281229	0.899	0.788	5.43614e-09
SDF2L1	2.9123e-13	-0.326034	0.862	0.762	5.60442e-09
CDC123	3.24402e-13	-0.389249	0.957	0.85	6.24279e-09
PSMD7	3.34378e-13	-0.322934	0.971	0.885	6.43477e-09
NOL7	3.52711e-13	-0.371417	0.935	0.841	6.78757e-09
CALM1	3.57439e-13	-0.385994	0.993	0.944	6.87855e-09
MCM5	3.70205e-13	-0.312062	0.899	0.792	7.12422e-09
ACVR2B	3.94961e-13	0.274622	0.971	0.721	7.60063e-09
POR	3.9971e-13	0.291283	0.935	0.679	7.69202e-09
DDX21	4.14172e-13	-0.385654	0.971	0.915	7.97032e-09
CAP1	4.24418e-13	-0.322536	0.957	0.871	8.16751e-09
PPDPF	4.76931e-13	-0.272888	0.92	0.836	9.17807e-09
SUCLA2	5.22259e-13	-0.332772	0.92	0.792	1.00503e-08
SNHG32	5.24259e-13	0.299509	0.957	0.744	1.00888e-08
CLN8	5.37626e-13	0.256369	0.92	0.658	1.03461e-08
PSMC1	5.44159e-13	-0.292017	0.935	0.811	1.04718e-08
KANSL1	6.10398e-13	0.273741	0.957	0.695	1.17465e-08
PKIB	6.19947e-13	-0.319792	0.906	0.82	1.19303e-08
HBD	6.33848e-13	-0.478515	0.935	0.864	1.21978e-08
IMP3	6.37227e-13	-0.287058	0.928	0.822	1.22628e-08
TUBB2A	7.05341e-13	-0.428912	0.92	0.827	1.35736e-08
ERH	7.16063e-13	-0.427536	0.964	0.924	1.37799e-08
PTPRF	7.25534e-13	0.289912	0.957	0.702	1.39622e-08
NDUFAF4	7.70932e-13	-0.33721	0.87	0.781	1.48358e-08
CCT6A	7.82239e-13	-0.366745	0.986	0.928	1.50534e-08
MCM7	8.18598e-13	-0.394817	0.935	0.862	1.57531e-08
DYNC1H1	8.50659e-13	0.255224	0.978	0.732	1.63701e-08
ABCE1	9.42347e-13	-0.255568	0.92	0.822	1.81345e-08
EIF3J	9.56029e-13	-0.307691	0.877	0.785	1.83978e-08
ATP5ME	9.58044e-13	-0.284762	0.986	0.917	1.84366e-08
SF3A3	9.73202e-13	-0.310524	0.942	0.838	1.87283e-08
MRPL21	1.03442e-12	-0.293719	0.906	0.776	1.99064e-08
RRM2	1.07223e-12	-0.390824	0.891	0.834	2.0634e-08
PSMA5	1.15438e-12	-0.436722	0.935	0.864	2.2215e-08
PPP1R14B	1.26213e-12	-0.324112	0.971	0.938	2.42884e-08
HSPA9	1.316e-12	-0.292243	0.971	0.88	2.53252e-08
UFD1	1.76449e-12	-0.312264	0.884	0.792	3.39559e-08
MAL2	1.91191e-12	-0.262779	0.928	0.827	3.67928e-08
FZD3	2.20962e-12	0.265754	0.942	0.693	4.2522e-08
GNL3	2.25241e-12	-0.337463	0.942	0.866	4.33454e-08
USP9Y	2.34228e-12	0.265447	0.928	0.67	4.50749e-08
ZMYND8	2.36885e-12	0.293017	0.978	0.774	4.55861e-08
NAA50	2.55757e-12	-0.30636	0.942	0.817	4.92179e-08
HK1	2.91262e-12	-0.263055	0.928	0.822	5.60504e-08
EIF2S1	2.92927e-12	-0.307859	0.891	0.787	5.63709e-08
THYN1	2.9402e-12	-0.26458	0.928	0.813	5.65812e-08
WDR43	3.05134e-12	-0.288789	0.935	0.801	5.872e-08
ANP32B	3.10192e-12	-0.282115	0.971	0.843	5.96933e-08
CCT5	3.13235e-12	-0.462712	0.993	0.94	6.0279e-08
ACLY	3.21459e-12	-0.327329	0.964	0.852	6.18616e-08
GULP1	3.3101e-12	0.284369	0.971	0.767	6.36995e-08
NOP16	3.31997e-12	-0.335309	0.826	0.75	6.38895e-08
UCP2	3.46405e-12	-0.324118	0.812	0.739	6.66622e-08
NCL	3.70634e-12	-0.653545	0.986	0.979	7.13249e-08
CD99	3.80955e-12	0.262713	0.913	0.693	7.33109e-08
TP53	3.90053e-12	-0.266431	0.964	0.864	7.50618e-08
BOP1	3.90058e-12	-0.385696	0.913	0.81	7.50628e-08
ASS1	4.1407e-12	0.325783	0.906	0.72	7.96836e-08
NDUFB3	4.25645e-12	-0.337584	0.884	0.794	8.19111e-08
PSMD8	4.38103e-12	-0.321662	0.949	0.85	8.43085e-08
DSP	4.83891e-12	0.305934	0.957	0.739	9.312e-08
TMEM161B-AS1	4.84231e-12	0.306336	0.906	0.638	9.31855e-08
ELOC	4.84374e-12	-0.293655	0.935	0.852	9.32129e-08
RTRAF	4.9225e-12	-0.357286	0.986	0.912	9.47286e-08
LUC7L3	5.14601e-12	0.391826	0.993	0.804	9.90297e-08
RUVBL1	5.88812e-12	-0.321579	0.906	0.825	1.13311e-07
EIF3I	6.30084e-12	-0.321784	0.949	0.875	1.21253e-07
AKAP1	6.31414e-12	0.31133	0.92	0.677	1.21509e-07
CYP51A1	6.67361e-12	-0.2725	0.92	0.774	1.28427e-07
TXNDC17	6.86425e-12	-0.43163	0.957	0.903	1.32096e-07
MT1G	6.94858e-12	-0.558493	0.217	0.476	1.33718e-07
IVNS1ABP	6.96993e-12	-0.371273	0.899	0.802	1.34129e-07
SNRPC	7.81897e-12	-0.317717	0.942	0.878	1.50468e-07
PCNA	7.81941e-12	-0.579751	0.884	0.859	1.50477e-07
ZNF644	8.67764e-12	0.269026	0.935	0.691	1.66992e-07
MAD2L1	8.70156e-12	-0.428071	0.899	0.825	1.67453e-07
LINC01578	8.85104e-12	0.255224	0.978	0.771	1.70329e-07
PRMT1	9.30071e-12	-0.327782	0.993	0.931	1.78983e-07
DST	9.64769e-12	0.258461	0.942	0.674	1.8566e-07
TSN	9.6679e-12	-0.27757	0.906	0.804	1.86049e-07
SEC61G	9.89204e-12	-0.37572	0.949	0.903	1.90362e-07
CAPZB	1.03078e-11	-0.270584	0.971	0.891	1.98364e-07
CTXN1	1.08482e-11	-0.27464	0.855	0.75	2.08762e-07
CFL1	1.14011e-11	-0.47545	0.986	0.984	2.19403e-07
PARK7	1.17304e-11	-0.433678	0.942	0.935	2.25739e-07
APLP2	1.19594e-11	0.353474	0.971	0.765	2.30147e-07
YARS	1.22632e-11	-0.250096	0.942	0.84	2.35993e-07
ENOPH1	1.23342e-11	-0.302976	0.92	0.801	2.3736e-07
SOCS1	1.25167e-11	-0.283802	0.652	0.686	2.40871e-07
FGFBP3	1.40319e-11	0.373724	0.964	0.765	2.7003e-07
ZNF814	1.54347e-11	0.250173	0.913	0.684	2.97025e-07
ALPL	1.61665e-11	0.269089	0.957	0.751	3.11108e-07
BST2	1.73118e-11	0.265121	0.696	0.414	3.33149e-07
JPX	1.77593e-11	0.250602	0.935	0.684	3.4176e-07
TPM3	1.85382e-11	-0.289309	0.971	0.922	3.56749e-07
CCNG1	1.95929e-11	0.320308	0.957	0.848	3.77046e-07
SNHG29	2.06048e-11	0.382703	0.993	0.974	3.96519e-07
POMP	2.24555e-11	-0.473926	0.942	0.914	4.32133e-07
SOD1	2.37078e-11	-0.423507	0.942	0.903	4.56233e-07
DDX24	2.50305e-11	-0.288685	0.942	0.825	4.81687e-07
MARCKS	2.52356e-11	0.357855	0.978	0.869	4.85634e-07
TCF7L2	2.59538e-11	0.28658	0.913	0.716	4.99455e-07
GANAB	2.59931e-11	0.271249	0.949	0.697	5.00212e-07
ETV1	2.68481e-11	-0.344477	0.659	0.691	5.16666e-07
NPC2	3.09409e-11	0.311024	0.971	0.843	5.95427e-07
HNRNPM	3.10099e-11	-0.484298	0.964	0.931	5.96755e-07
NUDCD1	3.59591e-11	-0.250602	0.913	0.76	6.91997e-07
ID2	4.28597e-11	0.274395	0.891	0.656	8.24792e-07
VCP	4.63753e-11	-0.378895	0.971	0.901	8.92446e-07
PYCR1	5.32758e-11	-0.257131	0.92	0.801	1.02524e-06
POU5F1	5.43605e-11	-0.428424	0.993	0.988	1.04611e-06
TUBA1B	5.49532e-11	-0.592146	1	0.993	1.05752e-06
HSPE1	5.54535e-11	-0.468382	0.978	0.981	1.06715e-06
LPP	5.5641e-11	0.257255	0.884	0.649	1.07075e-06
CDKN3	5.61276e-11	-0.250821	0.797	0.72	1.08012e-06
S100A10	5.668e-11	-0.461084	0.913	0.841	1.09075e-06
ERG28	6.42997e-11	-0.266818	0.906	0.78	1.23738e-06
SSRP1	7.17109e-11	-0.297708	0.949	0.884	1.38e-06
BRI3	7.22054e-11	0.348069	0.949	0.815	1.38952e-06
EPRS	7.29852e-11	-0.259042	0.942	0.818	1.40453e-06
PSMB2	7.42841e-11	-0.28898	0.957	0.862	1.42952e-06
DMAC1	7.47905e-11	-0.266701	0.87	0.771	1.43927e-06
AKR1B1	8.39156e-11	-0.271763	0.928	0.836	1.61487e-06
AC004889.1	8.39617e-11	-0.322893	0.594	0.686	1.61576e-06
VIM	9.3226e-11	0.326019	0.935	0.725	1.79404e-06
NTS	9.391e-11	-0.26338	0.196	0.487	1.8072e-06
EIF4E	9.47433e-11	-0.276724	0.949	0.847	1.82324e-06
MVD	1.0683e-10	-0.401777	0.819	0.741	2.05584e-06
NIPBL	1.11677e-10	0.257984	0.957	0.73	2.14911e-06
PSMB7	1.14283e-10	-0.3725	0.942	0.875	2.19926e-06
SRSF3	1.20958e-10	-0.337475	1	0.935	2.32771e-06
RAB13	1.31698e-10	-0.610777	0.964	0.831	2.53439e-06
MYL12A	1.33229e-10	-0.407826	0.913	0.877	2.56385e-06
TRAPPC4	1.35703e-10	-0.307578	0.899	0.801	2.61146e-06
PPIF	1.39331e-10	-0.28063	0.819	0.744	2.68129e-06
PAK1IP1	1.40185e-10	-0.328795	0.891	0.776	2.69772e-06
ILF2	1.45434e-10	-0.380104	0.957	0.907	2.79873e-06
PPIA	1.4631e-10	-0.441847	1	0.995	2.81558e-06
EEF1E1	1.60444e-10	-0.280729	0.949	0.85	3.08758e-06
SSBP1	1.84677e-10	-0.426954	0.964	0.915	3.55392e-06
GGCT	1.92688e-10	-0.254837	0.949	0.866	3.70809e-06
PSMC3	1.9412e-10	-0.448464	0.899	0.843	3.73564e-06
PSMC5	2.08682e-10	-0.28512	0.928	0.862	4.01587e-06
RPA3	2.15318e-10	-0.361681	0.913	0.836	4.14359e-06
PPM1G	2.17262e-10	-0.254796	0.957	0.887	4.181e-06
MT-CYB	2.21582e-10	0.305195	1	0.868	4.26412e-06
GLRX3	2.2696e-10	-0.299282	0.942	0.841	4.36761e-06
BRIX1	2.45147e-10	-0.299958	0.906	0.802	4.71761e-06
PDPN	2.46309e-10	0.282085	0.928	0.772	4.73997e-06
CCT7	2.7195e-10	-0.406695	0.957	0.926	5.23341e-06
GMPS	3.06524e-10	-0.358962	0.906	0.82	5.89875e-06
PSMC4	3.06563e-10	-0.495085	0.884	0.832	5.8995e-06
POLR2F	3.15953e-10	-0.26888	0.949	0.875	6.08021e-06
PTGES3	3.18883e-10	-0.336321	0.993	0.959	6.13658e-06
ARGLU1	3.32959e-10	0.283261	0.978	0.776	6.40746e-06
LCK	3.43242e-10	-0.299121	0.717	0.713	6.60535e-06
RND2	3.77839e-10	0.310741	0.92	0.78	7.27113e-06
PSMC2	4.03217e-10	-0.307535	0.884	0.769	7.7595e-06
TUBA1C	4.35509e-10	-0.566787	0.957	0.919	8.38094e-06
COPS3	4.51577e-10	-0.264801	0.92	0.792	8.69014e-06
HNRNPA3	4.57106e-10	-0.39049	0.986	0.952	8.79654e-06
ARF4	4.58884e-10	-0.336292	0.92	0.836	8.83077e-06
LSM6	5.08915e-10	-0.259051	0.92	0.825	9.79355e-06
CKB	5.09155e-10	0.365804	0.986	0.921	9.79817e-06
DDIT4	5.16009e-10	0.472828	0.891	0.691	9.93007e-06
ZIC2	5.17461e-10	0.327155	0.949	0.764	9.95802e-06
PAICS	5.34682e-10	-0.353021	0.971	0.935	1.02894e-05
DDX1	5.39504e-10	-0.265105	0.906	0.801	1.03822e-05
MYL12B	5.58626e-10	-0.427773	0.928	0.891	1.07502e-05
NAE1	5.64017e-10	-0.269035	0.942	0.848	1.08539e-05
UQCRFS1	5.99347e-10	-0.31304	0.935	0.875	1.15338e-05
PCSK9	6.46281e-10	0.260888	0.891	0.626	1.2437e-05
SSB	6.75172e-10	-0.466478	0.971	0.931	1.2993e-05
FARSB	7.08376e-10	-0.280402	0.826	0.718	1.3632e-05
PSMB1	7.19179e-10	-0.416662	0.964	0.919	1.38399e-05
ARID1A	7.72609e-10	0.256639	0.949	0.734	1.48681e-05
AIMP2	8.20871e-10	-0.275658	0.877	0.765	1.57968e-05
BUB3	8.25374e-10	-0.34234	0.92	0.873	1.58835e-05
DPYSL3	8.64965e-10	0.271242	0.986	0.875	1.66454e-05
ENY2	9.01764e-10	-0.323694	0.928	0.894	1.73535e-05
MRPS23	9.25304e-10	-0.314055	0.877	0.794	1.78066e-05
MCM6	9.38034e-10	-0.295421	0.877	0.774	1.80515e-05
IDI1	1.08197e-09	-0.386704	0.891	0.811	2.08214e-05
CORO2A	1.09071e-09	-0.255762	0.725	0.665	2.09897e-05
PNN	1.09768e-09	0.34454	1	0.85	2.11238e-05
MT-ND2	1.20349e-09	0.301471	0.986	0.82	2.31599e-05
IER3	1.25202e-09	-0.339548	0.601	0.646	2.40938e-05
ZFAND5	1.25783e-09	0.26387	0.949	0.785	2.42056e-05
ADH5	1.28476e-09	-0.290216	0.978	0.905	2.47239e-05
N4BP2L2	1.33997e-09	0.29501	0.942	0.739	2.57863e-05
NARS	1.4026e-09	-0.256434	0.957	0.868	2.69917e-05
C1QBP	1.43206e-09	-0.416429	0.964	0.931	2.75586e-05
NDUFC2	1.51439e-09	-0.344979	0.942	0.889	2.91429e-05
GSTO1	1.57676e-09	-0.300729	0.884	0.787	3.03432e-05
TOP1	1.77231e-09	-0.379827	0.942	0.871	3.41063e-05
KLHL7	1.92228e-09	-0.276277	0.862	0.762	3.69924e-05
TUBA1A	1.93696e-09	-0.53926	0.949	0.907	3.72749e-05
TRIM28	1.99025e-09	-0.353149	0.993	0.91	3.83004e-05
FKBP3	2.33125e-09	-0.388703	0.942	0.891	4.48625e-05
ROMO1	2.39548e-09	-0.316187	0.92	0.834	4.60987e-05
FBL	2.52326e-09	-0.274889	0.978	0.926	4.85576e-05
EIF4A1	2.62226e-09	-0.497394	1	0.991	5.04628e-05
MGST1	2.70114e-09	-0.319907	0.978	0.928	5.19808e-05
TRMT112	2.7168e-09	-0.372542	0.942	0.924	5.2282e-05
PRDX4	2.92984e-09	-0.266775	0.906	0.827	5.63819e-05
UBE2S	2.95053e-09	-0.310197	0.986	0.952	5.678e-05
HNRNPA2B1	3.06978e-09	-0.394231	1	0.981	5.90748e-05
GLTP	3.24549e-09	-0.290893	0.674	0.647	6.24561e-05
HMGN1	3.38493e-09	-0.295419	1	0.975	6.51396e-05
MT-CO1	3.4621e-09	0.253636	0.993	0.855	6.66246e-05
PSMB5	3.78269e-09	-0.279091	0.971	0.898	7.2794e-05
DBI	3.81351e-09	-0.311616	0.957	0.912	7.33872e-05
MRPL51	3.93607e-09	-0.257793	0.964	0.903	7.57457e-05
CYC1	4.07713e-09	-0.301158	0.913	0.866	7.84602e-05
MT1H	4.59087e-09	-0.317445	0.109	0.339	8.83467e-05
ZNF638	4.75194e-09	0.255254	0.942	0.732	9.14462e-05
S100A11	5.01281e-09	-0.451346	0.935	0.857	9.64666e-05
MRPL13	5.24467e-09	-0.289331	0.913	0.824	0.000100928
ZFP36L2	5.27581e-09	0.375171	0.913	0.748	0.000101528
DCAF13	5.73067e-09	-0.350786	0.928	0.825	0.000110281
DENR	6.43548e-09	-0.252356	0.92	0.85	0.000123844
EIF3M	6.53156e-09	-0.272696	0.964	0.878	0.000125693
ANP32E	6.85406e-09	-0.379709	0.957	0.922	0.0001319
MCM3	8.00189e-09	-0.279421	0.964	0.88	0.000153988
ATP5MPL	8.13656e-09	-0.251586	0.971	0.878	0.00015658
NQO1	8.57403e-09	-0.255058	0.681	0.704	0.000164999
PSMD2	8.94538e-09	-0.335467	0.949	0.862	0.000172145
SNRPD3	9.33991e-09	-0.346397	0.913	0.836	0.000179737
EEF1A1	9.56336e-09	0.319539	1	1	0.000184037
ATP5MC3	9.68473e-09	-0.369088	0.964	0.931	0.000186373
LDHA	9.83203e-09	-0.286752	0.986	0.933	0.000189208
CCNB1	9.94595e-09	-0.402732	0.935	0.862	0.0001914
RAN	1.01467e-08	-0.433796	0.971	0.988	0.000195263
LENG8	1.01812e-08	0.300291	0.87	0.626	0.000195928
DNAJA1	1.35623e-08	-0.429811	0.942	0.885	0.000260992
KDM5B	1.37894e-08	0.279627	0.949	0.804	0.000265363
TXNL1	1.49599e-08	-0.25925	0.92	0.836	0.000287889
PTMA	1.53839e-08	-0.26737	1	1	0.000296048
EXOSC3	1.60172e-08	-0.291733	0.855	0.764	0.000308235
TUBA4A	1.81375e-08	-0.278261	0.819	0.732	0.000349038
CHORDC1	1.83235e-08	-0.283284	0.899	0.813	0.000352617
SUPT16H	1.97409e-08	-0.273516	0.971	0.899	0.000379893
FASN	2.25817e-08	-0.346839	0.971	0.898	0.000434563
SNRPF	2.26954e-08	-0.394687	0.964	0.952	0.00043675
PUM3	2.28434e-08	-0.258481	0.877	0.776	0.000439599
RND3	2.49914e-08	-0.277294	0.514	0.63	0.000480935
TERF1	2.54074e-08	0.318708	0.986	0.966	0.000488941
MRFAP1	3.21669e-08	-0.284658	0.942	0.885	0.000619021
EIF6	3.26299e-08	-0.340484	0.891	0.831	0.00062793
MRPL19	3.74714e-08	-0.25394	0.884	0.788	0.0007211
TRIM27	3.87444e-08	-0.251832	0.862	0.75	0.000745597
CIRBP	3.96692e-08	0.254739	0.964	0.794	0.000763394
SNRPE	4.49941e-08	-0.333407	0.949	0.919	0.000865866
SUMO1	4.61314e-08	-0.319373	0.957	0.917	0.000887753
HNRNPH3	4.86541e-08	-0.270158	0.964	0.91	0.0009363
XRCC6	4.97197e-08	-0.314505	0.957	0.921	0.000956806
ABRACL	5.24271e-08	-0.295291	0.957	0.907	0.00100891
SRSF7	5.52624e-08	-0.351685	0.971	0.915	0.00106347
MRPL47	5.98224e-08	-0.28374	0.899	0.817	0.00115122
GADD45GIP1	6.99968e-08	-0.344426	0.928	0.908	0.00134702
RPL35	7.60852e-08	-0.32975	1	0.996	0.00146418
SNRPA1	7.65684e-08	-0.346144	0.913	0.864	0.00147348
APRT	7.73396e-08	-0.338465	0.971	0.94	0.00148832
EEF2	7.80177e-08	0.265459	1	0.993	0.00150137
SF3B6	8.09329e-08	-0.288324	0.942	0.873	0.00155747
TUBB2B	9.07518e-08	-0.382259	0.978	0.968	0.00174643
NDUFB10	9.16063e-08	-0.301014	0.957	0.907	0.00176287
APOE	9.73766e-08	0.484036	0.993	0.931	0.00187391
RDX	9.79608e-08	0.259585	0.949	0.776	0.00188516
SNRPB	1.0156e-07	-0.3407	0.964	0.947	0.00195442
CALM2	1.22833e-07	-0.345761	0.986	0.951	0.0023638
MT2A	1.42287e-07	-0.348361	0.29	0.48	0.00273817
LIN28A	1.46337e-07	0.298741	0.978	0.905	0.0028161
CSE1L	1.47846e-07	-0.259986	0.942	0.857	0.00284515
B3GNT7	1.49602e-07	-0.292853	0.725	0.672	0.00287894
PFDN2	1.80517e-07	-0.296904	0.92	0.852	0.00347388
SUB1	1.93448e-07	-0.283511	0.971	0.931	0.00372272
NDUFS6	2.00098e-07	-0.273794	0.971	0.924	0.00385069
BANF1	2.23372e-07	-0.290321	0.949	0.896	0.00429858
ATIC	2.42287e-07	-0.259304	0.92	0.825	0.00466257
B2M	2.47761e-07	0.250222	0.935	0.762	0.0047679
CCNA2	2.50686e-07	-0.293795	0.848	0.792	0.0048242
GAL	2.94893e-07	-0.292449	0.949	0.859	0.00567493
TKT	3.5231e-07	-0.313335	0.993	0.97	0.00677986
LMNB1	3.60496e-07	-0.293936	0.949	0.848	0.00693738
CLSPN	4.09873e-07	-0.265369	0.862	0.774	0.00788759
PHLDB2	4.51516e-07	-0.262437	0.558	0.631	0.00868897
POU3F1	5.03274e-07	-0.341017	0.587	0.644	0.00968501
MRPS9	5.98703e-07	-0.272274	0.913	0.82	0.0115214
MORF4L1	6.76032e-07	-0.256555	0.986	0.937	0.0130096
CLDN6	7.25303e-07	0.303562	0.957	0.861	0.0139577
EIF4A3	8.14242e-07	-0.344885	0.899	0.82	0.0156693
HSP90AA1	9.3761e-07	-0.459367	1	0.996	0.0180434
TMSB4X	1.05026e-06	0.259837	0.986	0.988	0.0202111
PRDX1	1.08901e-06	-0.434401	1	0.988	0.0209569
NDUFS3	1.13688e-06	-0.294872	0.884	0.81	0.0218782
PSMD4	1.25531e-06	-0.287978	0.92	0.852	0.0241572
PSMB3	1.46123e-06	-0.387399	0.913	0.877	0.0281199
CCT3	1.74407e-06	-0.250025	0.993	0.94	0.0335629
RBM8A	2.16516e-06	-0.256894	0.949	0.889	0.0416664
PSMA2	2.31346e-06	-0.287752	0.964	0.912	0.0445203
SNRNP40	2.64916e-06	-0.254885	0.891	0.811	0.0509805
SRP14	2.69764e-06	-0.296634	0.986	0.952	0.0519135
RTCB	2.97584e-06	-0.251085	0.92	0.82	0.057267
UBB	3.83179e-06	-0.316239	0.978	0.959	0.0737389
HSP90AB1	4.52222e-06	-0.385004	1	0.993	0.0870256
PSMA3	4.97343e-06	-0.345418	0.928	0.882	0.0957087
ATP5F1C	5.19543e-06	-0.284422	0.942	0.896	0.0999809
TMSB10	7.35074e-06	-0.291052	0.986	0.979	0.141458
MARCKSL1	9.63111e-06	-0.262777	0.986	0.961	0.185341
NME2	1.24581e-05	-0.294436	0.986	0.986	0.239744
NPM1	1.30585e-05	-0.339695	1	0.996	0.251298
SERBP1	1.46662e-05	-0.259715	0.993	0.982	0.282235
TACC3	1.77233e-05	-0.268805	0.855	0.795	0.341067
NASP	2.06373e-05	-0.340394	1	0.974	0.397144
TAGLN	2.17972e-05	-0.417505	0.877	0.772	0.419465
SKP1	2.41048e-05	-0.27699	0.957	0.905	0.463872
PSIP1	2.97387e-05	-0.25303	0.993	0.963	0.572291
AURKB	3.65987e-05	-0.281962	0.833	0.795	0.704305
BNIP3	4.02821e-05	0.260352	0.906	0.746	0.775189
ENO1	4.80445e-05	-0.327146	0.986	0.97	0.924568
CDC20	4.95835e-05	-0.331859	0.891	0.861	0.954185
SNRNP70	5.41539e-05	-0.302441	0.928	0.871	1
XRCC5	8.51383e-05	-0.289363	0.971	0.951	1
CKS2	9.14164e-05	-0.262821	0.949	0.899	1
KPNA2	0.000104466	-0.405798	0.957	0.915	1
CDK1	0.000689714	-0.324162	0.797	0.792	1
UBE2C	0.00114197	-0.3038	0.884	0.859	1
FABP7	0.00114225	-0.292251	0.652	0.624	1
LDHB	0.00185648	-0.290207	0.993	0.986	1
TUBB	0.00194725	-0.266144	0.986	0.995	1
UBC	0.00250658	-0.340232	0.964	0.926	1

## Sheet: iPS.merge.wt_vs_ko.markers
gene	type	avg_log2FC	pct.1	pct.2	p_val	p_val_adj
LMNB2	WT iPS	0.78509	0.981	0.594	6.76172e-74	1.30123e-69
IFITM1	WT iPS	0.326719	0.923	0.732	1.08768e-33	2.09314e-29
MAN2A1	WT iPS	0.307362	0.985	0.897	6.48428e-32	1.24784e-27
RPS9	WT iPS	0.281883	1	1	7.52017e-29	1.44718e-24
RPL3	WT iPS	0.273177	1	1	5.64903e-27	1.0871e-22
BNIP3	WT iPS	0.91474	0.981	0.964	2.32802e-21	4.48003e-17
ARF5	WT iPS	0.258392	0.977	0.987	6.68127e-21	1.28574e-16
TOMM20	WT iPS	0.256415	1	1	1.8937e-19	3.64423e-15
IGFBP2	WT iPS	0.477033	1	1	2.55602e-16	4.91881e-12
EIF4A2	WT iPS	0.27234	1	1	7.71642e-15	1.48495e-10
WSB1	WT iPS	0.274912	0.985	0.982	4.51059e-12	8.68017e-08
GAS5	WT iPS	0.287854	1	1	4.4554e-11	8.57398e-07
PNISR	WT iPS	0.259439	0.996	0.996	4.70574e-11	9.05573e-07
PGK1	WT iPS	0.480207	1	1	1.11621e-10	2.14804e-06
FAM162A	WT iPS	0.425823	0.989	0.987	5.24852e-10	1.01003e-05
CRABP2	WT iPS	0.346794	0.989	0.964	5.30205e-10	1.02033e-05
EIF3A	WT iPS	0.263622	1	1	6.46464e-10	1.24406e-05
C4orf3	WT iPS	0.291984	0.992	0.996	2.42908e-09	4.67452e-05
NPM1	WT iPS	0.275557	1	1	7.03697e-09	0.000135419
LDHA	WT iPS	0.465788	1	1	1.74683e-08	0.000336159
MALAT1	WT iPS	0.595172	0.992	0.996	2.30783e-07	0.00444119
ESRG	WT iPS	0.271592	0.996	1	7.18655e-07	0.0138298
CYBA	WT iPS	0.274343	0.992	0.978	9.01202e-07	0.0173427
MT-CO1	WT iPS	0.28327	0.989	0.996	3.36405e-06	0.0647379
AASS	WT iPS	0.278668	0.989	0.991	7.55931e-06	0.145471
DDIT4	WT iPS	0.418518	0.931	0.92	1.22236e-05	0.23523
VIM	WT iPS	0.364036	0.962	0.938	3.86229e-05	0.743258
CKS2	WT iPS	0.257965	0.992	1	0.000416923	1
RPS10	KO iPS	0.405238	1	0.996	1.46846e-45	2.8259e-41
HBD	KO iPS	0.590728	1	0.989	6.13306e-33	1.18025e-28
PKIB	KO iPS	0.495244	1	0.977	8.04466e-32	1.54811e-27
ATP6V0C	KO iPS	0.256187	1	1	2.59509e-27	4.994e-23
MT-ND3	KO iPS	0.600065	0.991	0.989	6.85747e-26	1.31965e-21
RPS21	KO iPS	0.273025	1	1	1.2813e-24	2.46574e-20
MT-ATP8	KO iPS	0.337976	0.982	0.981	2.18953e-24	4.21353e-20
MT-ND4L	KO iPS	0.396352	0.982	0.992	8.7656e-22	1.68685e-17
RPS29	KO iPS	0.259635	1	1	3.20037e-21	6.15879e-17
RPL36	KO iPS	0.261534	1	1	6.80784e-21	1.3101e-16
EIF3J	KO iPS	0.273819	0.996	0.981	2.4524e-20	4.71939e-16
EIF2S2	KO iPS	0.305401	1	1	3.04198e-20	5.85399e-16
ATP5ME	KO iPS	0.330061	1	1	4.31992e-20	8.31325e-16
RPL41	KO iPS	0.266964	1	1	7.42375e-20	1.42863e-15
SLC1A5	KO iPS	0.31791	1	0.992	3.13058e-19	6.02449e-15
POLR2L	KO iPS	0.317265	1	0.992	1.3971e-18	2.68859e-14
SLC7A5	KO iPS	0.471393	0.982	0.923	1.54314e-18	2.96961e-14
SLC7A11	KO iPS	0.261652	0.915	0.797	5.7887e-18	1.11398e-13
RPL39	KO iPS	0.33445	1	1	4.96249e-17	9.54981e-13
RPS27	KO iPS	0.277474	1	1	1.39222e-16	2.67918e-12
RPL38	KO iPS	0.251298	1	1	5.03145e-16	9.68252e-12
ATP5MD	KO iPS	0.266256	1	1	1.89139e-15	3.63979e-11
TMA7	KO iPS	0.330924	1	1	1.42419e-14	2.74072e-10
DPYSL2	KO iPS	0.271501	1	1	6.88177e-14	1.32433e-09
COPS9	KO iPS	0.253307	0.996	0.996	9.18735e-14	1.76801e-09
SNRPB2	KO iPS	0.250087	1	0.996	8.01472e-12	1.54235e-07
DHCR24	KO iPS	0.432733	0.991	0.989	9.09825e-12	1.75087e-07
MT-ND2	KO iPS	0.321701	0.991	0.989	1.87471e-11	3.6077e-07
PSAT1	KO iPS	0.301795	0.996	1	1.99539e-11	3.83992e-07
ATP5F1E	KO iPS	0.275793	1	1	2.75848e-11	5.30842e-07
APOC1	KO iPS	0.302287	1	0.989	9.60399e-11	1.84819e-06
TOMM7	KO iPS	0.266342	1	1	1.12583e-10	2.16654e-06
RPS28	KO iPS	0.261036	1	1	7.80863e-10	1.50269e-05
ATF4	KO iPS	0.253958	1	1	1.82914e-09	3.51999e-05
ACLY	KO iPS	0.35549	1	0.996	2.5682e-09	4.94225e-05
ACSS2	KO iPS	0.284665	0.848	0.739	5.73393e-09	0.000110344
TAGLN	KO iPS	0.406105	0.991	0.943	2.52117e-08	0.000485175
SCD	KO iPS	0.484544	0.991	0.996	2.85282e-08	0.000548996
RPS26	KO iPS	0.280101	1	1	1.12128e-07	0.00215779
HMGCS1	KO iPS	0.676805	0.982	0.985	1.65512e-07	0.00318512
FDFT1	KO iPS	0.339211	0.996	0.996	3.83835e-07	0.00738651
PEG10	KO iPS	0.254865	0.996	0.977	6.03624e-07	0.0116161
TOMM5	KO iPS	0.256945	1	0.989	6.20104e-07	0.0119333
SEPHS1	KO iPS	0.263343	1	1	7.73426e-07	0.0148838
MVD	KO iPS	0.338293	0.978	0.935	1.19736e-06	0.023042
ACAT2	KO iPS	0.414386	1	0.973	2.82274e-06	0.0543208
TUBA1A	KO iPS	0.331611	1	0.992	6.15951e-06	0.118534
FADS2	KO iPS	0.250079	0.987	0.992	6.96203e-06	0.133977
HMGCR	KO iPS	0.274487	0.973	0.989	0.000153187	1
ERG28	KO iPS	0.25553	0.987	0.958	0.00232418	1
