# Supplementary material for: Single-cell transcriptomic profiling reveals specific maturation signatures in human cardiomyocytes derived from LMNB2-inactivated induced pluripotent stem cells
Source: Front Cell Dev Biol. 2022 Nov 28;10:895162. doi: 10.3389/fcell.2022.895162 (PMC9742441; doi:10.3389/fcell.2022.895162)
Supplement: Supplementary file 6 [file Table5.XLSX]

## Sheet: CM.traj.diff.3clusters
gene_short_name	cluster	pval	qval
A2M	1	5.01385e-13	2.33861e-12
ABI3	3	7.12852e-19	4.40358e-18
ABRA	1	1.8538e-33	1.87935e-32
ABRACL	2	2.49826e-149	1.3489e-147
AC018647.1	1	7.95111e-30	7.26241e-29
AC022075.1	2	7.74117e-68	1.60291e-66
AC022126.1	3	3.74767e-32	3.65179e-31
AC027031.2	2	1.68019e-48	2.38895e-47
AC068587.4	1	1.14088e-06	3.39241e-06
AC092807.3	2	5.04027e-70	1.08857e-68
AC107068.2	1	1.0509e-45	1.4208e-44
AC107294.2	1	2.64153e-51	3.97792e-50
AC108134.2	2	4.09863e-11	1.70107e-10
AC124067.2	2	1.21055e-89	3.44814e-88
ACAT2	2	1.23947e-56	2.05518e-55
ACOT7	2	5.26703e-30	4.82891e-29
ACSM3	3	1.6362e-80	4.09939e-79
ACTA1	1	4.63543e-51	6.94379e-50
ACTA2	2	8.55872e-298	9.73526e-296
ACTB	2	0	0
ACTC1	1	0	0
ACTG1	2	0	0
ACTG2	2	0	0
ACTN1	2	6.97558e-191	5.00073e-189
ACTN2	1	0	0
ACTN4	2	1.24993e-56	2.07051e-55
ADAM12	3	5.8871e-86	1.58432e-84
ADAMTS1	3	2.0701e-08	7.10809e-08
ADAMTS12	1	6.86152e-11	2.81219e-10
ADAMTS20	3	6.58404e-07	2.00387e-06
ADAMTS5	3	5.10184e-22	3.54573e-21
ADAMTS6	1	6.95187e-23	5.02384e-22
ADAMTS9	1	8.07481e-14	3.95784e-13
ADAMTSL4	1	7.28413e-57	1.21726e-55
ADCY5	1	1.27145e-195	9.47313e-194
ADGRA2	2	1.73351e-82	4.4746e-81
ADGRF4	3	1.71052e-23	1.2667e-22
ADGRG1	2	2.08671e-45	2.80563e-44
ADGRG6	2	7.38134e-67	1.49751e-65
ADGRL4	3	1.50189e-34	1.5721e-33
ADPRHL1	1	0	0
AFAP1	2	2.68026e-20	1.7555e-19
AFAP1L2	3	4.01904e-19	2.4981e-18
AHNAK	2	3.16652e-47	4.41038e-46
AHNAK2	1	4.27761e-83	1.11427e-81
AIF1	3	2.65534e-19	1.6681e-18
AIF1L	1	7.51232e-37	8.4215e-36
AKAP12	2	0	0
AKR1B1	1	1.61678e-08	5.59431e-08
AKR1C1	2	6.51257e-08	2.15553e-07
AL121827.2	3	1.41756e-23	1.05296e-22
AL136171.2	1	0	0
AL391844.1	1	1.66004e-15	8.90121e-15
AL627171.2	2	5.02246e-19	3.11612e-18
ALCAM	1	7.49207e-18	4.42777e-17
ALKAL2	3	3.09484e-19	1.93777e-18
ALOX5AP	3	2.62923e-99	8.24632e-98
ALPL	2	2.24096e-07	7.09111e-07
ALX1	2	1.32248e-13	6.39391e-13
AMIGO2	3	4.02606e-25	3.17287e-24
ANGPT1	1	4.71253e-14	2.34076e-13
ANGPTL1	2	1.69557e-22	1.20541e-21
ANGPTL4	3	2.5655e-30	2.37379e-29
ANK3	1	7.80943e-52	1.18862e-50
ANKRD1	1	3.42532e-42	4.3291e-41
ANO4	3	5.3912e-16	2.95486e-15
ANOS1	2	1.15825e-13	5.6286e-13
ANXA1	2	0	0
ANXA2	2	3.04547e-290	3.44118e-288
ANXA5	2	8.90182e-261	8.93429e-259
AP1M2	2	9.68266e-31	9.05732e-30
AP1S1	2	8.49297e-111	3.12974e-109
APCDD1	1	3.03594e-27	2.55672e-26
APELA	2	6.07876e-12	2.66143e-11
APLP1	2	1.17443e-19	7.50493e-19
APOA1	1	1.36009e-08	4.73204e-08
APOC1	2	5.69474e-23	4.1276e-22
AQP3	2	2.61353e-13	1.24212e-12
AREG	3	4.13077e-58	7.09761e-57
ARF4	2	8.49418e-137	4.129e-135
ARHGAP11A	3	5.12907e-16	2.8139e-15
ARHGAP18	2	1.03265e-67	2.13306e-66
ARHGDIB	3	8.64985e-77	2.05263e-75
ARHGEF40	2	2.57758e-36	2.841e-35
ARID5A	2	1.5959e-21	1.08917e-20
ARID5B	2	2.29265e-172	1.46506e-170
ARL4C	2	4.11912e-10	1.61342e-09
ARL4D	2	1.17737e-93	3.46948e-92
ARL6IP1	2	1.44236e-210	1.16633e-208
ARPC1B	2	1.39426e-164	8.5265e-163
ARPC3	2	2.52159e-145	1.31973e-143
ARPC5	2	8.21223e-118	3.34408e-116
ARSI	2	6.22605e-110	2.26985e-108
ARSJ	3	7.52866e-105	2.53862e-103
ART5	1	4.98919e-09	1.80198e-08
ASB2	1	0	0
ASF1B	3	3.31424e-21	2.2404e-20
ASPHD1	2	3.38363e-56	5.54044e-55
ASPM	3	2.29272e-31	2.18051e-30
ATF3	2	2.73887e-86	7.44118e-85
ATP10D	2	3.59385e-36	3.9433e-35
ATP1A3	1	1.82639e-54	2.89878e-53
ATP2B1	2	1.68688e-253	1.66367e-251
ATP2C1	2	4.21039e-40	5.0131e-39
AURKB	3	4.03785e-61	7.31357e-60
AUXG01000058.1	2	2.77575e-158	1.62749e-156
AXL	2	3.2989e-105	1.12123e-103
B2M	3	1.48133e-52	2.27698e-51
BAALC	2	1.71408e-35	1.84399e-34
BAG3	1	1.18854e-08	4.15549e-08
BAMBI	3	4.56412e-47	6.34145e-46
BANCR	1	6.0475e-176	3.98388e-174
BASP1	2	4.7601e-196	3.57784e-194
BATF3	3	6.68255e-20	4.31395e-19
BAX	2	3.15333e-96	9.62472e-95
BAZ1A	2	7.81216e-47	1.08015e-45
BCAR3	2	3.61087e-38	4.16557e-37
BCAT1	2	1.05994e-81	2.6992e-80
BDNF	2	1.20044e-169	7.55791e-168
BEX1	2	5.34265e-40	6.34814e-39
BGN	3	7.79877e-58	1.32665e-56
BHLHE40	3	3.45238e-12	1.53397e-11
BHLHE41	2	8.43448e-18	4.97267e-17
BIN1	2	1.90207e-195	1.41101e-193
BLM	3	4.47291e-16	2.46263e-15
BLVRB	2	5.80452e-30	5.31598e-29
BMP1	2	4.51315e-66	9.00625e-65
BMP10	1	3.76691e-40	4.50392e-39
BMP2	1	9.36153e-14	4.57145e-13
BMP4	2	9.70196e-25	7.53116e-24
BMP5	1	1.39412e-80	3.49801e-79
BMP6	3	3.91633e-12	1.73469e-11
BMP7	1	0	0
BNC1	2	4.00153e-39	4.66991e-38
BRCA1	3	9.45703e-09	3.33036e-08
BRCA2	3	3.15469e-23	2.31109e-22
BRIP1	3	3.28725e-09	1.20384e-08
BSCL2	2	7.74064e-32	7.45742e-31
BST2	2	0	0
BUB1	3	5.48748e-08	1.82759e-07
BUB1B	3	3.27017e-18	1.96395e-17
C11orf96	2	9.26385e-10	3.52576e-09
C12orf75	1	3.43307e-12	1.52579e-11
C15orf48	3	9.97067e-28	8.50172e-27
C16orf74	3	1.82997e-17	1.06563e-16
C19orf48	2	1.58698e-54	2.52115e-53
C1orf105	1	1.71638e-213	1.40793e-211
C1orf21	2	1.12873e-48	1.60755e-47
C3orf70	2	3.19631e-13	1.51026e-12
C5orf30	2	8.56643e-14	4.19158e-13
C6orf141	3	3.12394e-20	2.04139e-19
C7	1	3.90219e-54	6.17618e-53
CACNA1D	1	7.16623e-115	2.81729e-113
CACNG4	3	3.40246e-22	2.37823e-21
CACYBP	2	1.14136e-56	1.89619e-55
CADM1	2	1.17139e-20	7.7798e-20
CALB2	1	1.96894e-50	2.92886e-49
CALCA	2	2.55321e-17	1.47771e-16
CALCRL	3	1.62017e-08	5.60376e-08
CALD1	2	0	0
CALM1	2	1.05818e-185	7.4299e-184
CALN1	2	2.63473e-06	7.55525e-06
CALR	2	2.34813e-154	1.33546e-152
CAMK2N1	2	2.08714e-85	5.58162e-84
CAMTA2	2	3.28931e-11	1.37252e-10
CAP1	2	1.76396e-300	2.01991e-298
CAPG	2	1.13539e-56	1.88812e-55
CAPN2	2	1.62052e-59	2.85339e-58
CARD10	3	2.17392e-19	1.37376e-18
CARD11	2	1.27894e-51	1.93967e-50
CARD16	3	3.58384e-14	1.79318e-13
CARMN	1	7.66709e-18	4.52964e-17
CASC15	3	1.057e-41	1.31927e-40
CASP4	2	6.12739e-36	6.6845e-35
CASQ2	1	3.47687e-25	2.7515e-24
CAV1	3	1.12209e-08	3.92881e-08
CAV2	2	1.53823e-10	6.18992e-10
CAVIN1	1	8.15383e-08	2.67591e-07
CAVIN3	1	1.53452e-08	5.32153e-08
CCDC178	2	1.74105e-08	6.00967e-08
CCDC184	3	2.24527e-49	3.26033e-48
CCDC3	3	4.26167e-97	1.3125e-95
CCDC80	2	1.34277e-127	6.02902e-126
CCDC85B	2	5.70082e-22	3.95718e-21
CCL2	2	1.11401e-32	1.10765e-31
CCN1	2	0	0
CCN2	2	0	0
CCN4	3	1.65734e-39	1.94883e-38
CCNA2	3	1.34833e-47	1.89033e-46
CCNB1	3	7.14855e-107	2.48915e-105
CCNB2	3	4.74205e-42	5.97113e-41
CCND1	3	3.89985e-15	2.05115e-14
CCND2	2	4.35275e-26	3.54664e-25
CCNG2	2	1.57654e-32	1.55485e-31
CCPG1	2	2.87149e-82	7.37851e-81
CCSAP	2	9.19793e-23	6.61615e-22
CD200	2	5.31157e-54	8.37578e-53
CD248	3	5.85523e-88	1.63238e-86
CD40	3	6.28499e-24	4.72399e-23
CD44	2	8.90006e-116	3.55627e-114
CD55	2	5.55822e-23	4.03207e-22
CD59	3	1.16661e-15	6.30093e-15
CD9	2	6.40497e-105	2.16828e-103
CDC20	3	1.98118e-82	5.10617e-81
CDC25C	3	9.83647e-25	7.6321e-24
CDC42EP1	2	7.52987e-229	6.69139e-227
CDC42EP5	2	1.78334e-52	2.73874e-51
CDC45	3	1.98126e-33	2.00381e-32
CDC6	2	1.95594e-52	3.00111e-51
CDCA2	3	1.04395e-07	3.39466e-07
CDCA3	3	2.23386e-07	7.06995e-07
CDCA5	3	2.34971e-28	2.05173e-27
CDCA7	3	6.93858e-08	2.29253e-07
CDCA8	3	2.68874e-28	2.34297e-27
CDCP1	3	2.63254e-37	2.97854e-36
CDH1	3	3.40204e-60	6.05904e-59
CDH11	2	3.4937e-113	1.33954e-111
CDH13	2	7.36482e-68	1.52869e-66
CDH3	1	1.33394e-20	8.84903e-20
CDH6	2	1.85854e-11	7.89801e-11
CDK1	3	1.88324e-140	9.34065e-139
CDK2AP2	2	2.81651e-61	5.15063e-60
CDKN1A	3	6.41238e-12	2.80174e-11
CDKN1C	2	2.64509e-10	1.04955e-09
CDKN2A	3	1.03718e-42	1.3226e-41
CDKN2B	3	0	0
CDKN2B-AS1	3	2.98723e-36	3.28403e-35
CDKN3	3	1.64393e-06	4.81357e-06
CDT1	3	3.39691e-48	4.80581e-47
CEBPD	1	1.87997e-13	9.00508e-13
CEND1	1	2.09129e-25	1.66425e-24
CENPA	3	2.60195e-31	2.46773e-30
CENPE	3	1.61813e-37	1.84549e-36
CENPF	3	4.0495e-129	1.85235e-127
CENPH	2	2.54222e-17	1.47235e-16
CENPK	2	4.84697e-23	3.52661e-22
CENPM	2	1.06064e-12	4.85297e-12
CENPU	3	5.49766e-25	4.30478e-24
CENPV	2	2.1268e-63	4.06811e-62
CENPW	2	5.8733e-59	1.02674e-57
CEP55	3	3.28563e-30	3.02697e-29
CERCAM	2	2.05047e-20	1.34974e-19
CFI	3	3.53652e-43	4.55741e-42
CHAF1A	2	1.20447e-13	5.84325e-13
CHEK1	3	7.87871e-18	4.64983e-17
CHRM2	1	3.52675e-15	1.86007e-14
CHRM3	2	3.04176e-10	1.20136e-09
CHRNA3	2	2.38602e-10	9.48737e-10
CIT	3	1.81736e-07	5.78827e-07
CKAP2L	3	1.18727e-27	1.00983e-26
CKAP4	2	9.80366e-41	1.19308e-39
CKM	1	0	0
CKS1B	2	1.7188e-66	3.46644e-65
CKS2	2	7.80171e-122	3.30304e-120
CLDN1	2	1.66255e-67	3.4259e-66
CLDN11	2	1.25746e-22	8.98819e-22
CLDN4	3	1.60078e-120	6.67785e-119
CLDN6	1	8.48156e-24	6.34425e-23
CLDN7	3	3.26549e-67	6.68858e-66
CLIC1	2	0	0
CLMN	2	2.73264e-44	3.60311e-43
CLMP	2	4.14217e-56	6.776e-55
CLSPN	3	1.16162e-53	1.82333e-52
CLSTN2	1	3.80491e-38	4.38053e-37
CLTA	2	0	1.8527e-306
CLU	2	1.44729e-101	4.65041e-100
CMTM3	2	1.01136e-87	2.80128e-86
CMTM6	2	3.4275e-74	7.9134e-73
CMTM7	2	1.76795e-48	2.51163e-47
CMYA5	1	5.56576e-305	6.50432e-303
CNN2	2	2.9792e-92	8.64476e-91
CNN3	2	5.58045e-113	2.13483e-111
CNRIP1	2	2.70878e-75	6.29663e-74
CNTN5	2	5.75255e-09	2.06806e-08
CNTNAP2	3	2.68433e-09	9.89417e-09
COL11A1	3	9.60769e-52	1.45972e-50
COL12A1	2	8.66537e-13	3.99051e-12
COL1A1	2	0	0
COL1A2	2	0	0
COL25A1	3	1.15337e-122	4.93204e-121
COL2A1	1	0	0
COL3A1	2	0	0
COL4A1	3	1.54208e-26	1.27045e-25
COL5A1	2	2.96865e-188	2.11047e-186
COL5A2	3	1.89621e-35	2.03479e-34
COL6A2	2	1.16741e-139	5.77345e-138
COL6A3	3	7.13767e-56	1.16316e-54
COL8A1	3	5.82343e-69	1.2389e-67
COL9A3	2	7.41031e-29	6.59545e-28
COMT	2	8.78956e-51	1.3132e-49
CORIN	1	0	0
CORO1B	2	2.22163e-105	7.58109e-104
CORO2A	2	3.8618e-53	6.00091e-52
COTL1	2	0	0
COX6A2	1	1.56814e-117	6.34018e-116
COX7A1	1	1.66851e-14	8.48526e-14
CPA4	2	1.69262e-26	1.39178e-25
CPE	2	3.52903e-19	2.20154e-18
CPNE2	2	5.0032e-102	1.61675e-100
CPXM2	2	1.03727e-06	3.10053e-06
CRABP1	3	9.80091e-20	6.28658e-19
CRABP2	2	1.83973e-104	6.16688e-103
CRB3	3	2.91478e-11	1.22072e-10
CREB3L1	2	3.0623e-70	6.63057e-69
CREB5	2	9.24495e-51	1.38003e-49
CRELD2	2	1.39515e-41	1.73247e-40
CRHBP	3	1.39418e-30	1.30129e-29
CRIM1	2	1.3609e-248	1.28998e-246
CRIM1-DT	2	5.32367e-118	2.17303e-116
CRIP1	1	1.30543e-262	1.34176e-260
CRISPLD2	3	1.2878e-17	7.54288e-17
CRMP1	2	3.32977e-09	1.21915e-08
CRTAP	2	1.6476e-41	2.04298e-40
CRYAB	1	0	0
CSPG5	2	3.5913e-09	1.31266e-08
CSRP1	2	8.29726e-130	3.84695e-128
CSRP2	2	9.28455e-52	1.41188e-50
CSRP3	1	0	0
CST5	3	2.94409e-06	8.40002e-06
CTH	2	2.23933e-23	1.64901e-22
CTHRC1	2	5.10572e-32	4.95247e-31
CTSB	3	8.14637e-13	3.75455e-12
CTSL	2	1.51731e-21	1.03595e-20
CTSV	1	4.24797e-16	2.34484e-15
CXCL12	3	8.92822e-11	3.63524e-10
CXCL14	2	9.35219e-41	1.13977e-39
CXCL16	2	2.08042e-09	7.71318e-09
CXCR4	2	3.06817e-06	8.72632e-06
CXXC5	2	5.03555e-24	3.7949e-23
CYBA	3	1.90033e-10	7.60934e-10
CYBRD1	2	1.12909e-52	1.73868e-51
CYGB	3	1.00562e-21	6.90739e-21
CYP1B1	3	3.40323e-120	1.41624e-118
CYTL1	2	5.80296e-12	2.54394e-11
CYTOR	2	1.73465e-203	1.3639e-201
CYYR1	2	6.52851e-37	7.34274e-36
DAB2	2	2.44978e-105	8.34294e-104
DBF4	2	4.56518e-13	2.13517e-12
DCBLD1	3	2.52375e-31	2.3949e-30
DCN	3	9.37948e-123	4.02092e-121
DCX	2	9.50146e-14	4.63712e-13
DDAH1	2	4.99064e-19	3.0975e-18
DDAH2	2	3.83874e-103	1.26198e-101
DDIT3	2	3.24172e-49	4.67542e-48
DDIT4	2	7.04635e-47	9.75059e-46
DDR2	2	7.89095e-99	2.46134e-97
DEPDC1	3	2.30812e-20	1.51524e-19
DEPDC1B	3	4.71305e-13	2.20192e-12
DEPP1	2	7.19422e-08	2.37331e-07
DERL3	1	2.38144e-10	9.47358e-10
DGKI	1	4.65241e-14	2.31157e-13
DGUOK	2	4.21198e-67	8.59627e-66
DHRS2	3	1.19964e-24	9.27421e-24
DIAPH3	3	4.72117e-17	2.70311e-16
DKK1	2	0	0
DLC1	3	4.83488e-12	2.13104e-11
DLGAP5	3	1.7695e-18	1.0748e-17
DLK1	2	0	0
DLX2	3	9.02365e-27	7.49569e-26
DNAJA1	2	2.50949e-53	3.9138e-52
DNAJB1	2	7.63392e-126	3.39193e-124
DNAJB11	2	6.1914e-46	8.42406e-45
DNAJB9	2	1.02732e-09	3.89342e-09
DNAJC1	2	4.17483e-62	7.78481e-61
DNAJC15	1	1.27355e-08	4.44179e-08
DNAJC3	2	2.26623e-35	2.42727e-34
DNAJC9	2	5.44231e-53	8.4262e-52
DNER	3	3.25601e-06	9.24206e-06
DNM3OS	3	2.07885e-22	1.47054e-21
DPP10-AS1	2	4.34545e-18	2.59874e-17
DPP4	3	2.07139e-11	8.76324e-11
DPPA4	2	1.06274e-46	1.46348e-45
DPYSL2	2	2.09688e-40	2.5195e-39
DSC2	2	1.46005e-26	1.20461e-25
DSC3	2	4.38494e-157	2.5106e-155
DSCC1	3	2.37414e-17	1.37687e-16
DSEL	2	2.96399e-19	1.85856e-18
DTD1	2	1.2978e-61	2.39643e-60
DTL	3	1.07567e-08	3.76938e-08
DTYMK	2	4.33671e-46	5.90999e-45
DUSP1	2	1.67388e-170	1.0617e-168
DUSP13	1	7.92392e-15	4.10686e-14
DUSP23	2	8.57675e-21	5.71851e-20
DUSP4	2	1.84731e-61	3.39277e-60
DUSP5	1	1.15829e-21	7.94959e-21
DYNLT3	2	1.6253e-24	1.25139e-23
EBNA1BP2	2	5.42231e-93	1.58689e-91
EBPL	2	4.01533e-61	7.28051e-60
ECM1	3	3.86952e-40	4.62014e-39
ECSCR	3	5.5523e-41	6.78605e-40
ECT2	3	3.84596e-08	1.29735e-07
EDIL3	2	6.70365e-188	4.74596e-186
EDN1	2	0	0
EDNRB	2	1.96932e-15	1.05166e-14
EFEMP1	2	1.6046e-35	1.72839e-34
EFHD2	2	9.55719e-22	6.57785e-21
EFNA5	2	1.41902e-65	2.80874e-64
EFNB2	2	3.90696e-125	1.71364e-123
EFS	2	1.88135e-21	1.28193e-20
EGFL6	2	1.58572e-10	6.37352e-10
EGFL7	2	6.46792e-88	1.80025e-86
EGFR	2	2.71419e-67	5.56605e-66
EGR1	3	2.35608e-14	1.19071e-13
EHD2	2	5.73892e-88	1.60258e-86
EIF2AK4	2	5.32824e-48	7.50086e-47
EIF5A	2	1.92042e-89	5.46103e-88
ELK3	2	2.20397e-93	6.48347e-92
ELL2	2	1.25671e-17	7.36331e-17
ELOVL1	2	5.51708e-74	1.26863e-72
ELOVL2	2	1.7291e-19	1.09754e-18
EMILIN1	3	9.37052e-89	2.63393e-87
EMILIN2	1	8.35089e-118	3.39245e-116
EMP2	1	0	0
EMP3	2	2.82269e-232	2.54819e-230
ENAH	2	1.56419e-153	8.86652e-152
ENC1	2	0	0
ENDOD1	2	1.10953e-62	2.08719e-61
ENG	3	1.41983e-123	6.14851e-122
EPAS1	3	3.07445e-86	8.3264e-85
EPB41L2	2	1.1909e-65	2.35995e-64
EPCAM	2	4.07286e-32	3.96639e-31
EPHA2	2	6.28437e-12	2.74722e-11
EPHA3	3	5.22415e-07	1.60305e-06
EPHB1	3	1.3591e-09	5.10319e-09
EPHB2	3	7.50045e-29	6.67219e-28
EPHB6	2	3.01674e-34	3.12897e-33
EPPK1	2	2.43555e-21	1.6523e-20
EPS8	2	3.05054e-22	2.13663e-21
EPS8L2	2	3.65908e-24	2.77349e-23
ERAP2	2	3.4861e-14	1.74479e-13
ERBB3	2	5.46403e-07	1.67404e-06
ERG28	2	1.14295e-80	2.88051e-79
ERRFI1	2	4.39972e-76	1.03542e-74
ESAM	3	8.16454e-45	1.08492e-43
ESCO2	3	1.06423e-13	5.18206e-13
ESRP1	1	1.82582e-14	9.27425e-14
ETS1	2	2.11444e-164	1.28845e-162
ETV4	2	9.88449e-54	1.55437e-52
ETV5	2	4.53847e-21	3.05465e-20
EVA1A	2	1.19774e-95	3.63626e-94
EVA1B	2	0	0
EXOC3L2	3	1.44891e-25	1.16117e-24
EXPH5	2	9.16023e-13	4.21272e-12
F2R	2	9.20168e-176	6.03843e-174
F2RL1	3	1.71613e-107	6.02481e-106
F2RL2	2	2.8893e-36	3.18047e-35
FABP5	2	2.41119e-159	1.42352e-157
FAM107B	2	3.05783e-81	7.74076e-80
FAM111A	3	3.36741e-22	2.3547e-21
FAM114A1	2	1.87075e-122	7.97969e-121
FAM189A2	1	1.38314e-307	1.66191e-305
FAM43A	2	1.72381e-28	1.51295e-27
FAM78A	1	0	0
FAM83D	3	2.29357e-12	1.02792e-11
FAM89A	2	3.4423e-50	5.06752e-49
FAM89B	2	5.64844e-63	1.06844e-61
FANCD2	3	3.35714e-16	1.86033e-15
FANCI	3	3.59946e-09	1.31536e-08
FAR2	3	1.00806e-37	1.15201e-36
FAT3	2	1.71864e-10	6.89639e-10
FBLN1	2	4.98662e-306	5.86771e-304
FBLN2	2	5.40823e-80	1.34512e-78
FBN1	2	0	0
FBN2	1	0	0
FBXL22	1	3.30411e-176	2.19357e-174
FBXO2	2	1.04901e-15	5.68019e-15
FBXO32	1	5.68586e-163	3.44015e-161
FCGRT	2	8.55827e-83	2.2158e-81
FEN1	2	6.32042e-32	6.10294e-31
FEZ1	2	9.82148e-08	3.20409e-07
FGD5	3	7.99339e-18	4.71588e-17
FGF1	1	5.91436e-09	2.12354e-08
FGF12	1	3.26317e-157	1.88733e-155
FGF18	1	4.1181e-40	4.90663e-39
FGF2	2	2.00395e-21	1.36384e-20
FGF5	3	4.12568e-16	2.27807e-15
FHL1	2	2.00033e-212	1.63299e-210
FHL2	1	2.61725e-13	1.24354e-12
FHL3	2	1.14031e-229	1.01864e-227
FILIP1L	2	8.83314552681131e-312	0
FITM1	1	0	0
FJX1	2	2.55301e-113	9.81071e-112
FKBP14	2	1.07063e-40	1.30015e-39
FKBP1B	2	4.93786e-25	3.87177e-24
FKBP7	2	2.59171e-67	5.32127e-66
FLI1	3	2.74907e-34	2.8583e-33
FLNA	2	0	0
FLNB	2	0	0
FLNC	1	1.14076e-108	4.09761e-107
FLRT2	2	2.31442e-100	7.38104e-99
FLRT3	2	7.52291e-21	5.03357e-20
FLT1	2	2.81116e-22	1.97383e-21
FN1	2	0	0
FNBP1L	2	4.14625e-63	7.89546e-62
FOS	2	2.19071e-10	8.73518e-10
FOSL1	2	1.49301e-35	1.61518e-34
FOSL2	2	5.01368e-21	3.36785e-20
FOXC1	2	2.33195e-126	1.03884e-124
FOXC2	3	1.27761e-148	6.85488e-147
FOXD1	2	9.2479e-12	4.0045e-11
FOXM1	3	1.13789e-06	3.38411e-06
FOXP2	3	3.15888e-49	4.56365e-48
FOXS1	2	5.40808e-31	5.0895e-30
FRMD3	1	0	0
FRMD4A	2	1.95319e-41	2.41488e-40
FRMD6	3	2.4864e-94	7.4166e-93
FRZB	2	8.49505e-148	4.51534e-146
FSCN1	2	6.56054e-55	1.04907e-53
FSTL1	3	3.97414e-19	2.47109e-18
FSTL3	2	1.365e-15	7.34688e-15
FTH1	2	1.47484e-148	7.88831e-147
FTL	2	0	0
FUT8	3	2.34354e-09	8.66614e-09
FXYD1	1	1.03967e-184	7.21089e-183
FXYD5	2	0	0
FZD1	2	1.33523e-57	2.25561e-56
FZD2	2	3.08144e-64	5.97449e-63
G0S2	1	2.36112e-08	8.06999e-08
G6PD	2	1.7142e-113	6.60217e-112
GABRB2	1	2.53162e-34	2.63703e-33
GABRG3	3	3.30745e-24	2.51142e-23
GABRP	3	5.62156e-26	4.56087e-25
GADD45A	2	1.60884e-68	3.38889e-67
GADD45B	2	1.73513e-41	2.14995e-40
GAL	2	2.03428e-95	6.15407e-94
GALE	2	1.42422e-22	1.01589e-21
GALNT3	3	9.72044e-15	5.01968e-14
GALNT6	2	6.23668e-43	7.98876e-42
GAP43	2	6.30265e-22	4.3696e-21
GAS1	3	1.74412e-18	1.05976e-17
GAS5	2	1.01259e-104	3.40764e-103
GATA2	2	2.15024e-24	1.64739e-23
GATA3	3	5.76962e-79	1.39633e-77
GBP1	3	7.76882e-15	4.0277e-14
GBP2	2	4.33894e-43	5.57883e-42
GBP4	3	8.89776e-20	5.71802e-19
GCLM	2	1.76338e-51	2.66963e-50
GCNT1	3	2.00154e-19	1.2667e-18
GDF15	2	1.75871e-140	8.74845e-139
GDF6	2	1.50303e-58	2.60617e-57
GDF7	3	3.49991e-11	1.45754e-10
GDNF	3	8.00001e-12	3.48027e-11
GEM	2	1.44847e-26	1.19563e-25
GFOD1	1	1.62156e-16	9.113e-16
GFRA1	2	9.08559e-20	5.83434e-19
GGH	2	1.36918e-34	1.43406e-33
GHRH	1	1.16828e-69	2.51048e-68
GINS2	3	8.34674e-23	6.01403e-22
GINS4	3	1.40322e-33	1.42766e-32
GJA1	3	4.86289e-07	1.49658e-06
GJA5	1	2.5945e-24	1.97976e-23
GJD2	1	2.54699e-07	8.0312e-07
GLA	2	5.5811e-48	7.85035e-47
GLIPR1	3	2.88666e-141	1.44434e-139
GLIPR2	2	6.70037e-88	1.86192e-86
GLRX	1	9.87386e-35	1.03928e-33
GMDS	2	2.46307e-45	3.30384e-44
GMFG	3	4.64096e-09	1.68083e-08
GNAI1	2	8.86242e-25	6.88573e-24
GNAI2	2	2.476e-83	6.45957e-82
GNG11	3	9.32376e-205	7.36491e-203
GNG2	2	5.11189e-66	1.01773e-64
GOLM1	2	5.87021e-42	7.36995e-41
GOLT1B	2	2.01221e-44	2.6573e-43
GPC3	2	4.56902e-255	4.53236e-253
GPC4	3	3.35467e-13	1.58202e-12
GPM6B	2	3.93367e-27	3.3046e-26
GPR158	2	6.33658e-43	8.10455e-42
GPR176	2	3.07779e-34	3.19036e-33
GPR22	1	2.59312e-12	1.15943e-11
GPRC5A	3	9.29539e-09	3.27614e-08
GPRIN3	1	3.34977e-152	1.85564e-150
GPSM3	3	3.09375e-49	4.47335e-48
GPX3	1	1.50271e-57	2.53352e-56
GREM1	3	7.54159e-53	1.16342e-51
GRIA4	2	5.8839e-77	1.40016e-75
GRIN2A	3	3.03929e-15	1.60745e-14
GSTO1	2	3.61683e-27	3.04441e-26
GSTP1	2	6.56873e-142	3.30607e-140
GTSE1	3	1.09223e-41	1.36126e-40
GUCY1A1	1	7.04807e-40	8.35099e-39
GULP1	2	1.44167e-57	2.43301e-56
GYPC	2	6.2032e-71	1.3604e-69
H19	2	3.29968e-14	1.65528e-13
H1F0	2	3.5945e-14	1.79799e-13
H2AFJ	2	9.76081e-18	5.74074e-17
H2AFX	2	2.29159e-73	5.22019e-72
H2AFZ	2	5.97655e-161	3.56545e-159
H3F3B	2	0	0
HABP4	2	5.83397e-17	3.3313e-16
HAND2-AS1	1	3.09696e-112	1.16903e-110
HAPLN1	3	0	0
HAPLN3	2	5.56546e-35	5.90167e-34
HAS2	3	6.04325e-52	9.23098e-51
HBEGF	2	1.61965e-78	3.89219e-77
HCRT	1	9.00006e-18	5.30245e-17
HECW2	3	4.21471e-29	3.77487e-28
HELLPAR	3	7.58495e-07	2.29377e-06
HELLS	2	2.45853e-17	1.42533e-16
HES1	2	1.85657e-06	5.40652e-06
HES4	2	3.01759e-61	5.50066e-60
HES6	2	4.5597e-93	1.33673e-91
HEXB	2	2.00376e-72	4.52223e-71
HEY1	2	2.84104e-123	1.22718e-121
HEY2	1	5.10048e-13	2.37707e-12
HEYL	2	4.61371e-17	2.64602e-16
HHIP	1	2.96789e-12	1.32387e-11
HIC1	3	1.37446e-32	1.35948e-31
HIST1H1B	3	1.41821e-11	6.07368e-11
HIST1H4C	3	1.09038e-22	7.81027e-22
HIVEP3	2	2.78196e-36	3.06429e-35
HJURP	3	1.66412e-15	8.91749e-15
HKDC1	2	9.58511e-10	3.64072e-09
HLA-A	2	2.52818e-101	8.09301e-100
HLA-B	2	2.78377e-152	1.55218e-150
HLA-C	2	3.39252e-143	1.72786e-141
HLA-E	2	5.17553e-100	1.64441e-98
HLX	3	3.817e-76	9.00769e-75
HMGA1	2	9.57919e-218	8.01177e-216
HMGA2	3	8.61936e-88	2.39128e-86
HMGB1	3	3.69405e-61	6.71223e-60
HMGB2	2	3.84294e-08	1.29658e-07
HMGCR	2	2.52681e-44	3.33429e-43
HMGN1	2	3.05244e-125	1.34576e-123
HMGN2	2	3.06749e-30	2.82906e-29
HMMR	3	4.29299e-20	2.79036e-19
HMOX1	2	7.00168e-290	7.85938e-288
HOPX	1	8.88565e-08	2.90825e-07
HOTAIRM1	2	2.74901e-77	6.55995e-76
HOXA2	3	7.33203e-34	7.49545e-33
HOXA3	2	1.01994e-69	2.19448e-68
HOXA4	3	1.73485e-62	3.24919e-61
HOXA5	2	1.26304e-57	2.13577e-56
HOXA7	2	6.13122e-14	3.02519e-13
HOXB-AS3	3	1.63685e-49	2.38089e-48
HOXB2	2	5.05179e-79	1.22958e-77
HOXB4	2	9.76751e-42	1.22001e-40
HOXB5	2	2.08707e-79	5.10897e-78
HOXB6	2	1.85754e-77	4.43883e-76
HOXB7	2	1.19679e-66	2.41651e-65
HOXB8	3	1.73242e-19	1.09924e-18
HOXB9	2	1.13809e-86	3.10689e-85
HOXC6	2	7.21319e-34	7.38281e-33
HOXC8	2	3.99029e-38	4.58159e-37
HOXD-AS2	2	4.99489e-20	3.23795e-19
HRC	1	0	0
HS3ST1	3	8.21618e-10	3.13822e-09
HS3ST3A1	2	1.14906e-15	6.21009e-15
HS3ST3B1	3	1.97897e-23	1.46296e-22
HSBP1L1	2	9.95988e-22	6.84672e-21
HSD17B11	2	1.46222e-41	1.81443e-40
HSP90AA1	2	2.2422e-57	3.76539e-56
HSP90B1	2	5.43619e-69	1.15796e-67
HSPA1B	2	1.70974e-236	1.55998e-234
HSPA5	2	5.74553e-144	2.95272e-142
HSPA6	2	0	0
HSPB2	1	1.18417e-32	1.17535e-31
HSPB3	1	1.57374730169812e-319	2.09775579600558e-317
HSPG2	1	1.04651e-91	3.01106e-90
HSPH1	2	1.6507e-23	1.224e-22
HYI	2	3.04992e-47	4.25145e-46
ICAM1	3	2.08128e-24	1.59671e-23
ID1	2	1.81457e-143	9.29737e-142
ID2	1	8.33514e-30	7.60097e-29
ID3	2	0	0
ID4	2	1.07675e-19	6.8936e-19
IER2	2	1.59846e-162	9.63706e-161
IER3	2	1.28706e-21	8.80859e-21
IER5L	2	3.93852e-14	1.96488e-13
IFFO2	2	1.34514e-09	5.05192e-09
IFI16	2	5.08009e-219	4.29091e-217
IFITM2	2	5.64482e-60	1.00325e-58
IFITM3	2	3.9198e-228	3.44741e-226
IGF2	2	5.87065e-31	5.5157e-30
IGF2-AS	2	8.38699e-25	6.53419e-24
IGFBP2	1	6.59563e-22	4.57086e-21
IGFBP3	2	0	0
IGFBP4	3	4.12107e-53	6.39797e-52
IGFBP5	3	0	0
IGFBP6	3	1.332e-09	5.00363e-09
IGFBP7	2	0	0
IGLON5	2	6.42054e-49	9.17481e-48
IKBIP	2	1.13232e-61	2.09768e-60
IL11	2	8.92945e-74	2.04228e-72
IL13RA1	2	1.08631e-33	1.10654e-32
IL32	3	2.01752e-289	2.24987e-287
IL6ST	2	1.83365e-65	3.61686e-64
IL7R	3	6.14824e-40	7.30002e-39
INAVA	3	8.04713e-23	5.80305e-22
INHBA	3	1.85043e-241	1.72525e-239
INKA1	2	2.09427e-112	7.94055e-111
IQGAP1	2	4.57396e-223	3.94146e-221
IRAK1	2	3.50833e-26	2.86682e-25
IRF6	3	1.83502e-09	6.83009e-09
IRS2	2	8.01471e-09	2.83649e-08
IRX2	1	1.39671e-46	1.91873e-45
IRX3	1	9.41964e-44	1.22873e-42
IRX4	1	2.38688e-173	1.54848e-171
ISG15	3	3.58128e-08	1.20998e-07
ISL1	1	1.48149e-19	9.42827e-19
ITGA1	2	0	0
ITGA11	3	7.42724e-37	8.33159e-36
ITGA2	3	2.16819e-152	1.21291e-150
ITGA3	2	5.05719e-57	8.46769e-56
ITGA4	3	9.99516e-47	1.37864e-45
ITGA8	2	3.17727e-147	1.68356e-145
ITGAV	2	6.13304e-26	4.96639e-25
ITGB1	2	1.71637e-59	3.01904e-58
ITGB4	3	3.00909e-09	1.10482e-08
ITGB8	3	6.85762e-45	9.11963e-44
ITIH3	3	9.06304e-18	5.33587e-17
ITM2A	3	1.56327e-33	1.58765e-32
ITM2C	2	1.16849e-86	3.1848e-85
ITPR1	2	1.81577e-08	6.25493e-08
ITPR2	2	1.25651e-44	1.66061e-43
ITPR3	3	3.03934e-56	4.98627e-55
ITPRID2	3	5.3778e-84	1.40515e-82
IVNS1ABP	1	1.03038e-14	5.30326e-14
JADE1	2	1.02674e-15	5.56133e-15
JAG1	3	2.28279e-06	6.59593e-06
JPH1	1	2.1864e-39	2.56917e-38
JPH4	2	3.26988e-68	6.82872e-67
JPT1	2	8.50166e-61	1.52851e-59
JUN	2	6.71154e-128	3.02943e-126
JUNB	2	1.30538e-108	4.67907e-107
KCNE4	3	4.69741e-58	8.03884e-57
KCNG1	2	2.27747e-239	2.11185e-237
KCNIP2	1	1.74921e-58	3.02688e-57
KCNK1	2	5.81503e-19	3.60131e-18
KCNK6	2	4.10031e-48	5.78656e-47
KCNMA1	2	1.87104e-288	2.07297e-286
KCNQ2	2	1.52684e-68	3.22013e-67
KCNS3	2	4.19949e-28	3.6353e-27
KDELR3	2	6.17034e-59	1.07757e-57
KDR	3	4.68516e-17	2.68339e-16
KIF11	3	5.64148e-30	5.16944e-29
KIF14	3	5.69028e-14	2.81006e-13
KIF18A	3	5.89879e-11	2.42752e-10
KIF18B	3	1.07603e-12	4.91941e-12
KIF1A	2	1.06198e-06	3.16997e-06
KIF20B	2	1.53338e-27	1.30097e-26
KIF22	2	4.20857e-21	2.83821e-20
KIF23	3	8.02384e-16	4.3711e-15
KIF2C	3	6.74575e-26	5.45737e-25
KIF4A	3	5.44158e-17	3.1114e-16
KIF5C	2	9.12082e-22	6.28258e-21
KIFC1	3	1.03431e-08	3.63189e-08
KIFC3	2	1.91549e-34	2.00012e-33
KIRREL1	2	2.50434e-41	3.08736e-40
KIT	3	3.63586e-26	2.96676e-25
KITLG	2	1.83028e-11	7.77984e-11
KLF4	2	6.09235e-28	5.2393e-27
KLF5	2	1.9343e-14	9.8165e-14
KLF6	2	1.80857e-135	8.69234e-134
KLK6	3	1.95185e-28	1.70782e-27
KNSTRN	2	1.46487e-18	8.92629e-18
KPNA2	2	3.39581e-64	6.56164e-63
KRT18	2	5.48412866883784e-322	7.42630072263978e-320
KRT19	2	4.11664e-107	1.43931e-105
KRT7	3	0	0
KRT8	2	1.47976e-185	1.03474e-183
KRT81	3	1.38537e-13	6.68473e-13
L1CAM	2	5.78619e-35	6.12812e-34
L1TD1	3	2.20294e-28	1.92554e-27
LAMA1	1	4.5361e-14	2.25641e-13
LAMA4	1	4.02662e-116	1.61273e-114
LAMB1	3	4.56176e-26	3.71163e-25
LAMB3	3	3.75011e-08	1.26601e-07
LAMC2	3	1.90402e-32	1.87026e-31
LAMP5	2	5.49157e-16	3.0089e-15
LARP6	2	5.78798e-82	1.48503e-80
LASP1	2	2.32505e-228	2.05544e-226
LAYN	3	6.724e-56	1.0968e-54
LBH	1	1.59738e-161	9.56298e-160
LBX2-AS1	2	6.63053e-10	2.55142e-09
LCP1	3	7.19639e-68	1.49555e-66
LDB2	2	3.18252e-16	1.76643e-15
LDHA	2	1.2386e-31	1.18791e-30
LEFTY2	1	3.44083e-46	4.69284e-45
LGALS1	2	6.56669e-106	2.24982e-104
LGALS3BP	3	7.40035e-15	3.839e-14
LGI2	1	5.46814e-64	1.05421e-62
LHFPL6	2	2.55299e-17	1.47771e-16
LHX1	2	1.16873e-13	5.67306e-13
LHX1-DT	2	3.66993e-12	1.62889e-11
LHX2	2	1.30536e-101	4.21021e-100
LIF	3	1.33527e-12	6.06235e-12
LIMA1	2	0	0
LIMCH1	2	3.10888e-64	6.02085e-63
LIMD2	2	9.28688e-195	6.82986e-193
LIMS1	2	2.7725e-145	1.44662e-143
LINC00632	2	1.78435e-20	1.17592e-19
LINC00881	1	3.88599e-130	1.80662e-128
LINC01405	1	8.48334e-173	5.44145e-171
LINC01503	2	3.59744e-11	1.49743e-10
LINC01638	3	1.20637e-69	2.58906e-68
LINC02381	2	9.39356e-152	5.17009e-150
LINC02802	2	6.12348e-108	2.16312e-106
LIPA	2	1.60436e-236	1.4717e-234
LIPG	2	1.52215e-14	7.76411e-14
LIPH	3	1.24908e-14	6.39799e-14
LITAF	2	2.00897e-96	6.16492e-95
LIX1	1	2.73956e-18	1.64993e-17
LMCD1	3	2.51397e-70	5.45716e-69
LMNB1	3	1.06157e-08	3.72608e-08
LMNB2	2	7.96513e-20	5.13027e-19
LMO2	2	3.75957e-85	1.00071e-83
LMOD2	1	3.49242e-270	3.6334e-268
LOX	2	1.23444e-242	1.16364e-240
LOXL1	2	1.55614e-99	4.90774e-98
LOXL2	3	1.45588e-16	8.1981e-16
LPAR1	3	1.62056e-46	2.2191e-45
LPAR6	3	2.15979e-21	1.46814e-20
LPCAT1	2	7.73667e-46	1.05014e-44
LPCAT2	3	2.39234e-32	2.34183e-31
LRAT	1	1.30027e-54	2.07144e-53
LRIG3	2	1.70047e-45	2.29174e-44
LRRC10	1	9.8080020383266e-315	1.25822654720318e-312
LRRC17	2	3.4979e-19	2.18293e-18
LRRC49	1	2.07567e-166	1.29252e-164
LRRC4C	3	3.62139e-11	1.50666e-10
LRRC75A	2	1.8148e-26	1.49081e-25
LRRC8A	2	9.35757e-36	1.01564e-34
LRRN1	2	5.18199e-58	8.85923e-57
LRRN3	3	1.93856e-06	5.63279e-06
LRRTM1	3	2.1989e-21	1.49413e-20
LSAMP	2	8.74254e-39	1.0168e-37
LSM5	2	2.53621e-42	3.2197e-41
LSM8	2	2.96494e-71	6.53589e-70
LSR	2	4.71331e-25	3.70081e-24
LTBP2	3	1.23573e-07	3.99243e-07
LUCAT1	1	1.05495e-07	3.42849e-07
LUM	3	0	0
LURAP1L	2	1.06655e-103	3.54035e-102
LY6E	2	9.6745e-63	1.82394e-61
LYL1	3	1.22654e-25	9.83882e-25
LYPD1	3	5.1311e-30	4.70935e-29
MAB21L2	3	8.18807e-119	3.36638e-117
MAD2L1	2	7.42308e-80	1.84356e-78
MAFB	2	2.12285e-07	6.73111e-07
MAFF	2	4.2247e-53	6.5529e-52
MAL2	2	9.30034e-100	2.93856e-98
MAMLD1	3	8.84588e-10	3.37346e-09
MAN2A1	2	4.27072e-23	3.11798e-22
MANF	2	1.40694e-81	3.5722e-80
MAOA	3	5.20511e-09	1.87687e-08
MAP1LC3A	2	2.23014e-75	5.19817e-74
MAP2	2	2.00556e-56	3.30299e-55
MAP3K7CL	3	8.35801e-12	3.62769e-11
2022-03-04	3	1.01394e-66	2.05462e-65
MARCKS	2	0	0
MARCKSL1	2	3.16217e-181	2.13253e-179
MASP1	1	4.60488104638277e-317	5.95215760849677e-315
MASTL	3	6.45431e-15	3.35538e-14
MATN2	1	1.6676e-14	8.4832e-14
MB	1	0	0
MBP	3	2.45349e-21	1.66381e-20
MCHR1	2	2.16484e-12	9.70989e-12
MCM10	3	7.72932e-33	7.71214e-32
MCM5	3	3.27137e-08	1.10922e-07
MCM7	2	2.46302e-37	2.7923e-36
MCUB	2	6.01073e-35	6.36198e-34
MDFI	2	1.89173e-79	4.64413e-78
MED10	2	2.34514e-65	4.60977e-64
MEF2C	1	7.98953e-151	4.38319e-149
MEIS3	2	7.25152e-94	2.14429e-92
MELK	3	4.65684e-29	4.1665e-28
MELTF	2	1.53357e-18	9.33161e-18
MEST	2	0	0
METTL7A	2	1.01647e-17	5.97621e-17
MFAP2	2	5.88541e-178	3.95342e-176
MFAP4	2	1.56099e-46	2.13924e-45
MFGE8	2	1.14167e-104	3.83449e-103
MGARP	2	1.15546e-23	8.60517e-23
MGLL	2	1.05879e-19	6.78376e-19
MGST1	2	8.02957e-08	2.63665e-07
MIA	2	3.39369e-09	1.24176e-08
MID1	1	6.07129e-15	3.16204e-14
MIR133A1HG	1	2.71603e-203	2.12573e-201
MIR181A1HG	3	7.8237e-32	7.53318e-31
MIR4435-2HG	2	1.07917e-55	1.75192e-54
MIR503HG	2	2.77332e-63	5.29882e-62
MIS18A	2	4.10719e-34	4.23425e-33
MIS18BP1	2	5.67184e-15	2.95761e-14
MKI67	3	1.55083e-62	2.91413e-61
MME	3	1.60317e-102	5.21015e-101
MMP10	3	1.91659e-11	8.13251e-11
MMP14	2	1.23704e-164	7.59222e-163
MMP16	2	6.90855e-95	2.07159e-93
MMP2	3	0	0
MMP23B	2	1.19075e-120	4.97957e-119
MMP28	3	4.874e-10	1.8956e-09
MMP9	3	5.4578e-235	4.95324e-233
MMRN2	3	2.94643e-22	2.0654e-21
MN1	2	2.643e-35	2.82549e-34
MND1	3	1.09733e-22	7.85673e-22
MOXD1	2	1.37984e-13	6.65993e-13
MRPL18	2	1.33242e-16	7.51528e-16
MSN	2	2.07983e-68	4.37021e-67
MSX1	2	1.8892e-18	1.1471e-17
MT2A	3	2.19162e-149	1.18709e-147
MTCL1	2	2.60888e-10	1.03542e-09
MTRNR2L8	1	0	0
MTX1	2	5.94894e-85	1.57855e-83
MVD	2	5.22468e-15	2.73111e-14
MXD4	2	6.11451e-26	4.95374e-25
MXRA5	2	9.43156e-24	7.03942e-23
MXRA8	2	2.99117e-131	1.40593e-129
MYBL2	3	1.51913e-47	2.12803e-46
MYC	2	1.51277e-113	5.8528e-112
MYDGF	2	7.54673e-198	5.69744e-196
MYH10	3	4.83609e-42	6.08505e-41
MYH11	1	3.07441e-33	3.0929e-32
MYH6	1	0	0
MYH7	1	0	0
MYH7B	1	0	0
MYH9	2	9.33868e-194	6.83848e-192
MYL12A	2	2.41131e-88	6.76673e-87
MYL12B	2	3.25667e-162	1.95653e-160
MYL2	1	1.54199e-24	1.18886e-23
MYL3	1	0	0
MYL7	1	0	0
MYLK	2	5.26998e-164	3.19987e-162
MYLK3	1	0	0
MYO10	2	4.22919e-61	7.65201e-60
MYO1D	2	3.06225e-10	1.20889e-09
MYOCD	1	7.85349e-230	7.05243e-228
MYOF	2	6.42468e-15	3.34201e-14
MYRF	2	4.24549e-49	6.11278e-48
MYZAP	1	1.19909e-248	1.14295e-246
NABP1	3	9.17046e-21	6.10958e-20
NANS	2	3.89383e-47	5.41455e-46
NAV1	1	0	0
NAV2	1	8.79789e-129	4.01363e-127
NAV2-AS2	1	2.15604e-104	7.21302e-103
NBL1	3	3.31816e-45	4.44035e-44
NCAPD2	3	1.48425e-06	4.36324e-06
NCAPG	3	1.51594e-20	1.00329e-19
NCAPG2	3	8.7768e-08	2.87372e-07
NCAPH	3	2.57902e-29	2.3233e-28
NCCRP1	2	8.11508e-22	5.59659e-21
NCF2	3	2.20769e-25	1.75607e-24
NDC80	3	7.06015e-42	8.83787e-41
NDRG1	2	5.10079e-26	4.1423e-25
NEAT1	2	1.93087e-56	3.18613e-55
NECAP2	2	1.73646e-70	3.77901e-69
NECTIN3-AS1	3	1.14586e-09	4.32346e-09
NEDD9	2	4.10668e-10	1.60891e-09
NEFH	2	1.00584e-12	4.61458e-12
NEFL	1	3.88924e-17	2.24032e-16
NEFM	2	1.36758e-30	1.27716e-29
NEIL3	3	7.08928e-10	2.7212e-09
NEK2	3	3.77386e-15	1.98672e-14
NEK6	2	9.46798e-34	9.66742e-33
NENF	2	4.69142e-58	8.03664e-57
NET1	2	1.10113e-56	1.83472e-55
NETO2	2	2.02997e-15	1.08245e-14
NEU1	2	3.71559e-80	9.29552e-79
NFASC	1	1.39993e-30	1.30594e-29
NFE2L3	3	1.02921e-66	2.08308e-65
NFKBIA	2	5.61506e-14	2.77533e-13
NFKBIZ	3	3.71378e-13	1.7451e-12
NGF	2	1.01854e-43	1.32659e-42
NGFR	2	2.47566e-11	1.04218e-10
NIBAN1	2	4.62469e-13	2.16182e-12
NKAIN4	3	4.302e-103	1.40884e-101
NKD1	3	6.07513e-13	2.81745e-12
NMRK2	1	2.9955e-43	3.86897e-42
NMU	2	1.26413e-14	6.47317e-14
NNMT	3	2.38901e-226	2.09033e-224
NOTCH3	2	1.0781e-63	2.0738e-62
NOTCH4	3	8.68189e-17	4.92783e-16
NPM1	2	7.25169e-242	6.79826e-240
NPNT	1	1.91396e-10	7.66034e-10
NPPA	1	0	0
NPPB	1	1.81822e-283	1.96345e-281
NPR1	3	2.05976e-32	2.02091e-31
NPR3	3	8.24438e-11	3.36601e-10
NPW	2	6.78184e-13	3.13582e-12
NPY	3	3.5727e-143	1.81421e-141
NQO1	2	7.73068e-173	4.97739e-171
NR2F1	2	1.86903e-25	1.49086e-24
NR2F1-AS1	3	1.09748e-19	7.02109e-19
NR2F2	3	1.93821e-07	6.16514e-07
NR4A2	3	1.63584e-23	1.21351e-22
NRGN	3	1.64119e-08	5.67415e-08
NRIP3	2	2.46471e-06	7.09273e-06
NRK	3	1.19361e-24	9.23183e-24
NRP1	1	6.01671e-18	3.56572e-17
NRP2	2	2.57494e-38	2.97855e-37
NRXN3	2	8.82383e-41	1.07614e-39
NSG1	2	1.47271e-32	1.45497e-31
NT5E	2	4.36651e-14	2.17332e-13
NTM	2	8.22235e-128	3.70158e-126
NTRK2	2	3.38268e-108	1.2024e-106
NTS	3	1.37333e-51	2.08097e-50
NUAK1	3	7.14605e-13	3.30065e-12
NUAK2	2	1.8345e-35	1.9698e-34
NUCB2	2	1.26751e-61	2.34304e-60
NUDT1	2	1.9505e-18	1.18348e-17
NUF2	3	8.18434e-42	1.02376e-40
NUP62CL	2	2.1589e-29	1.94895e-28
NUSAP1	3	5.01557e-43	6.43911e-42
OCIAD2	2	3.30349e-153	1.86636e-151
OCLN	2	2.25712e-12	1.01212e-11
ODAPH	3	9.46468e-17	5.36856e-16
OGFRL1	2	1.97661e-36	2.18709e-35
OIP5	3	4.45552e-12	1.96739e-11
OLFM2	2	1.76341e-45	2.37282e-44
OLFML3	2	2.6325e-47	3.67559e-46
OPTN	2	7.64933e-26	6.17667e-25
ORC6	2	3.48636e-31	3.29188e-30
OSGIN1	2	5.93265e-28	5.10453e-27
OSMR	3	4.68358e-37	5.27815e-36
OSR1	1	4.87802e-09	1.76369e-08
OSTC	2	6.90785e-158	4.03636e-156
OXTR	2	1.67072e-07	5.33517e-07
P3H1	2	1.82616e-149	9.92292e-148
P3H3	2	1.57881e-103	5.21037e-102
P4HA1	2	3.75712e-29	3.37035e-28
P4HA2	2	1.43576e-97	4.43787e-96
PAM	1	7.56377e-158	4.40454e-156
PAPPA	3	0	6.02493e-307
PARPBP	3	4.94382e-15	2.59065e-14
PBK	3	3.14216e-19	1.96595e-18
PCDH1	3	1.34465e-38	1.56071e-37
PCDH10	2	1.92284e-115	7.61193e-114
PCDH11X	3	5.13222e-10	1.99194e-09
PCDH17	2	9.40988e-14	4.59374e-13
PCDH18	2	2.56589e-106	8.88016e-105
PCDH8	3	3.82851e-12	1.69712e-11
PCLAF	3	3.49235e-50	5.13677e-49
PCNA	2	3.41113e-23	2.49788e-22
PCOLCE	3	2.16391e-36	2.39278e-35
PCSK5	2	3.30047e-14	1.65528e-13
PCSK9	2	5.40992e-17	3.09433e-16
PDE3A	2	2.42192e-32	2.36943e-31
PDGFB	2	1.01732e-32	1.01269e-31
PDGFC	3	6.9919e-43	8.92933e-42
PDGFRB	2	2.6937e-119	1.11553e-117
PDIA3	2	1.56153e-137	7.63407e-136
PDIA4	2	5.20236e-79	1.26263e-77
PDIA6	2	3.08302e-119	1.27367e-117
PDLIM2	2	1.18809e-86	3.23305e-85
PDLIM3	2	3.67865e-131	1.71959e-129
PDLIM4	2	2.28472e-55	3.67753e-54
PDLIM7	2	1.89976e-79	4.65714e-78
PEAR1	3	6.75602e-32	6.51249e-31
PEG10	2	3.48139e-125	1.53091e-123
PELO	2	1.43577e-60	2.56783e-59
PENK	3	3.92578e-28	3.40354e-27
PFN1	2	1.05849e-65	2.10244e-64
PFN2	2	1.21973e-60	2.18374e-59
PGAM2	1	0	0
PGLS	2	1.56024e-113	6.0228e-112
PGRMC1	2	5.19216e-128	2.34983e-126
PHACTR1	1	2.10188e-41	2.59683e-40
PHF19	2	6.58726e-31	6.18217e-30
PHLDA1	2	1.10021e-303	1.26836e-301
PHLDA2	2	0	0
PHLDA3	2	1.36185e-108	4.87124e-107
PHLDB2	2	3.08396e-68	6.44835e-67
PID1	2	3.19573e-21	2.16199e-20
PIEZO2	2	1.43498e-110	5.26529e-109
PIF1	3	6.36175e-08	2.10888e-07
PIMREG	3	4.61745e-07	1.42439e-06
PITPNM1	2	6.31539e-09	2.2604e-08
PITX1	2	2.05529e-11	8.70113e-11
PITX2	2	2.30124e-45	3.09163e-44
PKMYT1	3	1.76286e-07	5.61994e-07
PKP3	3	1.30225e-13	6.2997e-13
PLAC9	3	1.27368e-34	1.33568e-33
PLAGL1	2	1.06634e-24	8.26617e-24
PLAT	2	0	0
PLAU	3	3.80363e-169	2.38594e-167
PLAUR	3	1.14738e-78	2.76506e-77
PLCXD3	1	1.56059e-87	4.30855e-86
PLEKHN1	2	7.93098e-07	2.39586e-06
PLIN2	2	5.73488e-14	2.83127e-13
PLK1	3	4.83917e-29	4.32736e-28
PLK2	2	3.92944e-261	3.99072e-259
PLK4	3	5.12707e-09	1.85021e-08
PLN	1	0	0
PLP2	2	7.54852e-10	2.89097e-09
PLPP2	3	1.83231e-51	2.76908e-50
PLPP4	3	1.2495e-71	2.7687e-70
PLS3	2	1.94495e-68	4.09183e-67
PLTP	2	7.76745e-104	2.5834e-102
PLXDC2	3	1.86849e-33	1.89312e-32
PLXNA4	1	1.08294e-60	1.94292e-59
PLXND1	2	4.96848e-50	7.29537e-49
PMAIP1	2	5.06716e-139	2.49152e-137
PMEL	1	4.03022e-69	8.61699e-68
PMEPA1	2	1.26946e-06	3.75643e-06
PNP	2	9.82803e-69	2.08305e-67
POC1A	3	2.1591e-15	1.14905e-14
PODXL	3	2.70822e-60	4.83343e-59
POGLUT3	2	8.9175e-44	1.16501e-42
POSTN	2	0	0
POU2F2	3	5.8943e-27	4.92983e-26
POU5F1	2	4.29543e-41	5.26878e-40
PPARG	2	9.67626e-45	1.2828e-43
PPIB	2	2.38936e-192	1.72743e-190
PPME1	2	3.07964e-08	1.04588e-07
PPP1R14A	2	2.12072e-42	2.69625e-41
PPP1R14B	2	4.02438e-30	3.70157e-29
PPP1R15A	2	1.93497e-64	3.76019e-63
PPP1R18	2	5.68954e-74	1.30477e-72
PPP1R1A	1	0	0
PPP1R3A	1	3.25782e-41	4.00757e-40
PPP1R3C	1	1.76133e-71	3.89777e-70
PRAG1	2	2.98591e-56	4.90333e-55
PRC1	3	7.49734e-35	7.91582e-34
PRCP	3	2.54518e-06	7.31445e-06
PRKCB	2	1.68464e-19	1.07052e-18
PRNP	2	1.67534e-26	1.37824e-25
PROCR	2	5.42595e-63	1.02864e-61
PRR11	3	2.80492e-08	9.54858e-08
PRR15	3	6.59988e-60	1.17177e-58
PRR16	2	6.94356e-28	5.95631e-27
PRR5L	3	7.53888e-10	2.88793e-09
PRRX1	3	1.46718e-06	4.31603e-06
PRRX2	2	3.09296e-28	2.69108e-27
PRSS23	2	1.24811357518062e-318	1.63810108129871e-316
PRSS35	1	1.35769e-30	1.26862e-29
PRSS8	2	8.1149e-09	2.87016e-08
PRTG	2	2.0834e-16	1.16701e-15
PRUNE2	1	1.07459e-06	3.20537e-06
PSMC3IP	2	1.07767e-24	8.34825e-24
PSRC1	3	1.15333e-09	4.34972e-09
PTBP1	2	3.35188e-106	1.15302e-104
PTCHD1	2	2.98595e-06	8.50949e-06
PTGER3	1	4.61363e-20	2.99307e-19
PTGER4	3	1.8277e-43	2.36782e-42
PTGIS	3	1.93098e-33	1.95528e-32
PTGR1	2	3.00423e-64	5.83142e-63
PTHLH	3	3.90827e-25	3.08432e-24
PTK7	2	1.54132e-78	3.70917e-77
PTMA	2	0	0
PTN	3	5.0471e-22	3.51054e-21
PTPN14	3	1.7235e-19	1.0944e-18
PTPRF	2	1.92876e-75	4.50184e-74
PTPRH	2	1.32892e-34	1.39275e-33
PTPRN	2	8.36763e-33	8.33928e-32
PTPRZ1	2	8.42445e-29	7.47467e-28
PTTG1	1	3.05591e-13	1.44592e-12
PTX3	3	1.1101e-183	7.60665e-182
PXDC1	2	1.00064e-86	2.74045e-85
PXDN	3	5.52063e-18	3.27856e-17
PYCARD	3	3.82871e-44	5.02891e-43
PYGM	1	1.72129e-148	9.17772e-147
QPCT	2	1.47393e-26	1.21548e-25
QSOX1	2	1.45248e-81	3.68235e-80
RAB13	2	9.3213e-108	3.28595e-106
RAB25	3	8.99965e-48	1.26276e-46
RAB27B	2	9.38695e-08	3.06761e-07
RAB31	2	2.2836e-16	1.2758e-15
RAB32	2	0	0
RAB33A	2	4.43494e-72	9.95644e-71
RAB34	2	1.07029e-108	3.85261e-107
RAB3B	3	1.94056e-28	1.69881e-27
RAB3C	3	4.83159e-32	4.69456e-31
RAB5C	2	2.7294e-109	9.9083e-108
RAC2	3	8.46656e-30	7.71669e-29
RACGAP1	3	1.35364e-10	5.46775e-10
RAD51	3	9.12766e-15	4.72071e-14
RAD51AP1	3	1.59179e-28	1.39851e-27
RAI14	3	3.78272e-34	3.90446e-33
RAMP1	3	1.6915e-11	7.20068e-11
RAMP2	2	5.94681e-275	6.26323e-273
RANBP1	2	1.50074e-101	4.81308e-100
RAP1B	2	2.93621e-112	1.11081e-110
RAP1GAP2	2	7.12778e-07	2.16126e-06
RAP2B	2	1.54483e-35	1.66717e-34
RARRES2	3	2.27714e-20	1.49548e-19
RASD1	1	2.00869e-06	5.82961e-06
RASSF1	2	1.28477e-15	6.92818e-15
RBM3	2	5.00765e-57	8.39298e-56
RBM47	2	4.64592e-14	2.3097e-13
RBP7	2	2.12163e-15	1.12946e-14
RCN2	2	7.0206e-122	2.97974e-120
RCOR2	1	1.08348e-09	4.09623e-09
RECQL	2	3.68529e-55	5.91518e-54
RELB	2	1.18449e-41	1.47195e-40
RELN	1	1.09879e-94	3.28906e-93
REXO2	2	8.8419e-71	1.93163e-69
RFC2	2	1.74072e-24	1.33845e-23
RFC3	2	4.25458e-26	3.4683e-25
RFC4	2	6.23638e-27	5.20828e-26
RFLNB	2	1.26323e-32	1.25236e-31
RFTN1	2	2.83014e-41	3.48649e-40
RGCC	3	4.23534e-18	2.53378e-17
RGL1	2	2.26327e-25	1.79944e-24
RGS10	2	2.5083e-28	2.18796e-27
RGS16	2	4.29524e-11	1.77963e-10
RGS2	2	6.61777e-115	2.60768e-113
RGS4	2	8.83031e-68	1.82622e-66
RGS5	1	5.00884e-29	4.47673e-28
RHOB	2	2.48916e-61	4.56177e-60
RHOC	2	5.98601e-99	1.87057e-97
RHOU	2	1.2159e-98	3.7857e-97
RIMS1	2	3.62138e-09	1.32223e-08
RIMS2	3	3.13008e-35	3.33783e-34
RLN2	3	1.24844e-06	3.6968e-06
RMST	2	4.26645e-10	1.66653e-09
RND3	2	1.96337e-108	6.99354e-107
RNF212	3	4.9482e-07	1.52201e-06
ROBO2	3	2.01277e-37	2.28489e-36
RPL22L1	2	1.32083e-87	3.6525e-86
RPP25	2	1.20596e-23	8.97738e-23
RPRM	2	2.05646e-19	1.30098e-18
RPS27L	2	6.02878e-51	9.01517e-50
RRAD	1	8.34612e-23	6.01403e-22
RRAS	2	5.16824e-59	9.05343e-58
RRBP1	2	7.65952e-166	4.75225e-164
RRM1	3	1.69255e-10	6.7933e-10
RRM2	3	1.08031e-44	1.43107e-43
RTKN2	2	1.55328e-20	1.02681e-19
RUNX1	3	3.45993e-81	8.74568e-80
RUNX2	3	2.40387e-12	1.07594e-11
S100A10	2	0	0
S100A11	2	0	0
S100A13	3	2.84812e-20	1.86472e-19
S100A16	2	2.70445e-51	4.06907e-50
S100A3	3	4.91781e-14	2.43988e-13
S100A4	1	2.57156e-22	1.80932e-21
S100A6	3	5.3452e-11	2.20183e-10
S100A8	1	2.76316e-22	1.94172e-21
S1PR5	3	1.82706e-57	3.07732e-56
SAMD11	2	6.51213e-35	6.8884e-34
SAMD14	3	1.40368e-15	7.54795e-15
SAT1	2	5.63628e-111	2.08604e-109
SBF2-AS1	1	9.96808e-39	1.15776e-37
SBSPON	2	2.61003e-09	9.6307e-09
SCG2	3	3.83258e-183	2.61566e-181
SCG3	2	2.93312e-15	1.55274e-14
SCG5	2	3.18639e-30	2.93713e-29
SCN7A	2	2.44635e-20	1.60352e-19
SCN9A	2	6.74149e-09	2.40584e-08
SCRG1	2	8.29642e-82	2.11906e-80
SCUBE3	1	5.74462e-185	4.0006e-183
SDC1	3	3.93914e-13	1.84896e-12
SDC2	2	3.21473e-61	5.85375e-60
SDF2L1	2	2.76117e-45	3.7008e-44
SDSL	2	5.73619e-43	7.35872e-42
SEC11C	2	1.08135e-86	2.95673e-85
SEC24D	2	2.84642e-52	4.35567e-51
SEC61B	2	3.62214e-205	2.88789e-203
SEL1L3	2	2.30952e-66	4.64135e-65
SELENOM	2	5.33675e-38	6.11522e-37
SEMA3D	2	4.52822e-24	3.42012e-23
SEMA6A	2	2.46242e-40	2.95248e-39
SEPTIN11	2	5.58579e-65	1.09294e-63
SERINC2	2	1.71742e-35	1.84641e-34
SERP1	2	9.35157e-141	4.66539e-139
SERPINA3	2	1.13905e-09	4.2987e-09
SERPINB9	2	1.25119e-35	1.35542e-34
SERPINE1	2	1.67282e-278	1.78385e-276
SERPINE2	2	0	0
SERPING1	2	3.8296e-127	1.71049e-125
SERPINH1	2	6.49614e-100	2.05635e-98
SERTAD1	2	5.16618e-18	3.07556e-17
SERTAD4	3	2.57875e-37	2.92155e-36
SERTAD4-AS1	2	3.68014e-89	1.0413e-87
SESN3	2	9.10957e-45	1.20955e-43
SEZ6L2	2	8.59405e-72	1.91425e-70
SFRP1	2	6.41818e-249	6.15208e-247
SFRP5	2	1.42649e-19	9.08502e-19
SGCG	2	5.58439e-49	8.01352e-48
SGK1	3	2.20841e-143	1.12814e-141
SGO1	3	4.5721e-32	4.44496e-31
SGO2	3	4.78705e-13	2.23588e-12
SH2D3A	3	7.7653e-09	2.75278e-08
SH2D3C	3	1.26267e-24	9.75267e-24
SH2D4A	3	1.69315e-08	5.84789e-08
SH3BGR	1	2.68614e-35	2.86981e-34
SH3BGRL3	2	0	0
SH3GL3	1	9.02655e-37	1.00925e-35
SH3RF1	2	2.70749e-70	5.86979e-69
SH3TC1	3	9.09565e-07	2.72789e-06
SHC1	2	4.28718e-49	6.16761e-48
SHCBP1	3	2.77236e-07	8.70965e-07
SHISA2	2	1.26541e-15	6.82592e-15
SHISA3	3	1.52158e-115	6.05157e-114
SHISA5	2	1.18008e-73	2.69538e-72
SHISA9	3	1.51873e-10	6.11723e-10
SKA1	3	1.77392e-25	1.41698e-24
SKA3	3	3.4055e-12	1.51432e-11
SKAP2	2	2.67762e-57	4.49218e-56
SKIL	2	1.49277e-40	1.80253e-39
SLBP	2	4.66538e-53	7.22986e-52
SLC14A1	1	1.0241e-07	3.33332e-07
SLC16A12	1	1.79243e-10	7.18405e-10
SLC16A2	1	1.27311e-08	4.44116e-08
SLC18A3	2	2.67708e-09	9.87171e-09
SLC22A16	1	1.09176e-09	4.1257e-09
SLC22A3	3	4.07375e-10	1.59711e-09
SLC2A1	2	2.49564e-50	3.69623e-49
SLC39A1	2	3.41819e-108	1.2125e-106
SLC3A2	2	0	0
SLC43A3	3	5.17183e-32	5.01374e-31
SLC44A1	2	5.41493e-49	7.78345e-48
SLC6A6	1	2.94983e-19	1.85037e-18
SLC7A11	2	2.16781e-06	6.27646e-06
SLC7A4	2	3.90616e-39	4.56486e-38
SLC7A5	2	5.44418e-50	7.98012e-49
SLC7A7	2	2.03695e-26	1.67088e-25
SLC9A3R1	2	7.78959e-103	2.54122e-101
SLFN5	2	2.23147e-53	3.48656e-52
SLIT2	1	6.96456e-22	4.81871e-21
SLITRK4	2	1.0779e-24	8.34825e-24
SLITRK5	3	3.93445e-11	1.63412e-10
SLITRK6	3	1.57896e-15	8.47708e-15
SMAGP	2	1.26203e-36	1.40645e-35
SMC2	2	3.22445e-11	1.34611e-10
SMC4	2	7.25632e-34	7.42251e-33
SMOC2	3	9.62732e-75	2.23181e-73
SMPX	1	0	0
SMS	2	3.14207e-09	1.15191e-08
SMURF2	3	8.75917e-19	5.38749e-18
SMYD1	1	0	0
SNAI1	2	4.82935e-15	2.53222e-14
SNAI2	2	1.62425e-111	6.03768e-110
SNAP25	2	2.96313e-09	1.08865e-08
SNCAIP	2	7.17727e-12	3.12873e-11
SNCG	2	3.44644e-95	1.03709e-93
SNHG1	2	1.80218e-51	2.72595e-50
SNHG12	2	3.15509e-42	3.99053e-41
SNHG15	2	2.27501e-34	2.37118e-33
SNHG17	2	3.90066e-22	2.72201e-21
SNHG3	2	2.65212e-19	1.66678e-18
SNHG30	2	4.94971e-12	2.18053e-11
SNHG7	2	4.06573e-176	2.68874e-174
SNHG8	2	1.38068e-79	3.3944e-78
SNRPB	2	3.68771e-157	2.11851e-155
SNRPD1	2	1.21565e-71	2.7007e-70
SOCS1	2	9.03986e-28	7.71962e-27
SOD3	1	4.10984e-48	5.79522e-47
SORBS2	1	0	0
SOX3	1	7.40828e-08	2.44204e-07
SOX4	2	0	0
SOX9	2	1.17023e-103	3.87698e-102
SP140L	3	1.82407e-42	2.32083e-41
SPAG5	3	5.2727e-09	1.90035e-08
SPARC	2	0	0
SPATS2L	2	9.58238e-87	2.62853e-85
SPC24	3	1.92831e-07	6.13477e-07
SPC25	3	2.66472e-24	2.03243e-23
SPDL1	3	6.96089e-55	1.11205e-53
SPHK1	2	4.42912e-16	2.4393e-15
SPHKAP	1	5.88914e-208	4.73965e-206
SPINT1	3	1.81896e-47	2.54386e-46
SPINT1-AS1	3	8.61966e-08	2.8239e-07
SPINT2	2	5.74512e-15	2.99491e-14
SPNS2	3	9.64046e-16	5.23006e-15
SPOCD1	3	5.78301e-27	4.83912e-26
SPOCK1	2	4.39676e-45	5.86074e-44
SPON1	2	1.65191e-20	1.09117e-19
SPP1	2	0	0
SPRR2F	2	3.04303e-129	1.3957e-127
SPRY1	2	7.83681e-57	1.30833e-55
SPSB1	2	4.29004e-54	6.77747e-53
SPX	2	7.5103e-80	1.86251e-78
SQSTM1	2	2.17857e-105	7.44906e-104
SRM	2	1.91891e-59	3.37183e-58
SRPX2	3	1.99292e-17	1.15815e-16
SRSF7	2	2.22181e-06	6.42625e-06
SRSF9	2	9.08651934303131e-313	1.14840142985777e-310
SRXN1	2	2.96525e-34	3.07744e-33
SSC5D	3	1.90417e-11	8.08587e-11
SSR2	2	1.46507e-152	8.22272e-151
ST3GAL5	2	1.52653e-82	3.94631e-81
ST6GALNAC3	3	2.22986e-48	3.16521e-47
ST6GALNAC5	3	1.62387e-102	5.26739e-101
STAC	2	6.05873e-09	2.17264e-08
STAR	2	1.27995e-13	6.20061e-13
STAT4	1	8.58323e-07	2.58512e-06
STC2	2	2.63561e-18	1.589e-17
STK17B	2	4.04378e-22	2.81957e-21
STK32B	3	9.63619e-16	5.22941e-15
STK38L	3	1.0938e-15	5.9152e-15
STMN1	2	2.02992e-66	4.08907e-65
STMN2	2	1.10513e-284	1.201e-282
STMN3	2	8.26868e-30	7.5444e-29
STRIP2	1	3.36717e-272	3.52458e-270
STRIT1	1	4.51349e-17	2.59116e-16
STXBP6	2	2.48734e-23	1.82848e-22
SUCNR1	3	5.59638e-74	1.28513e-72
SULF1	2	0	0
SULF2	2	6.34641e-89	1.78684e-87
SULT1A1	2	9.22377e-15	4.76608e-14
SYNE2	1	8.47718e-19	5.21593e-18
SYNJ2	2	1.94148e-08	6.67855e-08
SYNPO	2	8.41366e-76	1.97461e-74
SYNPO2	1	4.92889e-71	1.08512e-69
SYNPO2L	1	0	0
SYT1	2	1.29514e-129	5.98851e-128
SYT10	2	2.96237e-23	2.17393e-22
TAC1	2	7.46104e-110	2.71429e-108
TACC3	3	6.13455e-13	2.84423e-12
TAF1D	2	8.2321e-58	1.39757e-56
TAFA4	1	3.49391e-15	1.84332e-14
TAGLN	2	0	0
TAGLN2	2	0	0
TALDO1	2	4.33283e-76	1.02109e-74
TAPBP	3	5.56516e-12	2.44346e-11
TBX18	2	2.38127e-95	7.17832e-94
TBX2	1	6.96885e-20	4.49707e-19
TBX3	2	4.16809e-09	1.51472e-08
TCAP	1	0	0
TCEAL2	2	4.67557e-11	1.93206e-10
TCEAL7	2	1.57236e-73	3.58657e-72
TCF19	2	1.93967e-15	1.03615e-14
TCF21	2	2.4164e-135	1.15811e-133
TCF4	3	2.31673e-33	2.33617e-32
TCIM	3	1.2291e-79	3.02611e-78
TDGF1	1	8.73087e-14	4.26837e-13
TEK	3	2.87368e-22	2.01524e-21
TFAP2A	3	9.31693e-86	2.50339e-84
TFPI	3	2.38372e-214	1.97433e-212
TFPI2	3	0	0
TGFB1	2	3.74011e-147	1.97566e-145
TGFB1I1	2	4.77496e-67	9.72199e-66
TGFB2	2	6.43389e-43	8.22285e-42
TGFBI	3	0	0
TGFBR1	2	1.24116e-57	2.10086e-56
TGIF1	2	7.21105e-94	2.13602e-92
TGM2	1	1.14522e-166	7.1574e-165
THBD	3	3.46423e-58	5.97038e-57
THBS2	3	8.06733e-14	3.95531e-13
THBS3	2	1.84919e-64	3.59758e-63
THY1	3	3.43911e-282	3.69044e-280
TIE1	3	9.97178e-26	8.02919e-25
TIMP1	2	1.31141e-107	4.61348e-106
TIMP3	1	1.82677e-34	1.90982e-33
TINAGL1	2	1.33521e-55	2.16552e-54
TK1	3	8.37481e-37	9.37605e-36
TKT	2	0	0
TLE1	2	9.73384e-149	5.23908e-147
TLE4	2	1.11319e-43	1.44656e-42
TLR4	3	5.43121e-12	2.38772e-11
TM4SF1	3	5.91269e-57	9.89042e-56
TMBIM4	2	5.69328e-35	6.03346e-34
TMEM100	3	1.98069e-09	7.35784e-09
TMEM151A	2	2.0523e-12	9.2124e-12
TMEM154	3	6.36824e-55	1.02023e-53
TMEM163	1	1.09237e-114	4.28461e-113
TMEM165	2	6.34365e-44	8.3194e-43
TMEM173	1	4.85199e-11	2.00302e-10
TMEM200A	3	1.43845e-12	6.51867e-12
TMEM215	2	3.11247e-14	1.56283e-13
TMEM243	2	2.27447e-50	3.37746e-49
TMEM255A	1	1.39006e-09	5.21715e-09
TMEM255B	3	5.14341e-23	3.73434e-22
TMEM35B	2	9.07421e-69	1.92567e-67
TMEM40	1	1.4122e-06	4.16004e-06
TMEM54	2	1.65108e-84	4.35405e-83
TMEM87B	2	2.10205e-58	3.63008e-57
TMEM97	2	2.58801e-06	7.42878e-06
TMOD3	2	1.35518e-103	4.48103e-102
TMSB10	2	0	0
TMSB4X	2	0	0
TNC	3	0	0
TNFAIP2	2	1.54611e-25	1.2379e-24
TNFAIP3	3	3.46157e-39	4.05085e-38
TNFRSF11B	2	2.86273e-20	1.87357e-19
TNFRSF12A	2	5.36166e-145	2.78057e-143
TNFRSF19	3	3.79151e-40	4.53017e-39
TNFRSF1A	2	5.15491e-105	1.74857e-103
TNFRSF21	2	5.06507e-40	6.02652e-39
TNFRSF9	2	1.41708e-54	2.25333e-53
TNFSF15	3	1.54042e-65	3.04197e-64
TNMD	1	3.03834e-14	1.52606e-13
TNNC1	1	0	0
TNNI3	1	0	0
TNNT1	2	1.57795e-38	1.83025e-37
TOP2A	3	2.25757e-160	1.34211e-158
TOX3	2	2.62694e-07	8.27105e-07
TP53I3	1	2.04381e-34	2.13151e-33
TPBG	2	1.42353e-72	3.22127e-71
TPM2	2	1.02537e-112	3.90511e-111
TPM3	2	2.39549e-261	2.44742e-259
TPM4	2	5.67855e-252	5.50496e-250
TPX2	3	6.10583e-48	8.58136e-47
TRAF4	2	7.70503e-109	2.77935e-107
TRAF5	2	9.08697e-66	1.80701e-64
TRBC2	3	4.80362e-137	2.34169e-135
TRDN-AS1	1	1.89978e-49	2.76099e-48
TRH	1	2.64989e-127	1.18668e-125
TRHDE	2	1.95086e-12	8.77091e-12
TRIB3	2	5.48841e-93	1.60348e-91
TRIL	2	3.71019e-33	3.72591e-32
TRIM38	2	6.16868e-28	5.30227e-27
TRIM55	1	3.76873e-276	3.99392e-274
TRIP13	2	1.25645e-16	7.09619e-16
TRPC4	3	1.1677e-35	1.26578e-34
TRPS1	2	3.77019e-29	3.3803e-28
TSHZ3	2	4.88366e-67	9.93146e-66
TSPAN11	3	1.48187e-06	4.35774e-06
TSPAN14	2	2.97801e-38	3.44013e-37
TSPAN32	1	5.84721e-100	1.85437e-98
TSPAN5	2	1.2172e-43	1.5805e-42
TSPO	2	1.45121e-139	7.15624e-138
TTK	3	9.3687e-16	5.09235e-15
TTLL7	2	6.25296e-36	6.81713e-35
TTYH1	2	3.19454e-112	1.20321e-110
TUBA1A	2	4.32217e-117	1.74338e-115
TUBA1B	2	1.00675e-97	3.12311e-96
TUBA1C	2	1.10893034209068e-318	1.4667107957008e-316
TUBA4A	2	9.46226e-10	3.59806e-09
TUBB	2	2.99626e-125	1.32441e-123
TUBB2A	2	3.28135e-28	2.85354e-27
TUBB2B	2	1.10037e-79	2.72095e-78
TUBB3	2	0	0
TUBB4B	2	5.78794e-28	4.98505e-27
TUNAR	3	7.89673e-14	3.87389e-13
TWF2	2	4.89594e-63	9.29194e-62
TWIST1	2	4.99418e-38	5.72653e-37
TWIST2	2	8.17977e-17	4.64901e-16
TXN	2	1.57767e-258	1.57417e-256
TXNDC5	2	2.65532e-94	7.90665e-93
TXNRD1	2	3.11407e-106	1.07555e-104
TYMS	3	2.68124e-17	1.55023e-16
UACA	3	9.83907e-53	1.51648e-51
UAP1	2	4.1073e-62	7.66725e-61
UBASH3B	3	2.29753e-56	3.78018e-55
UBE2C	3	1.4565e-186	1.02689e-184
UBE2S	2	3.86676e-65	7.57459e-64
UBE2T	2	1.64642e-31	1.57374e-30
UCK2	2	8.51879e-11	3.47389e-10
UCP2	1	3.58862e-33	3.60595e-32
UFD1	2	2.03045e-55	3.27135e-54
UGCG	2	4.91233e-124	2.13812e-122
UGDH	2	4.37727e-78	1.04895e-76
UHRF1	3	5.21073e-15	2.72465e-14
ULBP2	2	1.46129e-13	7.04509e-13
UNC5B-AS1	1	5.74451e-79	1.39223e-77
UNC5C	2	5.46112e-49	7.84323e-48
UPP1	2	1.79804e-211	1.46086e-209
VAMP5	2	1.1217e-11	4.83295e-11
VAMP8	3	4.65439e-18	2.77668e-17
VASN	2	9.9806e-54	1.56804e-52
VASP	2	6.3892e-44	8.3727e-43
VCAM1	1	0	0
VCAN	1	1.54046e-84	4.06862e-83
VGF	3	1.438e-146	7.57259e-145
VGLL3	3	7.08907e-52	1.08091e-50
VIM	2	0	0
VMP1	2	3.70603e-100	1.17971e-98
VRK1	2	1.70626e-26	1.40233e-25
VSNL1	1	1.98976e-17	1.15671e-16
VWDE	1	4.69774e-195	3.46982e-193
WFDC2	3	9.62756e-22	6.62361e-21
WIPF3	1	2.30896e-06	6.66589e-06
WNK4	3	2.11624e-21	1.43911e-20
WNT2B	3	1.6511e-40	1.98949e-39
WT1	3	3.78363e-60	6.73163e-59
XKR4	3	2.57565e-15	1.36903e-14
XRCC4	1	3.06305e-31	2.89699e-30
ZFAND2A	2	1.55457e-129	7.16869e-128
ZFAS1	2	1.08923164083192e-312	1.36650516587312e-310
ZFHX4	2	1.80214e-13	8.6371e-13
ZNF581	2	1.21328e-61	2.24523e-60
ZNF703	2	3.47758e-34	3.59821e-33
ZNF706	2	6.96954e-113	2.66027e-111
ZNF93	3	4.86824e-16	2.67596e-15
ZWINT	3	7.96251e-27	6.62714e-26
ZYX	2	5.2695e-71	1.15861e-69
